# Supplementary material for: A mesoionic carbene stabilized nickel(ii) hydroxide complex: a facile precursor for C–H activation chemistry
Source: Royal Society of Chemistry journal article supplement (doi:10.1039/d3dt03746k), 2024-01-01
Supplement: d3dt03746k1.pdf [file d3dt03746k1.pdf]

## A Mesoionic Carbene Stabilized Nickel(II) Hydroxide Complex: A Facile Precursor for C–H Activation Chemistry

- Supporting Information -

Anna Pavun,<sup>a</sup> Raphael Niess,<sup>a</sup> Lucas A. Scheibel,<sup>a</sup> Michael Seidl<sup>a</sup> and Stephan Hohloch<sup>a\*</sup>

### Contents

|                                  |     |
|----------------------------------|-----|
| 1. NMR spectra .....             | 2   |
| 2. IR spectra .....              | 85  |
| 3. UV-VIS spectra .....          | 100 |
| 4. Crystallographic details..... | 113 |
| 5. Computational details.....    | 119 |
| 6. Literature .....              | 120 |

# 1. NMR spectra

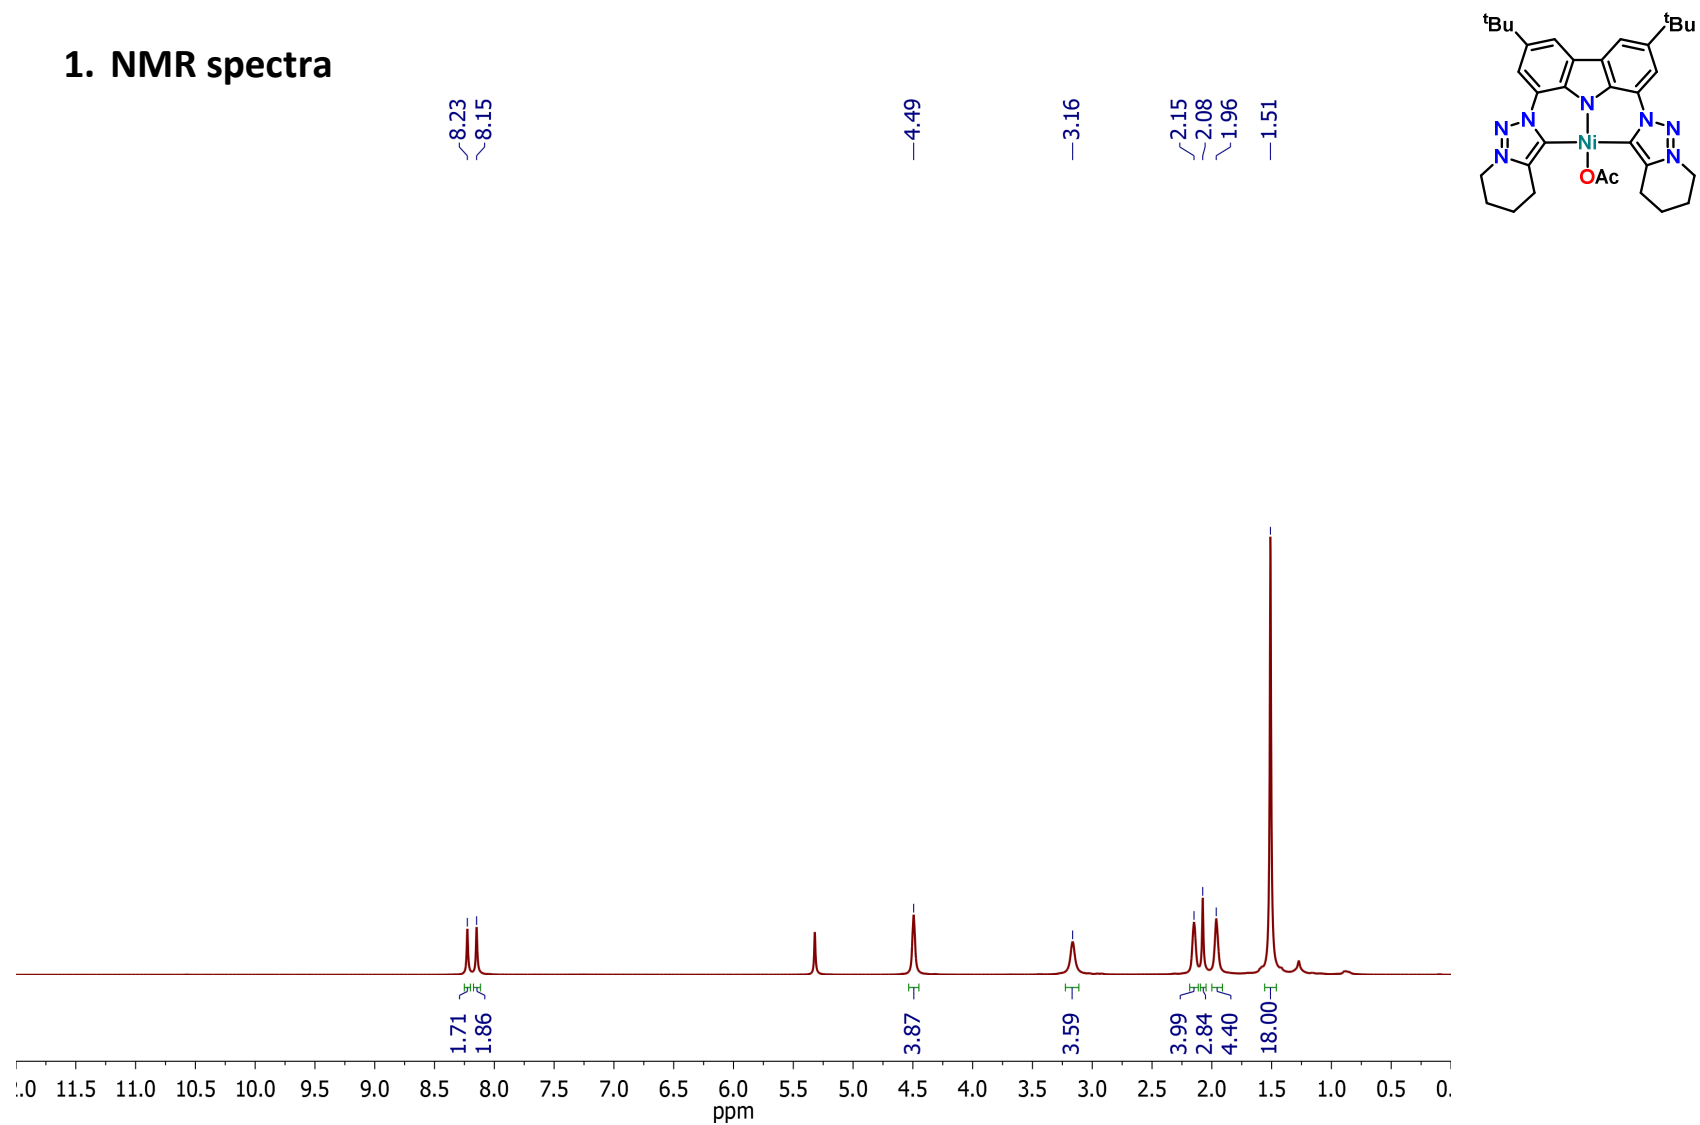

Figure S 1:  $^1\text{H}$  NMR of complex **O** in  $\text{CD}_2\text{Cl}_2$  at 298 K.

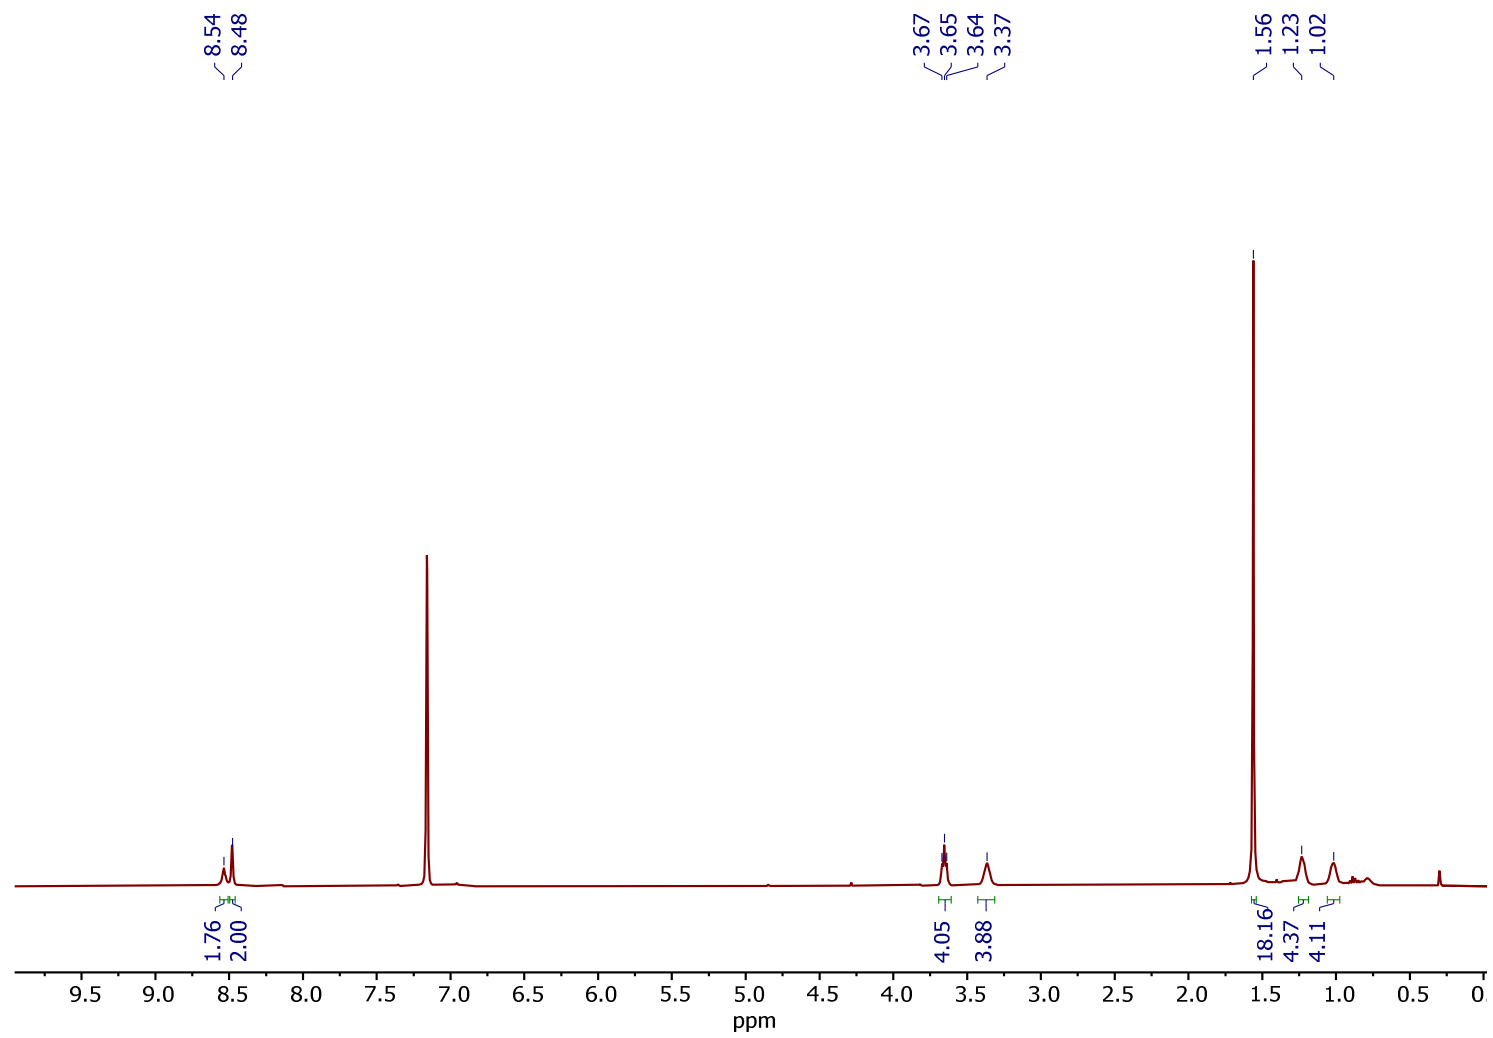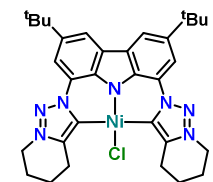

Figure S 2: <sup>1</sup>H-NMR of **1** in C<sub>6</sub>D<sub>6</sub> at 298K.

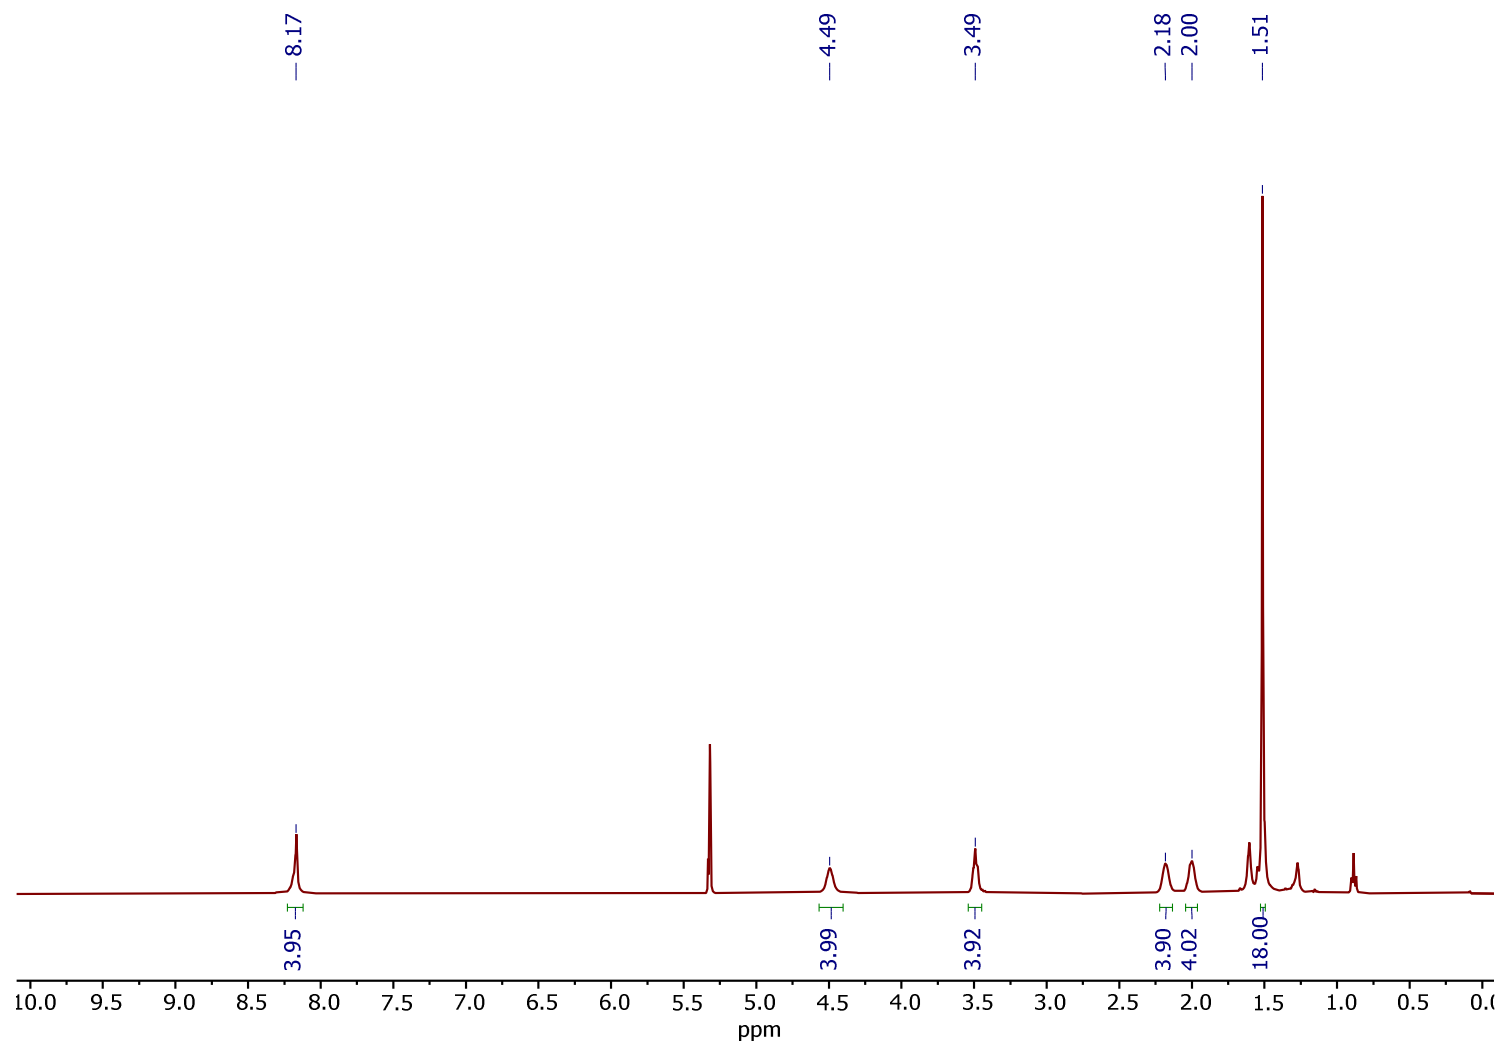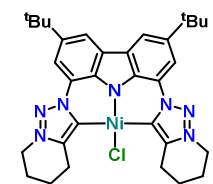

Figure S 3:  $^1\text{H-NMR}$  of **1** in  $\text{CD}_2\text{Cl}_2$  at 298K.

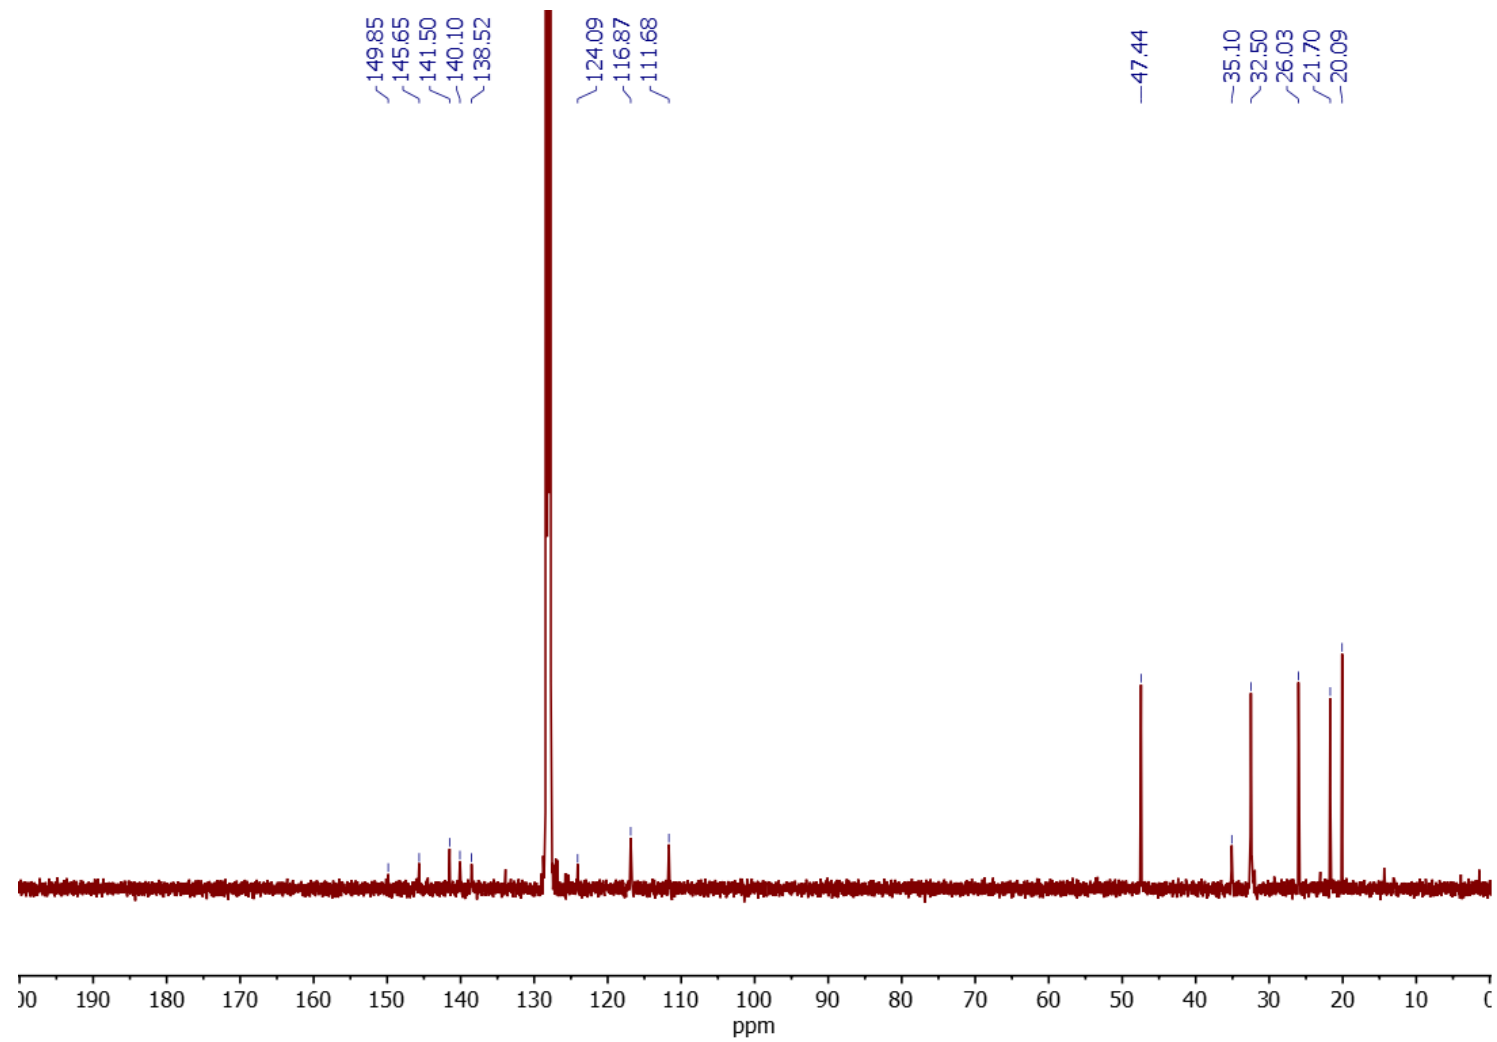

Figure S 4:  $^{13}\text{C}$ -NMR of **1** in  $\text{C}_6\text{D}_6$  at 298K.

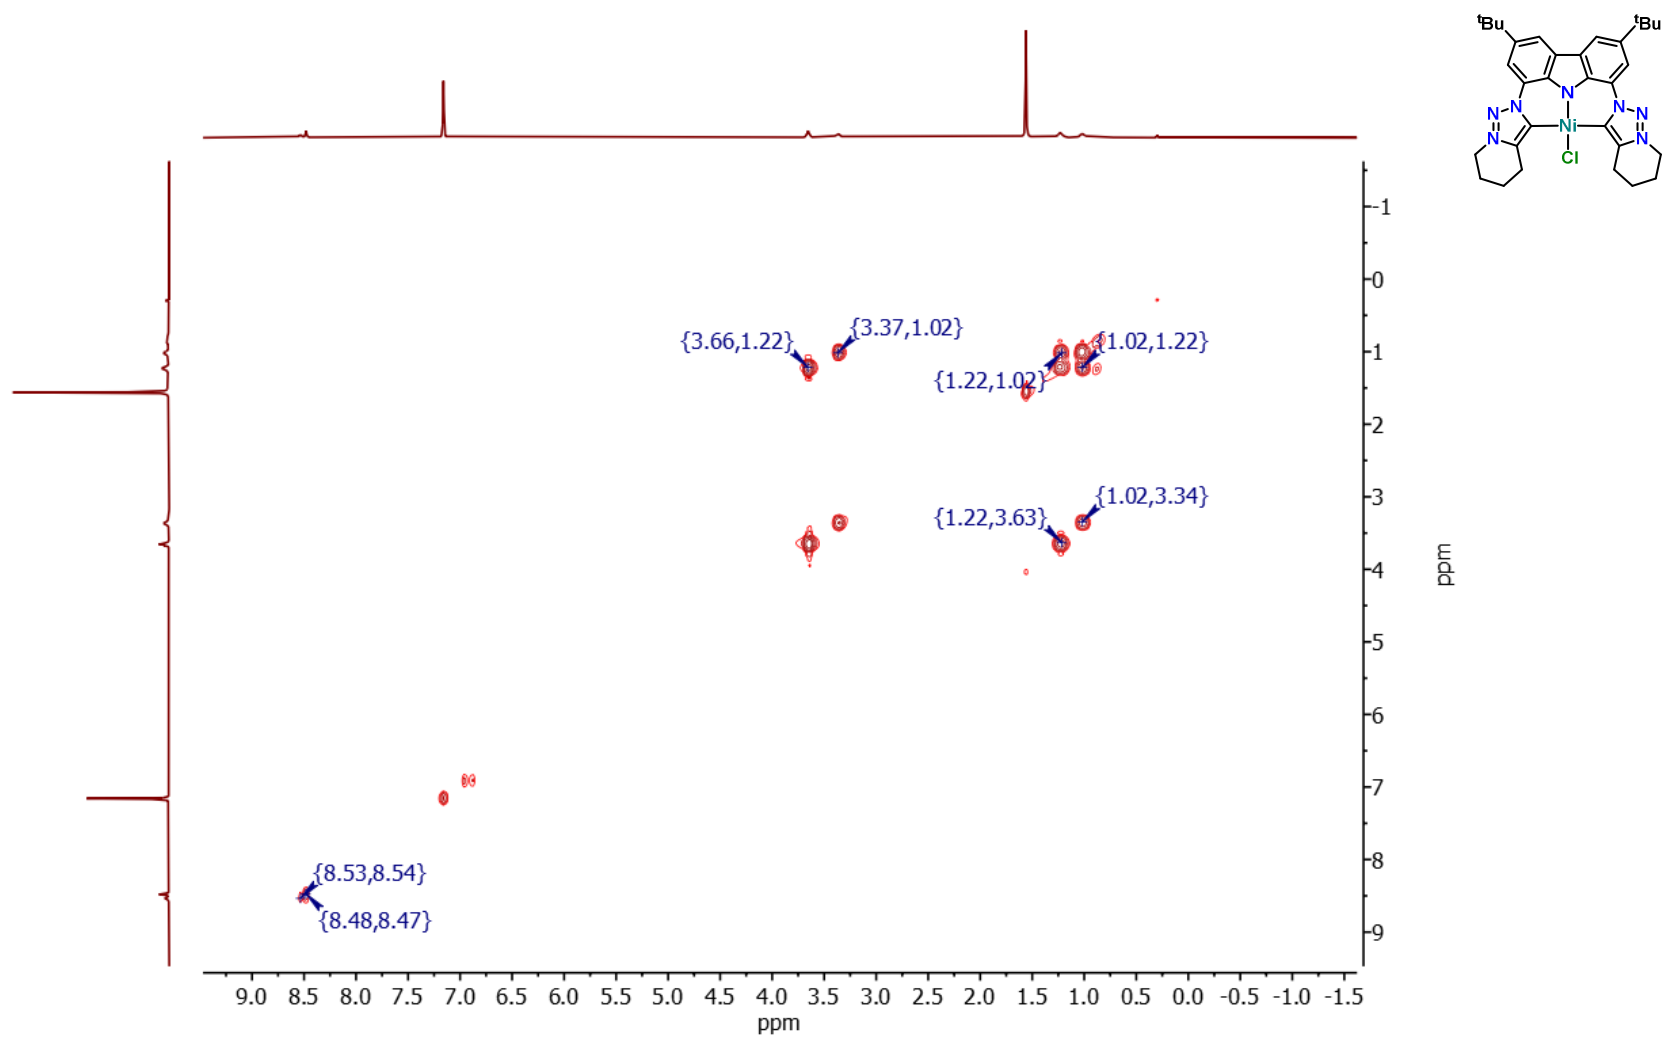

Figure S 5:  $^1\text{H} - ^1\text{H}$  COSY of **1** in  $\text{C}_6\text{D}_6$  at 298K.

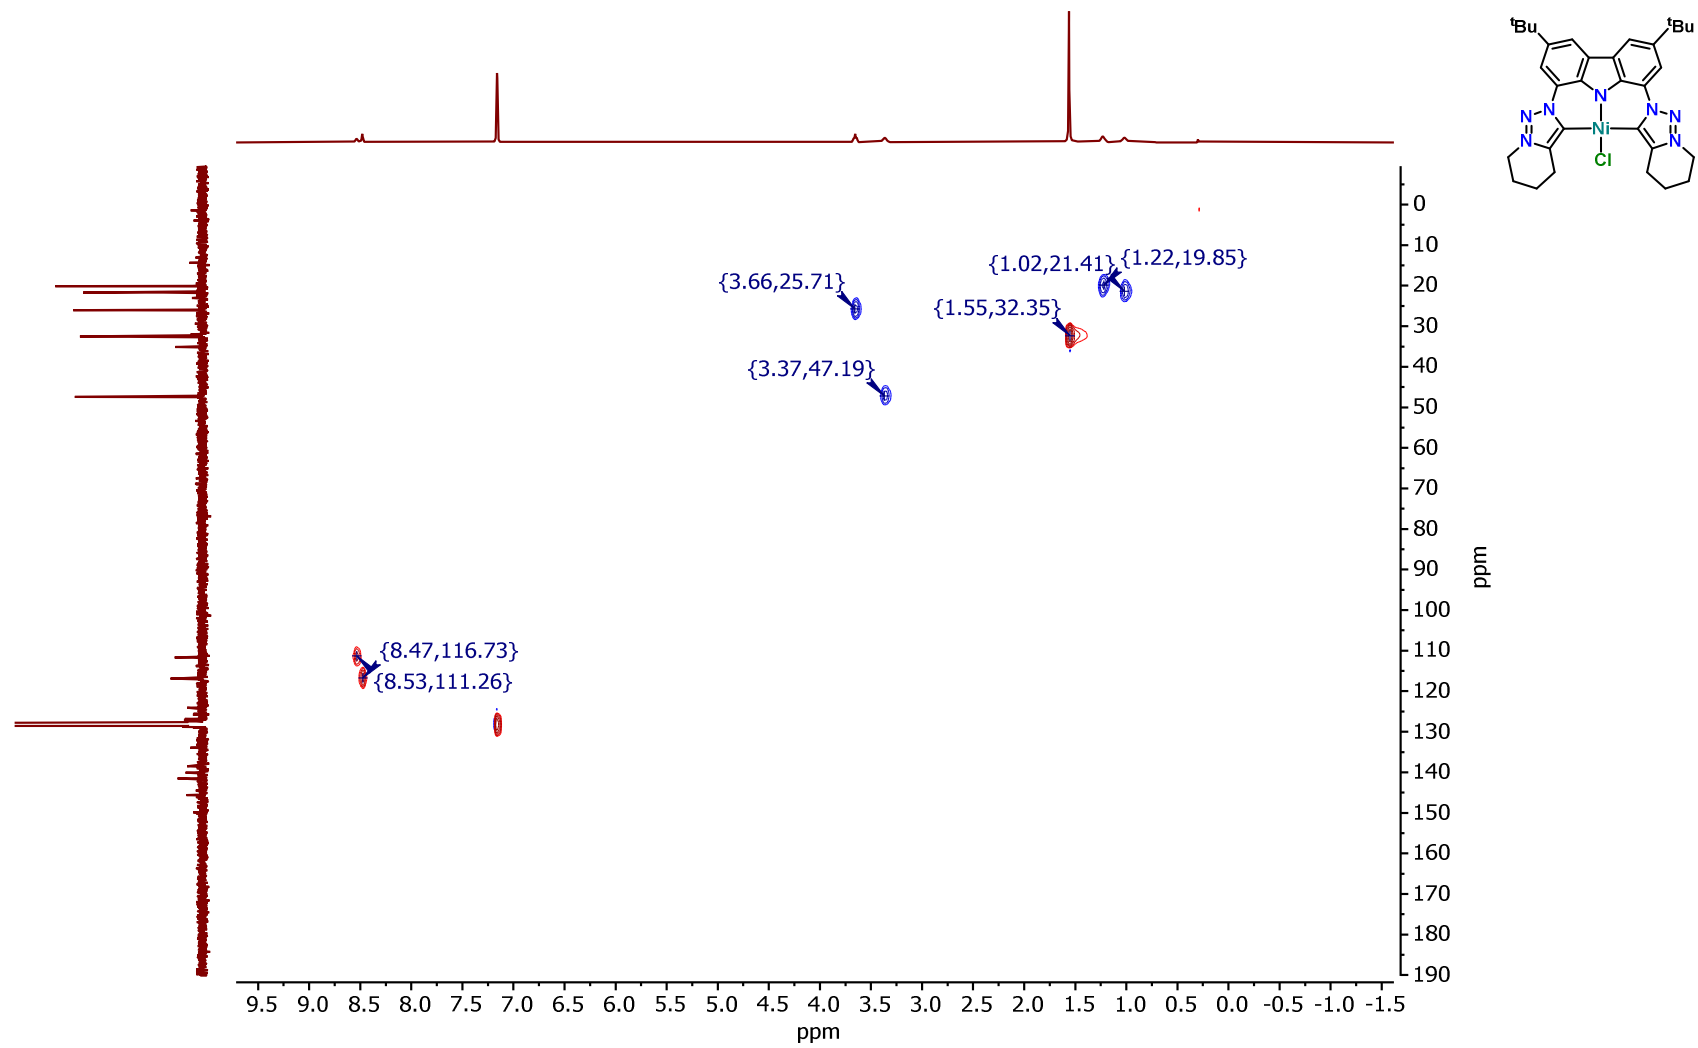

Figure S 6:  $^1\text{H}$  -  $^{13}\text{C}$  HSQC of **1** in  $\text{C}_6\text{D}_6$  at 298K.

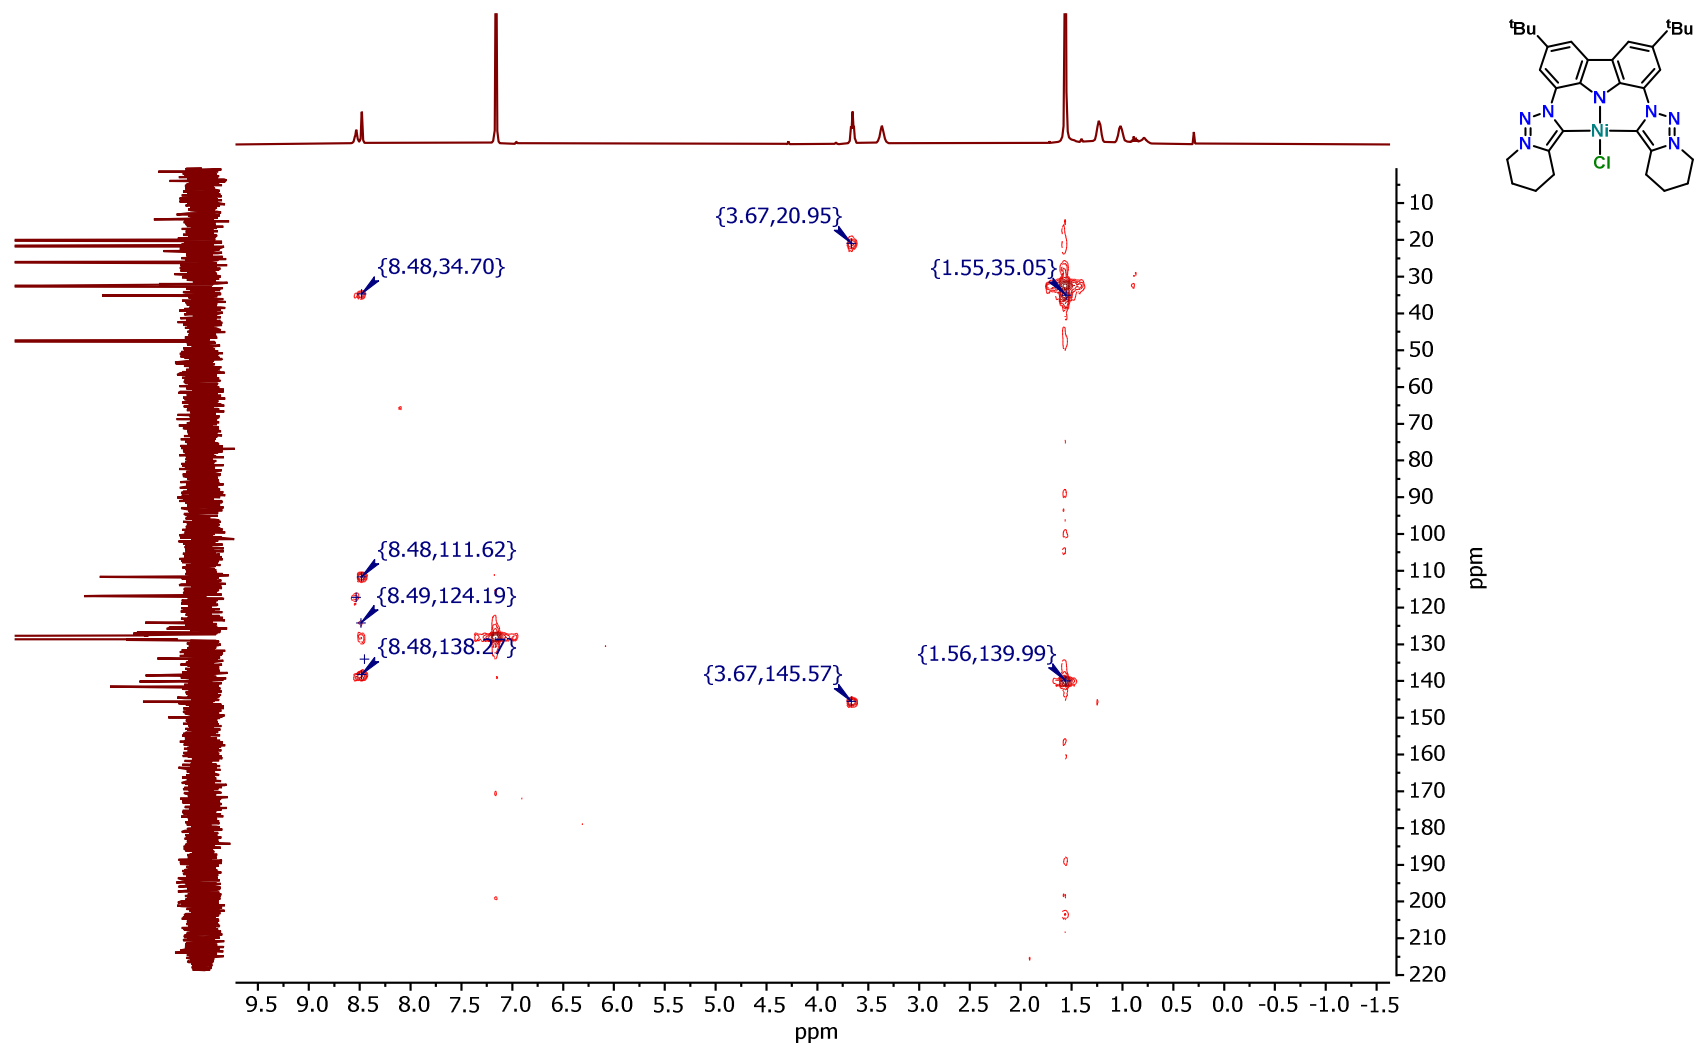

Figure S 7:  $^1\text{H}$  -  $^{13}\text{C}$  HMBC of **1** in  $\text{CD}_2\text{Cl}_2$  at 298K.



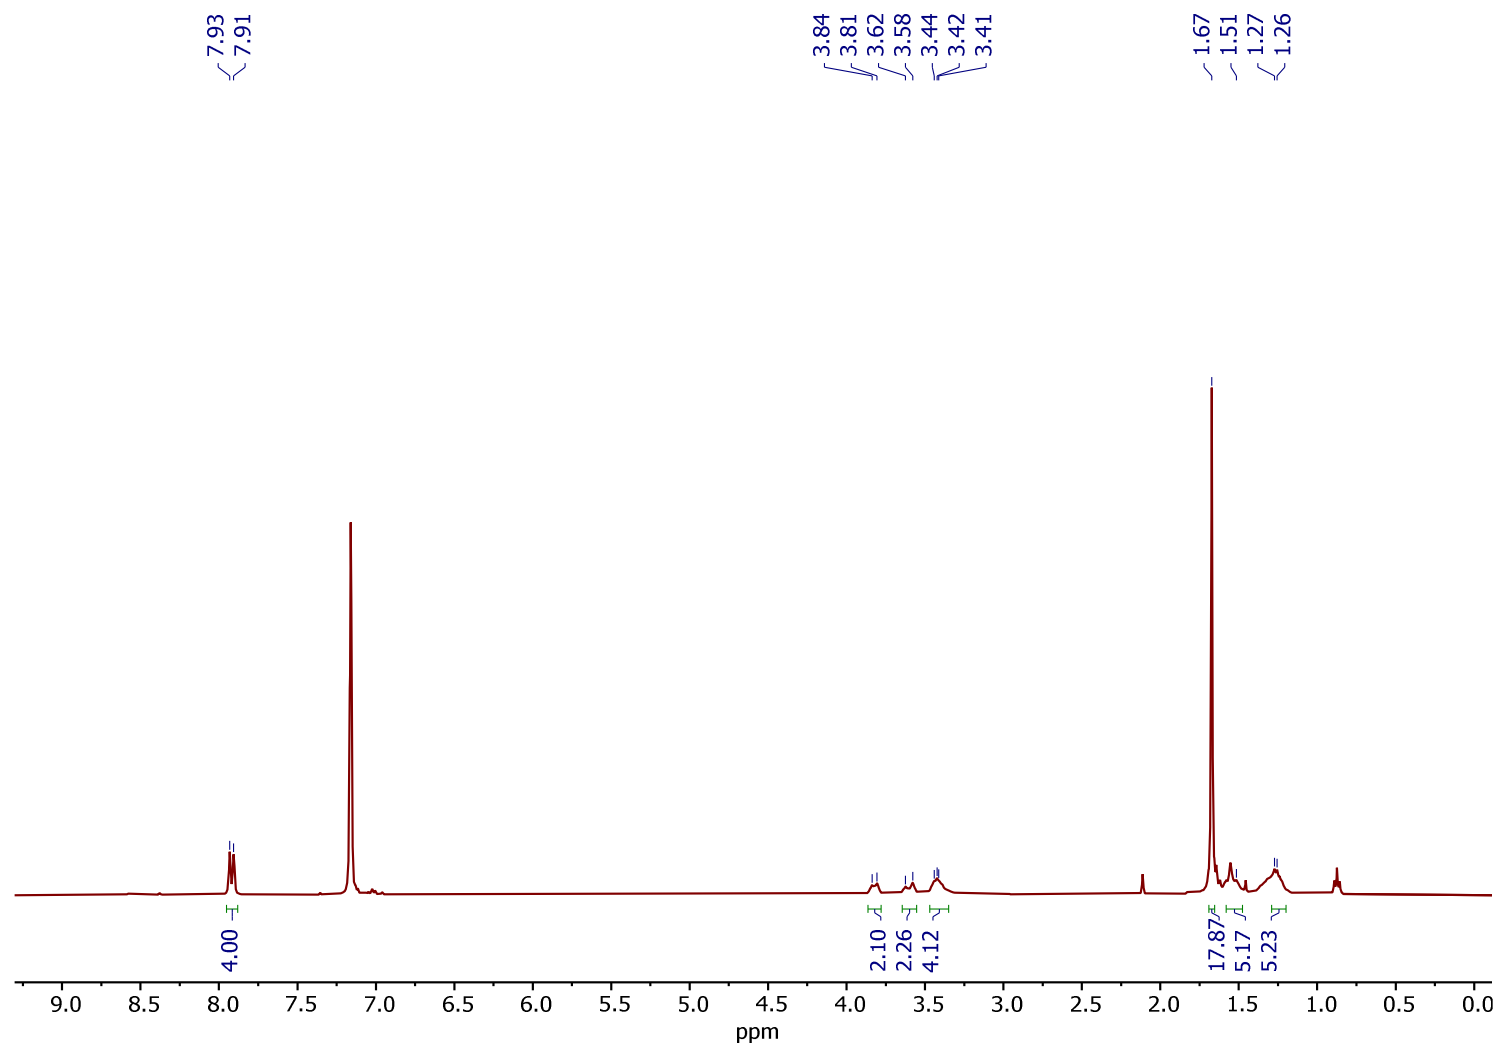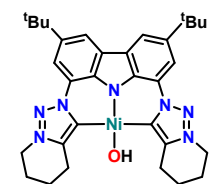

Figure S 8:  $^1\text{H}$  NMR of 2 in  $\text{C}_6\text{D}_6$  at 298K.

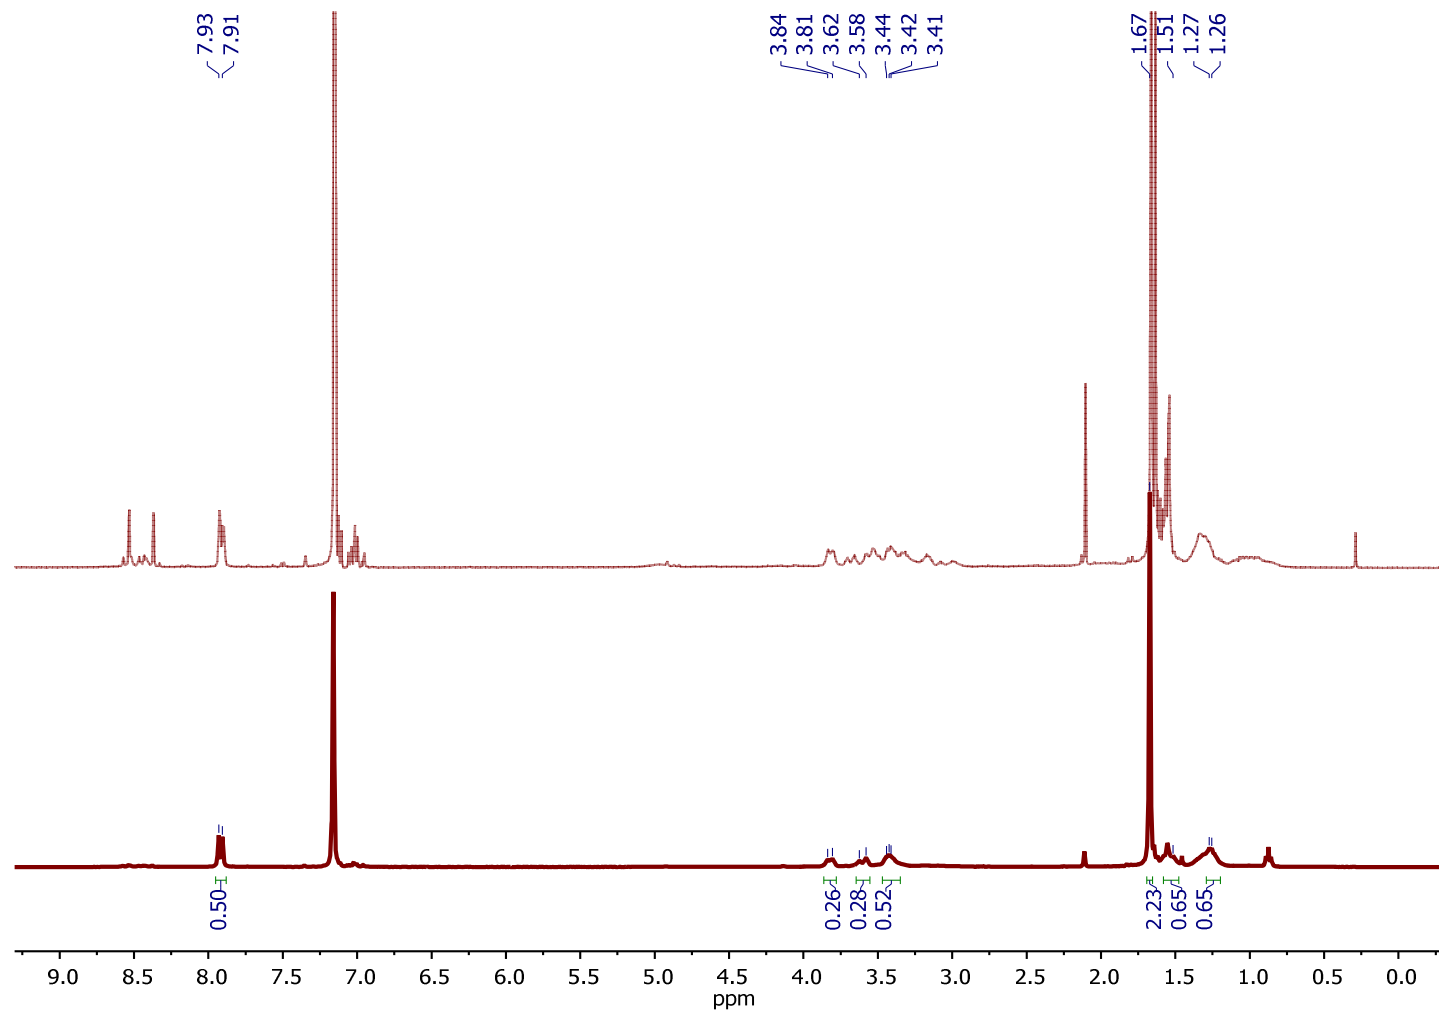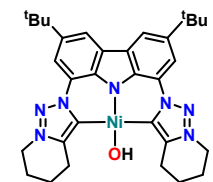

Figure S 9:  $^1\text{H}$  NMR comparison of **2** (dark red) and  $\mathbf{2}[\text{H}_2\text{O}]_n$  (crude **2**, light red) in  $\text{C}_6\text{D}_6$  at 298K.

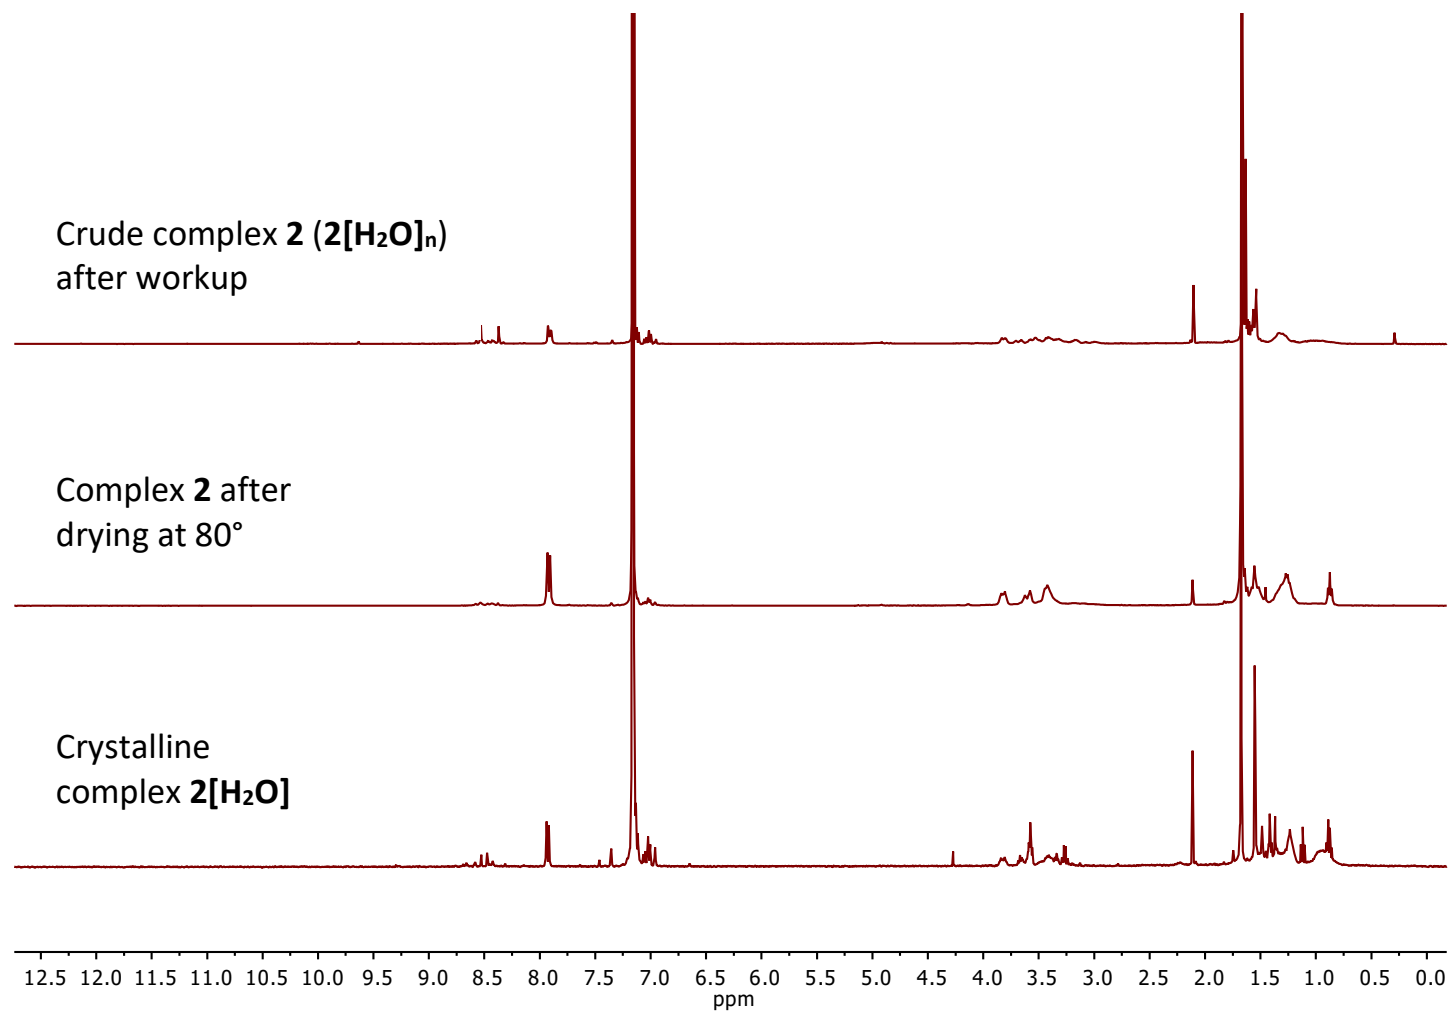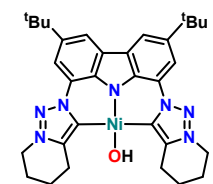

Figure S 10: <sup>1</sup>H NMR comparison of crude **2** (2[H<sub>2</sub>O]<sub>n</sub>), **2** and **2**[H<sub>2</sub>O] (obtained after crystallization) in C<sub>6</sub>D<sub>6</sub> at 298K.

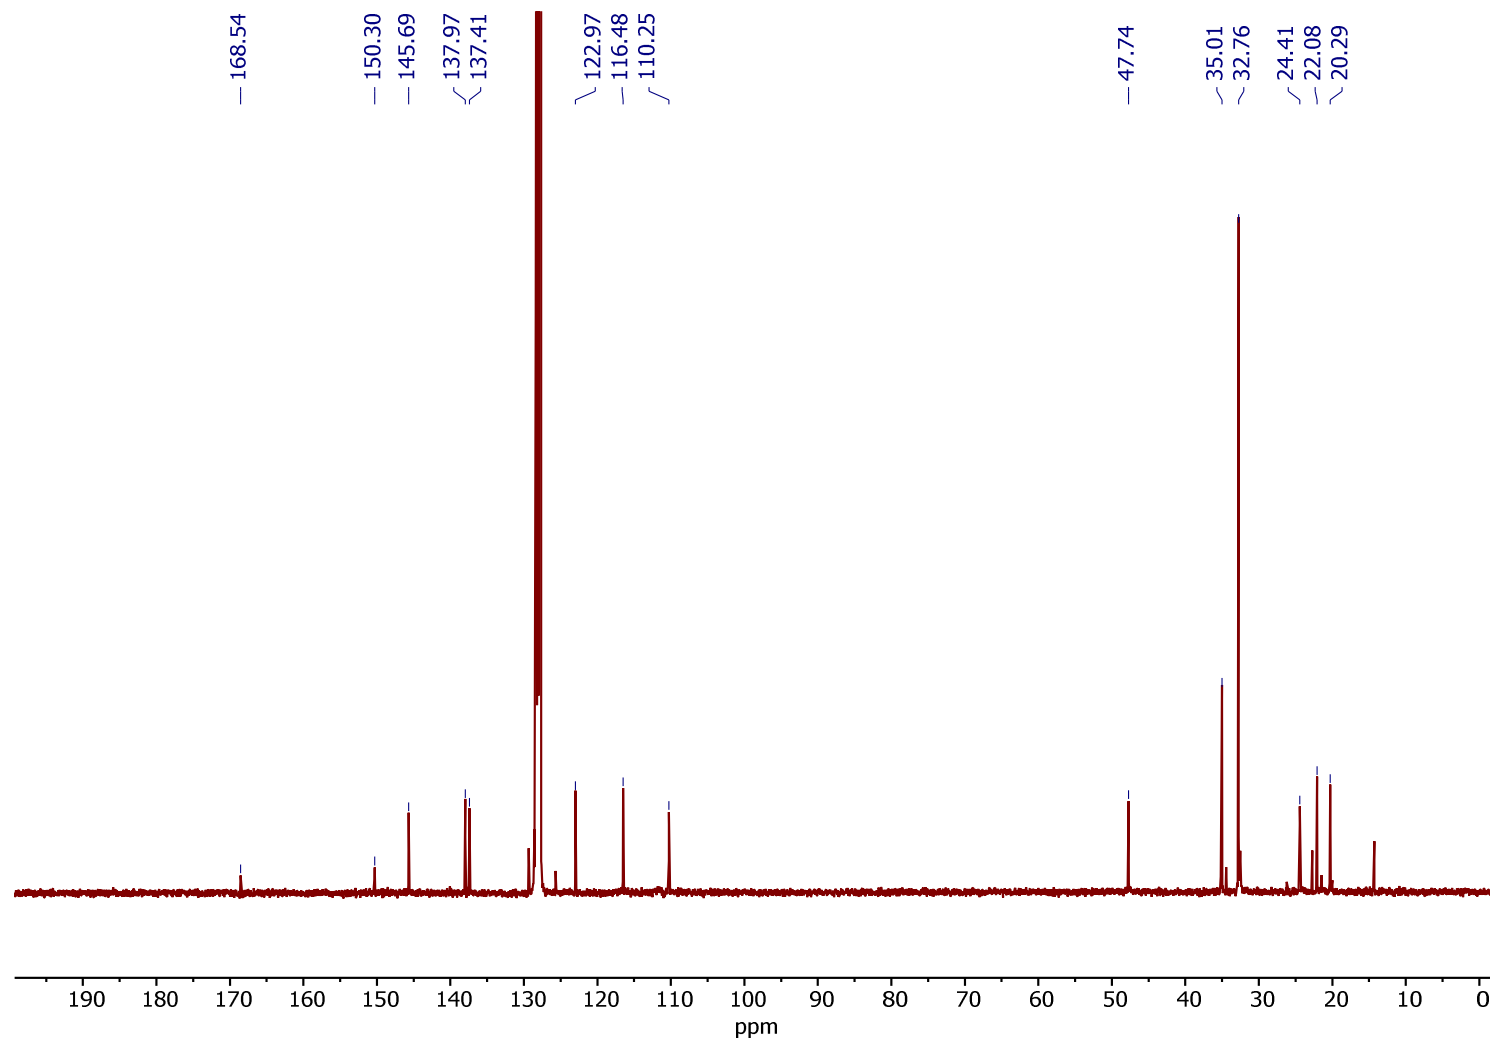

Figure S 11:  $^{13}\text{C}$  NMR of **2** in  $\text{C}_6\text{D}_6$  at 298K.

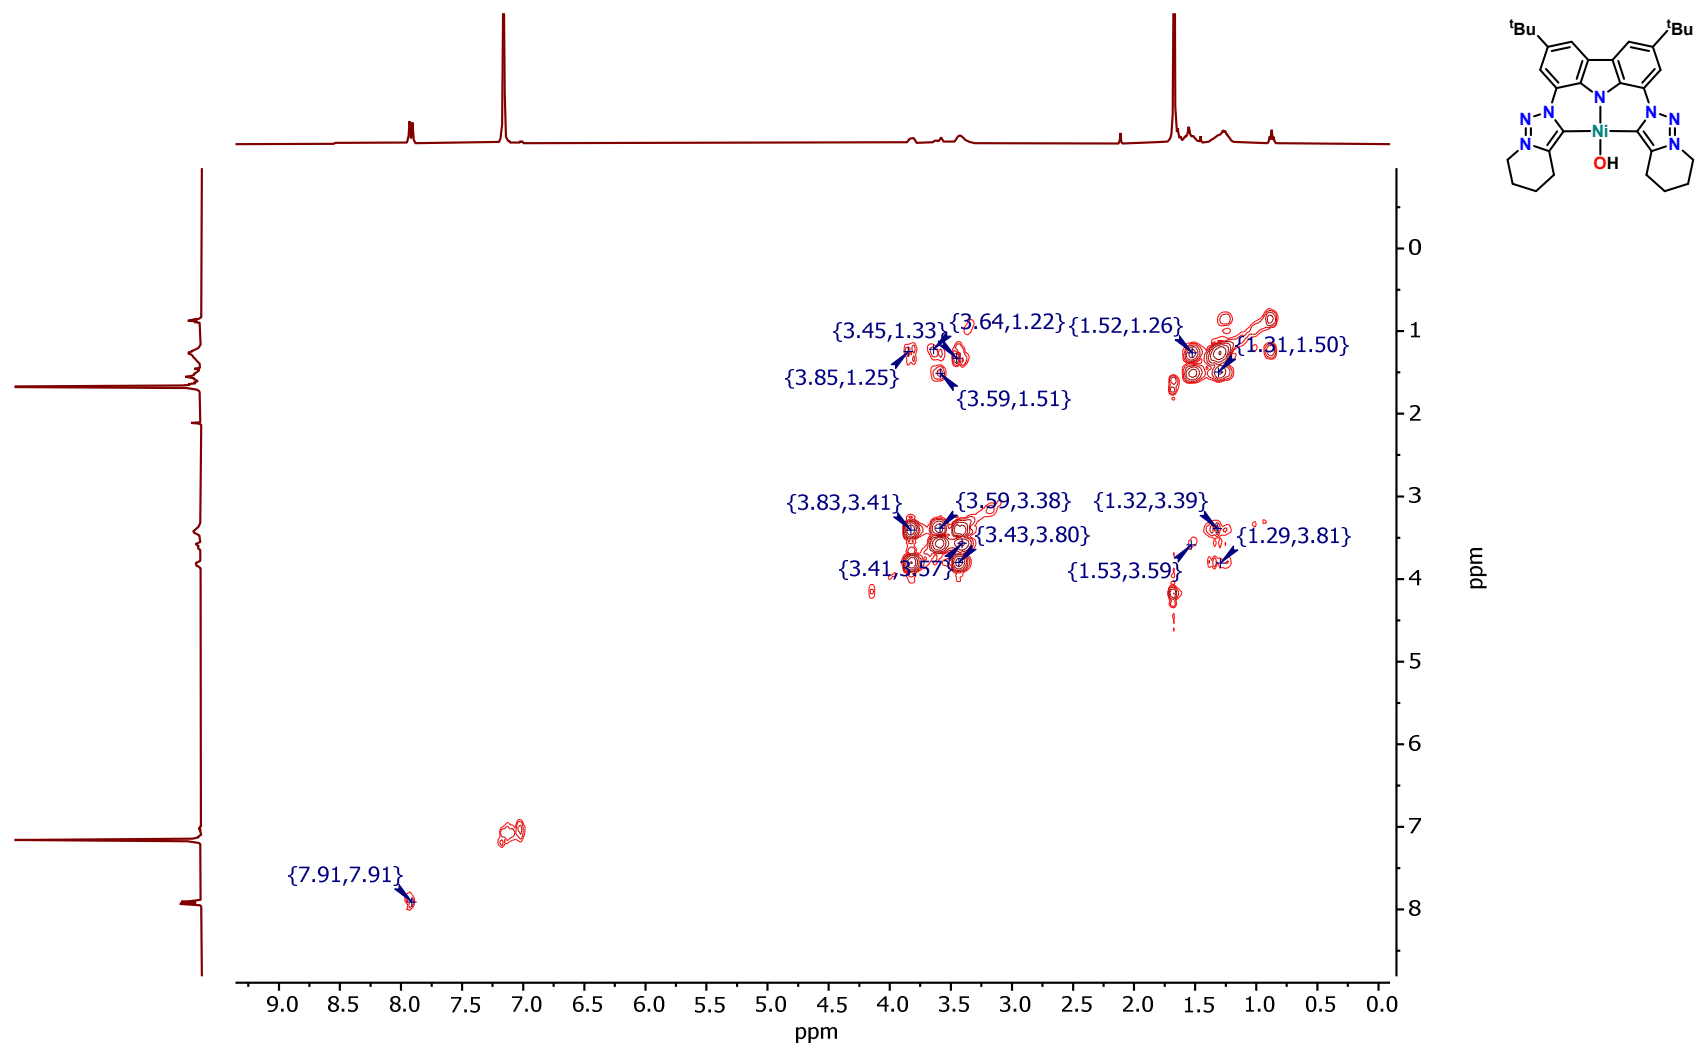

Figure S 12:  $^1\text{H} - ^1\text{H}$  COSY of **2** in  $\text{C}_6\text{D}_6$  at 298K.

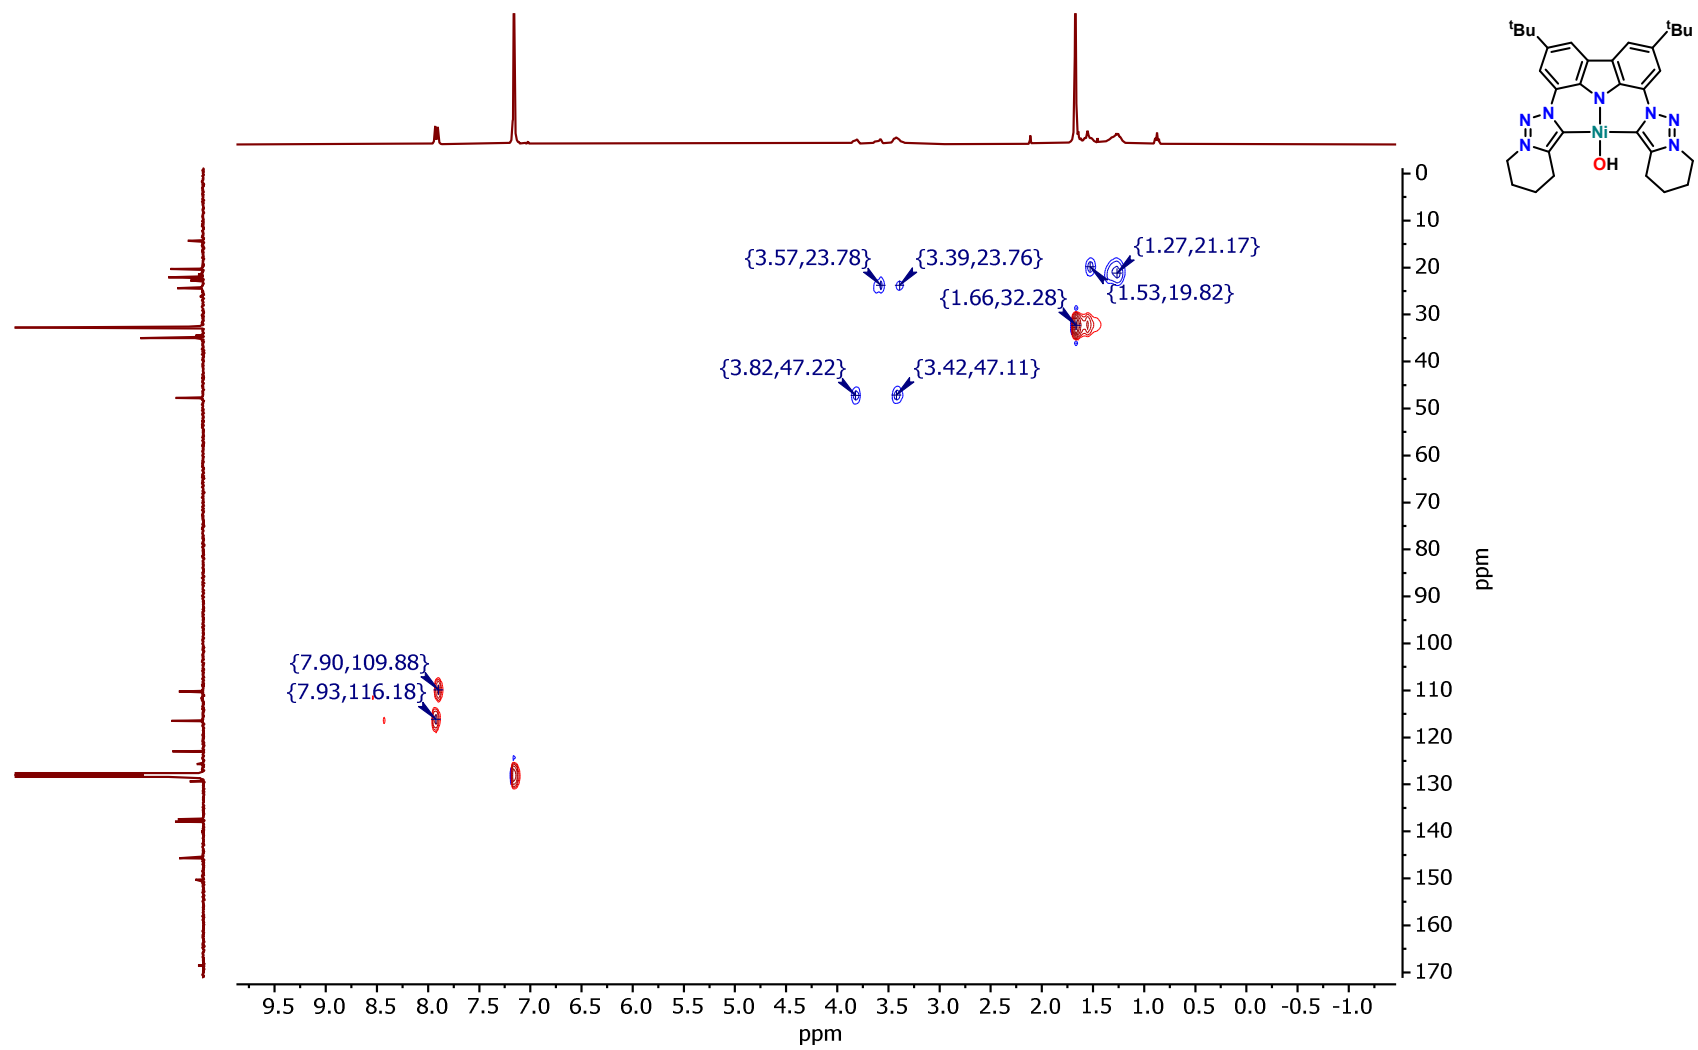

Figure S 13:  $^1\text{H}$  -  $^{13}\text{C}$  HSQC of **2** in  $\text{C}_6\text{D}_6$  at 298K.

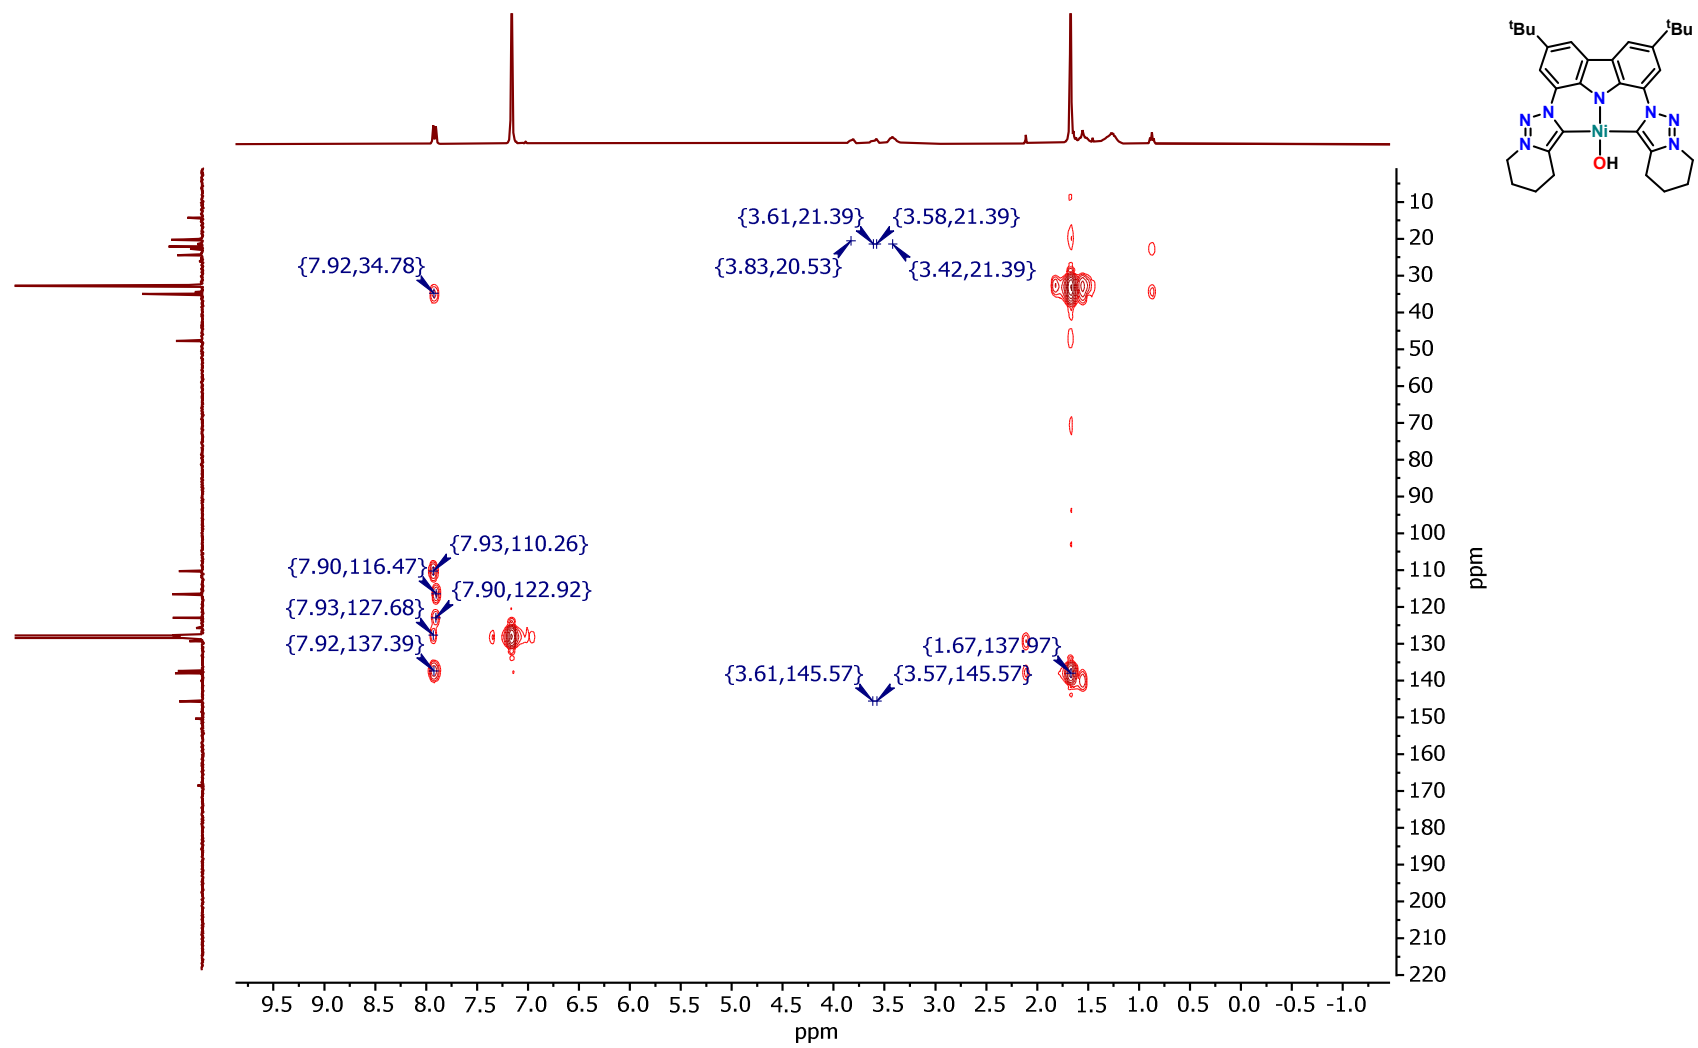

Figure S 14:  $^1\text{H}$  -  $^{13}\text{C}$  HMBC of **2** in  $\text{C}_6\text{D}_6$  at 298K.

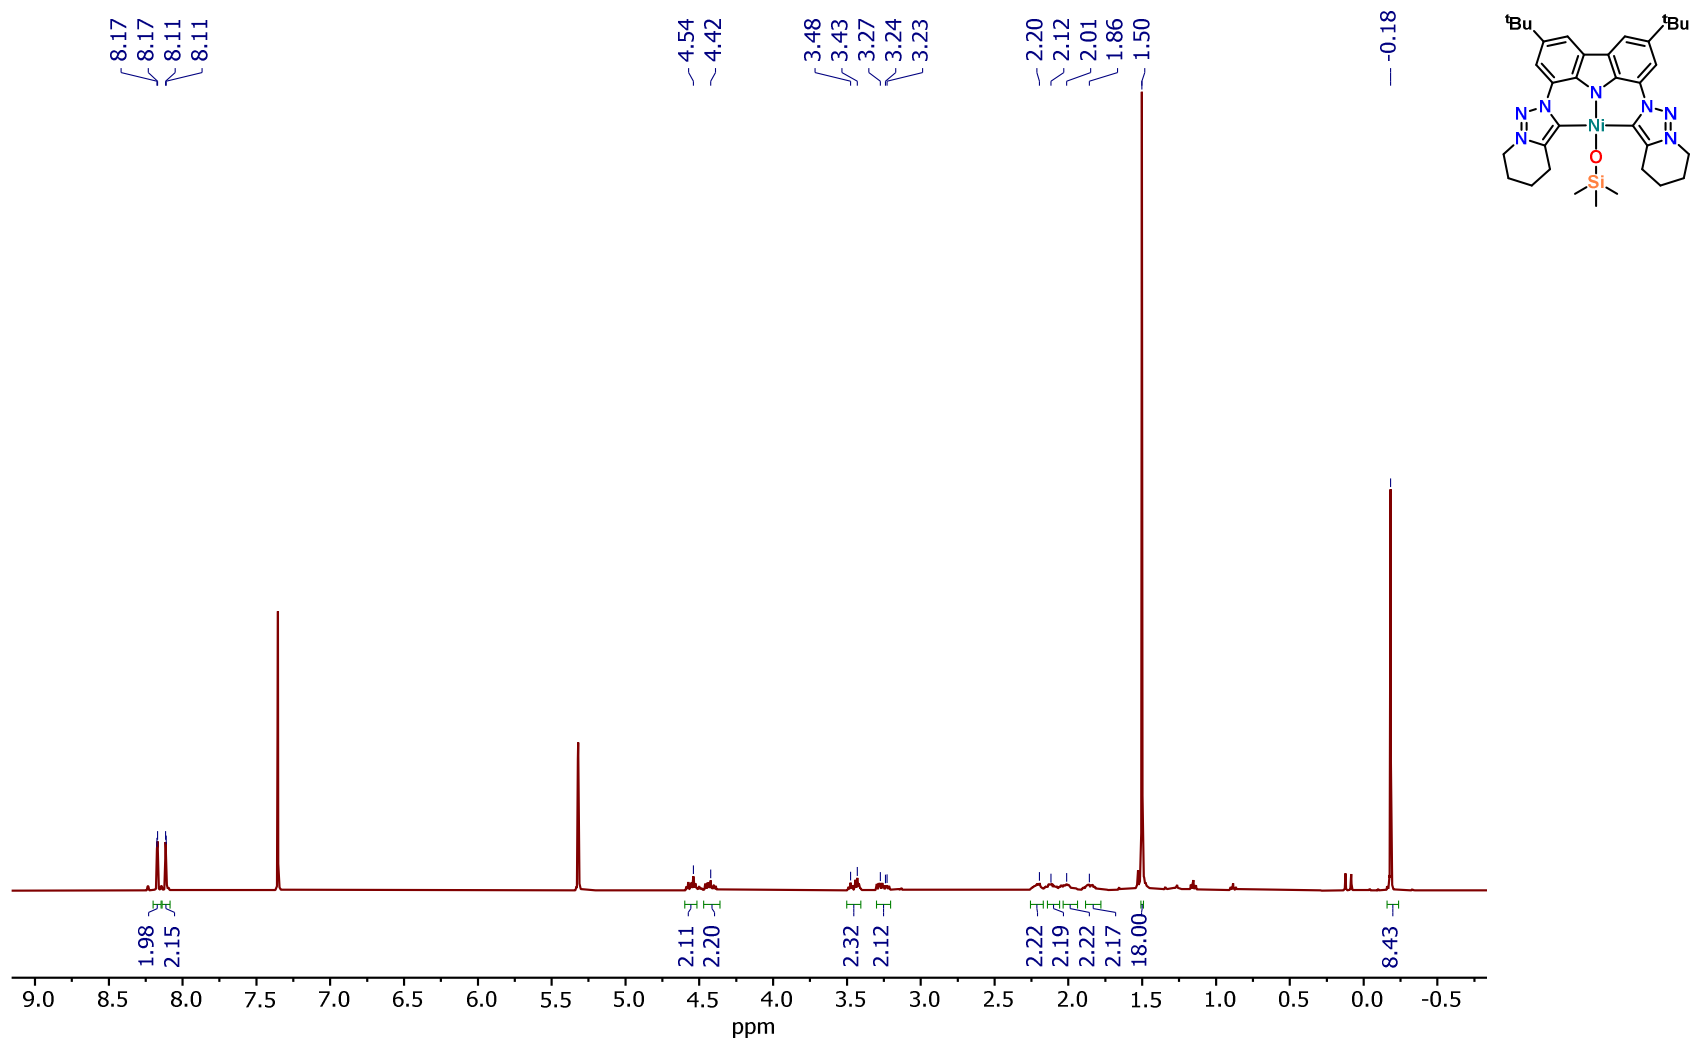

Figure S 15:  $^1\text{H}$  NMR of **3** in  $\text{CD}_2\text{Cl}_2$  at 298K.



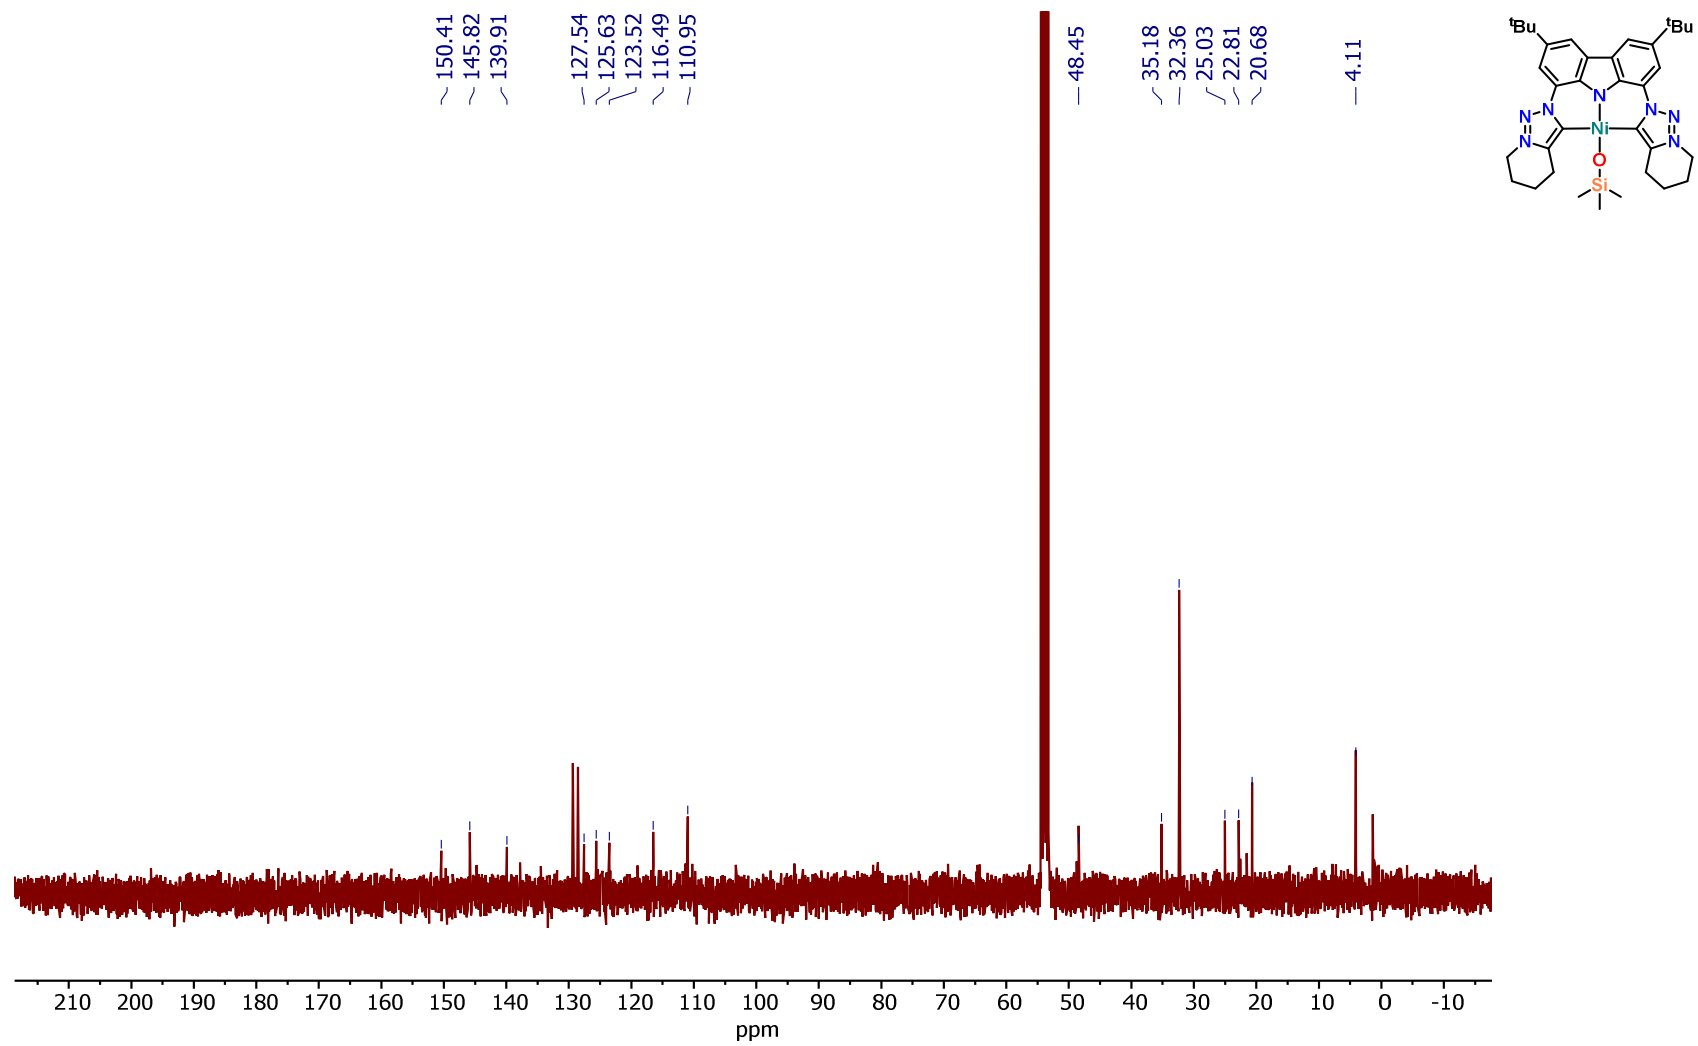

Figure S 16: <sup>13</sup>C NMR of **3** in CD<sub>2</sub>Cl<sub>2</sub> at 298K.

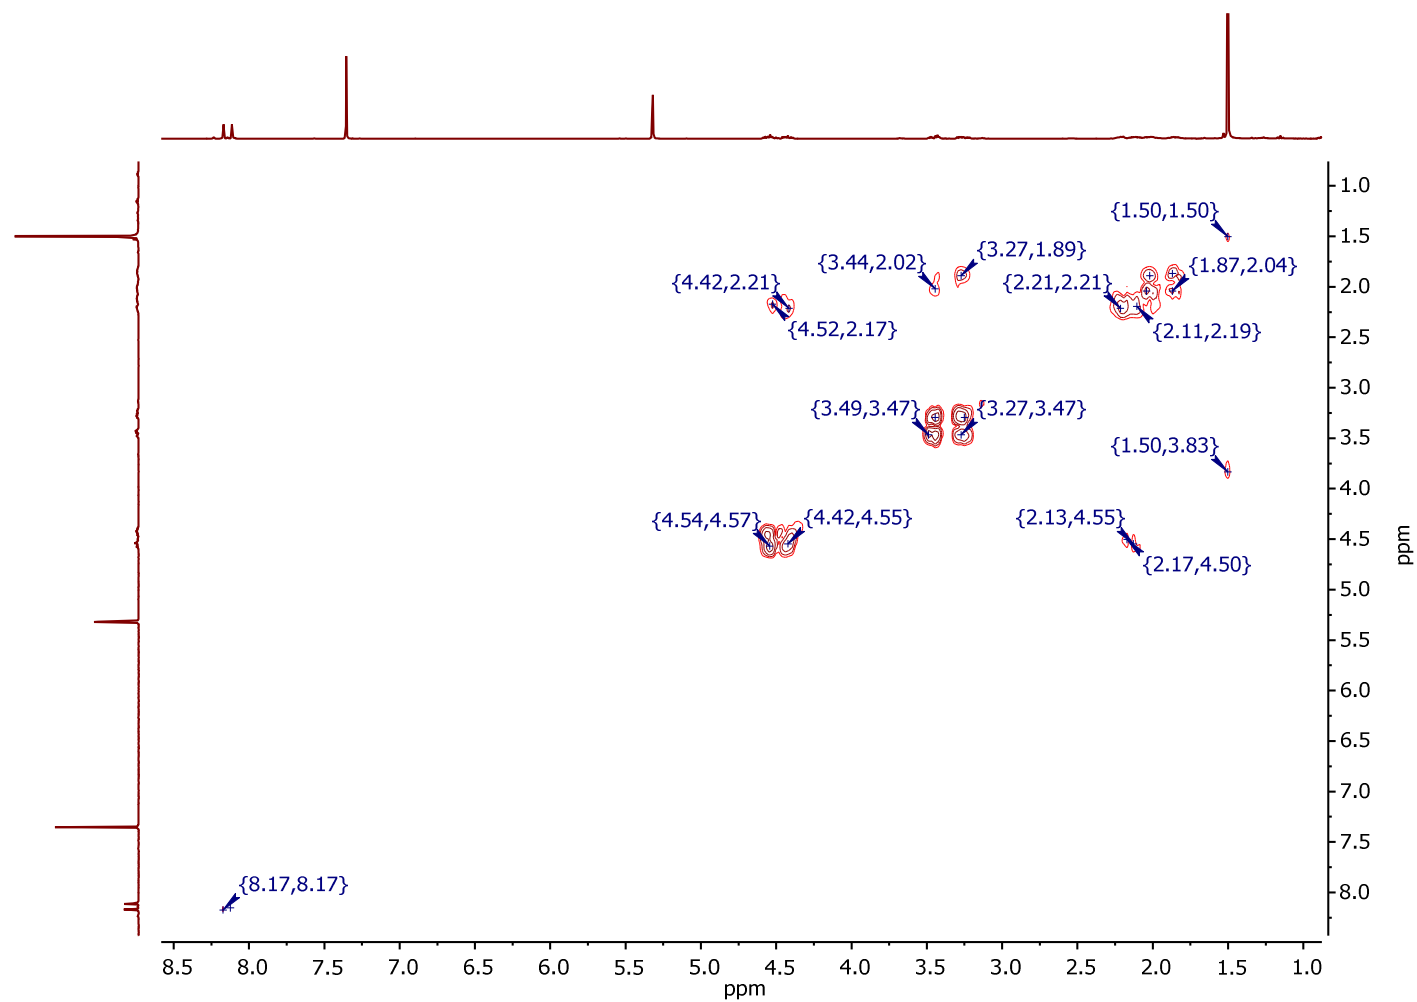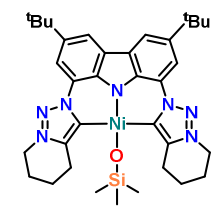

Figure S 17:  $^1\text{H} - ^1\text{H}$  COSY of **3** in  $\text{CD}_2\text{Cl}_2$  at 298K.

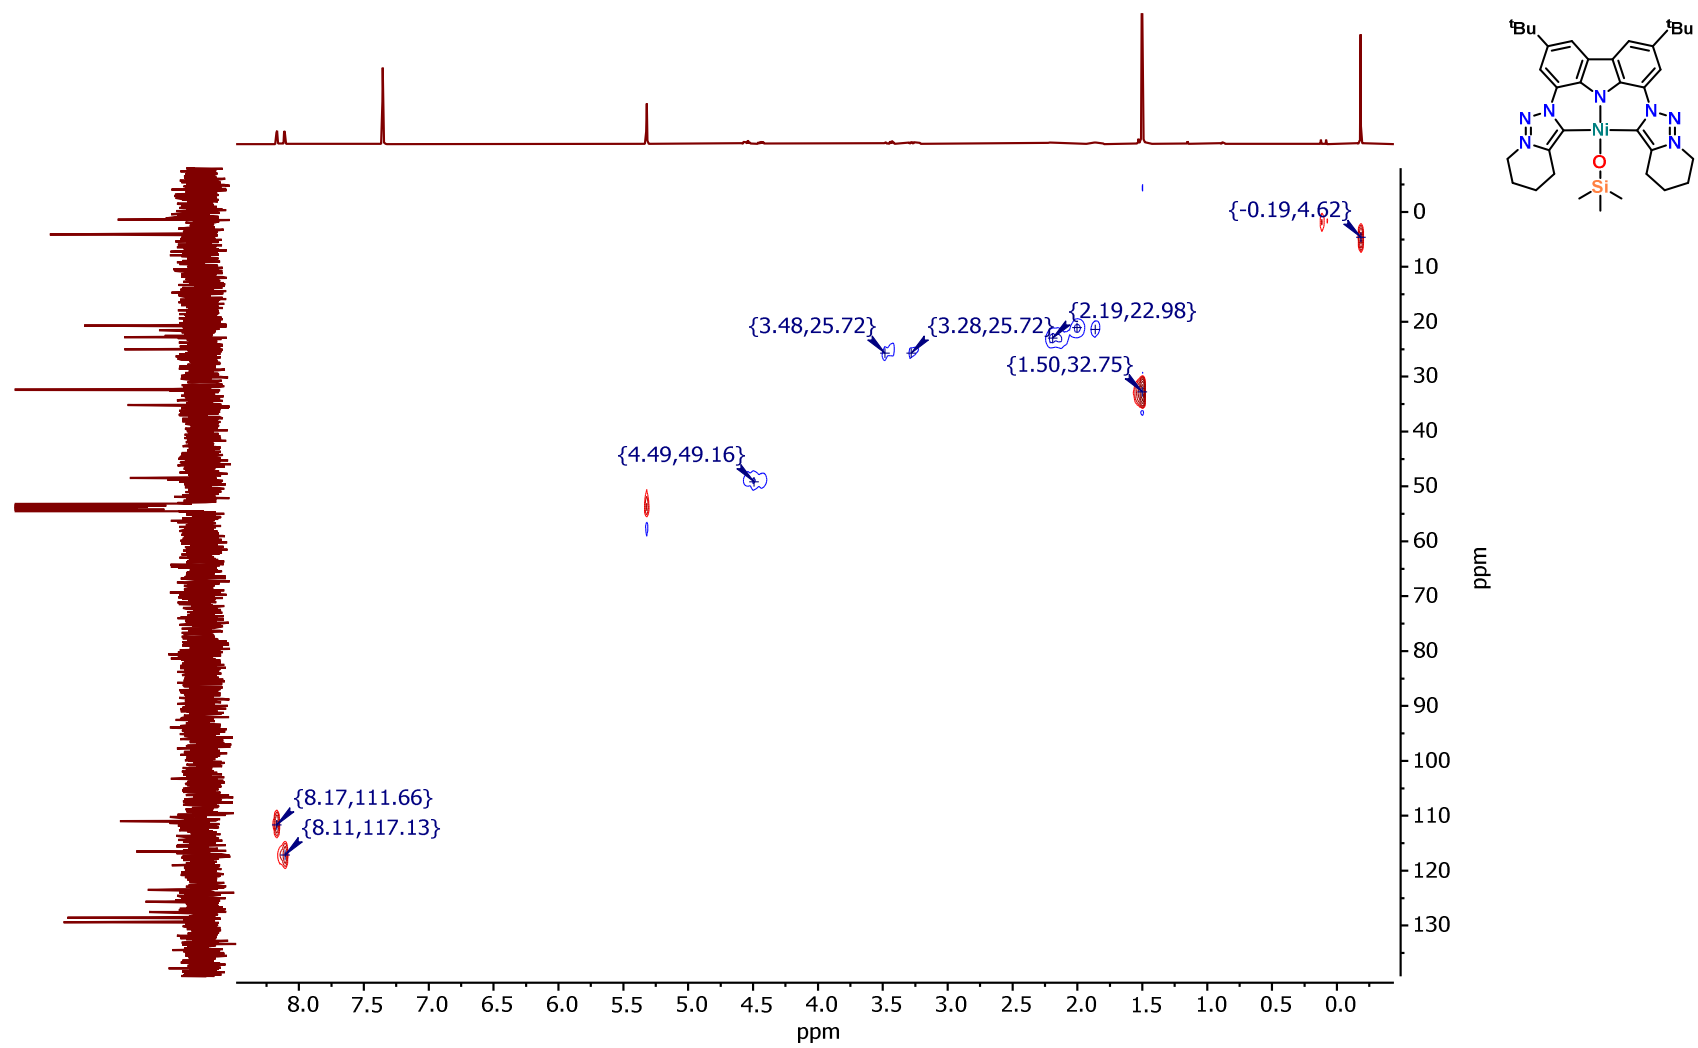

Figure S 18:  $^1\text{H} - ^{13}\text{C}$  HSQC of **3** in  $\text{CD}_2\text{Cl}_2$  at 298K.

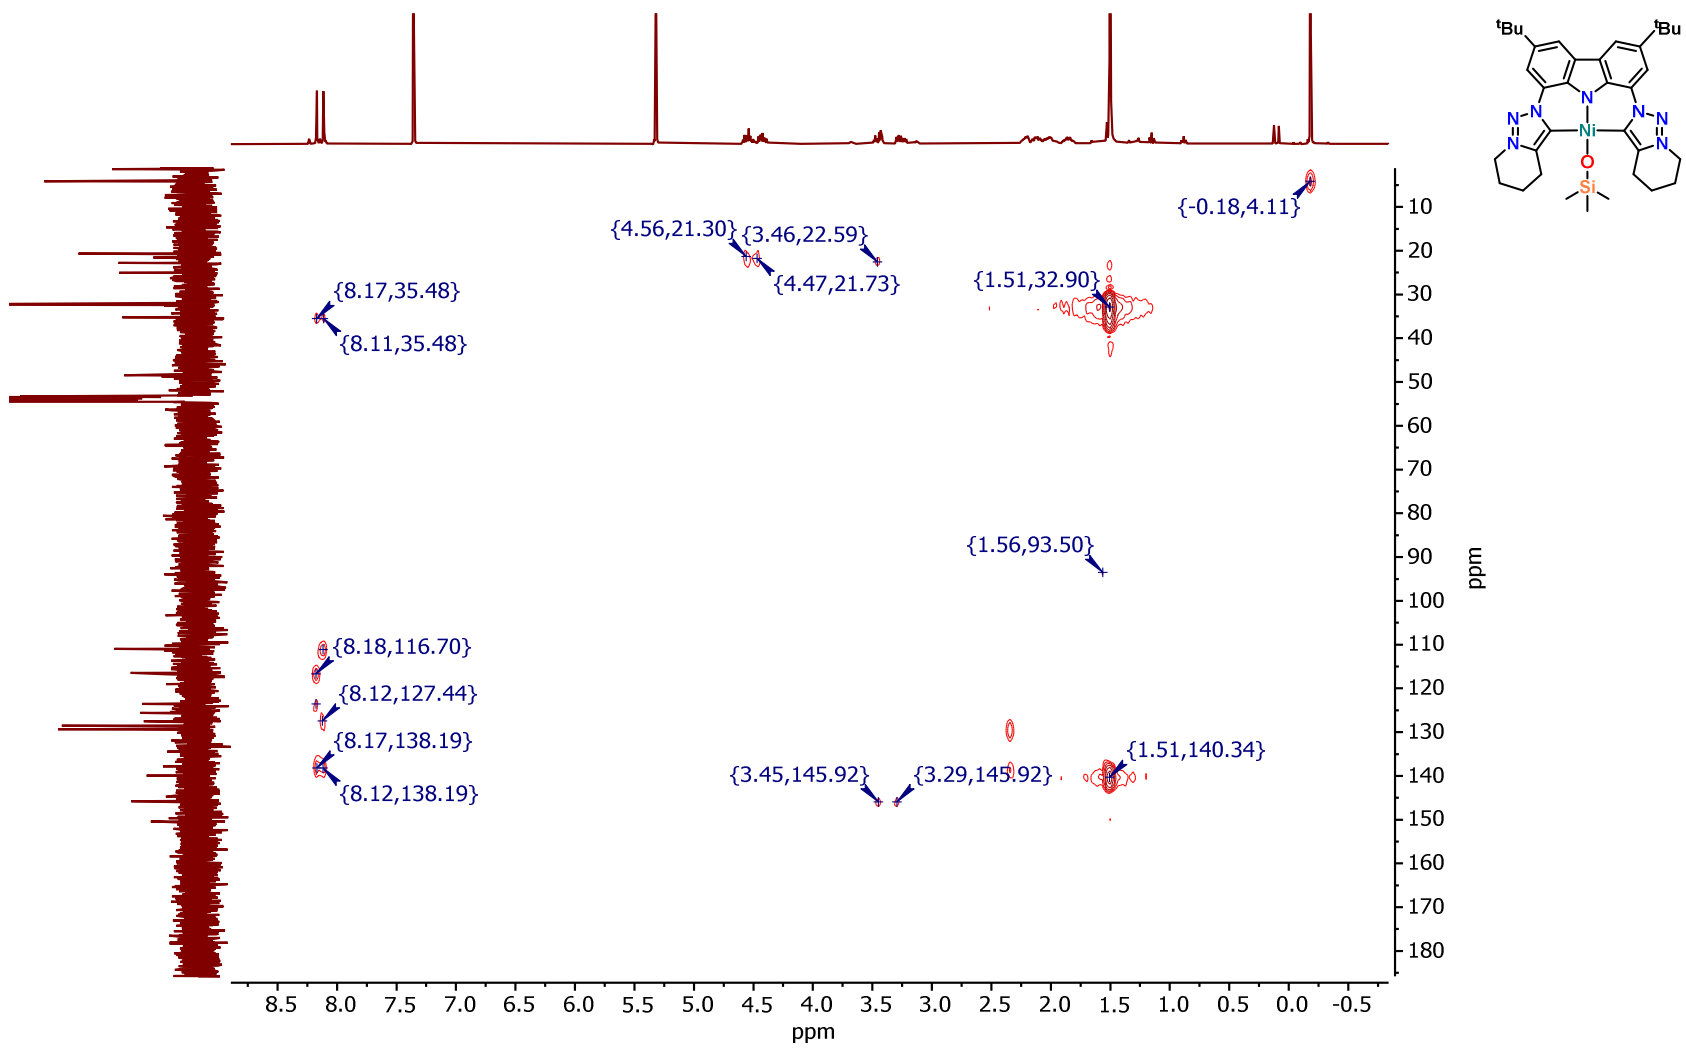

Figure S 19:  $^1\text{H}$  -  $^{13}\text{C}$  HMBC of **3** in  $\text{CD}_2\text{Cl}_2$  at 298K.

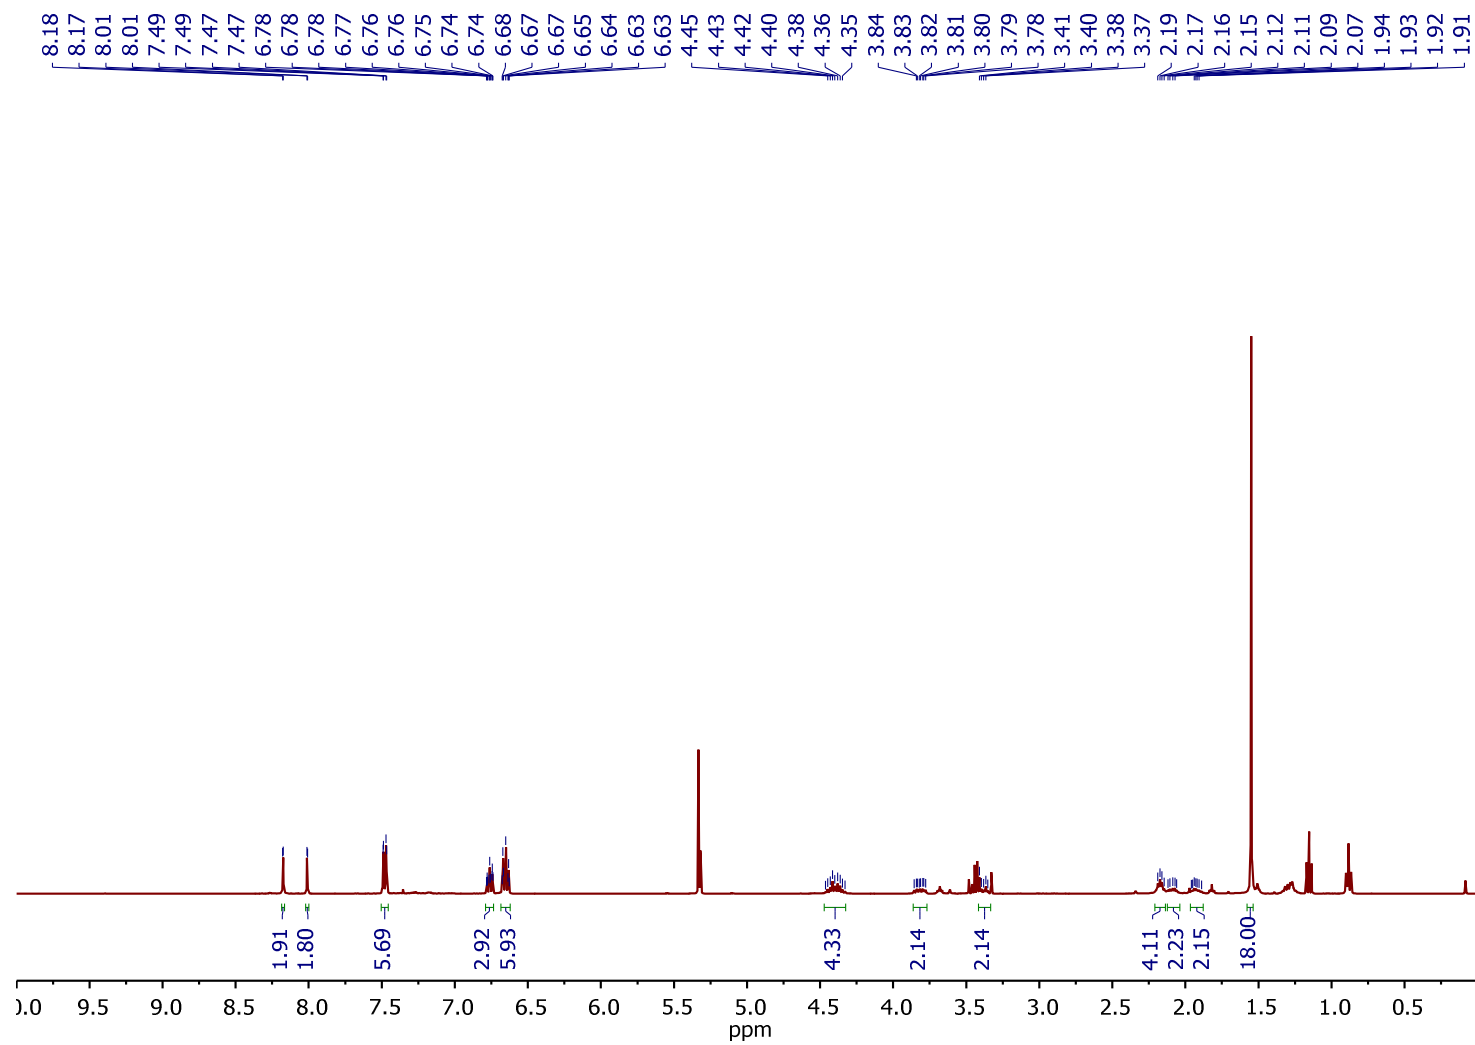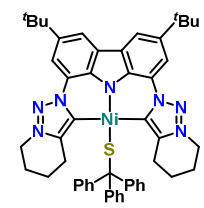

Figure S 20:  $^1\text{H}$  NMR of **4** in  $\text{CD}_2\text{Cl}_2$  at 298K

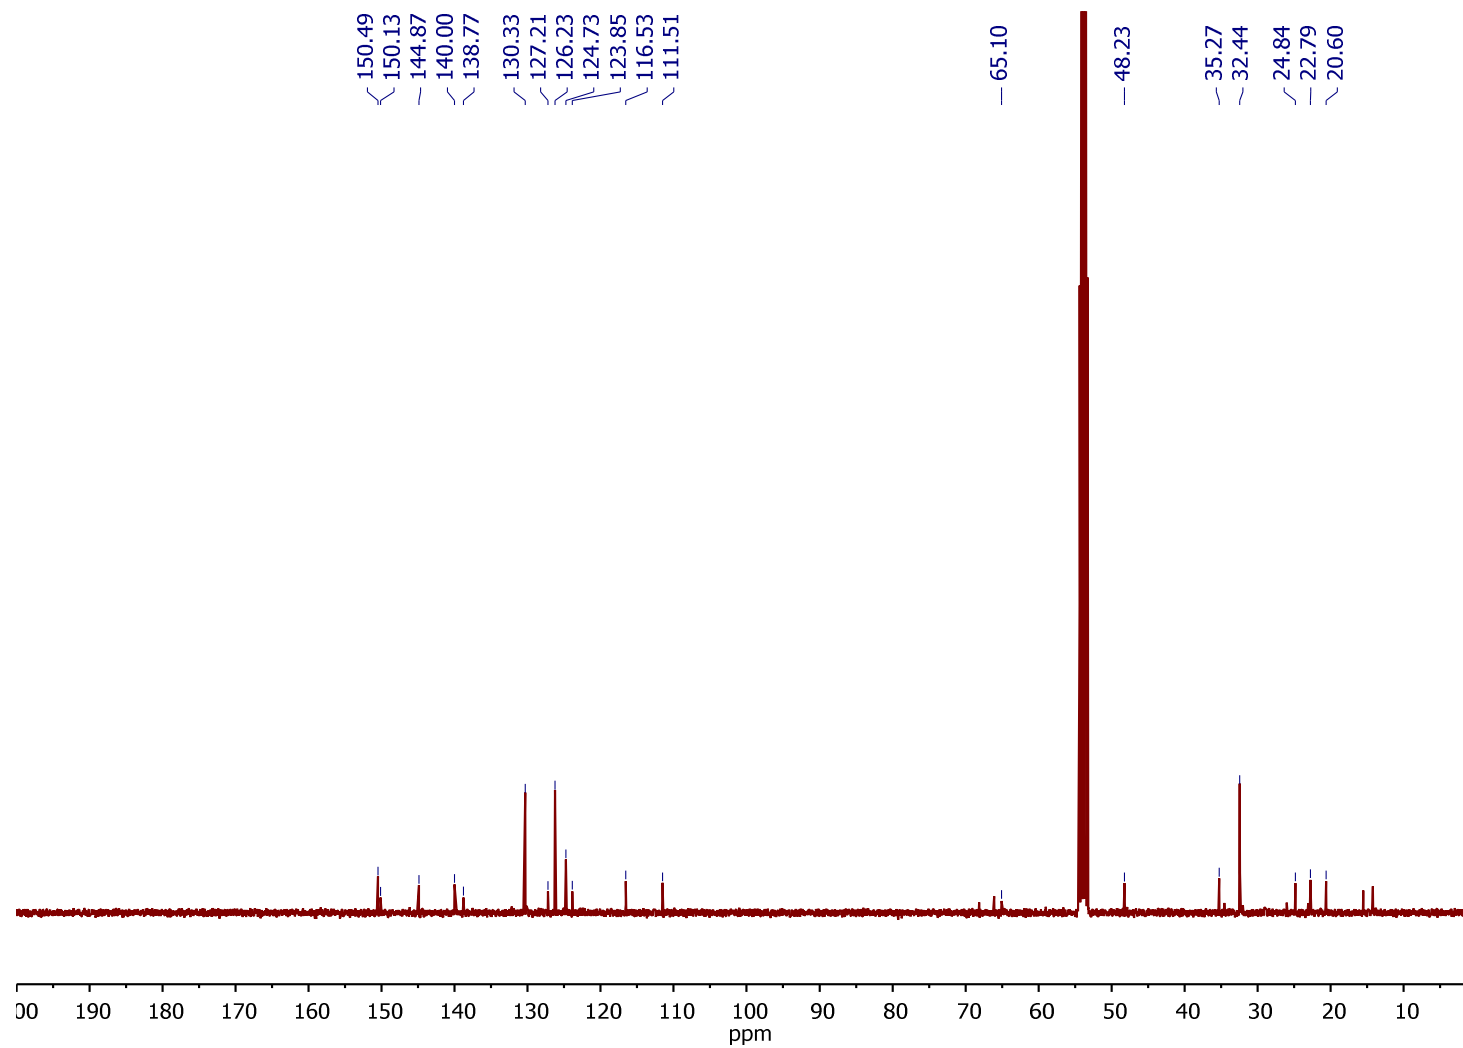

Figure S 21:  $^{13}\text{C}$  NMR of 4 in  $\text{CD}_2\text{Cl}_2$  at 298K

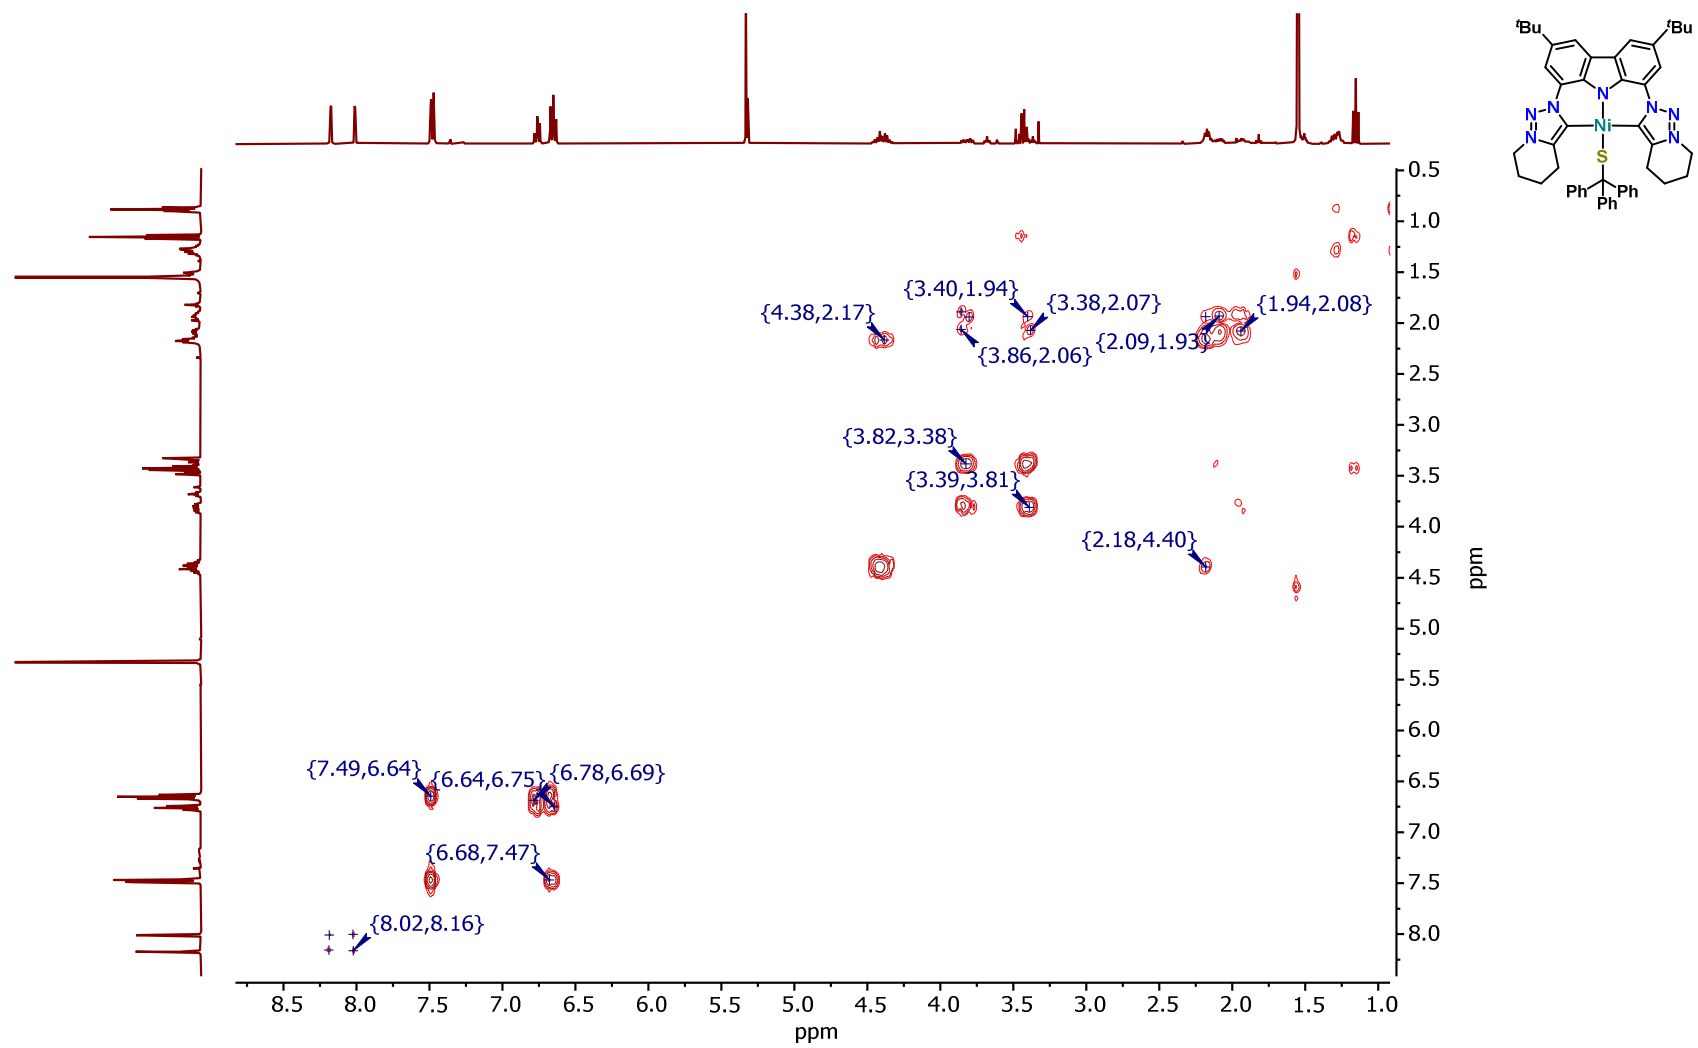

Figure S 22:  $^1\text{H}-^1\text{H}$  COSY of **4** in  $\text{CD}_2\text{Cl}_2$  at 298K.

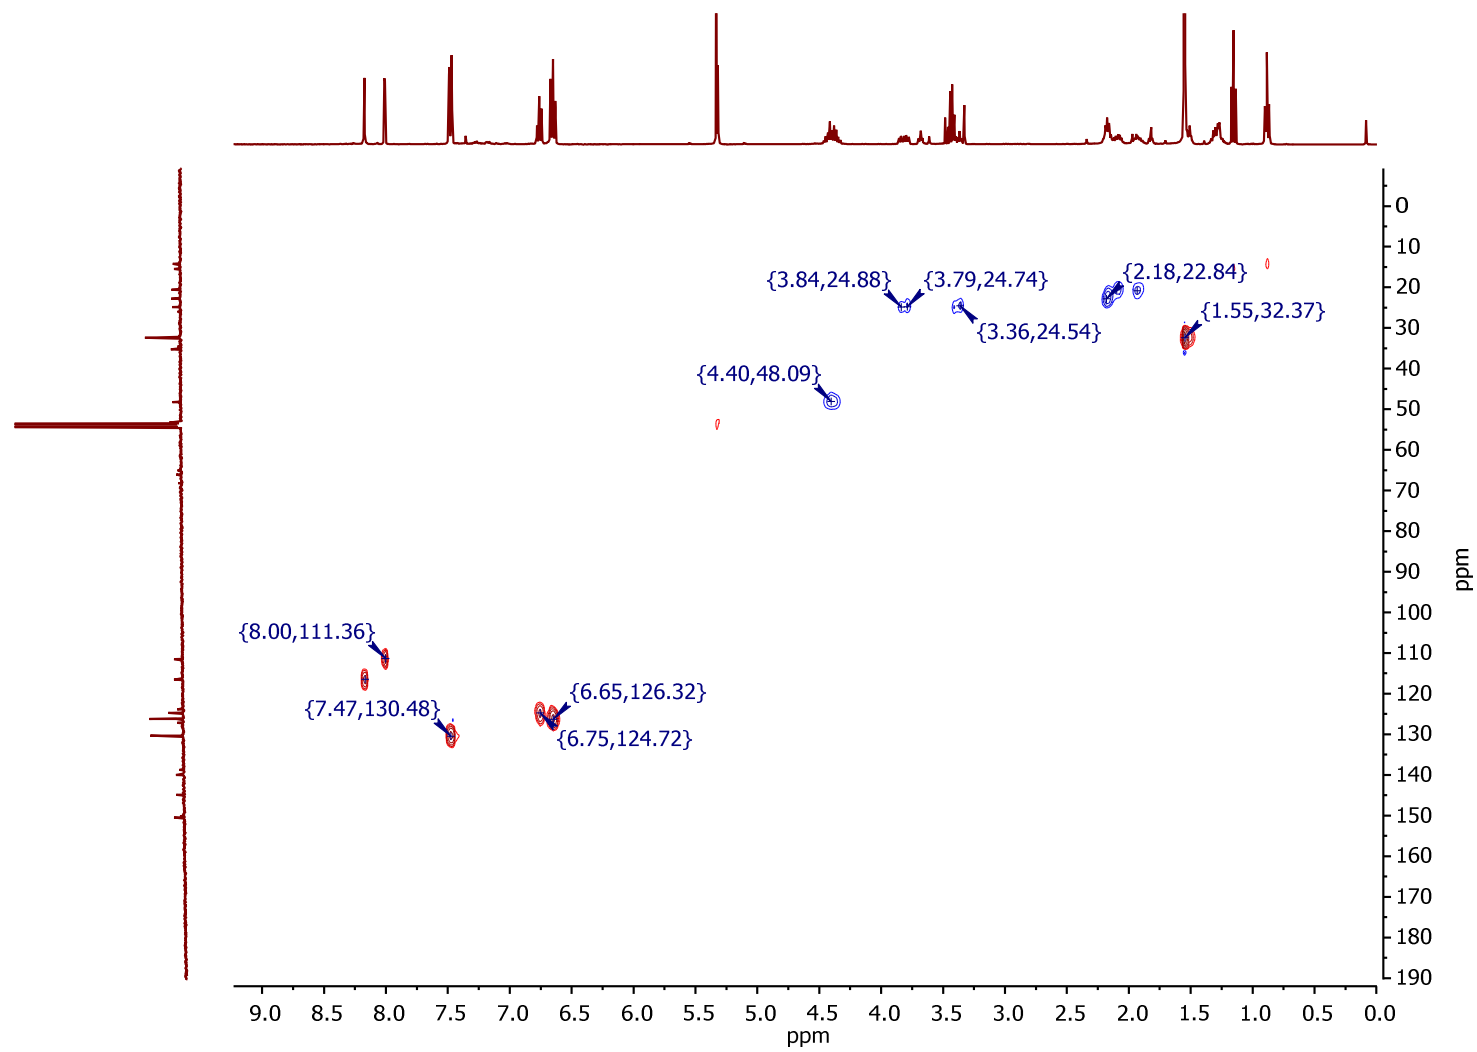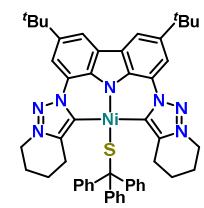

Figure S 23:  $^1\text{H} - ^{13}\text{C}$  HSQC of **4** at 298K.



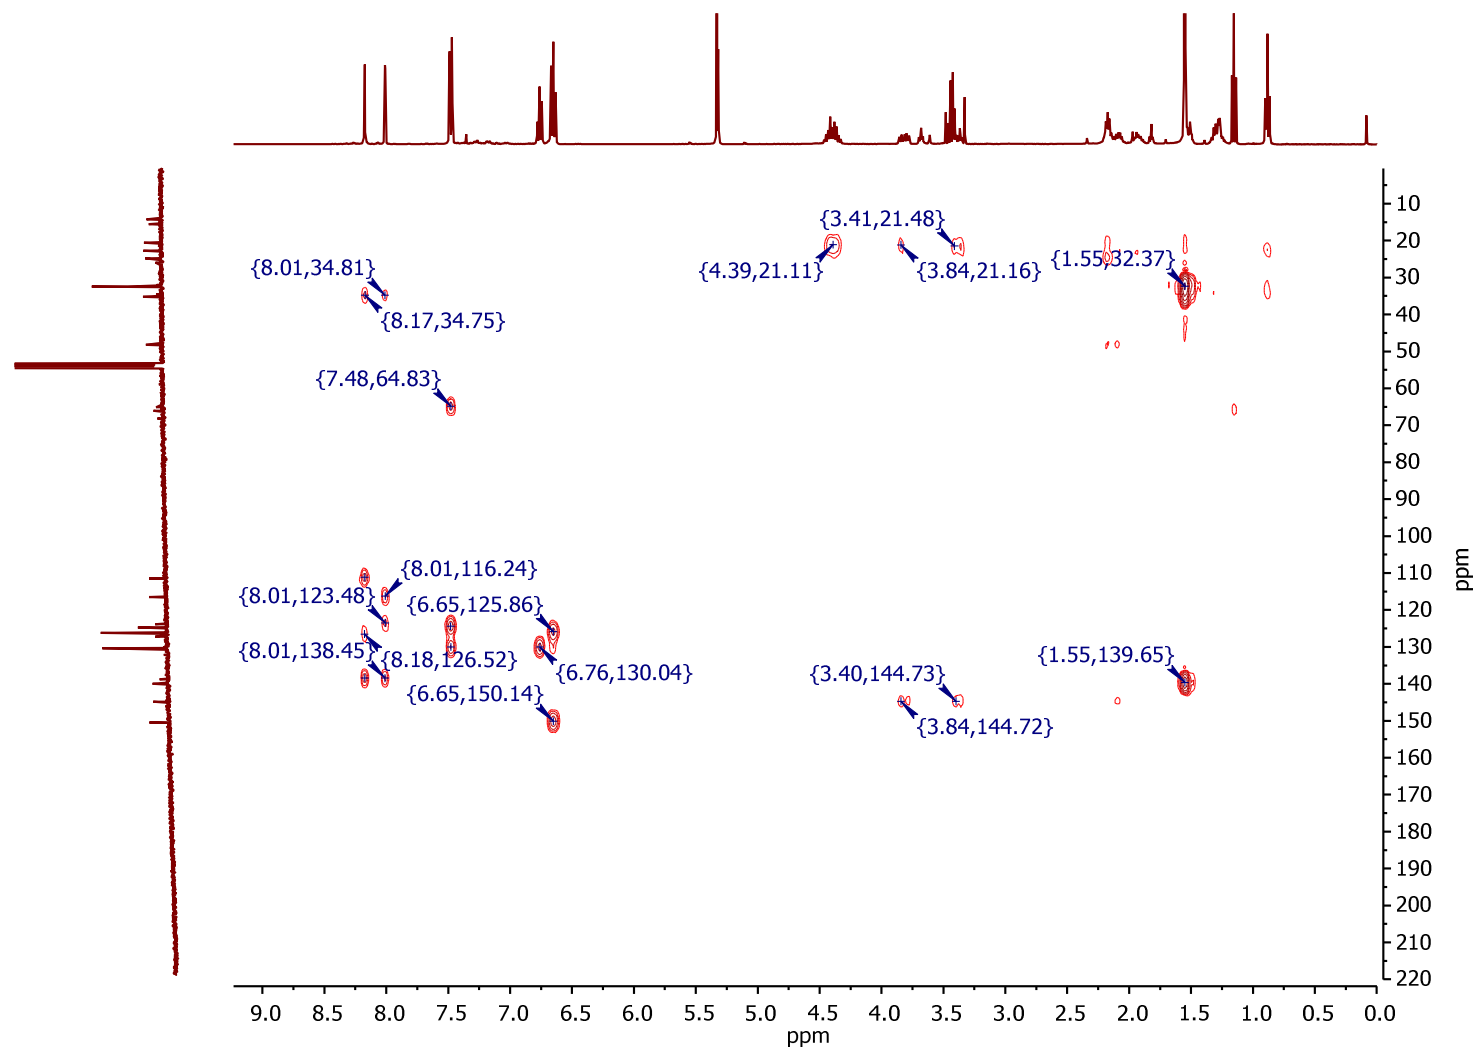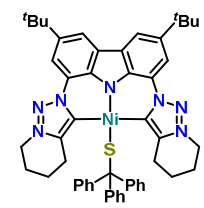

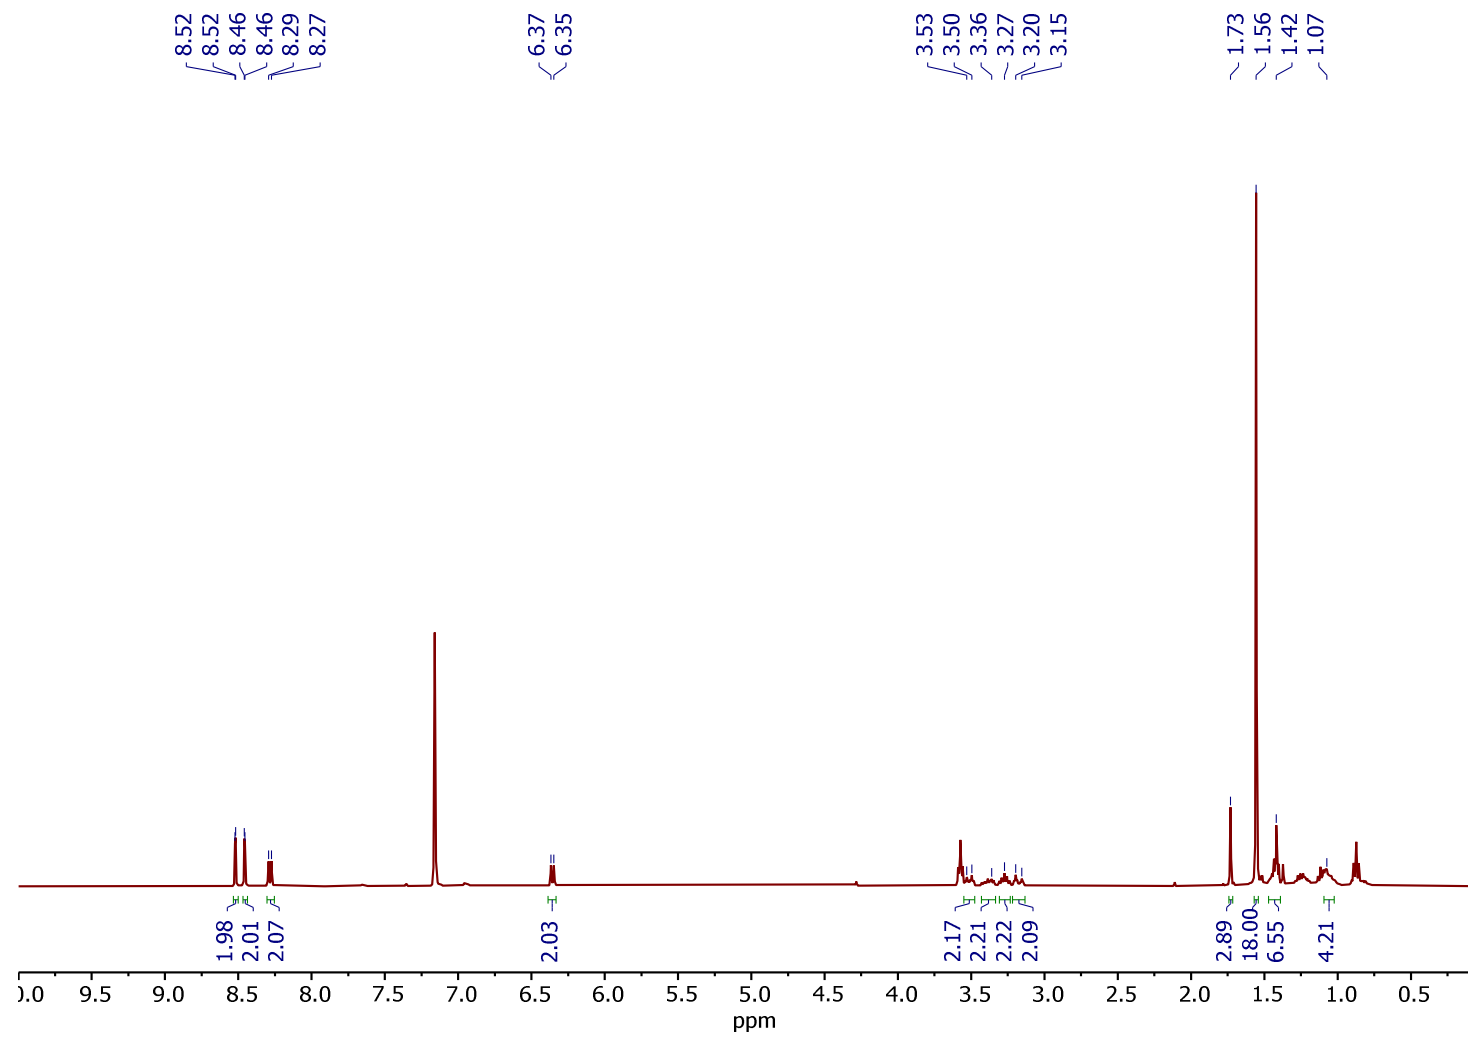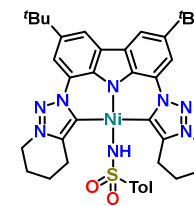

Figure S 25:  $^1\text{H}$  NMR of **5** in  $\text{C}_6\text{D}_6$  at 298K.

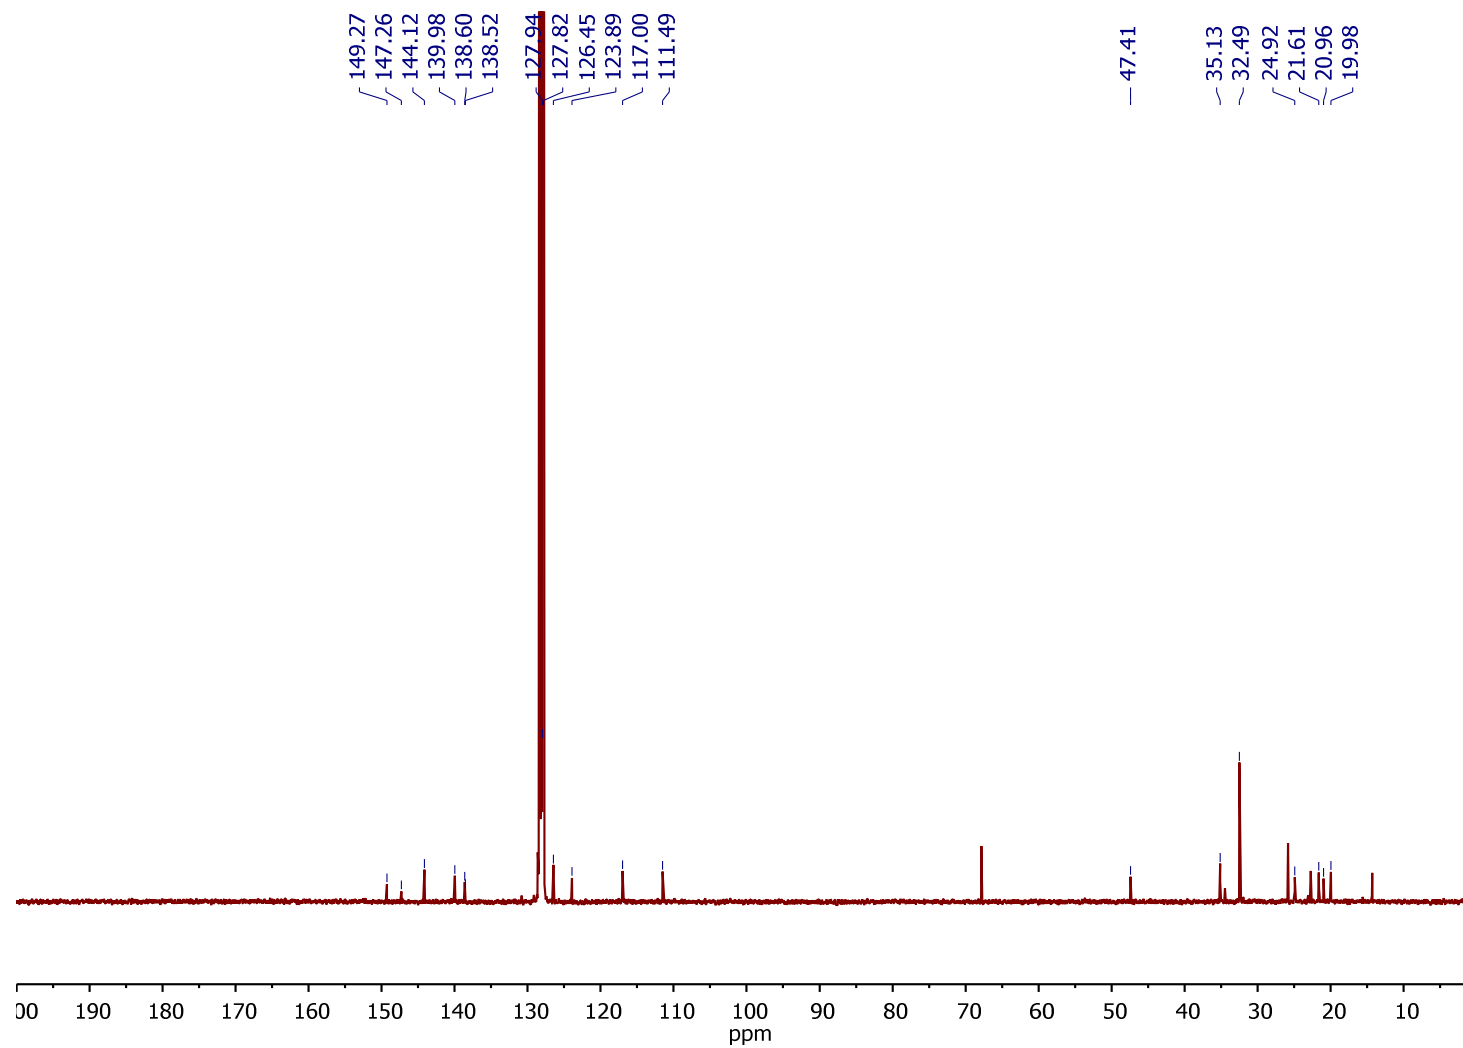

Figure S 26:  $^{13}\text{C}$  NMR of 5 in  $\text{C}_6\text{D}_6$  at 298K.

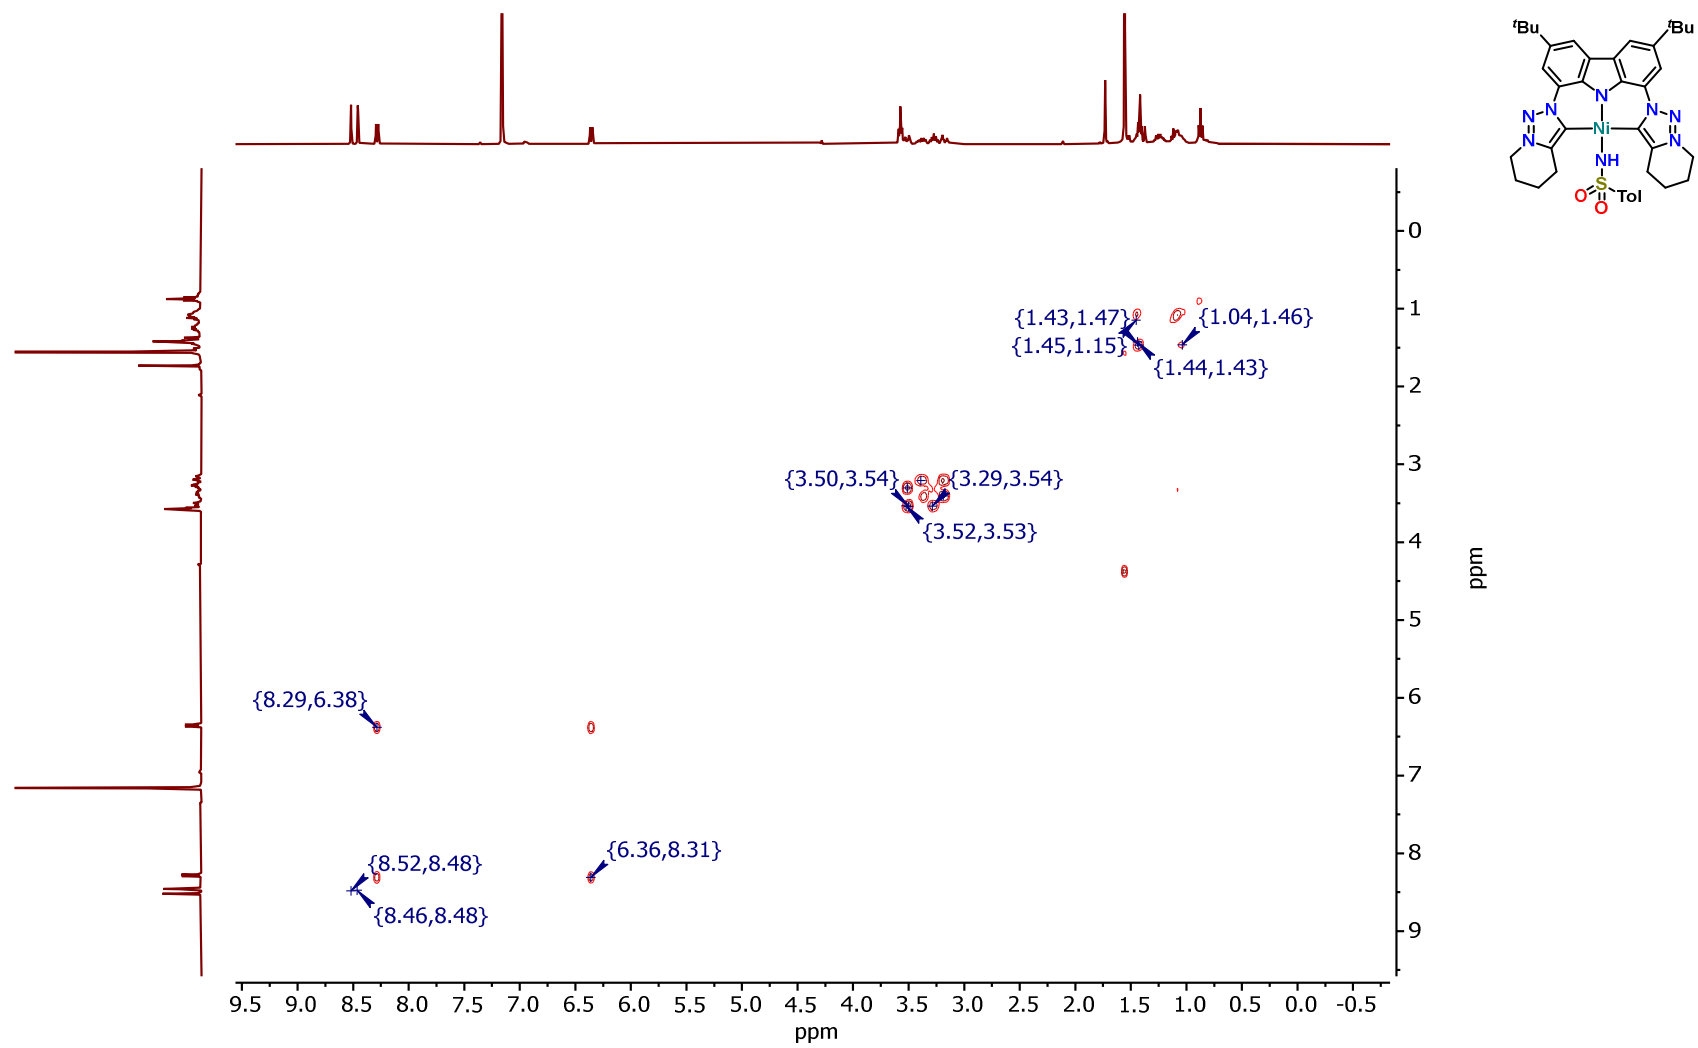

Figure S 27:  $^1\text{H} - ^1\text{H}$  COSY of **5** in  $\text{C}_6\text{D}_6$  at 298K.

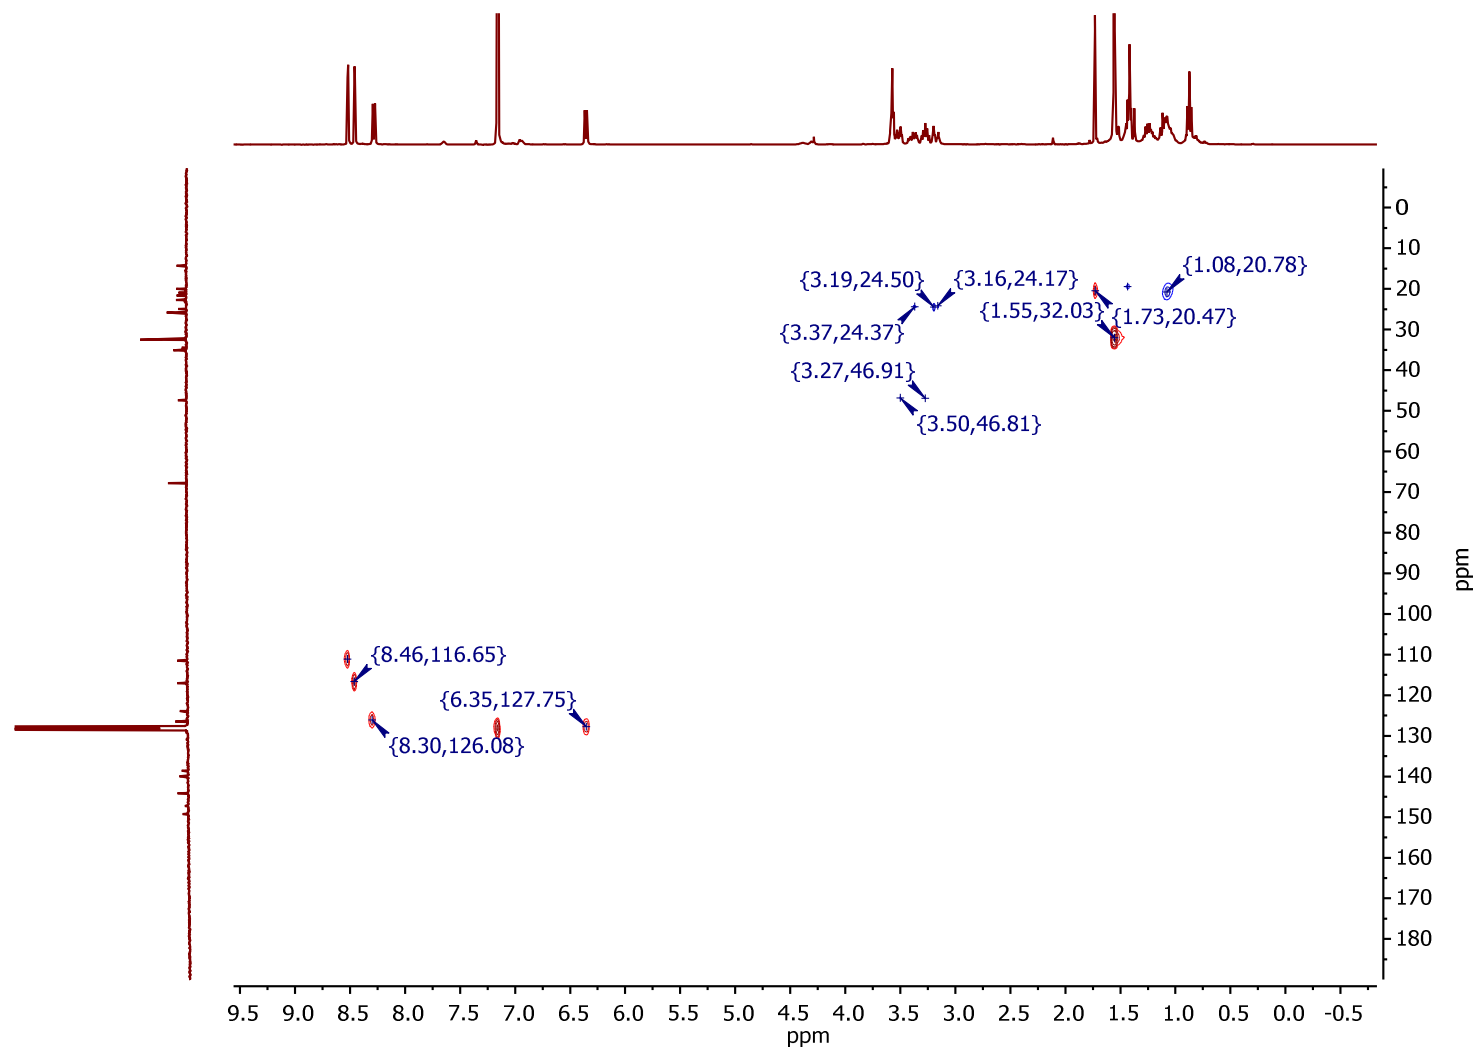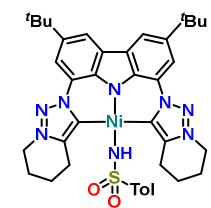

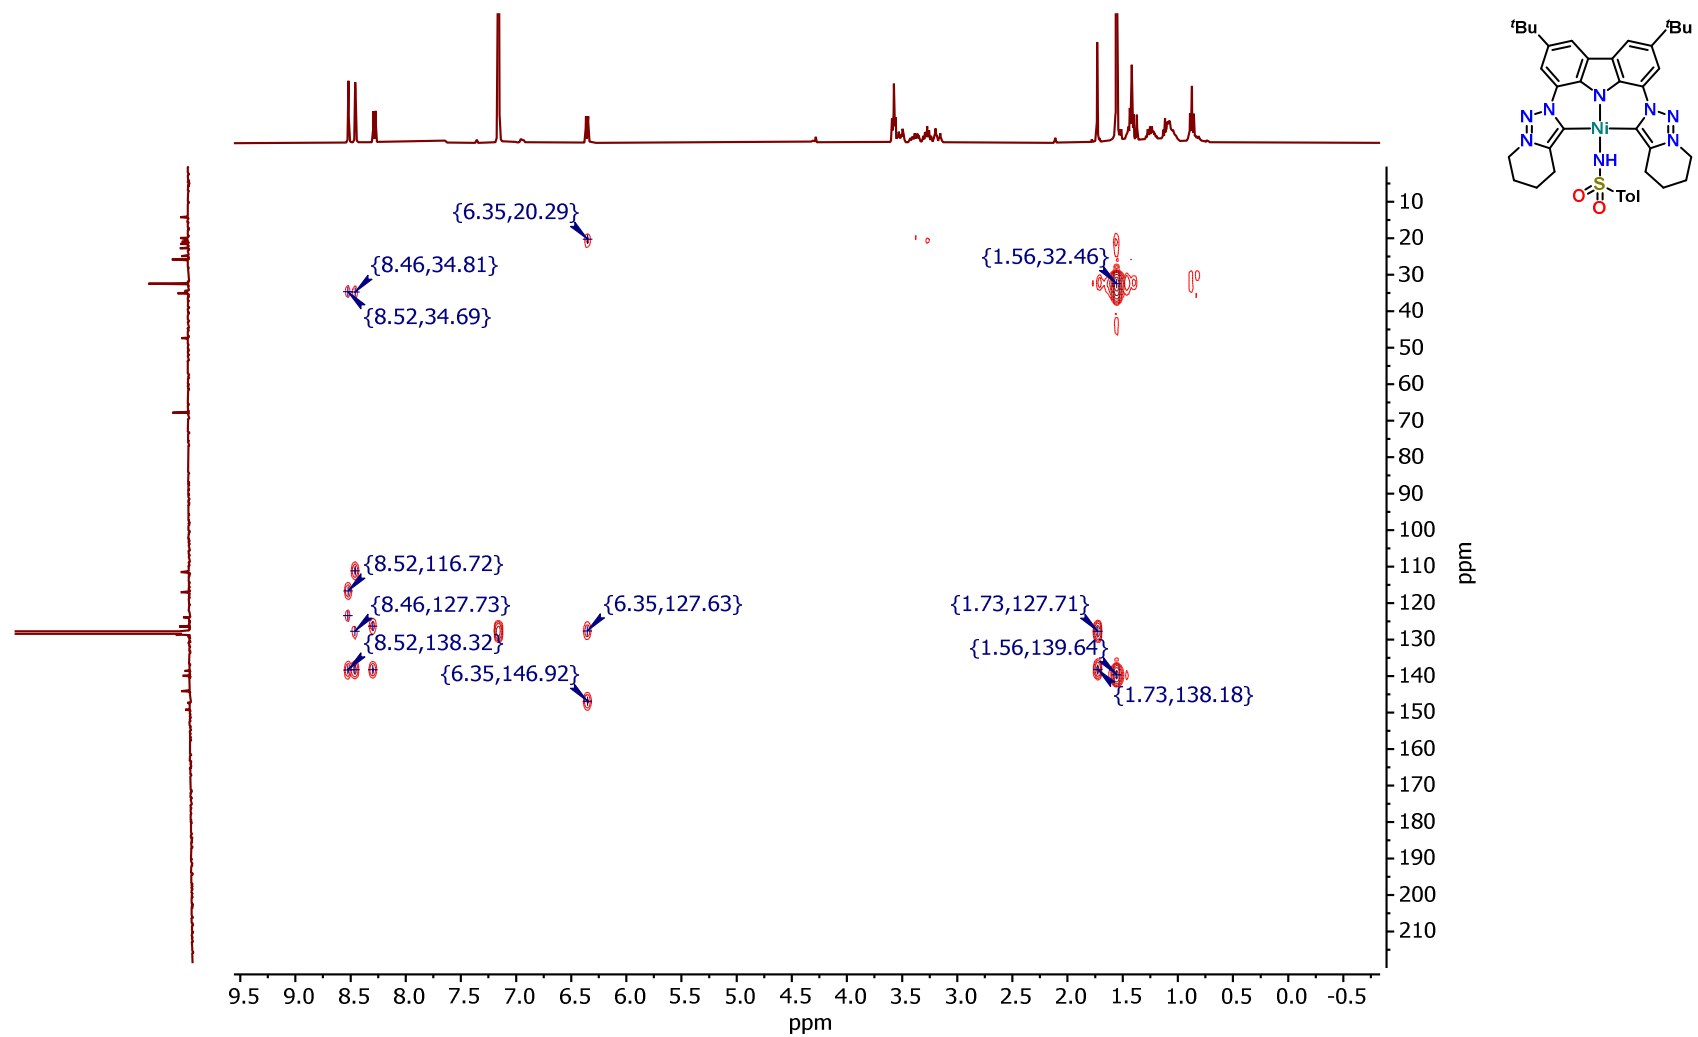

Figure S 29:  $^1\text{H}$  -  $^{13}\text{C}$  HMBC of **5** in  $\text{C}_6\text{D}_6$  at 298K.

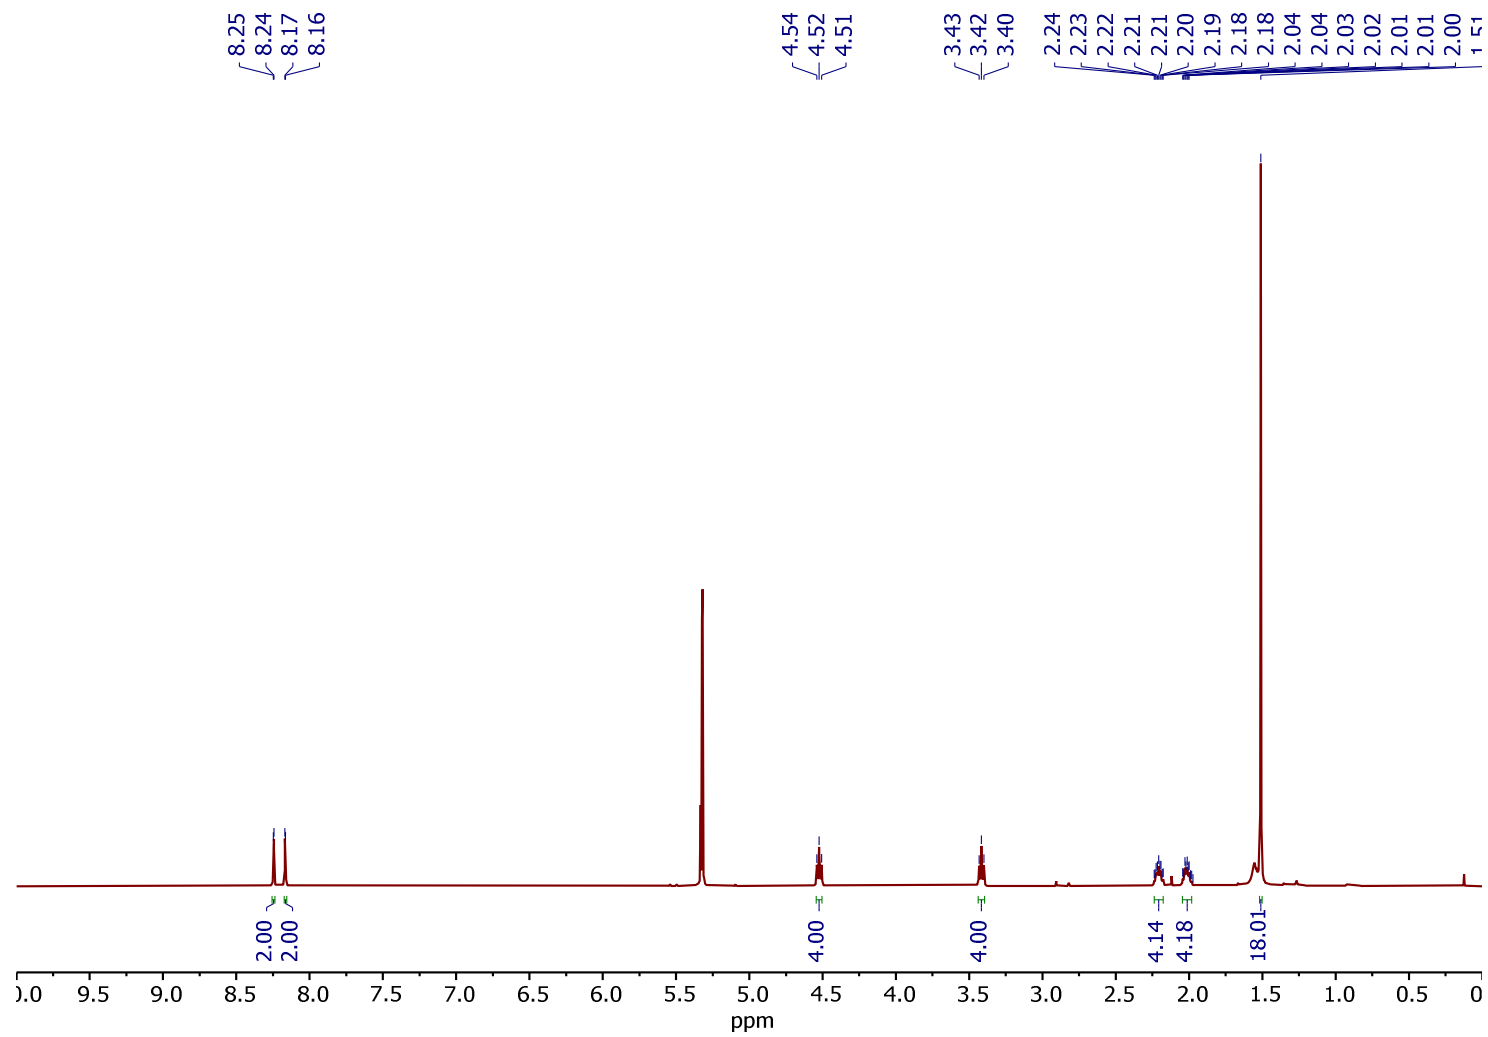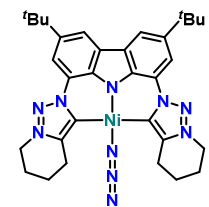

Figure S 30:  $^1\text{H}$  NMR of **6** in  $\text{CD}_2\text{Cl}_2$  at 298K.

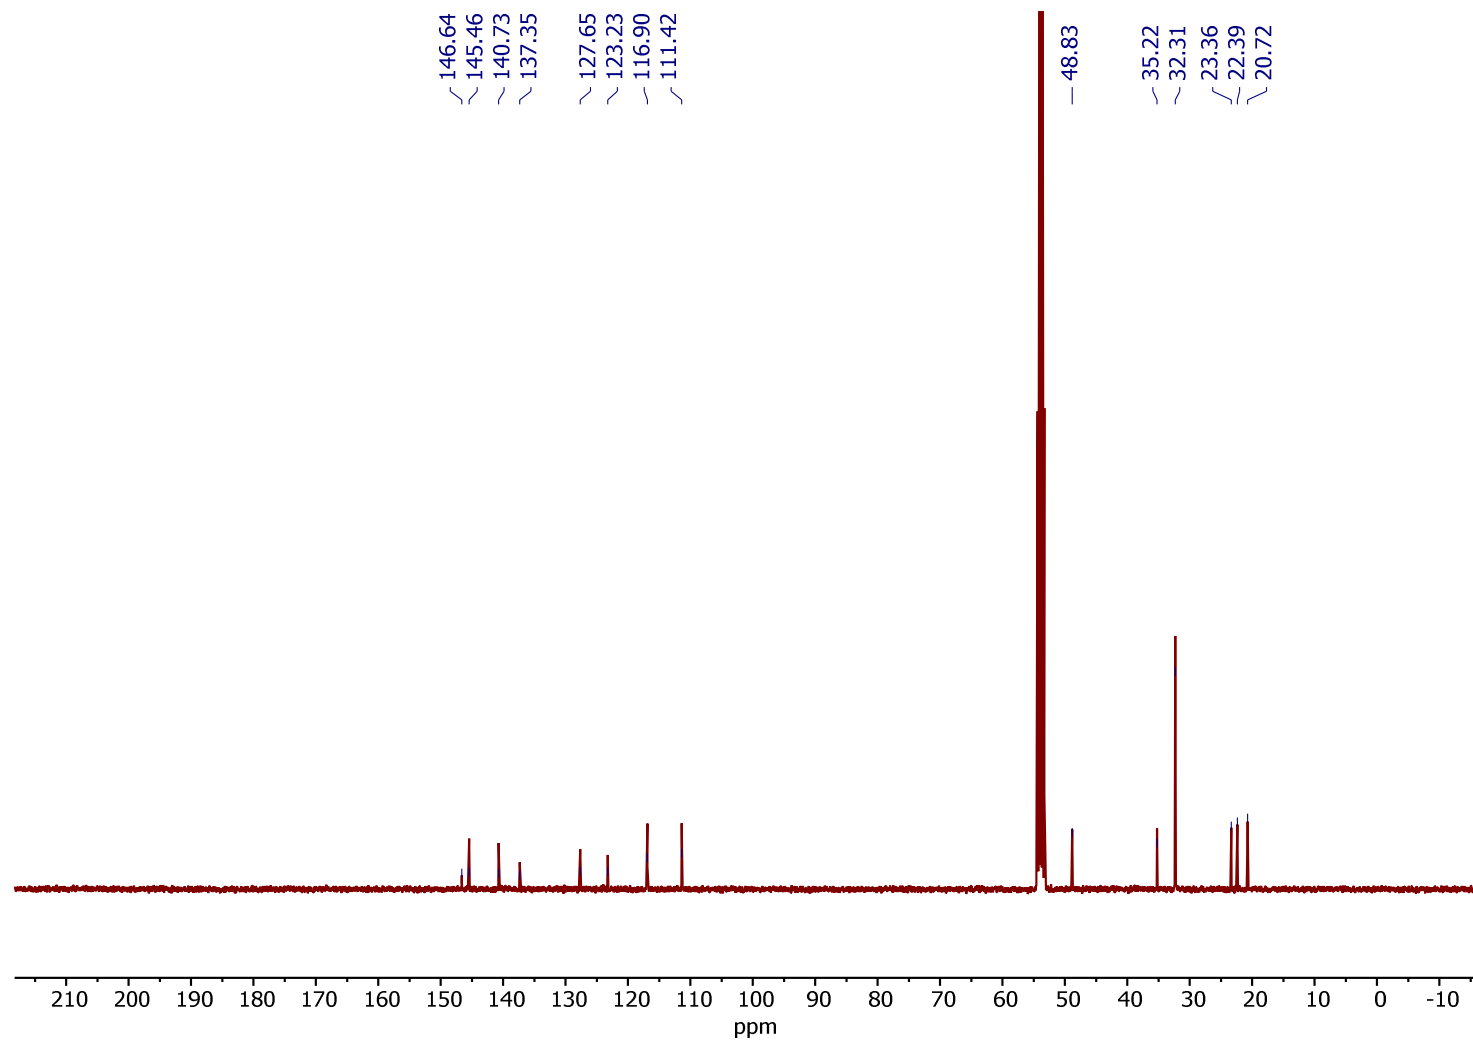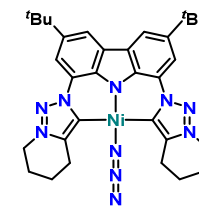

Figure S 31:  $^{13}\text{C}$  NMR of **6** in  $\text{CD}_2\text{Cl}_2$  at 298K.



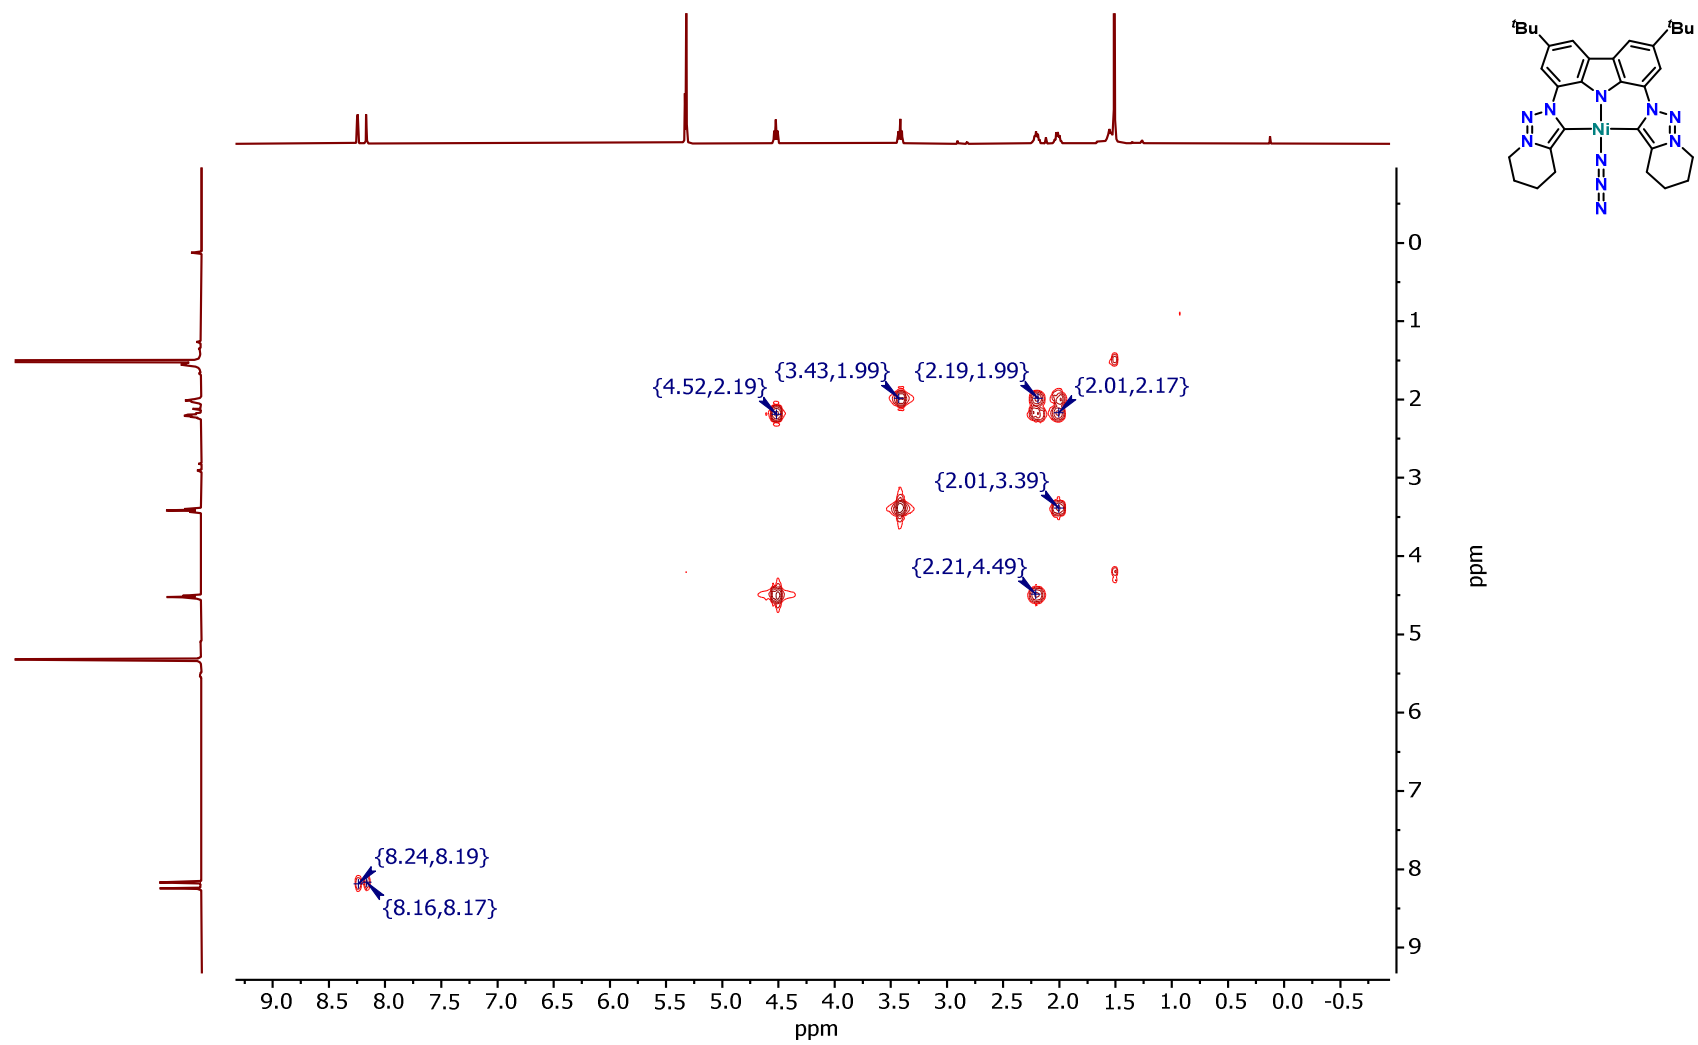

Figure S 32:  $^1\text{H} - ^1\text{H}$  COSY of **6** in  $\text{CD}_2\text{Cl}_2$  at 298K.

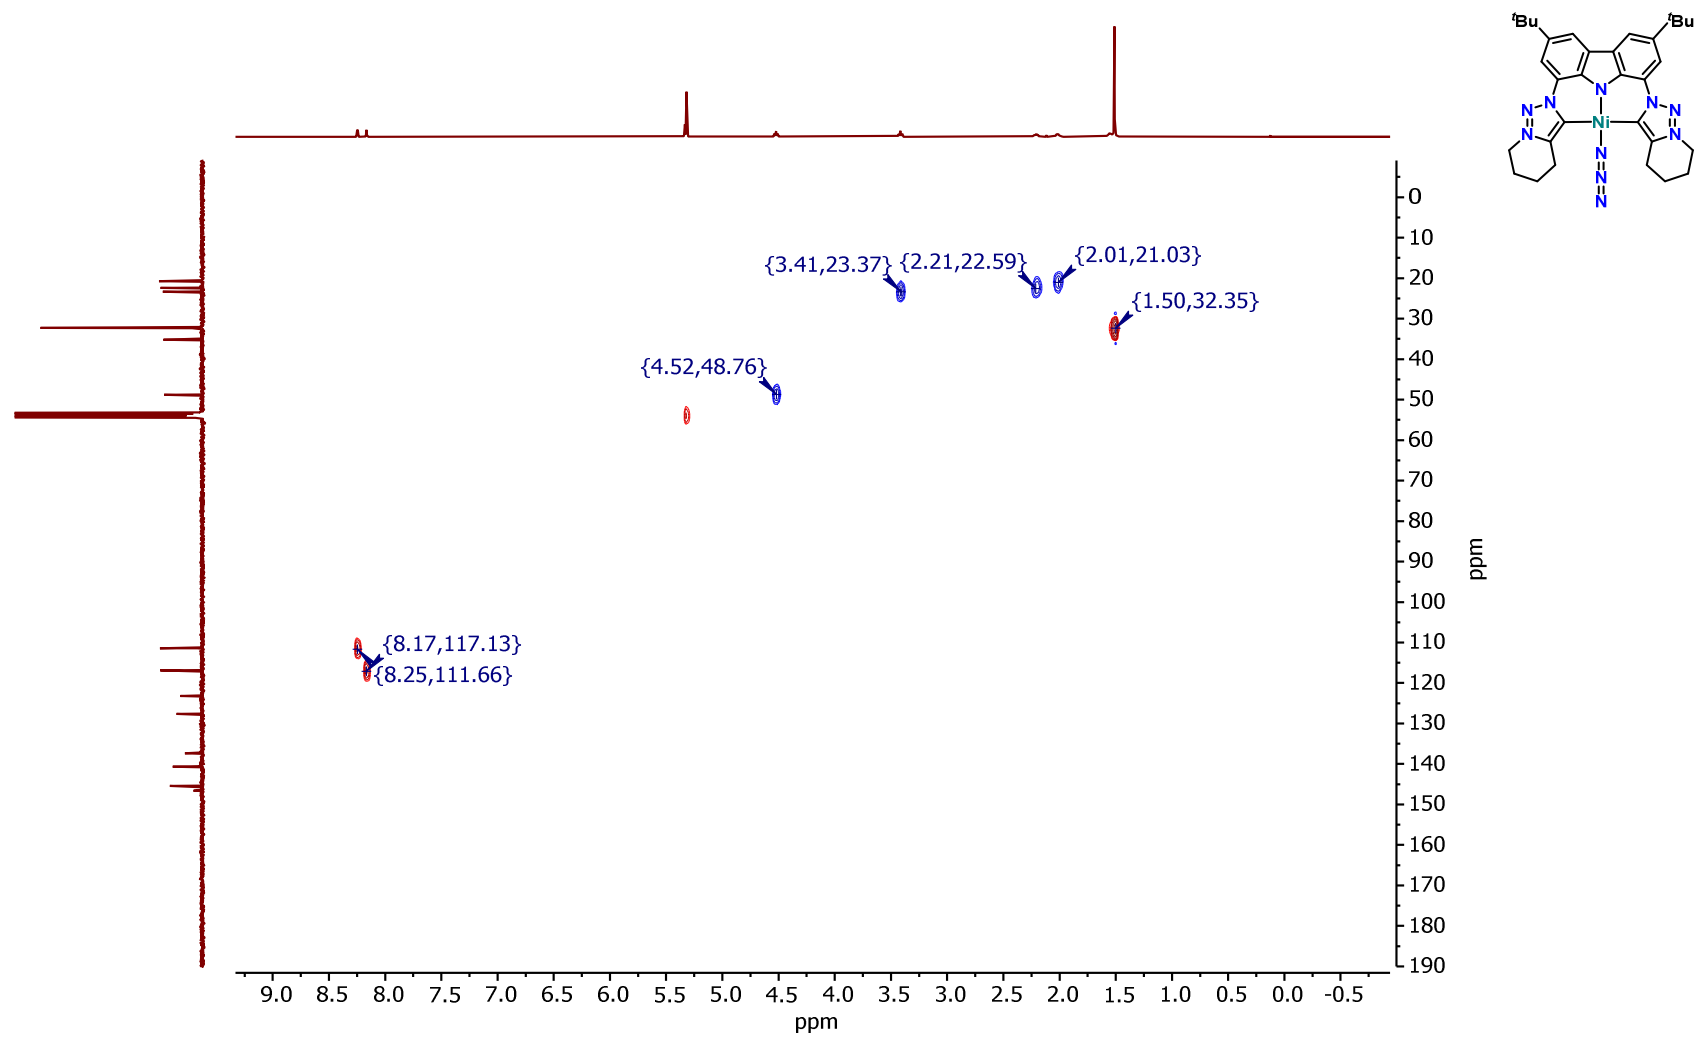

Figure S 33:  $^1\text{H}$  -  $^{13}\text{C}$  HSQC of **6** in  $\text{CD}_2\text{Cl}_2$  at 298K.

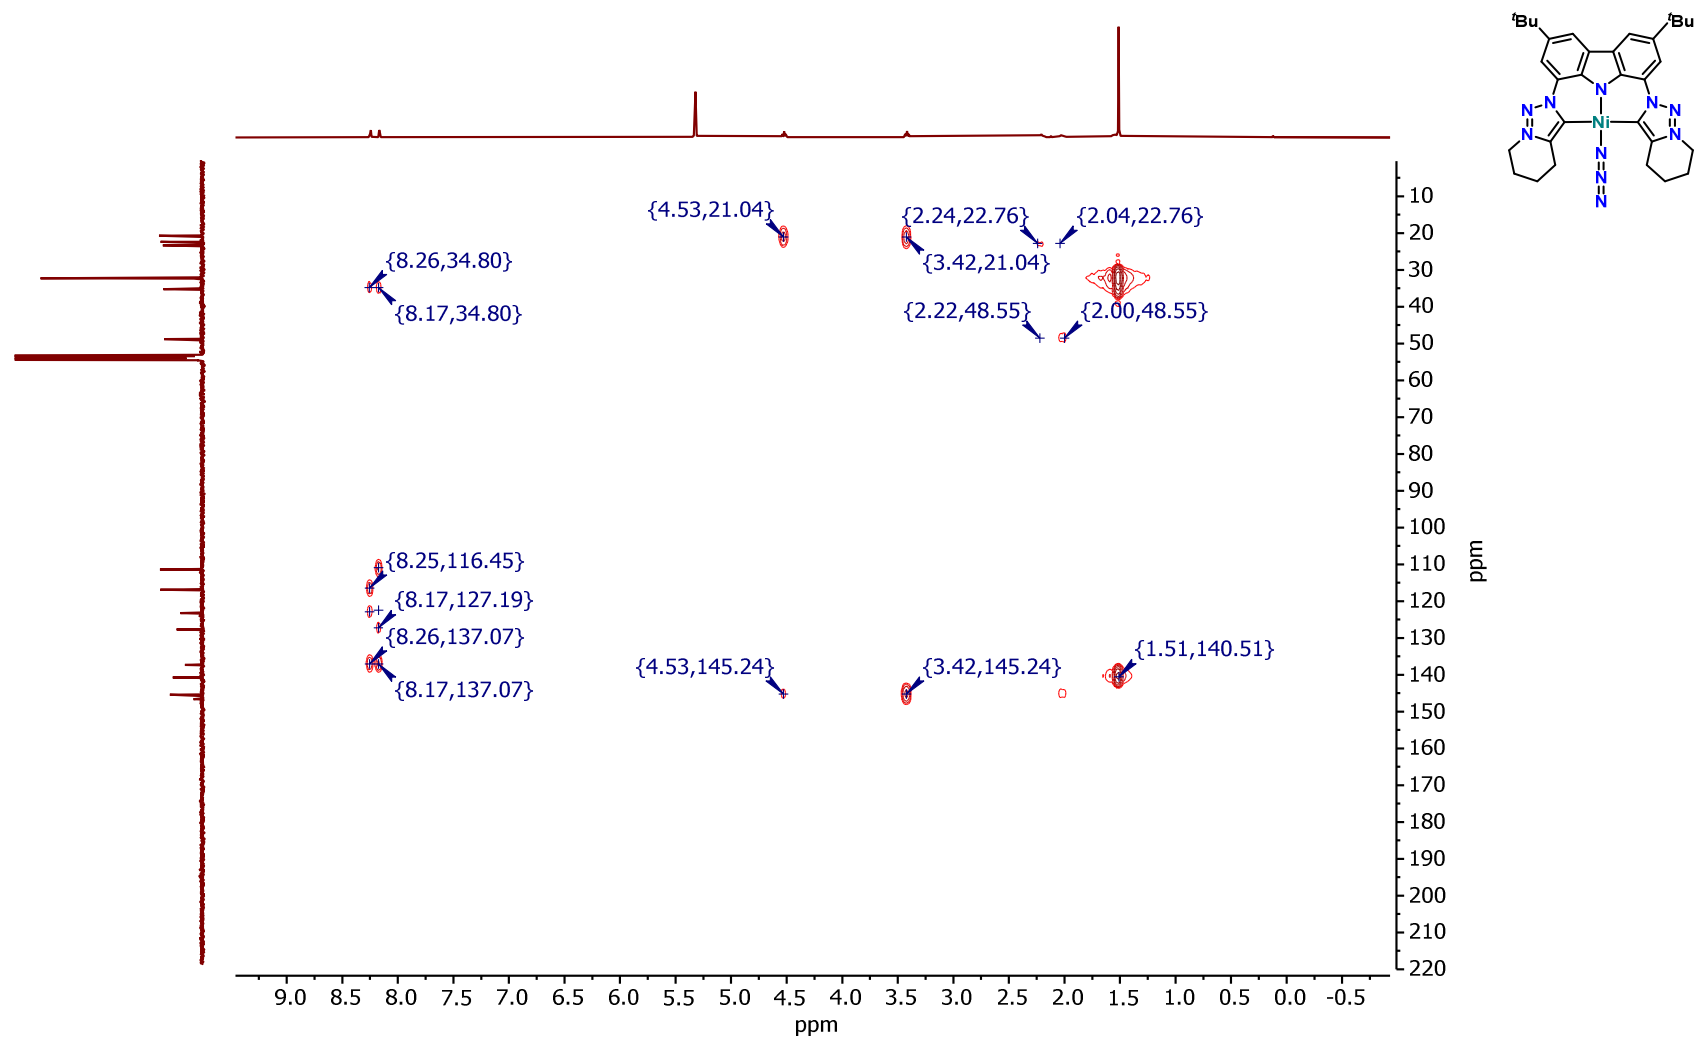

Figure S 34:  $^1\text{H} - ^{13}\text{C}$  HMBC of **6** in  $\text{CD}_2\text{Cl}_2$  at 298K.

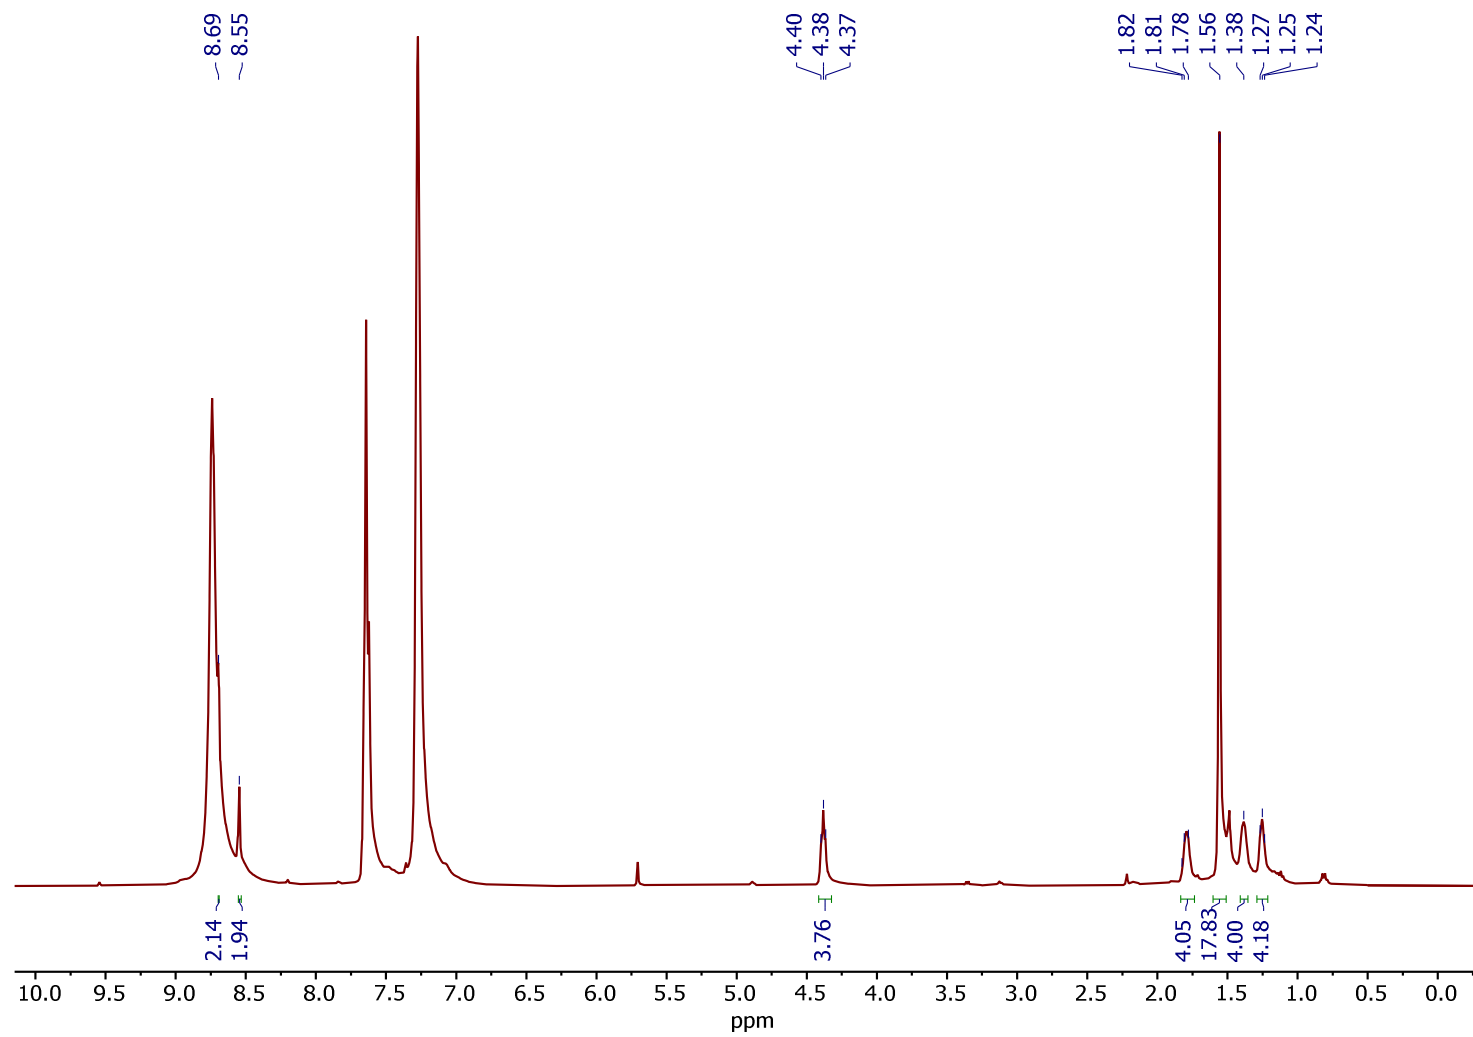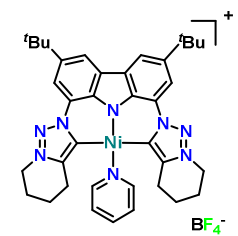

Figure S 35:  $^1\text{H}$  NMR of **7** in  $\text{C}_5\text{D}_5\text{N}$  at 298K.

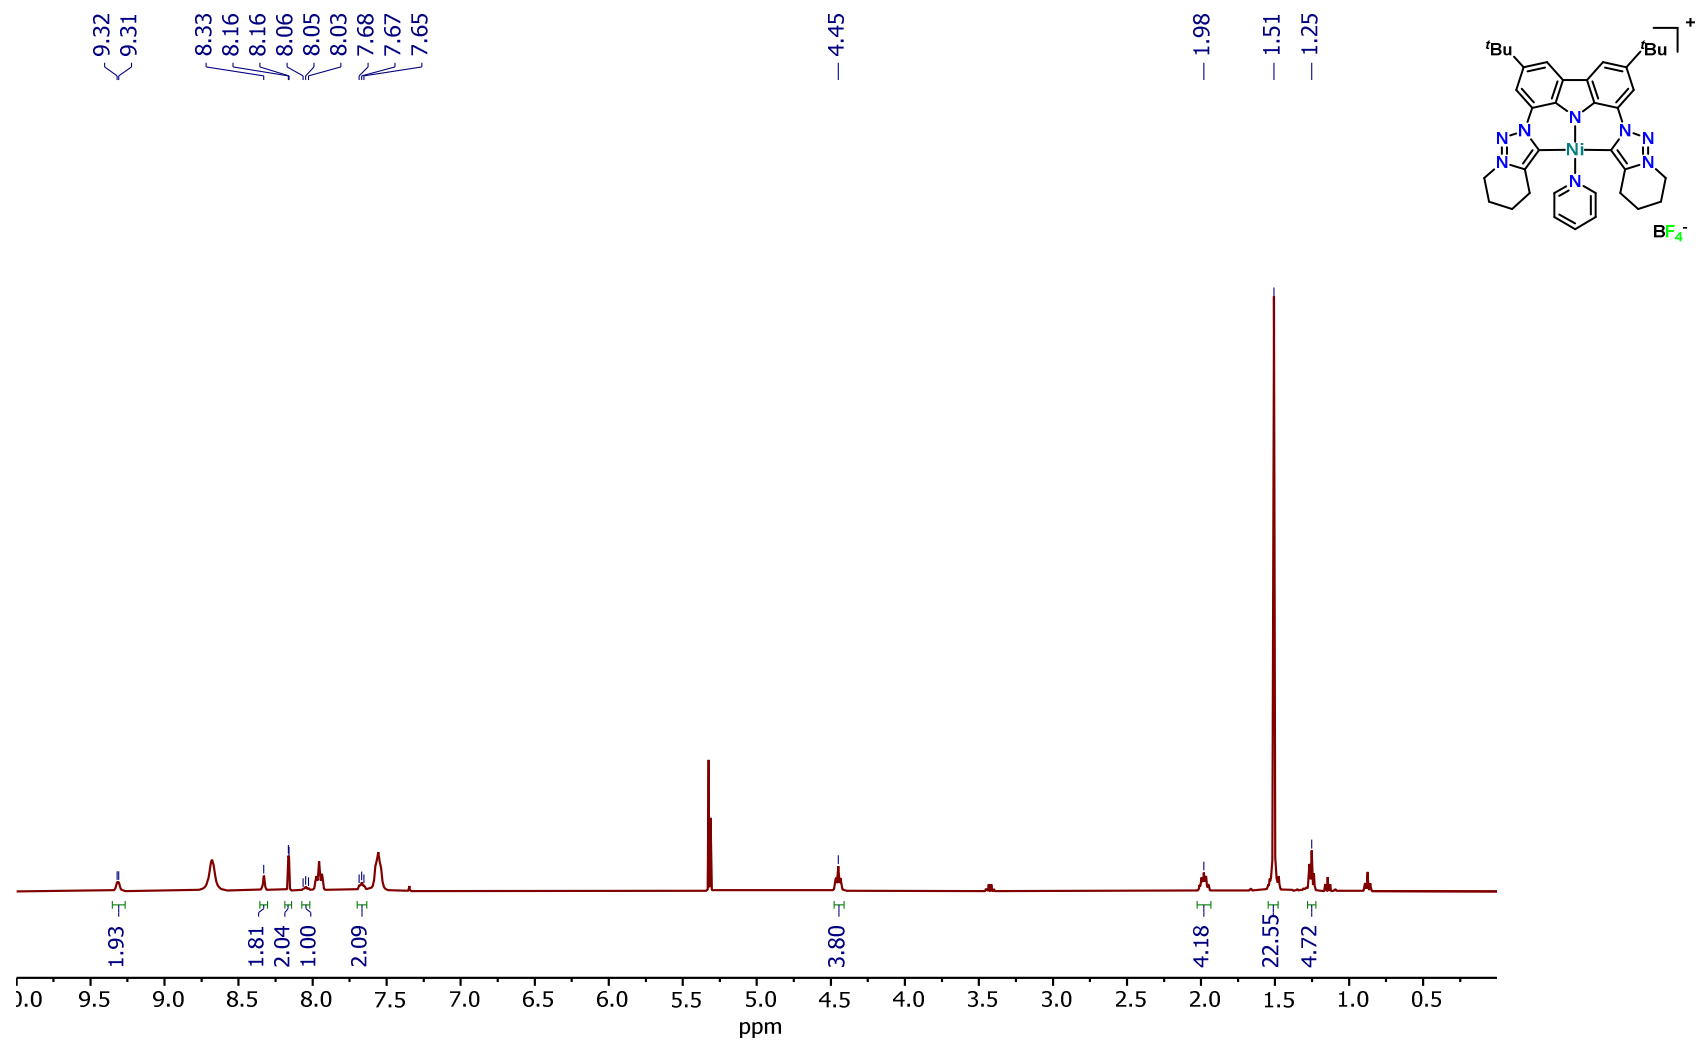

Figure S 36:  $^1\text{H}$  NMR of **7** in  $\text{C}_6\text{D}_6$  with 5 drops of pyridine at 298K.

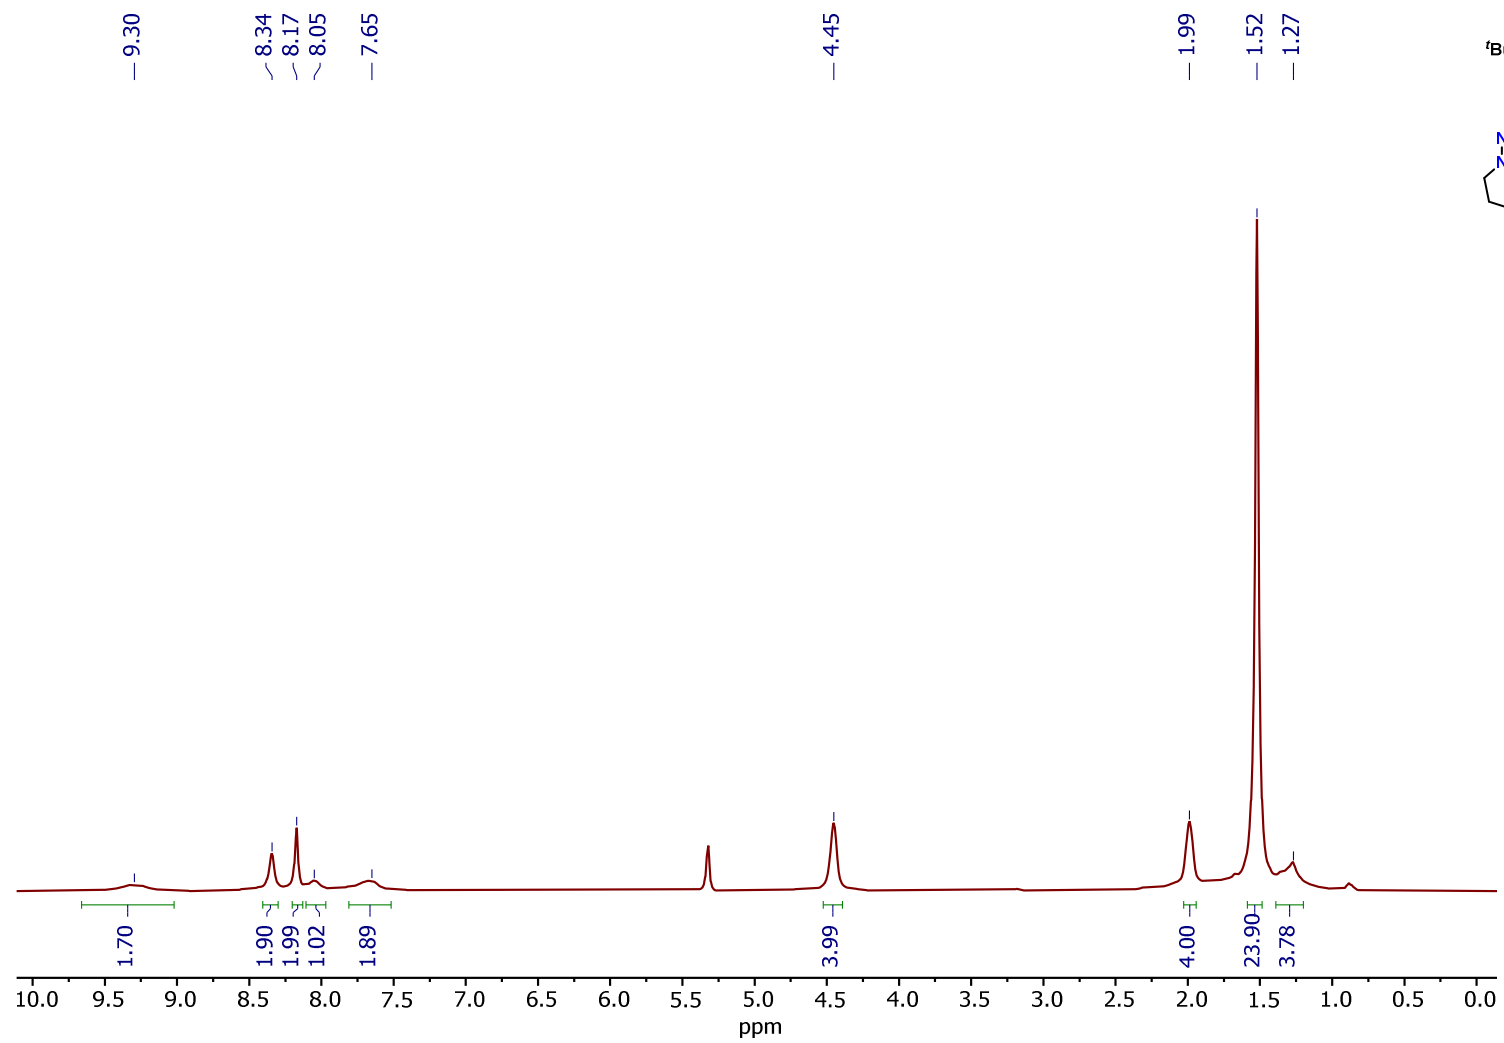

Figure S 37:  $^1\text{H}$  NMR of **7** in  $\text{C}_6\text{D}_6$  at 298K.

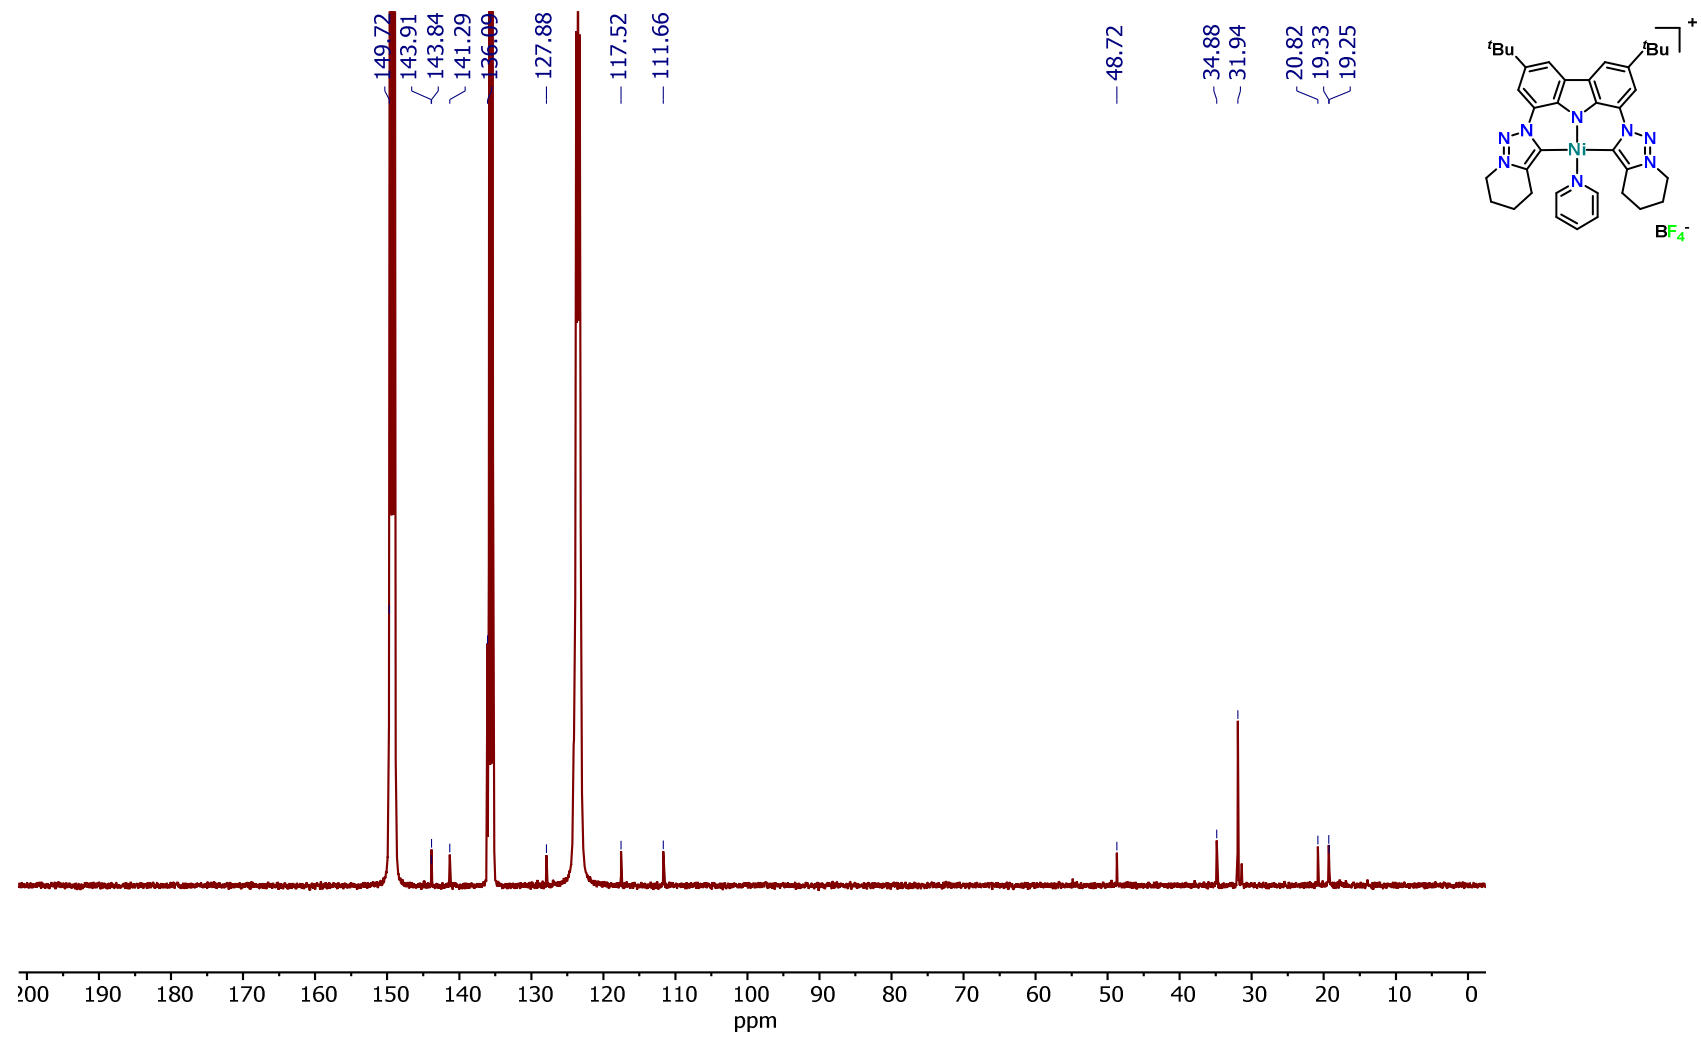

Figure S 38:  $^{13}\text{C}$  NMR of **7** in  $\text{C}_5\text{D}_5\text{N}$  at 298K.

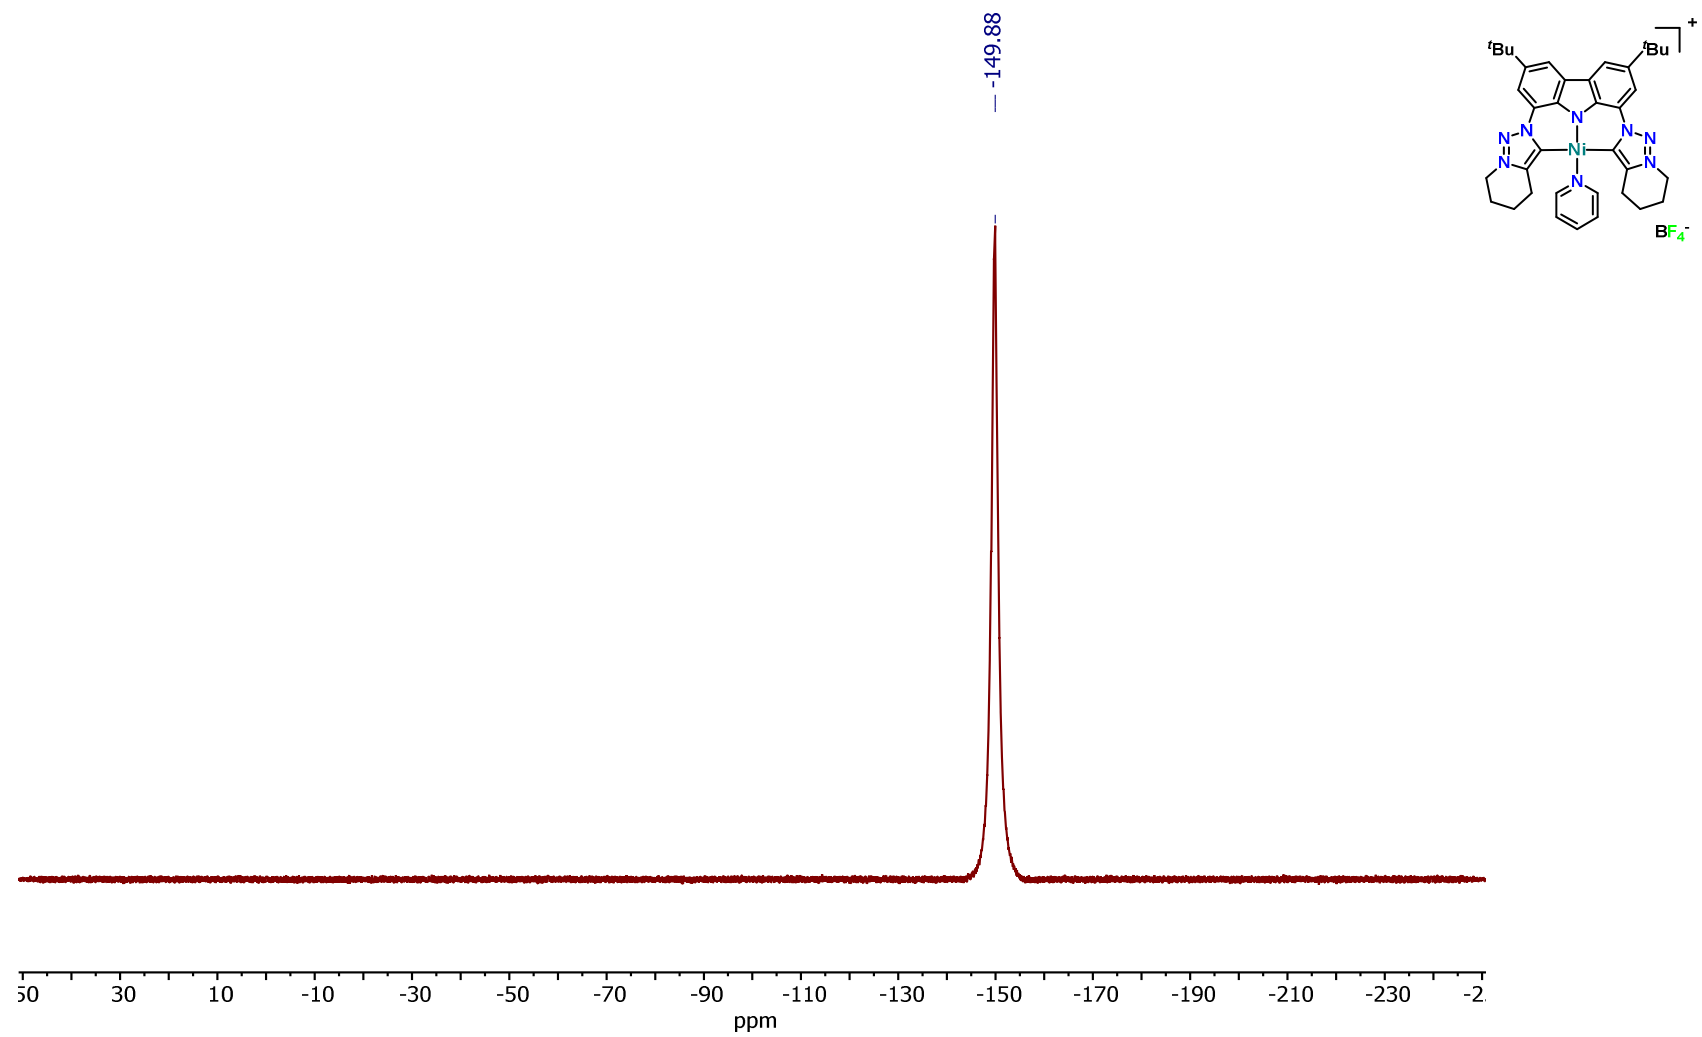

Figure S 39:  $^{19}\text{F}$  NMR of **7** in  $\text{C}_5\text{D}_5\text{N}$  at 298K.



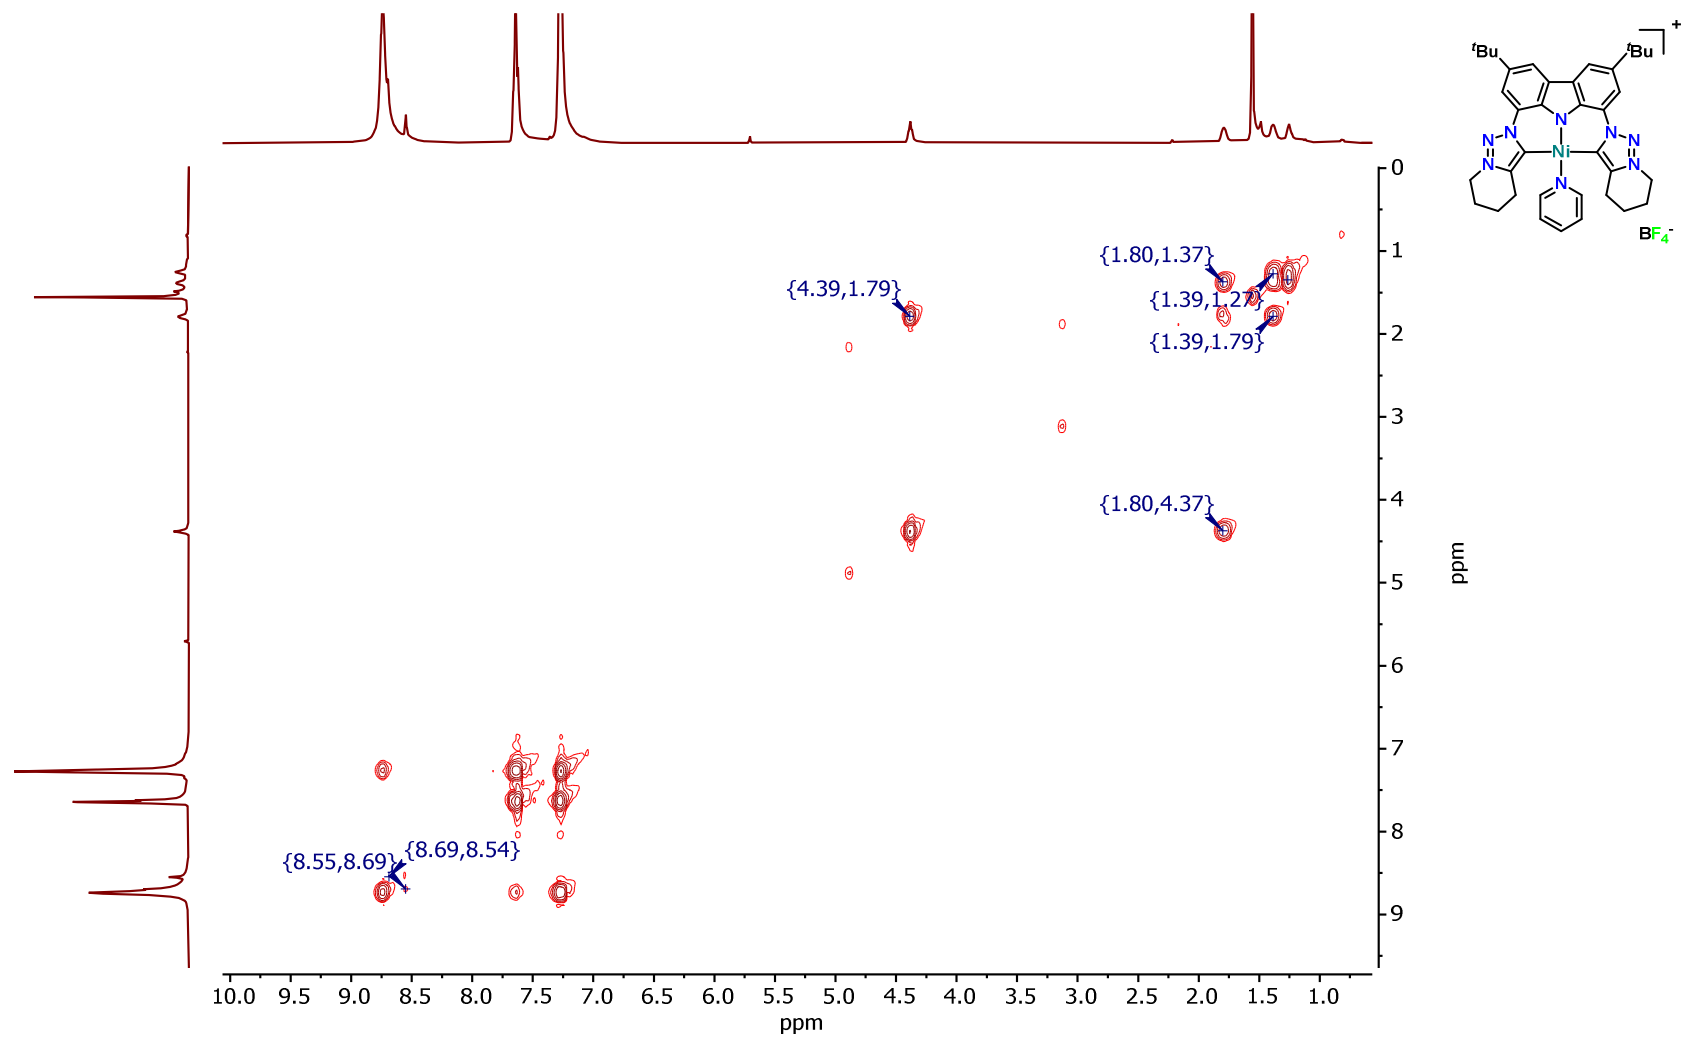

Figure S 40:  $^1\text{H} - ^1\text{H}$  COSY of **7** in  $\text{C}_5\text{D}_5\text{N}$  at 298K.

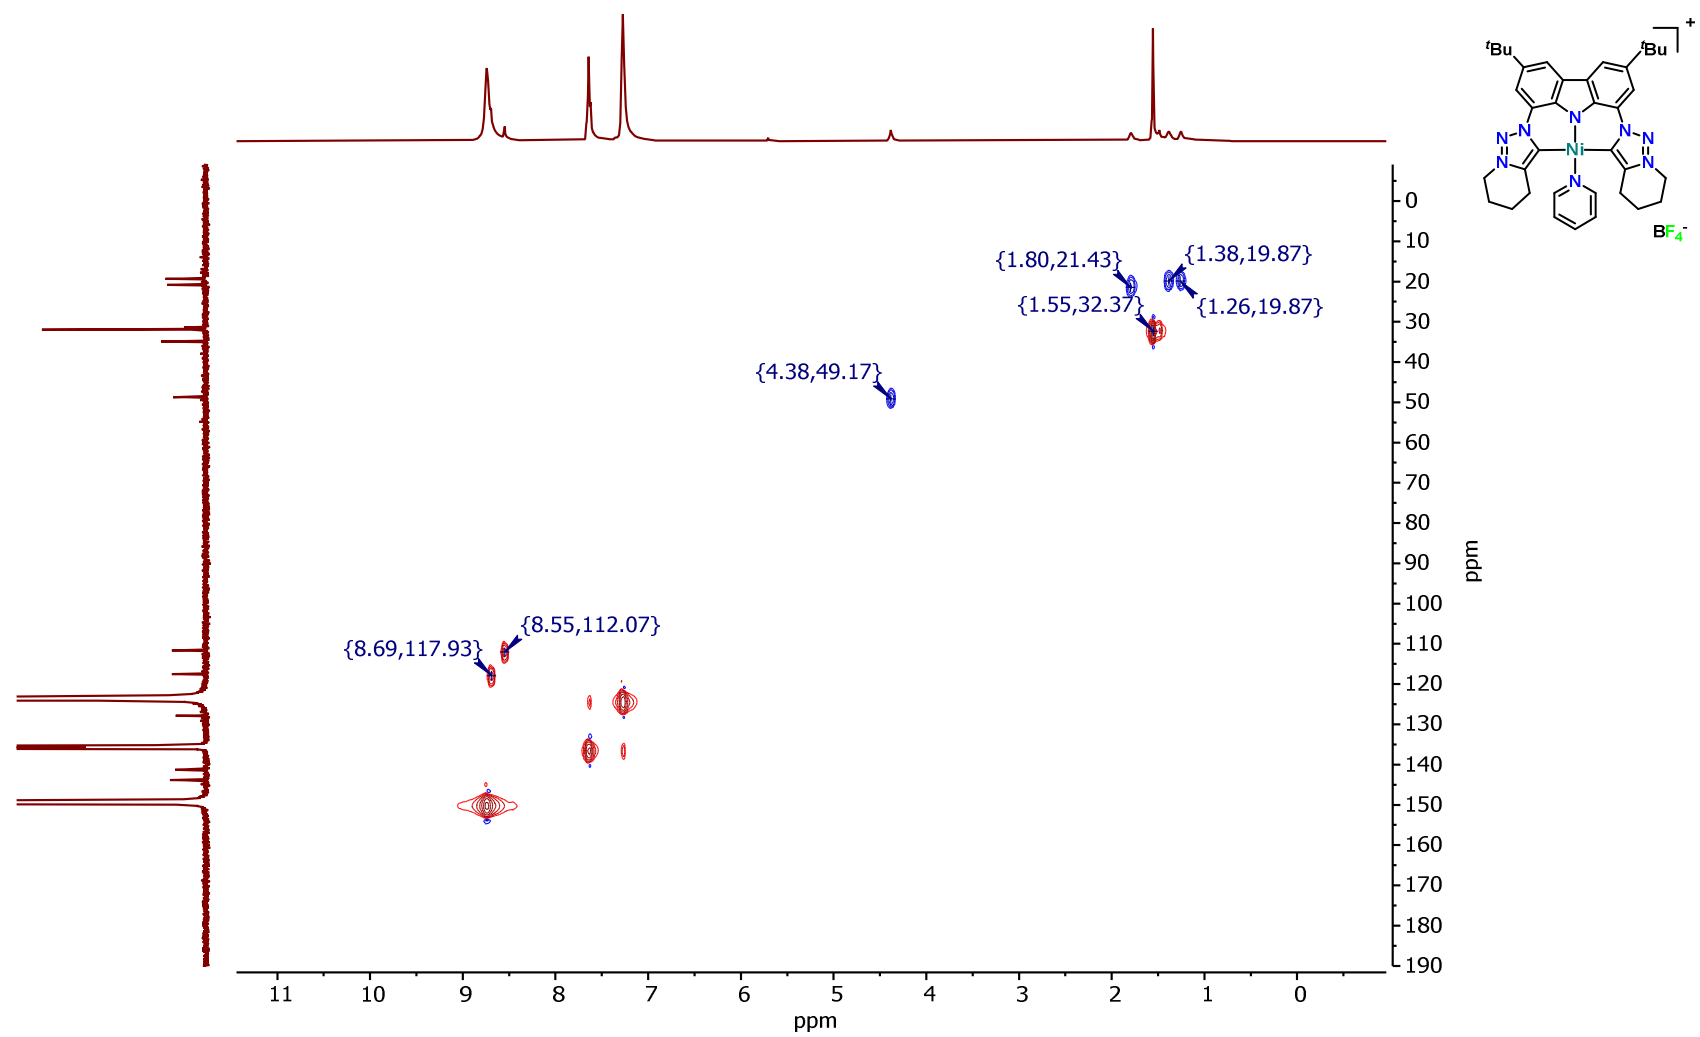

Figure S 41:  $^1\text{H} - ^{13}\text{C}$  HSQC of **7** in  $\text{C}_5\text{D}_5\text{N}$  at 298K.

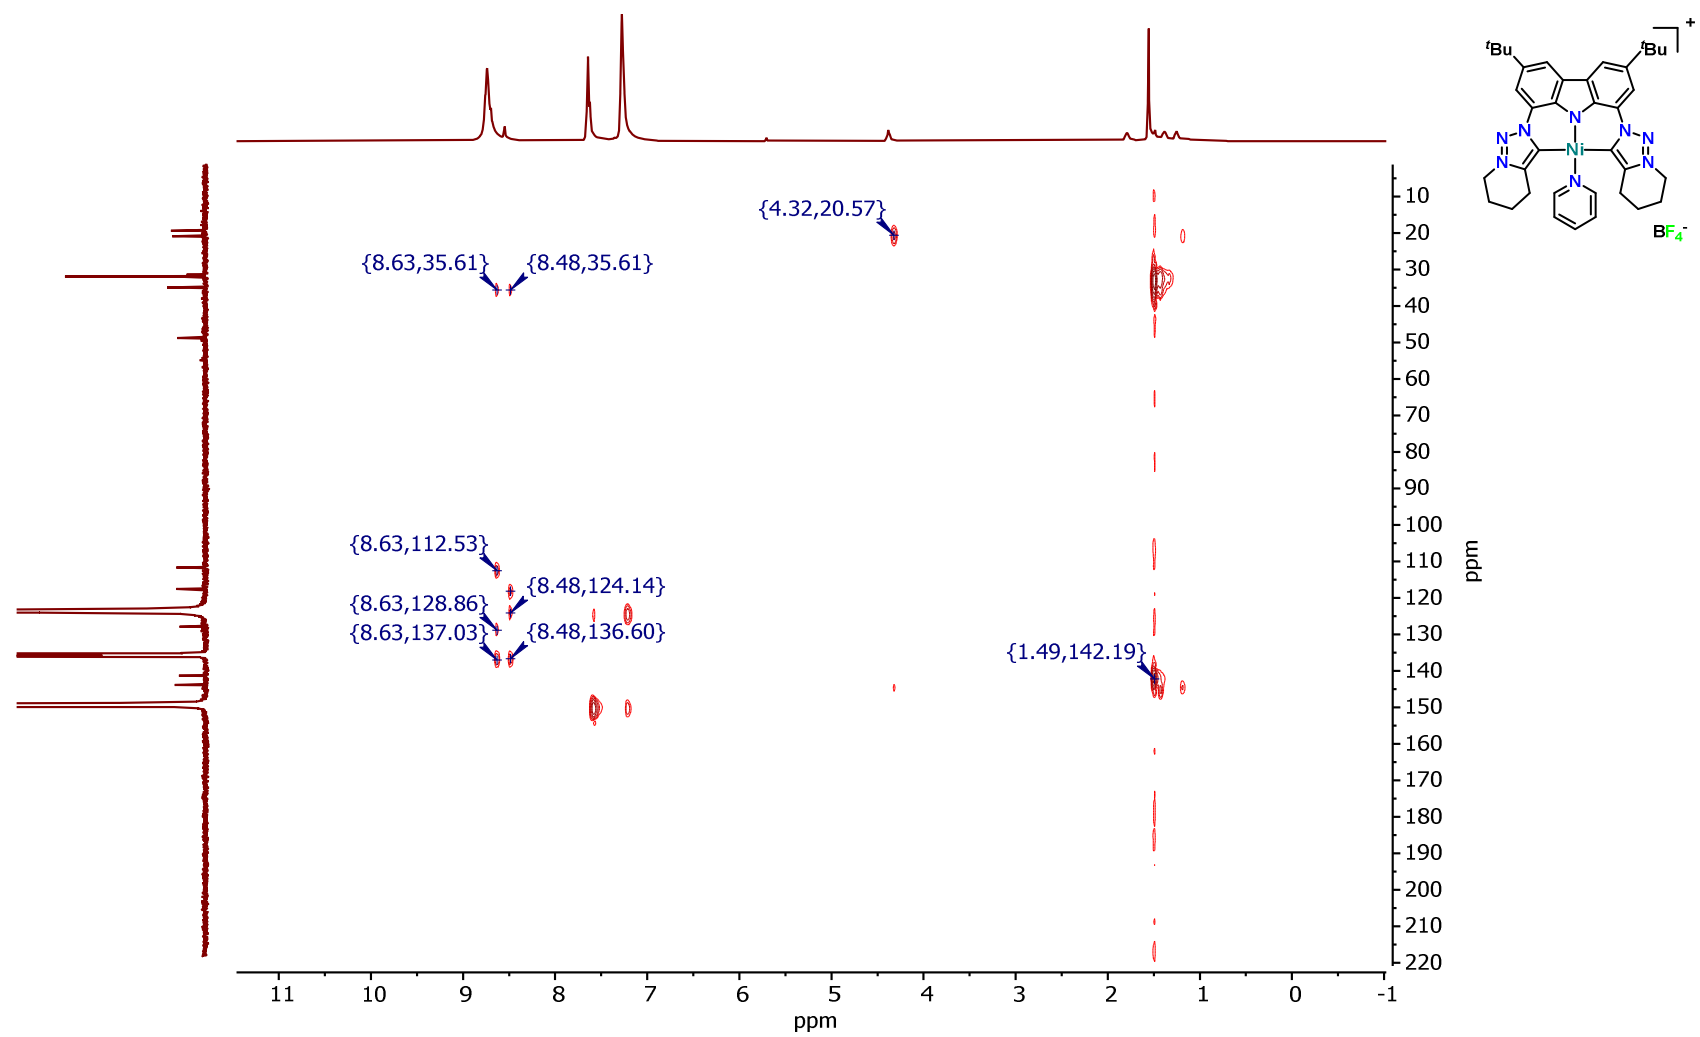

Figure S 42:  $^1\text{H} - ^{13}\text{C}$  HMBC of **7** in  $\text{C}_5\text{D}_5\text{N}$  at 298K.

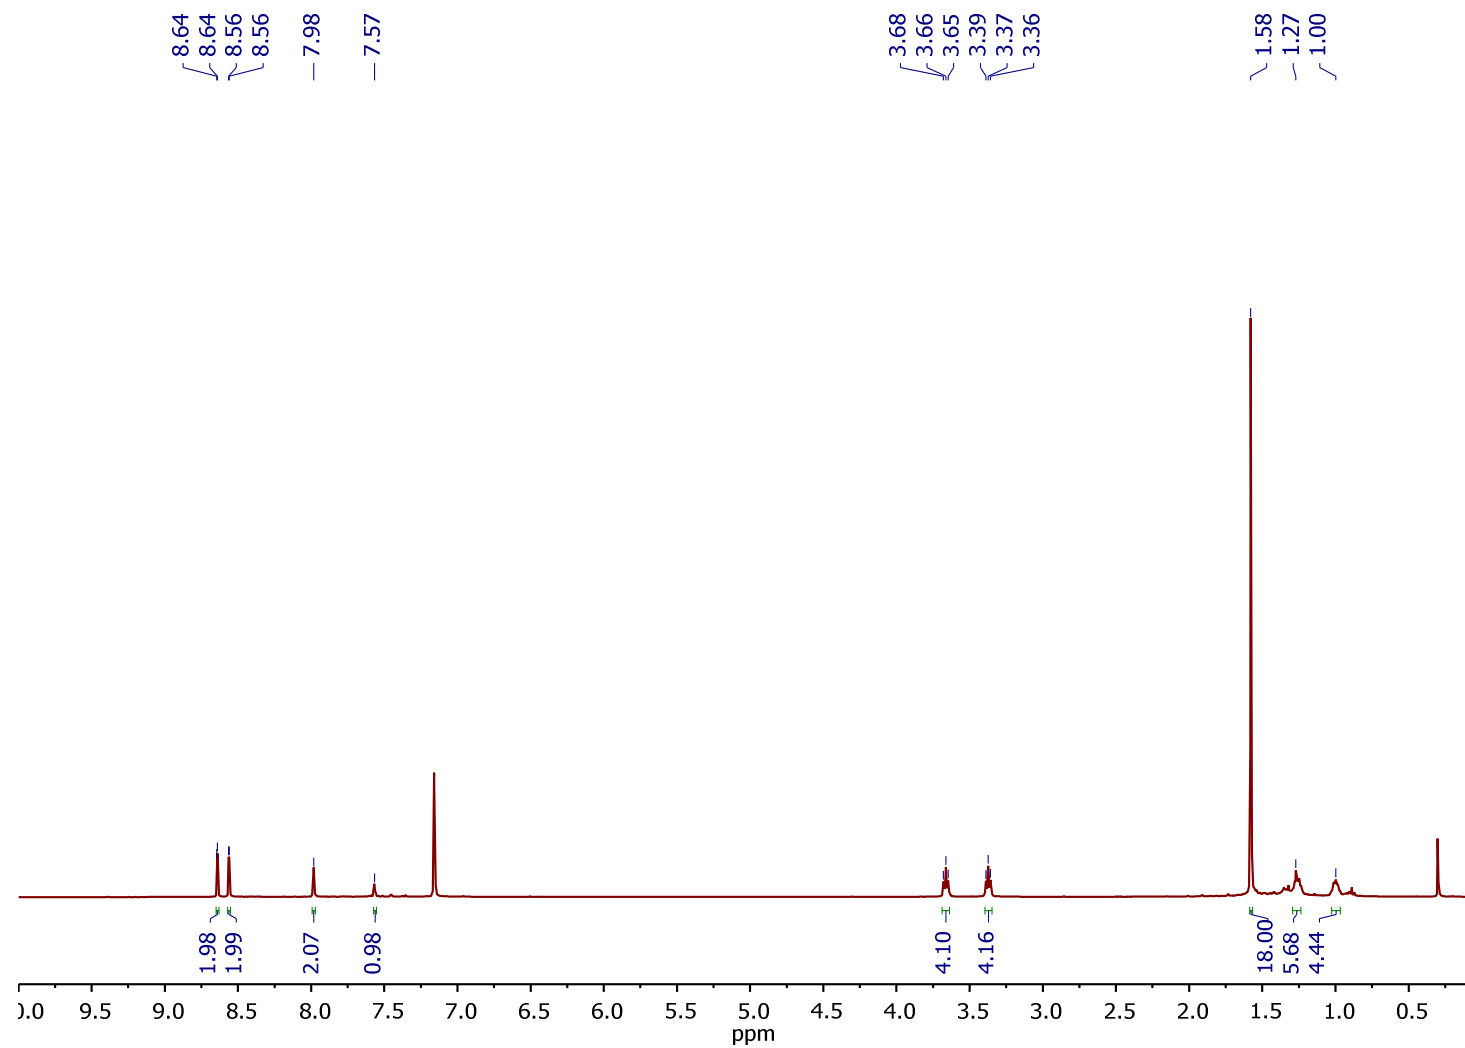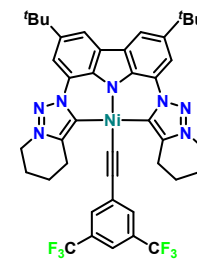

Figure S 43:  $^1\text{H}$  NMR of **8** in  $\text{C}_6\text{D}_6$  at 298K.

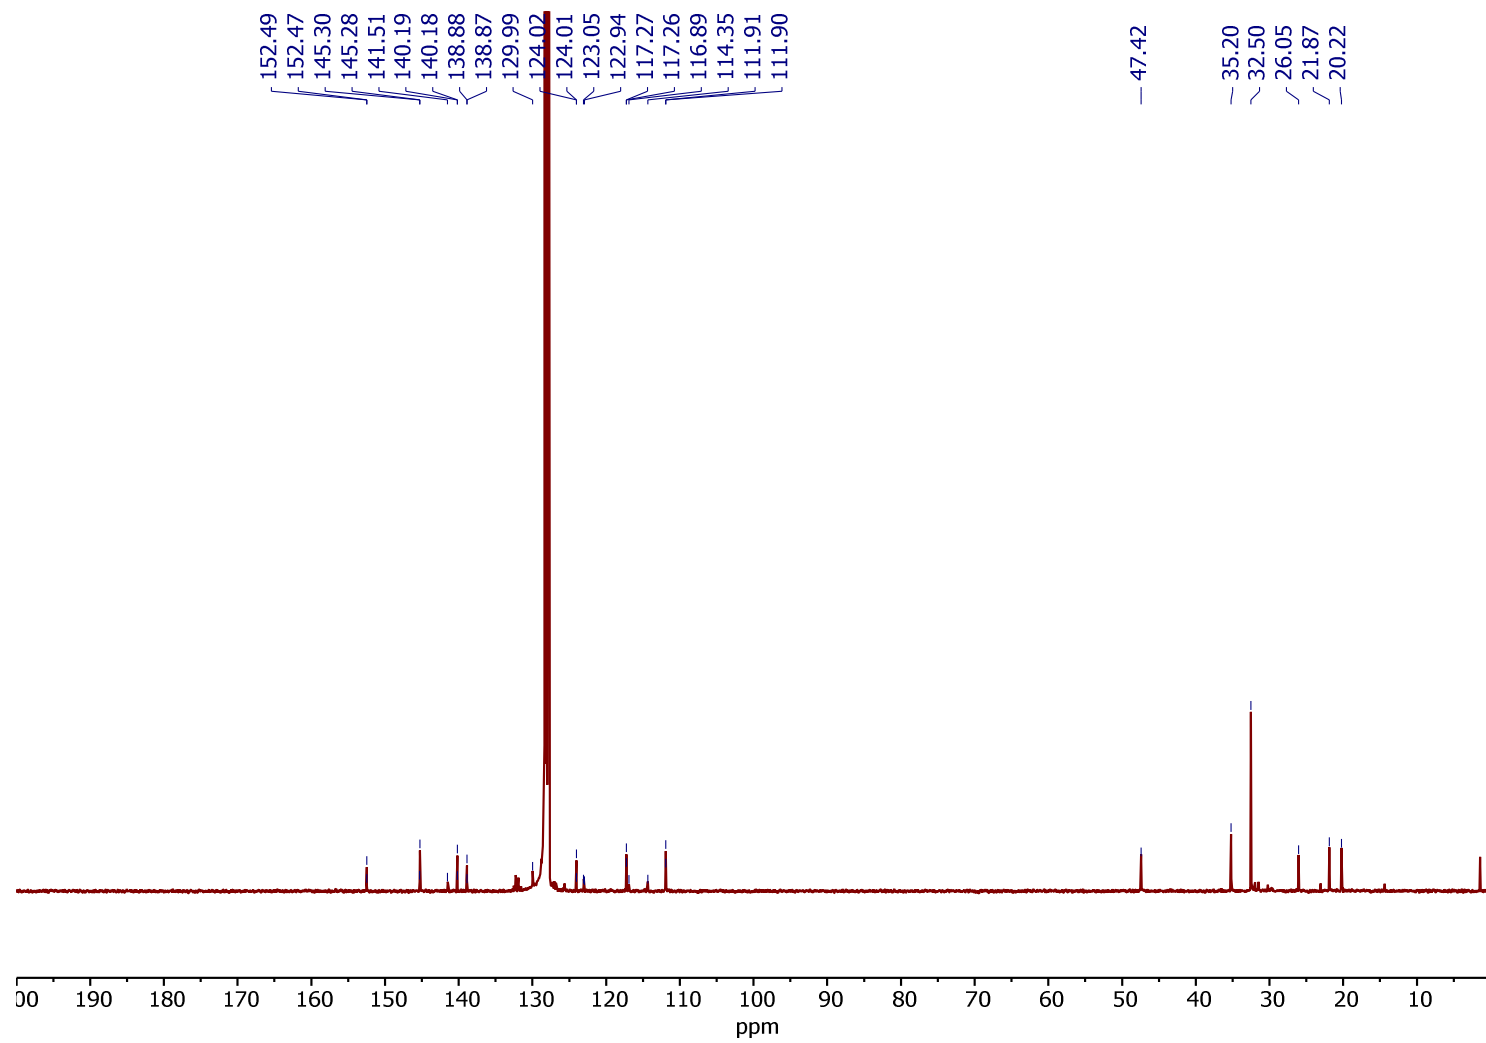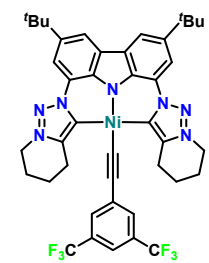

Figure S 44:  $^{13}\text{C}$  NMR of **8** in  $\text{C}_6\text{D}_6$  at 298K.

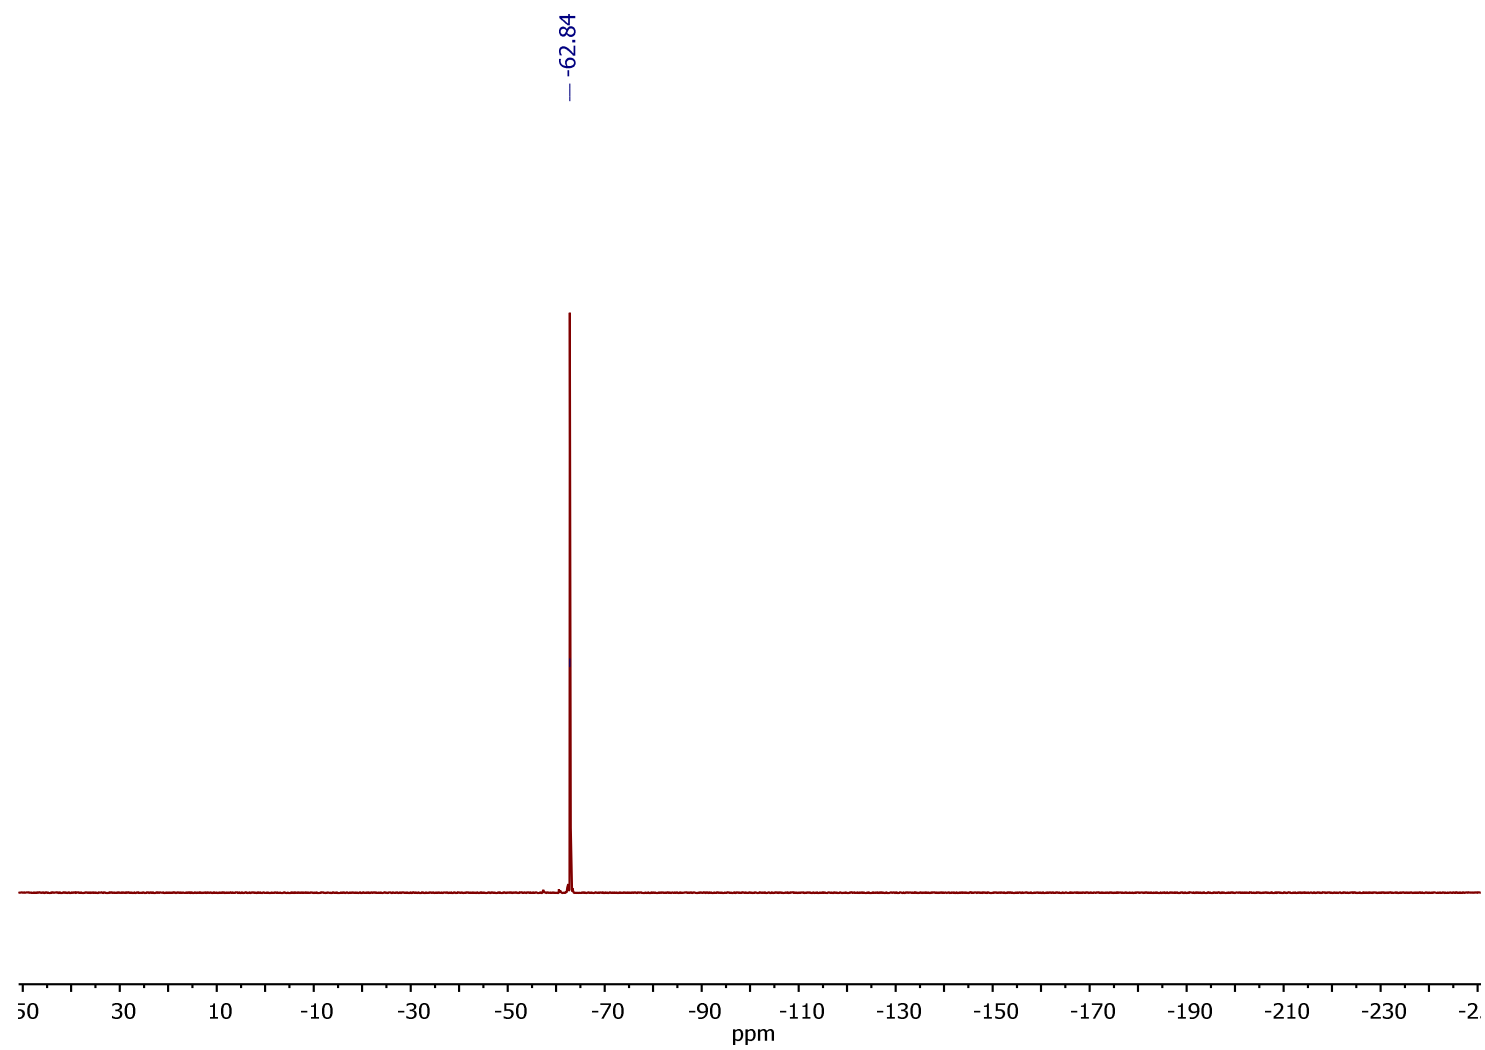

Figure S 45:  $^{19}\text{F}$  NMR of **8** in  $\text{C}_6\text{D}_6$  at 298K.

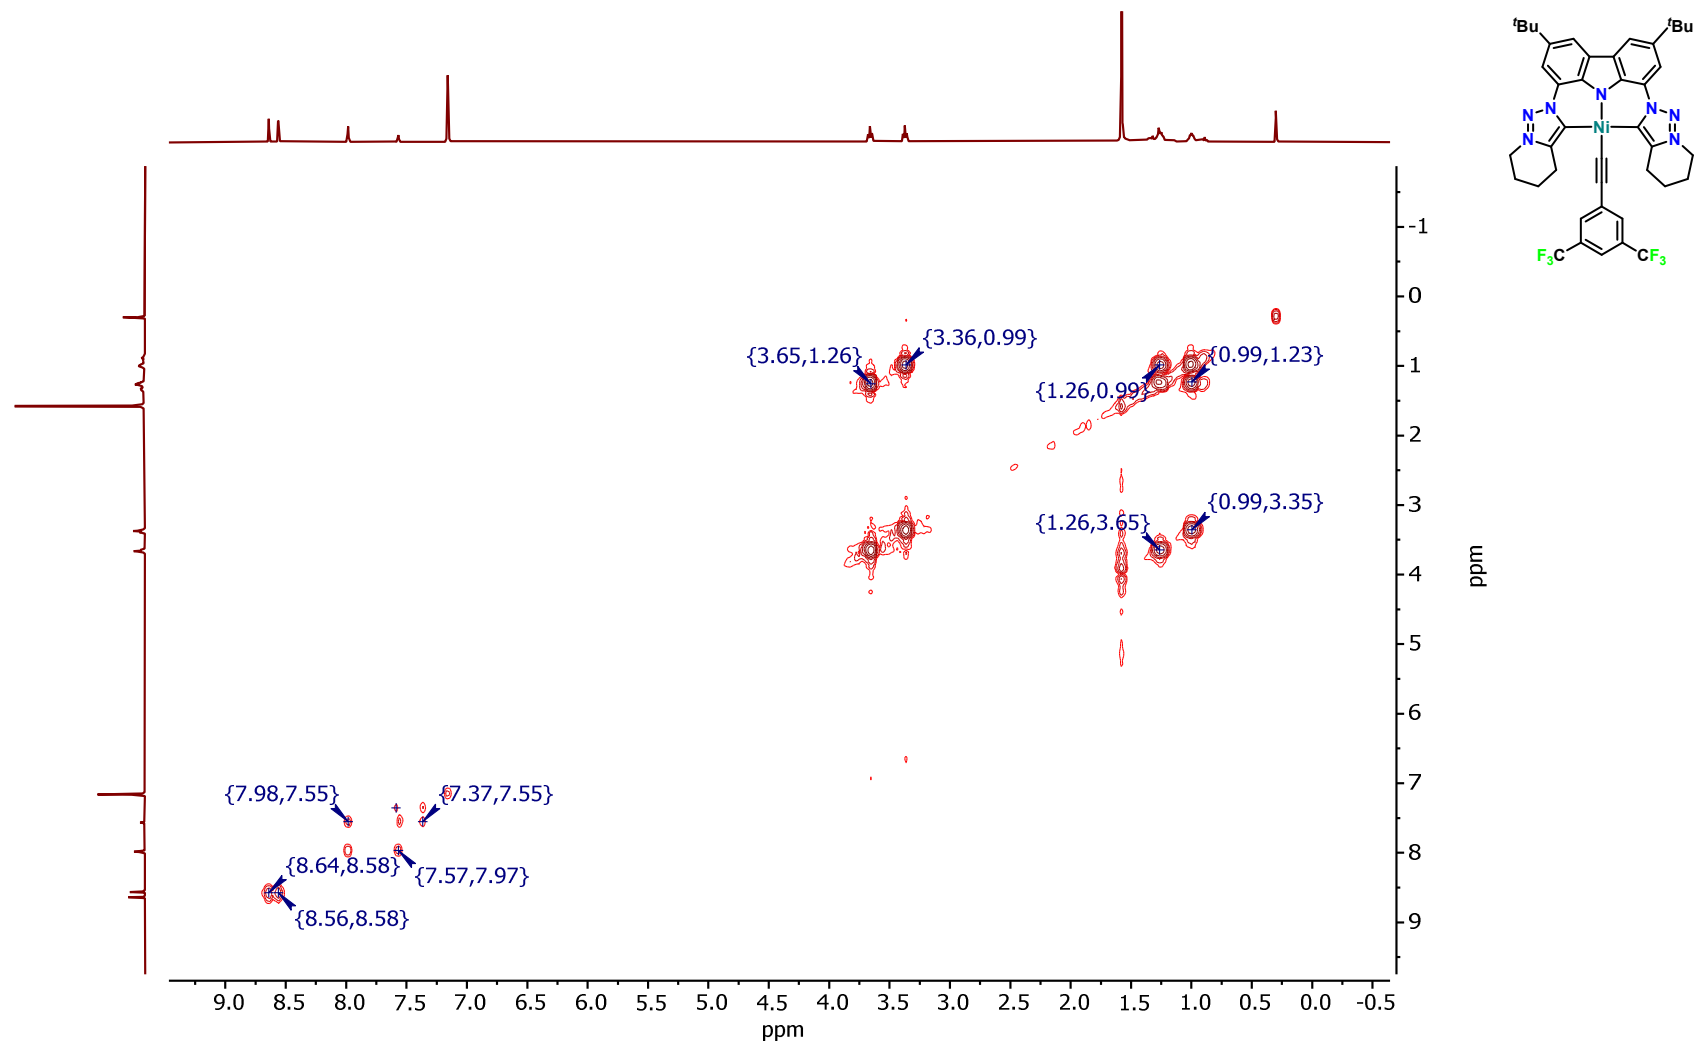

Figure S 46:  $^1\text{H} - ^1\text{H}$  COSY of **8** in  $\text{C}_6\text{D}_6$  at 298K.

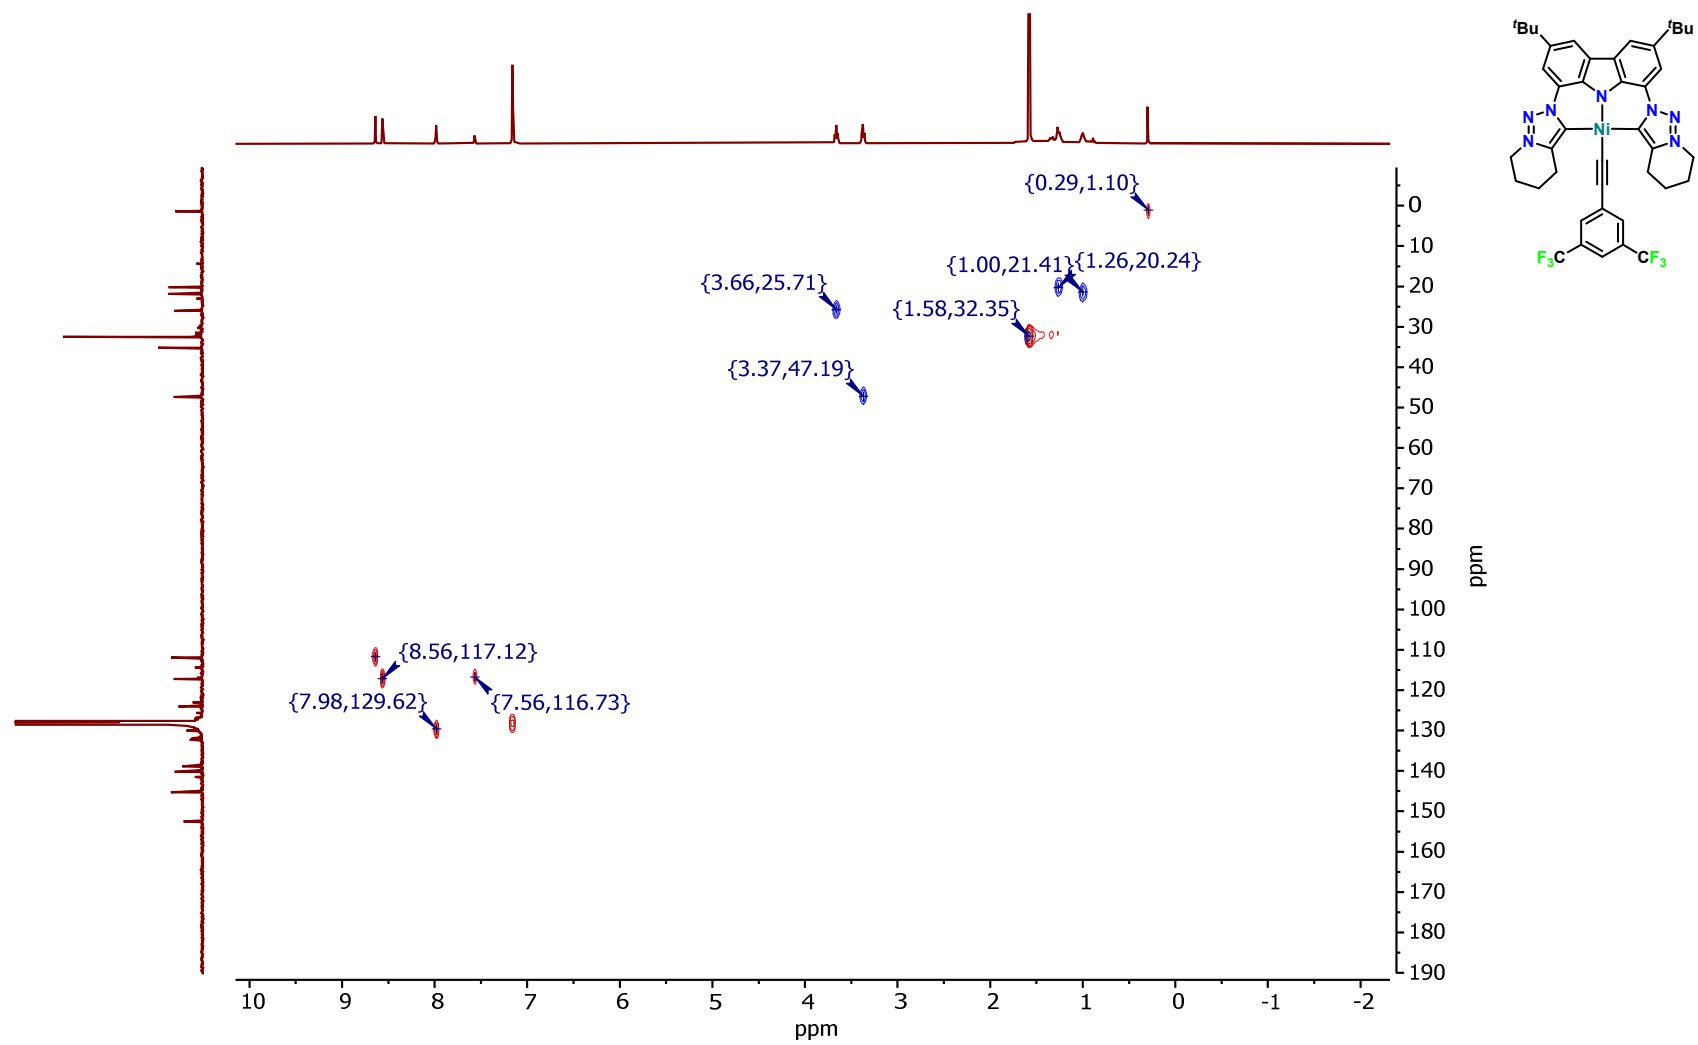

Figure S 47:  $^1\text{H} - ^{13}\text{C}$  HSQC of **8** in  $\text{C}_6\text{D}_6$  at 298K.



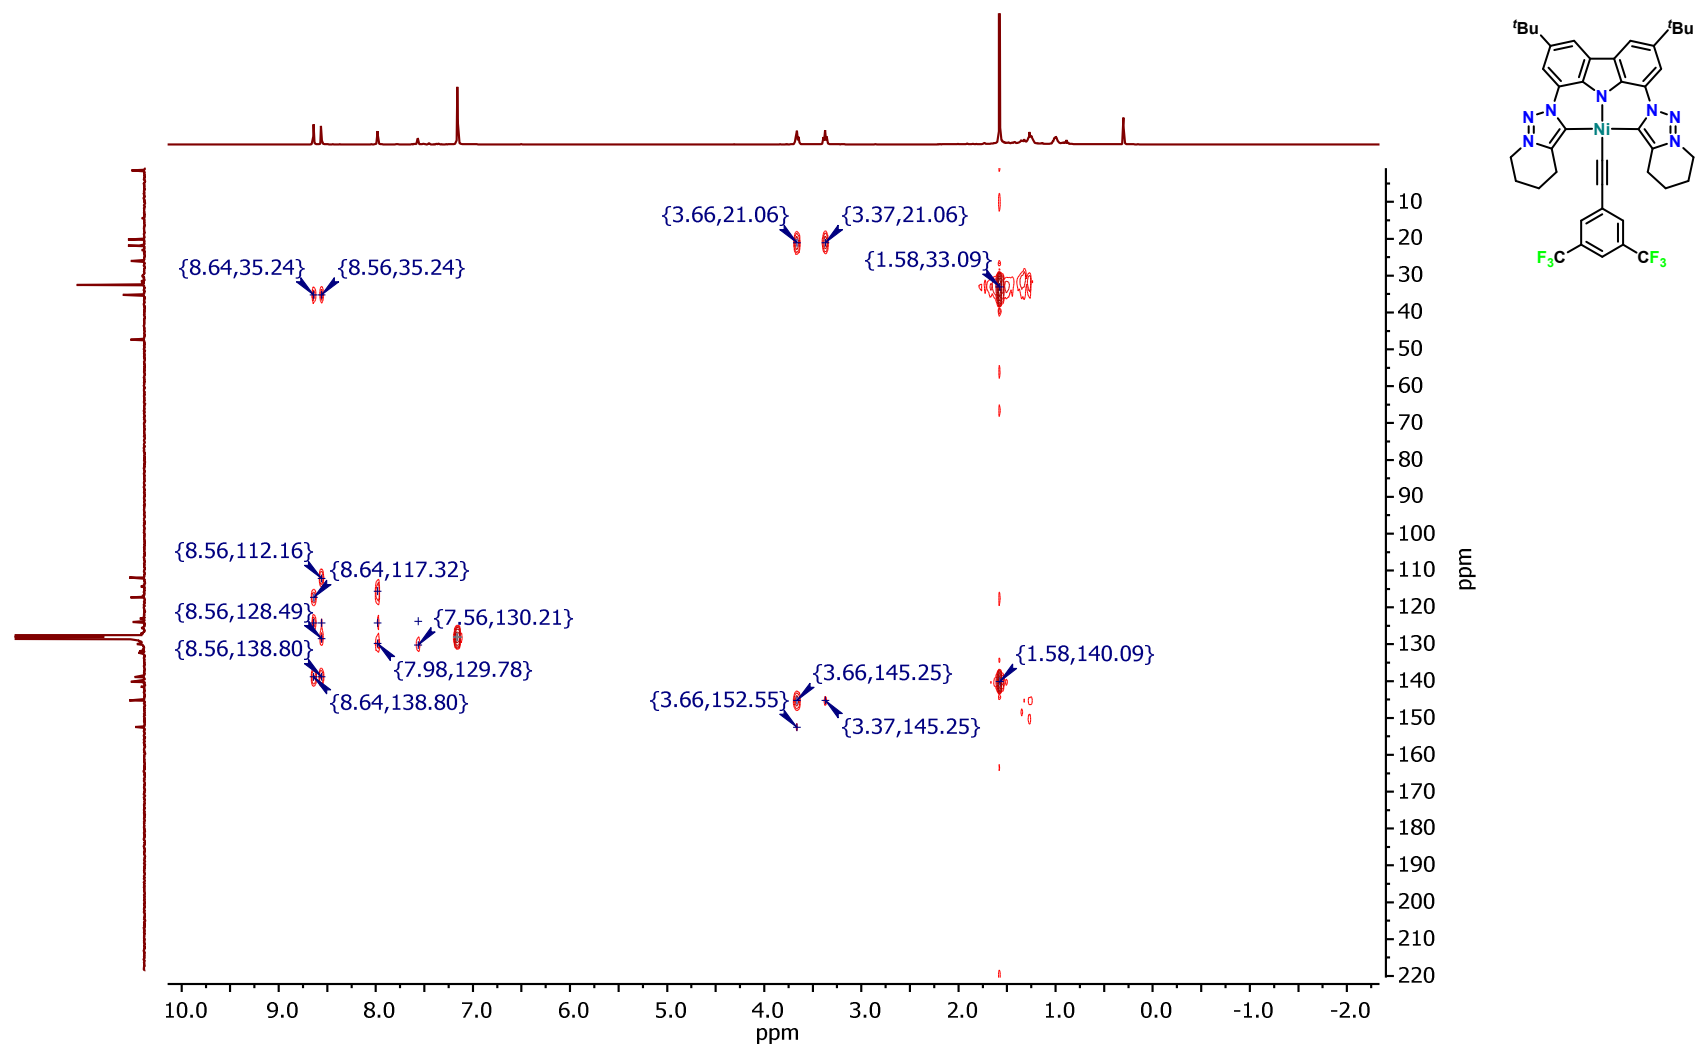

Figure S 48:  $^1\text{H} - ^{13}\text{C}$  HMBC of **8** in  $\text{C}_6\text{D}_6$  at 298K.

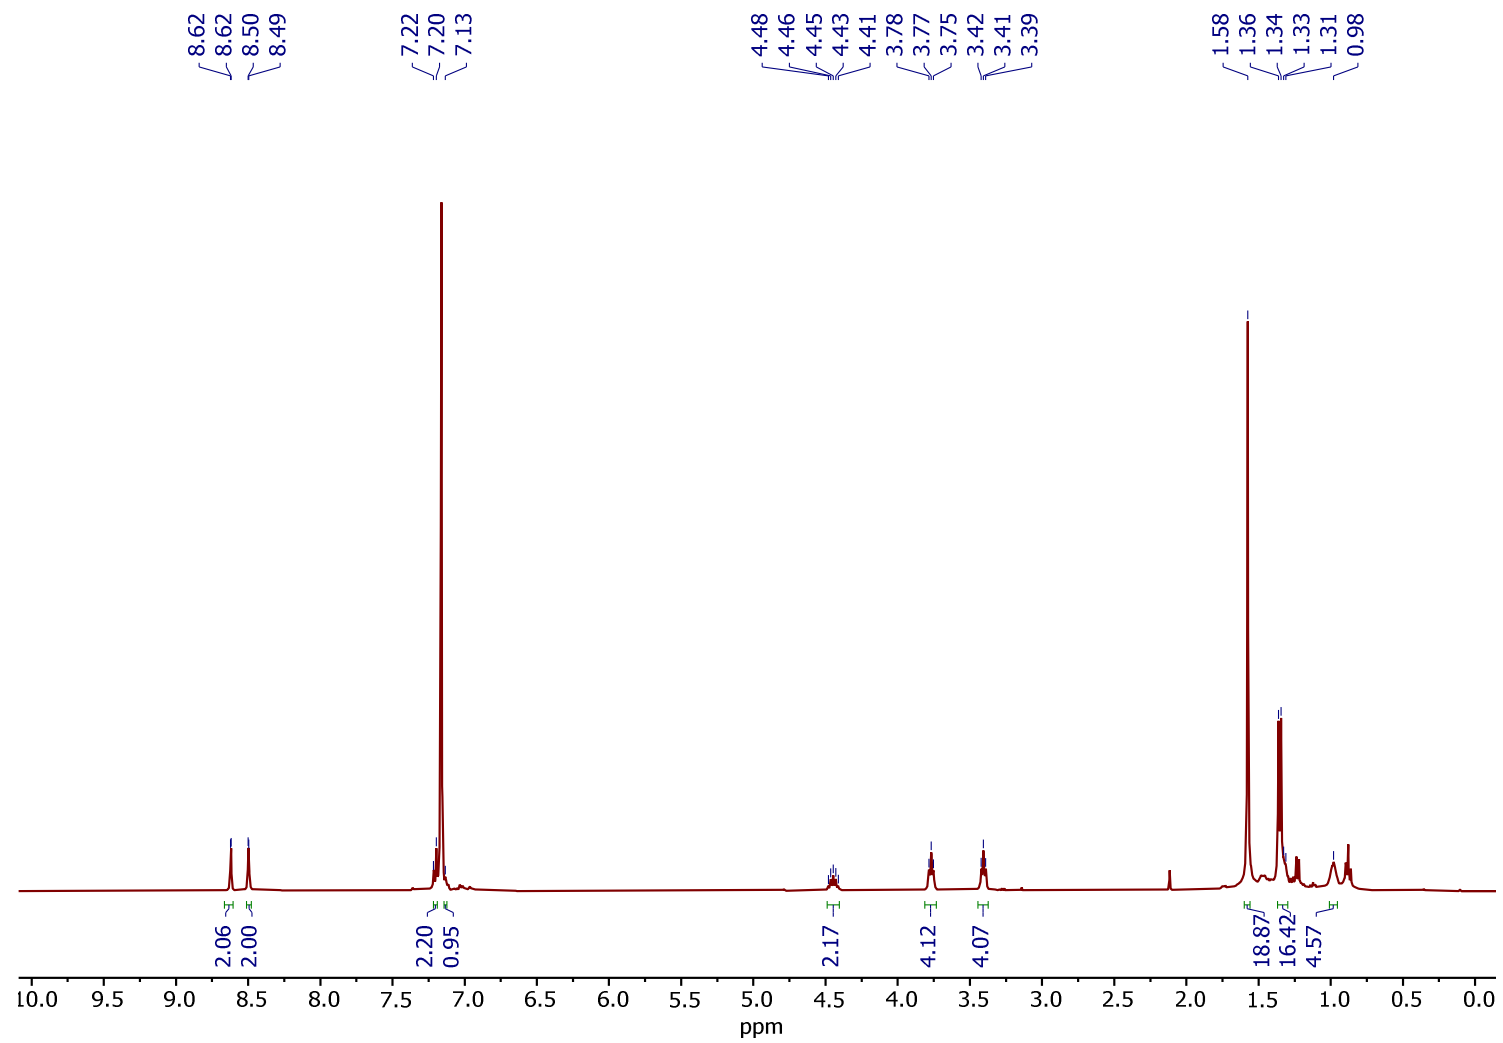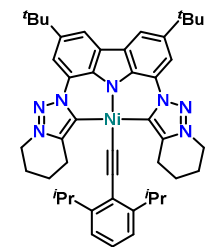

Figure S 49:  $^1\text{H}$  NMR of **9** in  $\text{C}_6\text{D}_6$  at 298K.

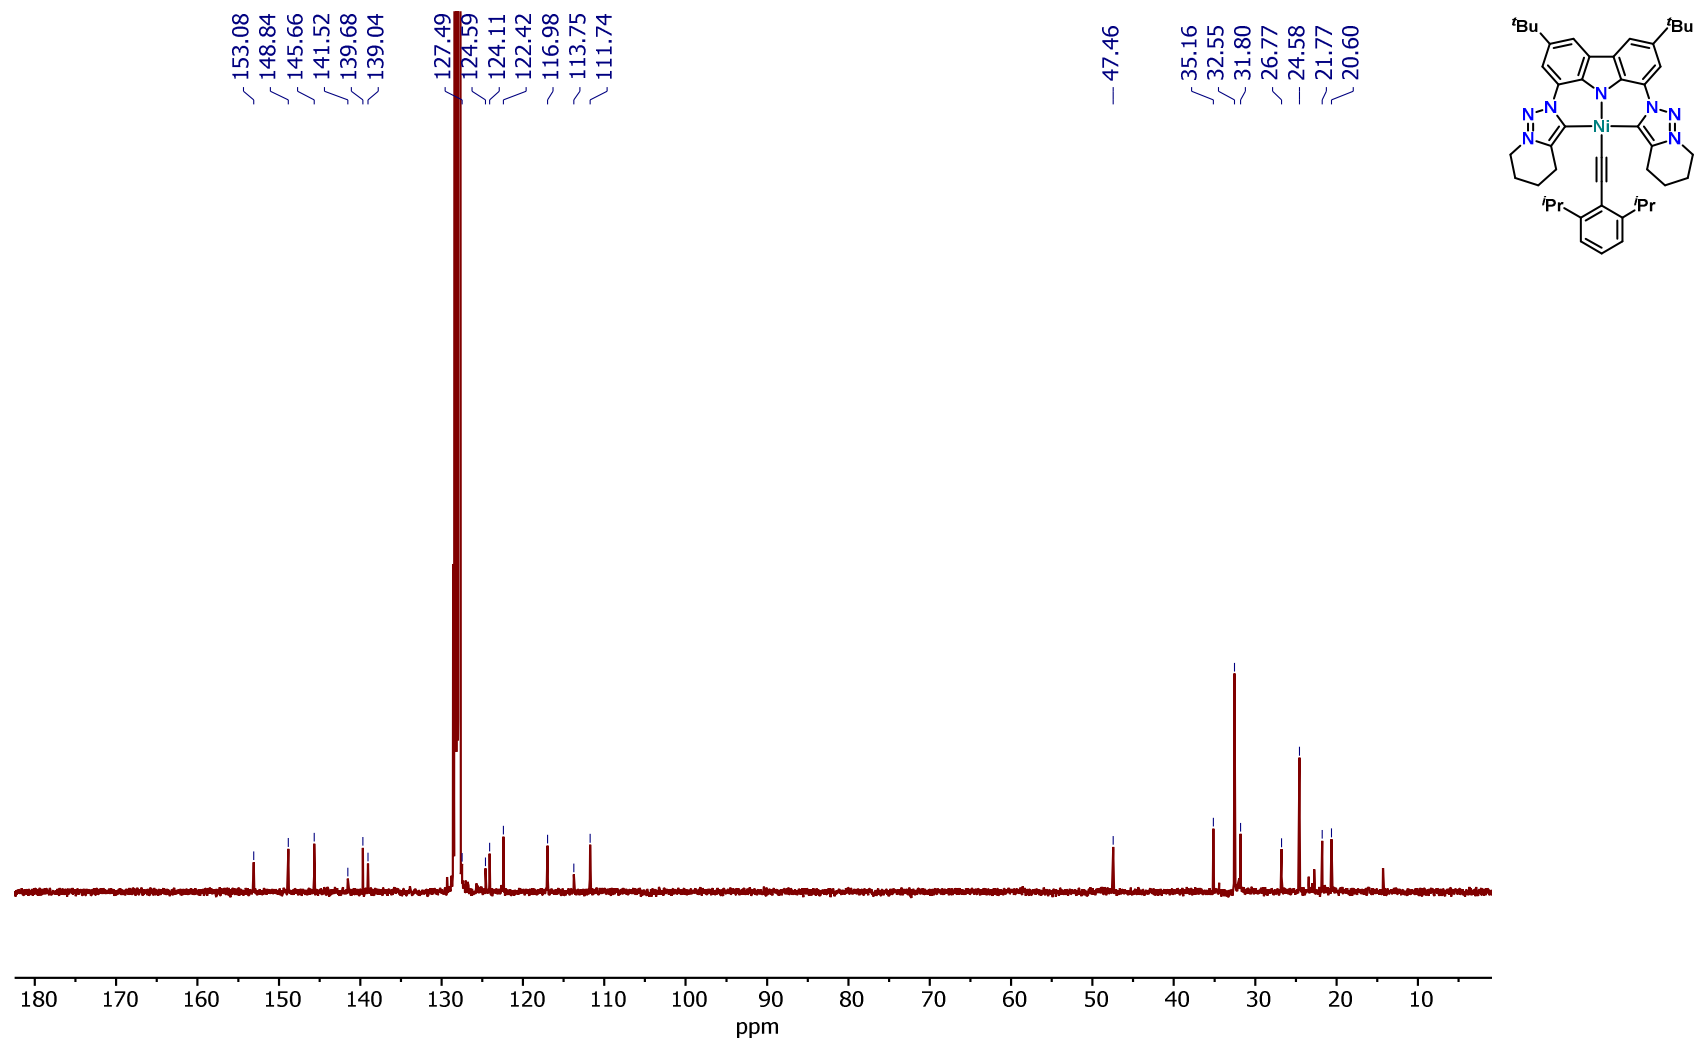

Figure S 50: <sup>13</sup>C NMR of **9** in C<sub>6</sub>D<sub>6</sub> at 298K.

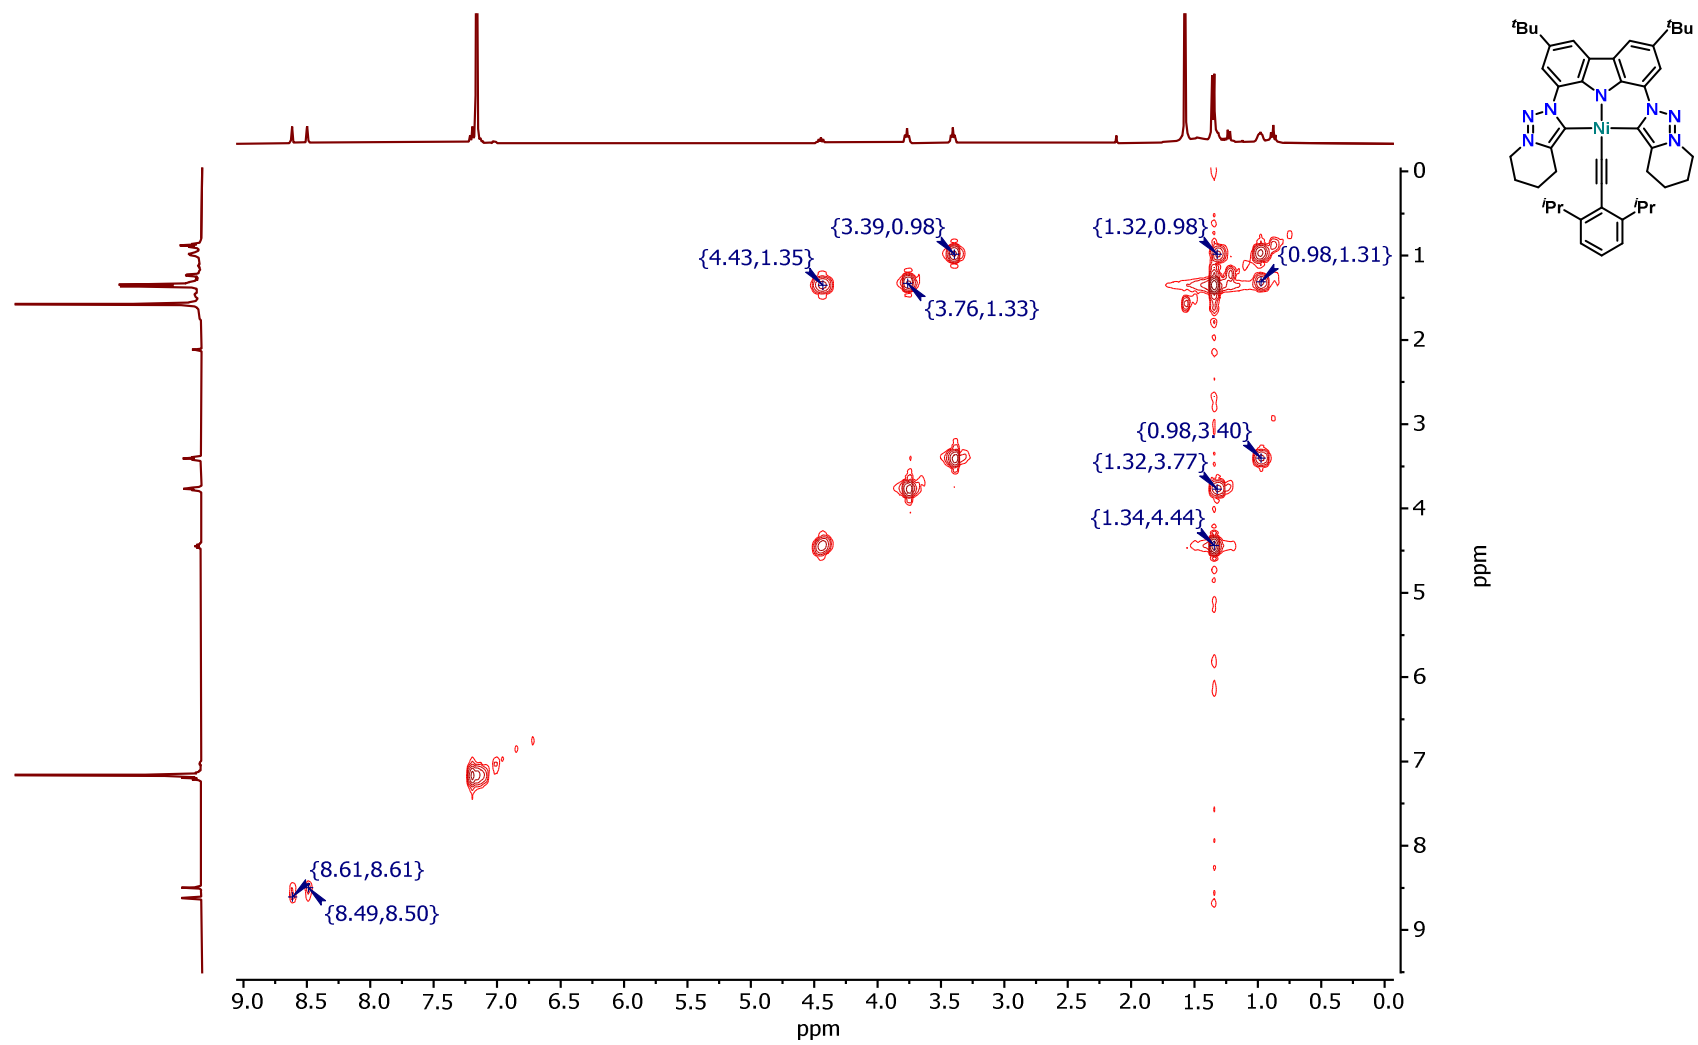

Figure S 51:  $^1\text{H} - ^1\text{H}$  COSY of **9** in  $\text{C}_6\text{D}_6$  at 298K.

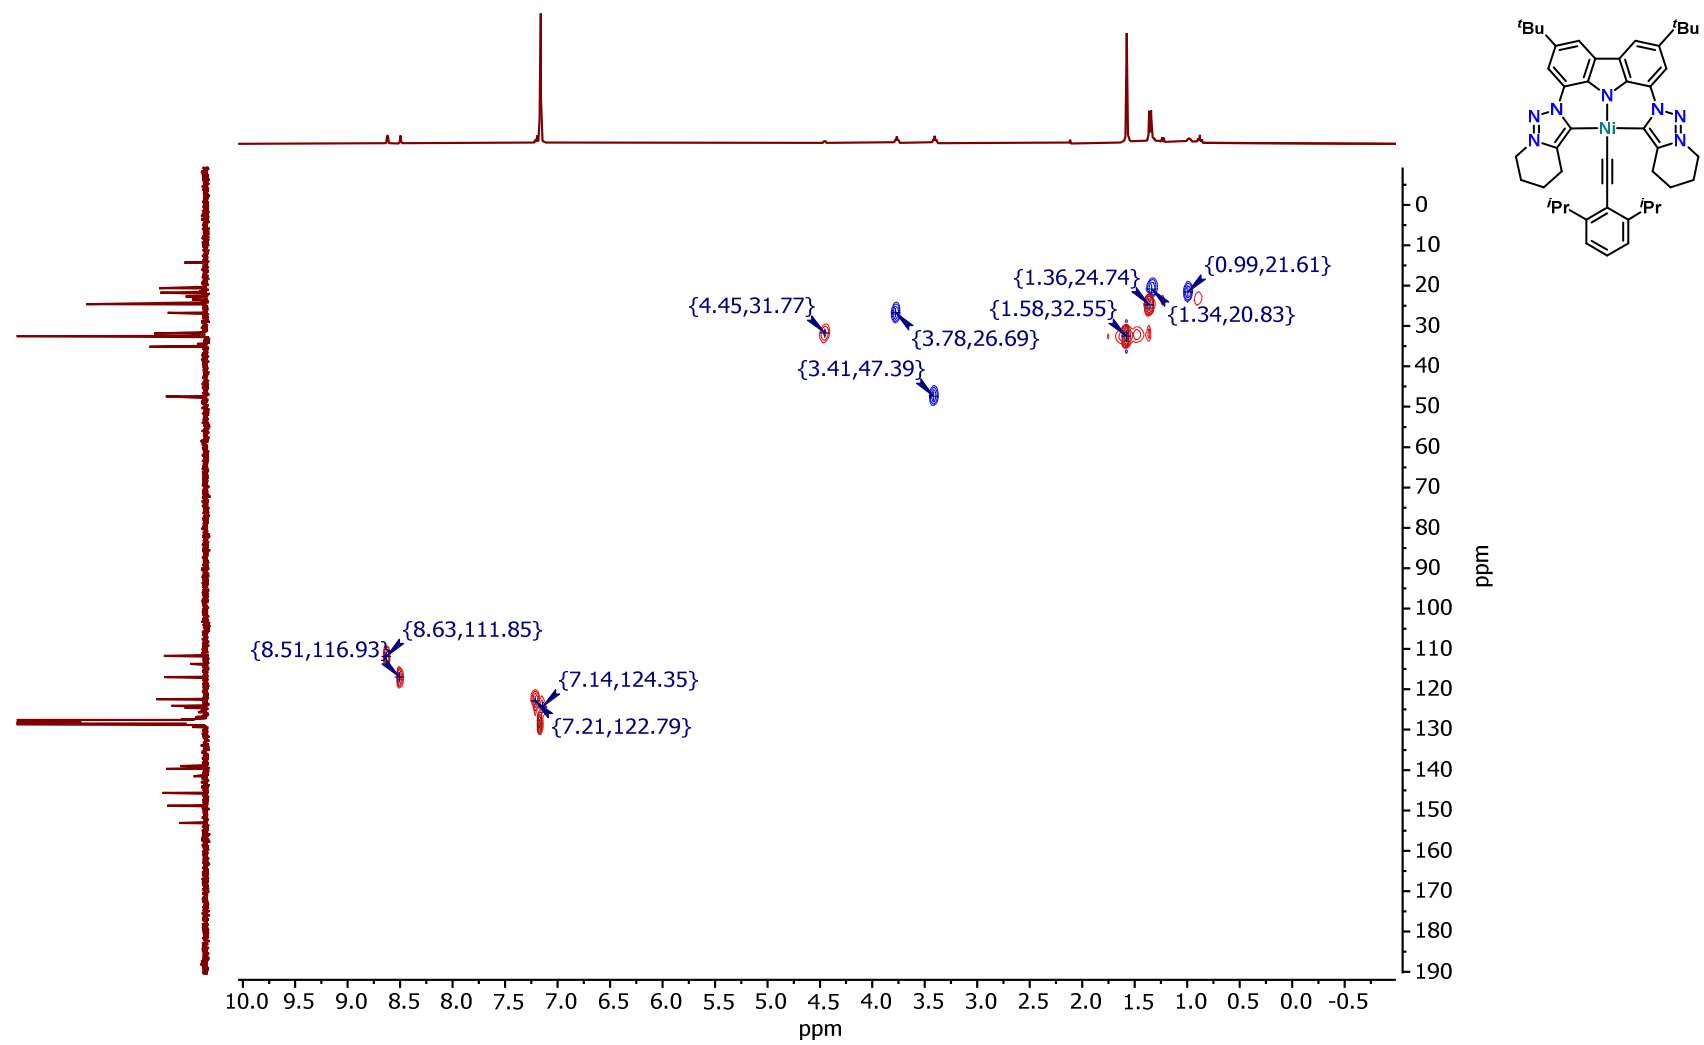

Figure S 52:  $^1\text{H} - ^{13}\text{C}$  HSQC of **9** in  $\text{C}_6\text{D}_6$  at 298K.

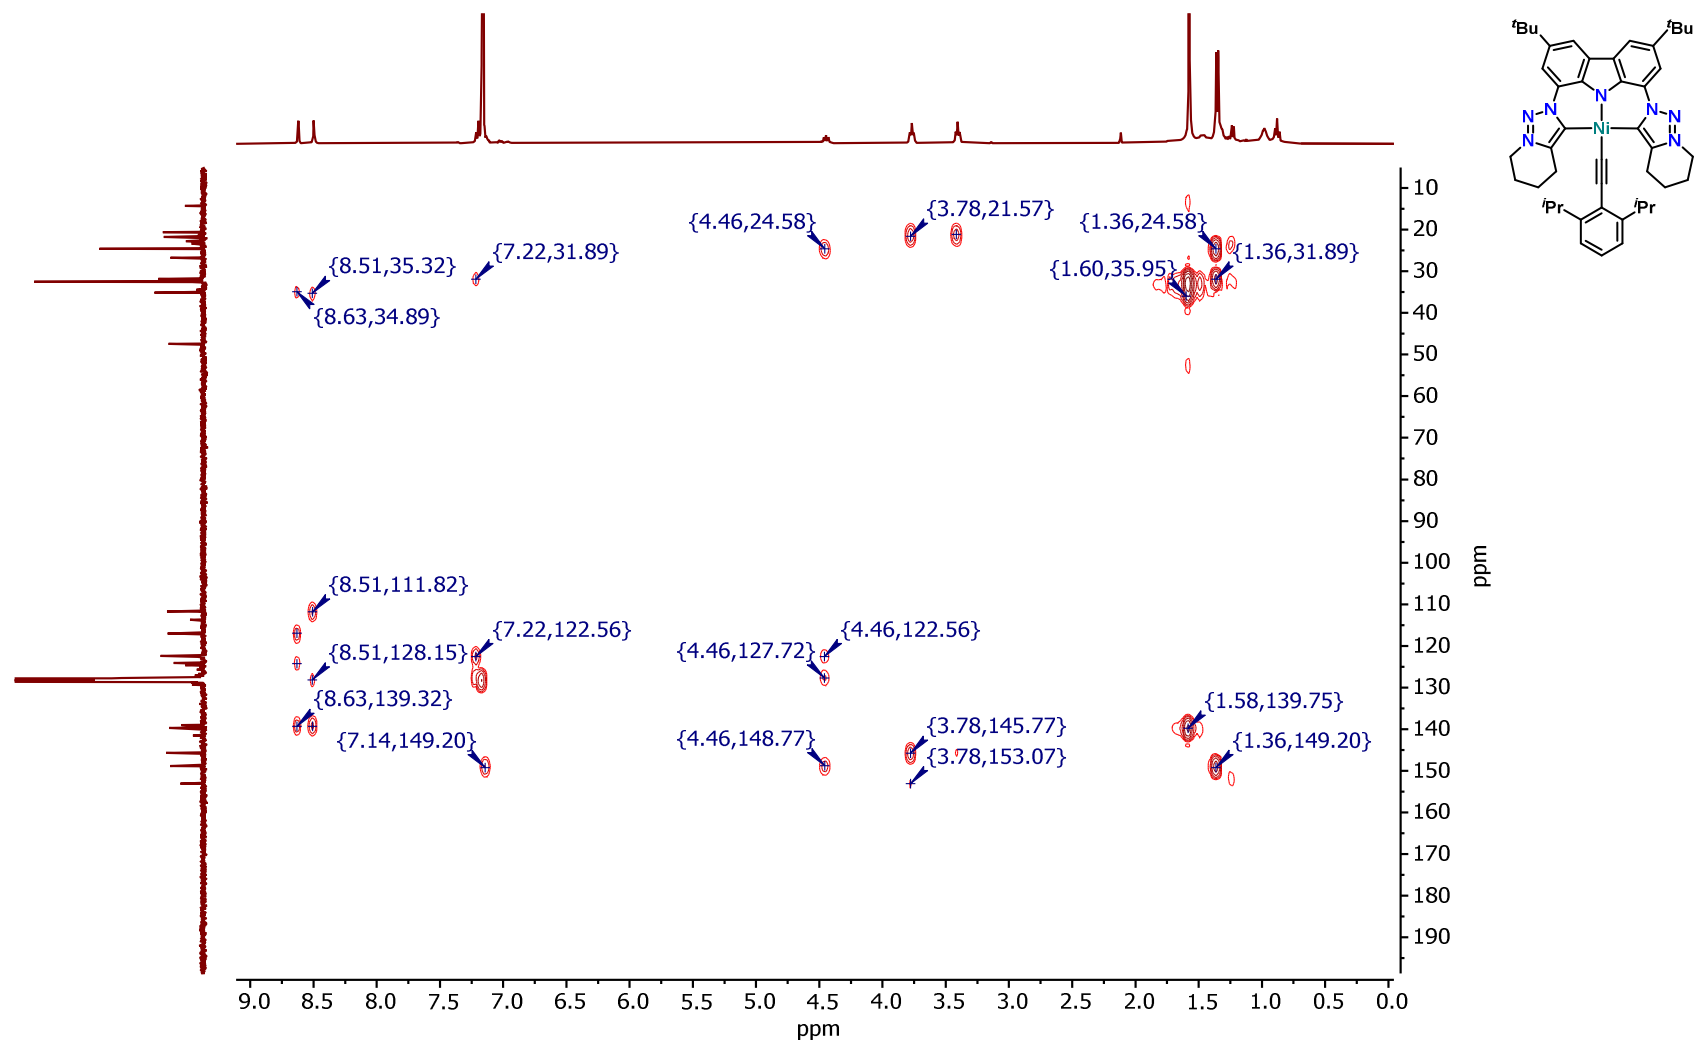

Figure S 53:  $^1\text{H} - ^{13}\text{C}$  HMBC of **9** in  $\text{C}_6\text{D}_6$  at 298K.

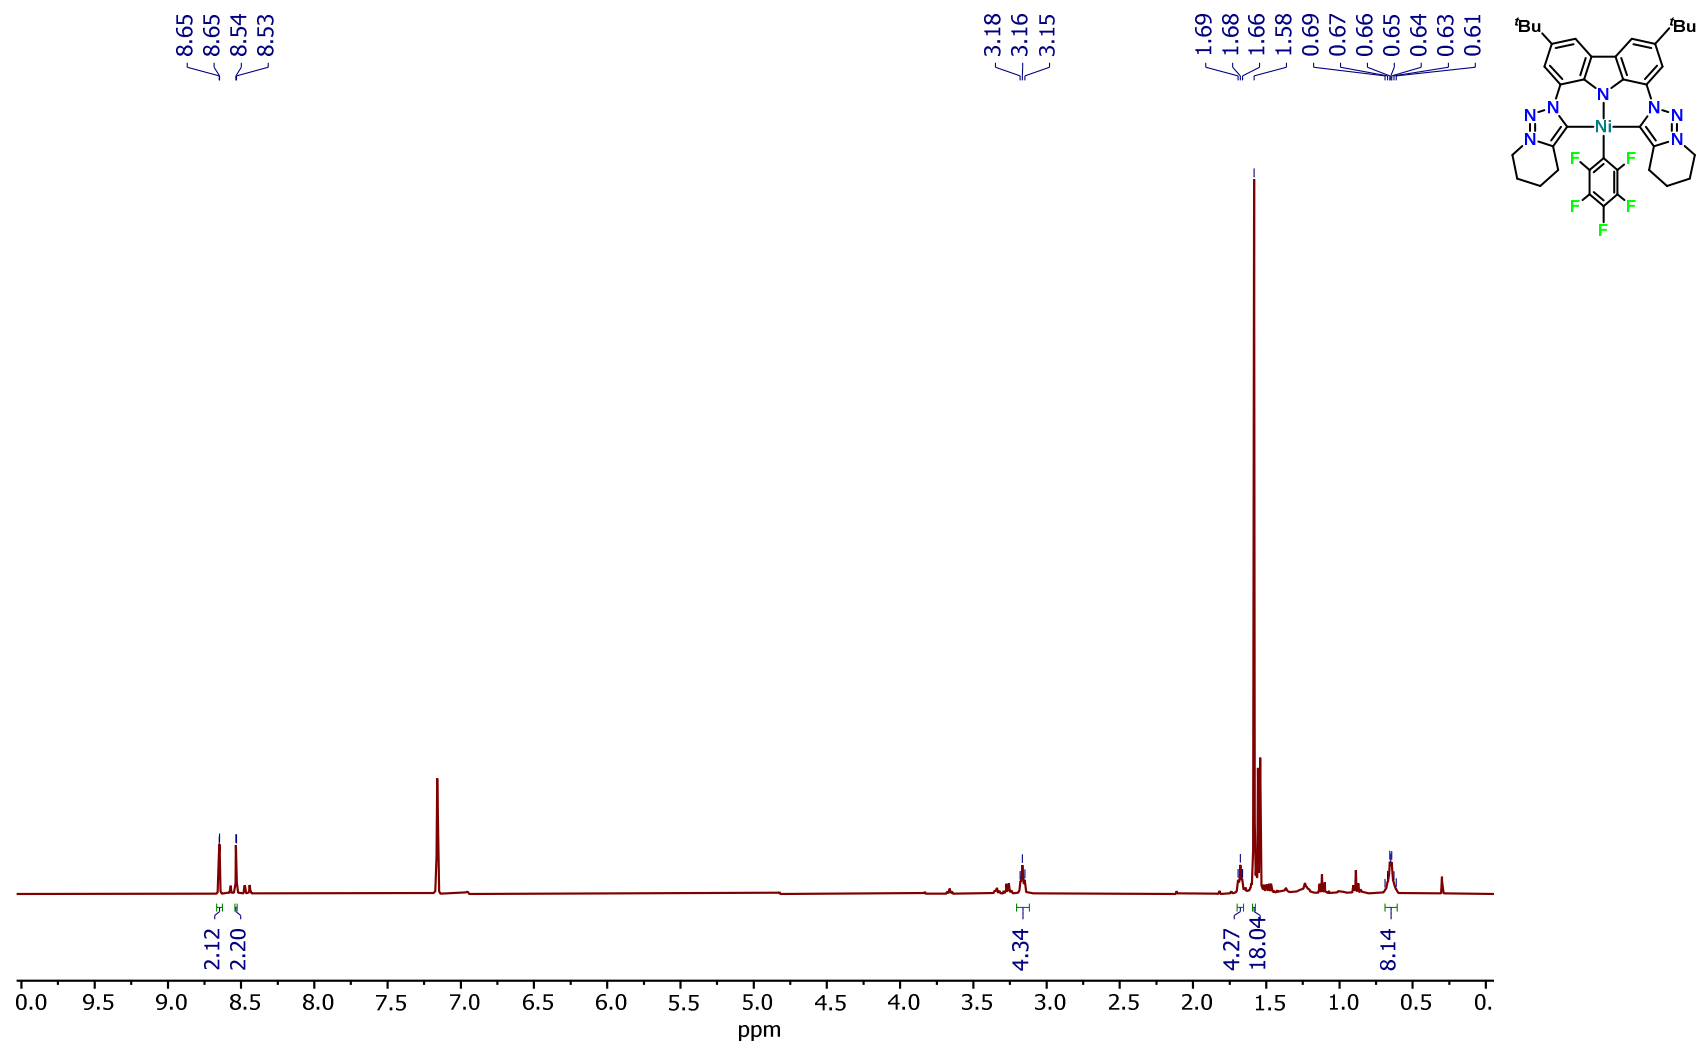

Figure S 54:  $^1\text{H}$  NMR of **10** in  $\text{C}_6\text{D}_6$  at 298K.

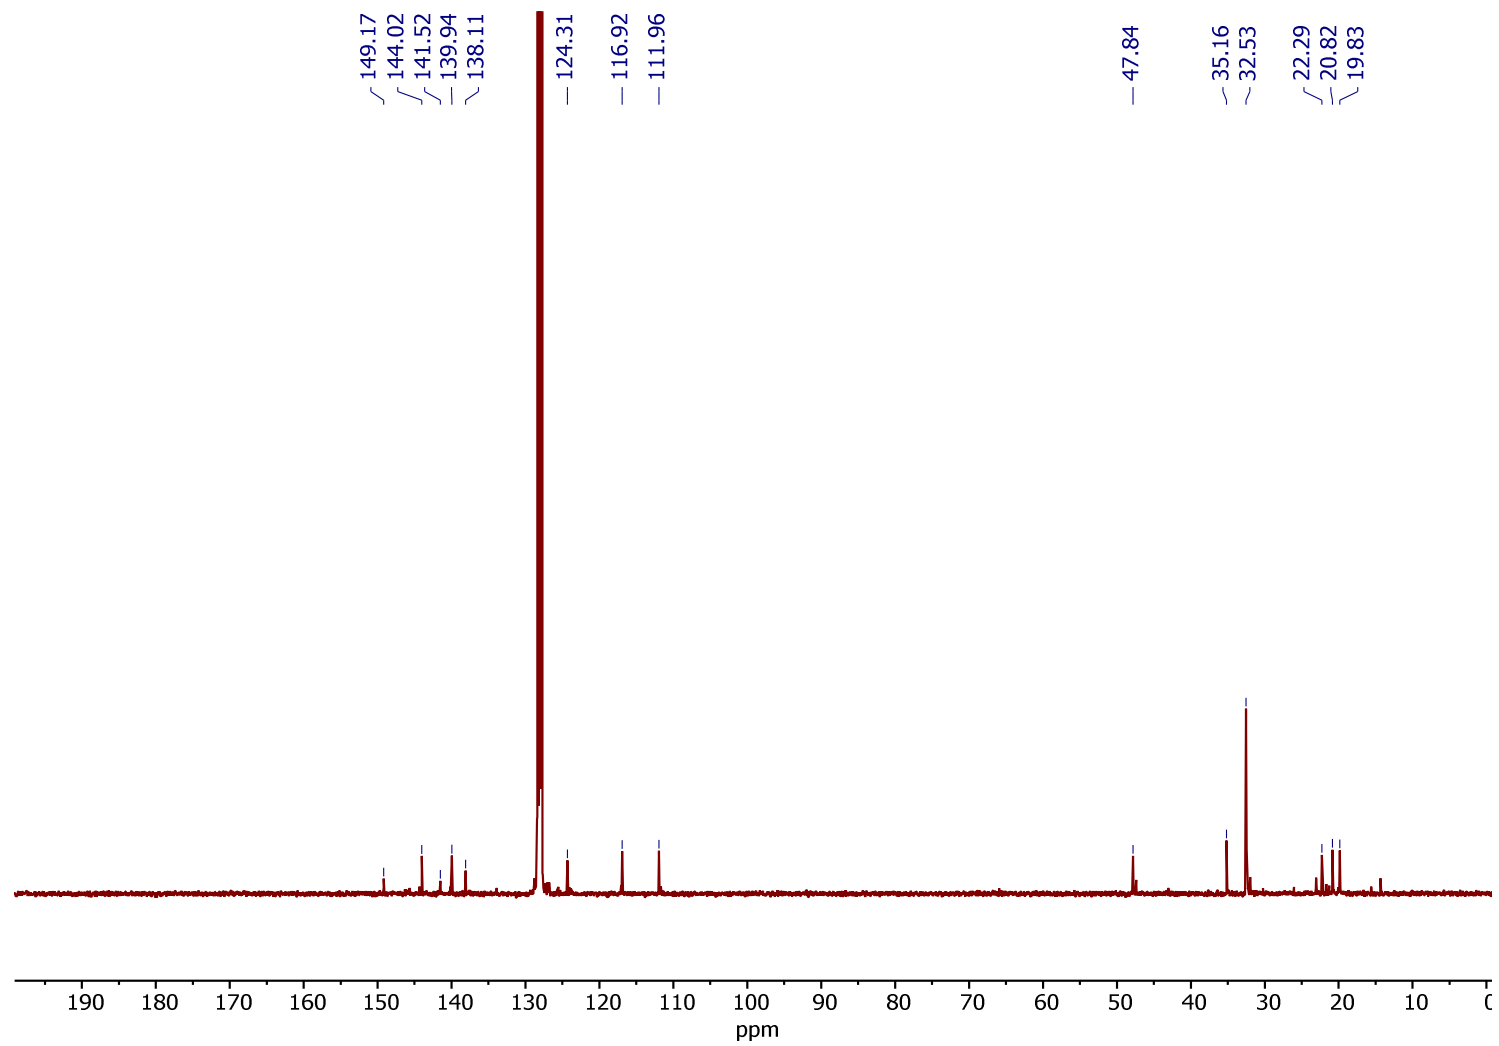

Figure S 55:  $^{13}\text{C}$  NMR of **10** in  $\text{C}_6\text{D}_6$  at 298K.



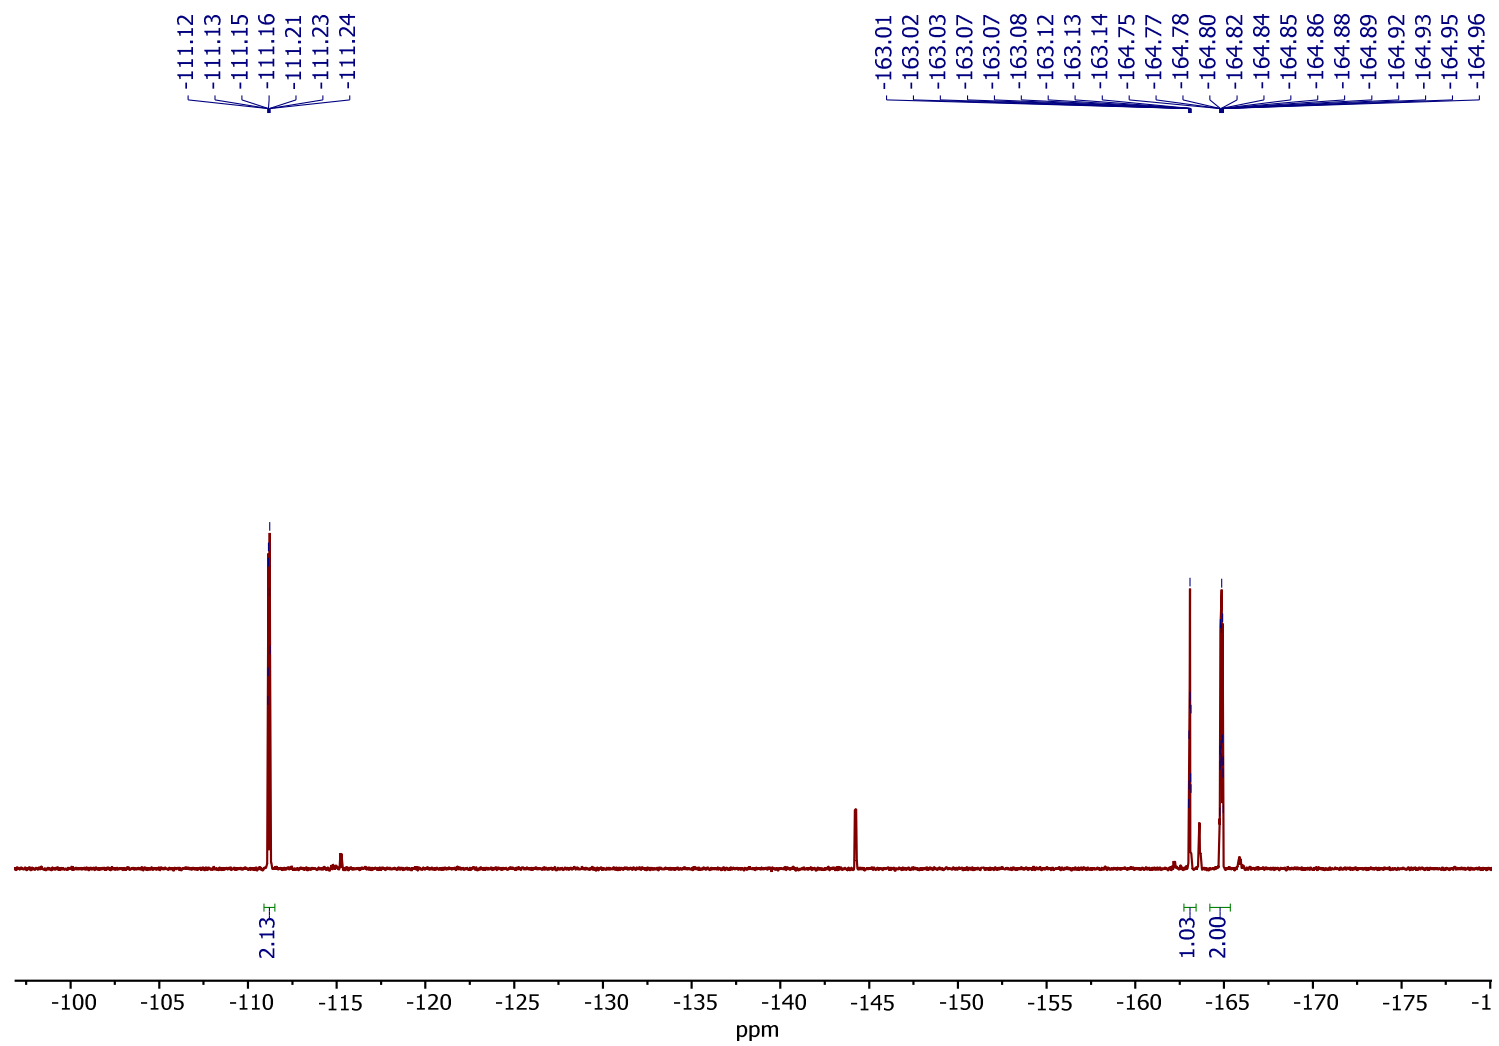

Figure S 56: <sup>19</sup>F NMR of **10** in C<sub>6</sub>D<sub>6</sub> at 298K.

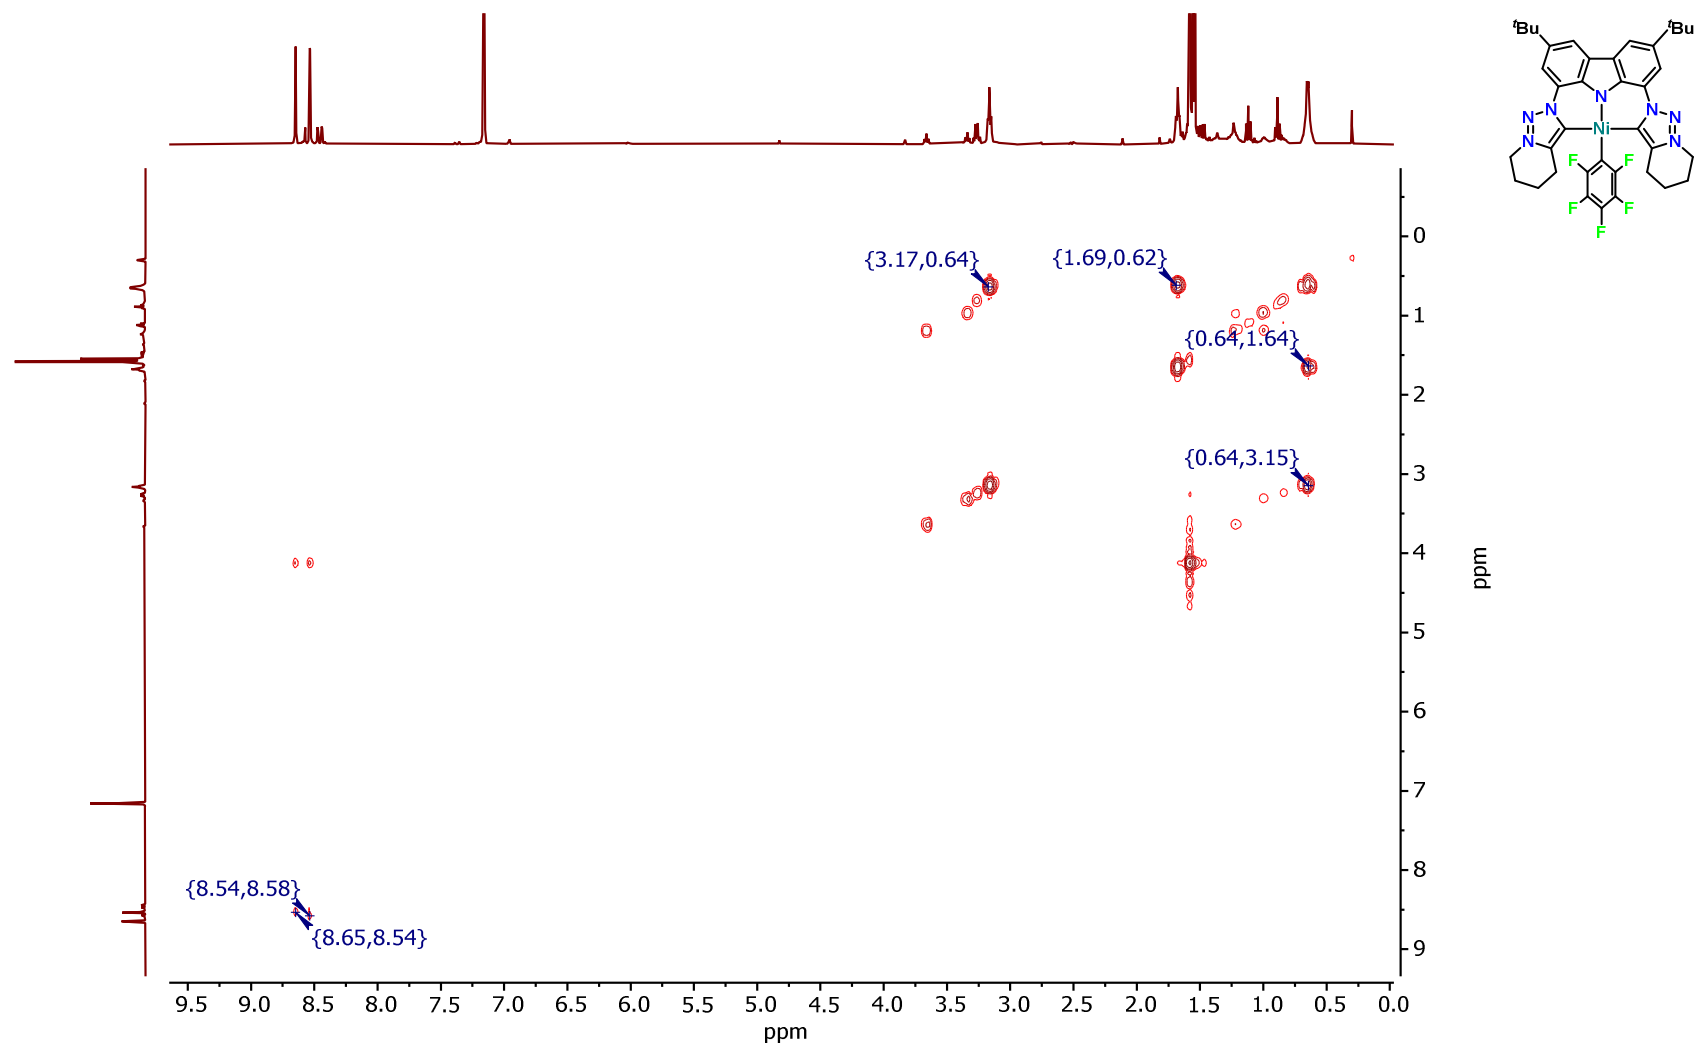

Figure S 57:  $^1\text{H} - ^1\text{H}$  COSY of **10** in  $\text{C}_6\text{D}_6$  at 298K.

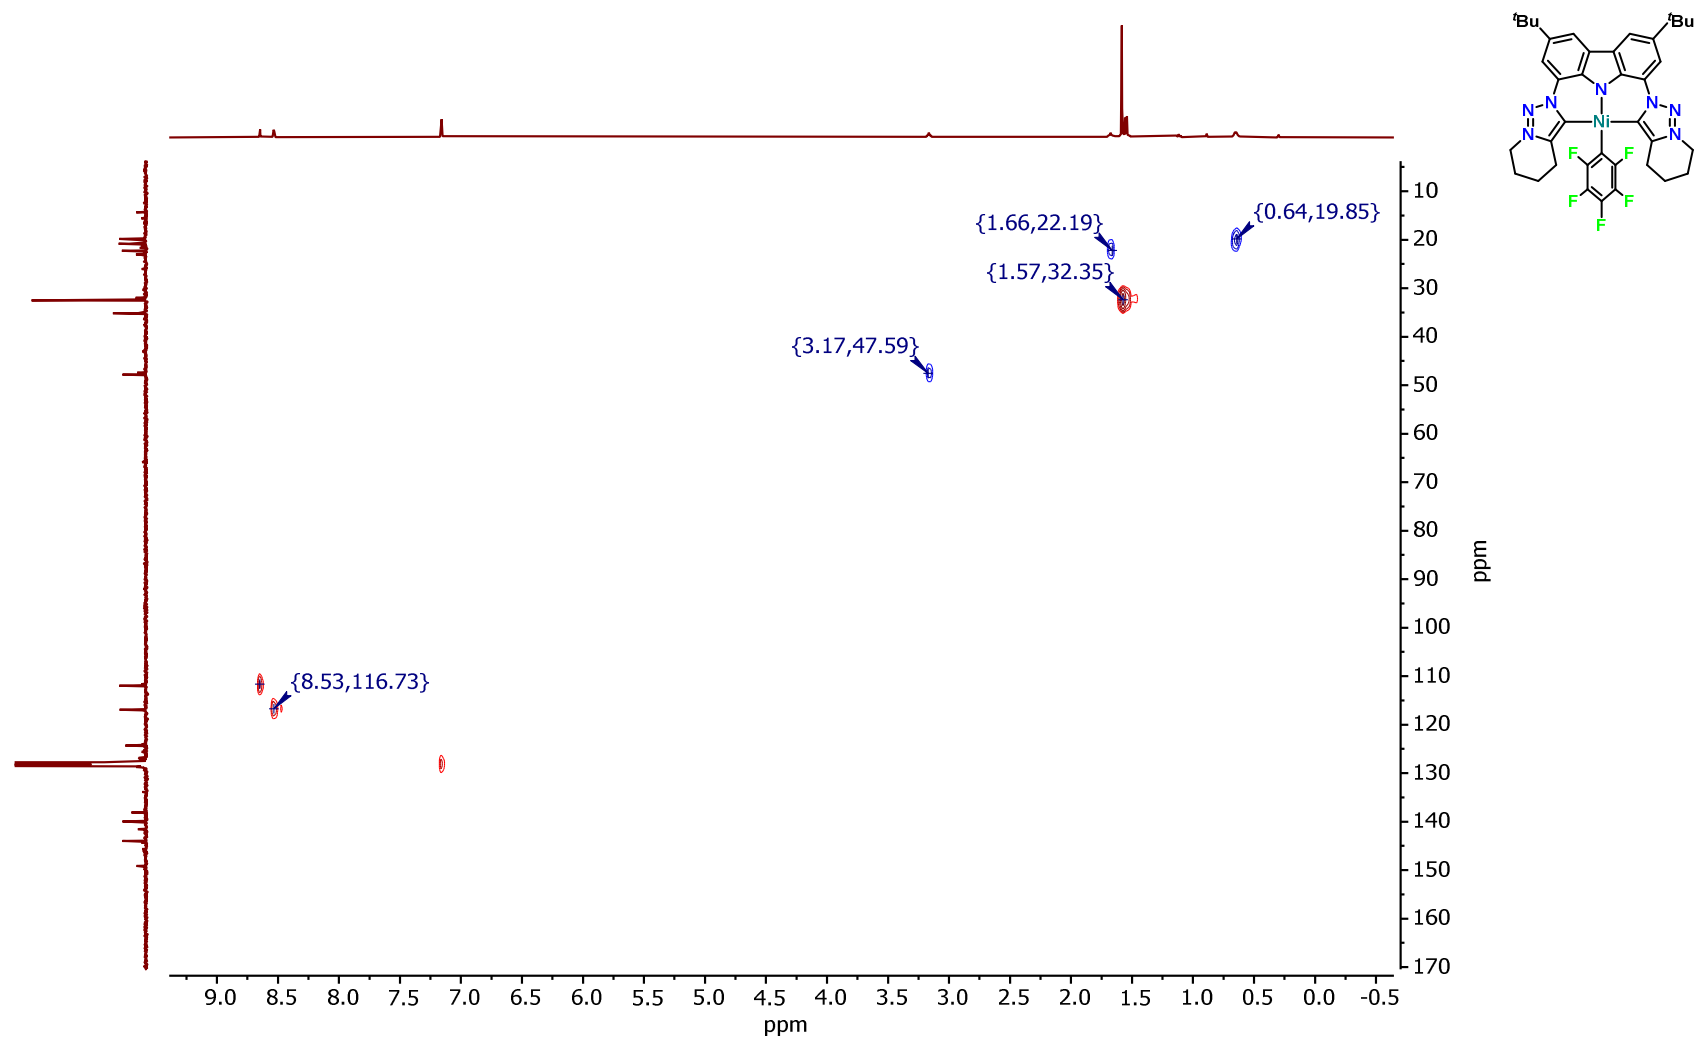

Figure S 58:  $^1\text{H} - ^{13}\text{C}$  HSQC of **10** in  $\text{C}_6\text{D}_6$  at 298K.

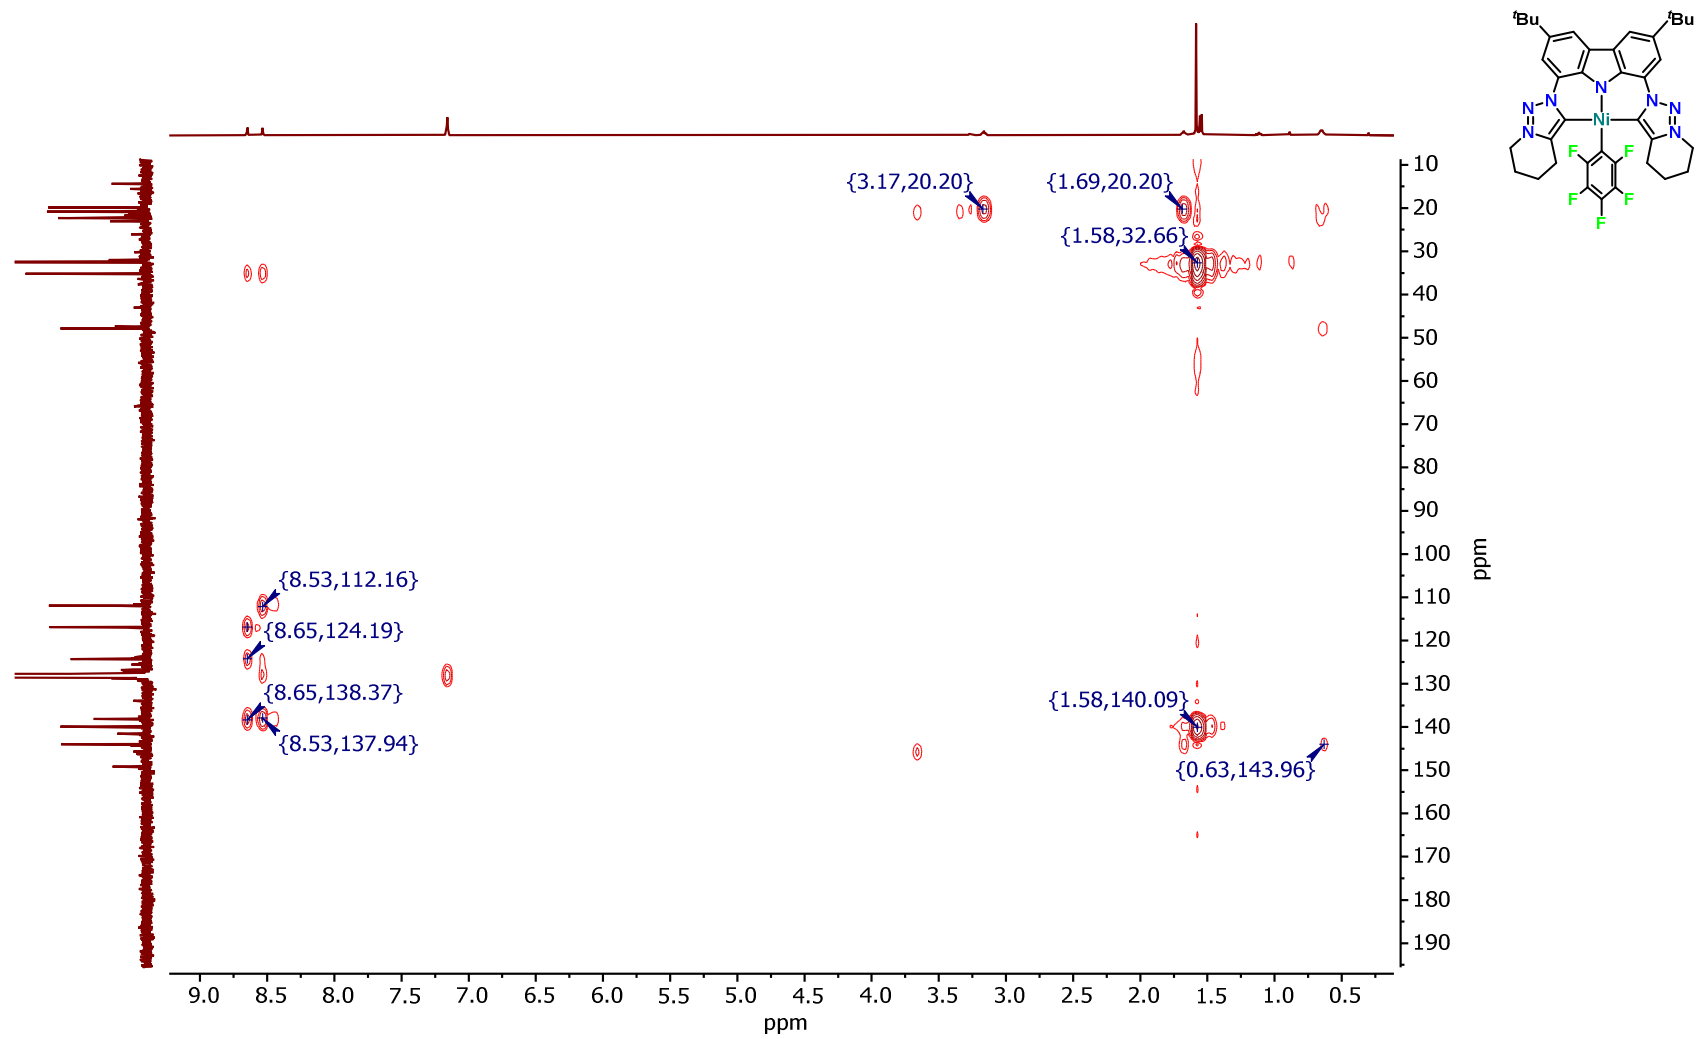

Figure S 59:  $^1\text{H}$  -  $^{13}\text{C}$  HMBC of **10** in  $\text{C}_6\text{D}_6$  at 298K.

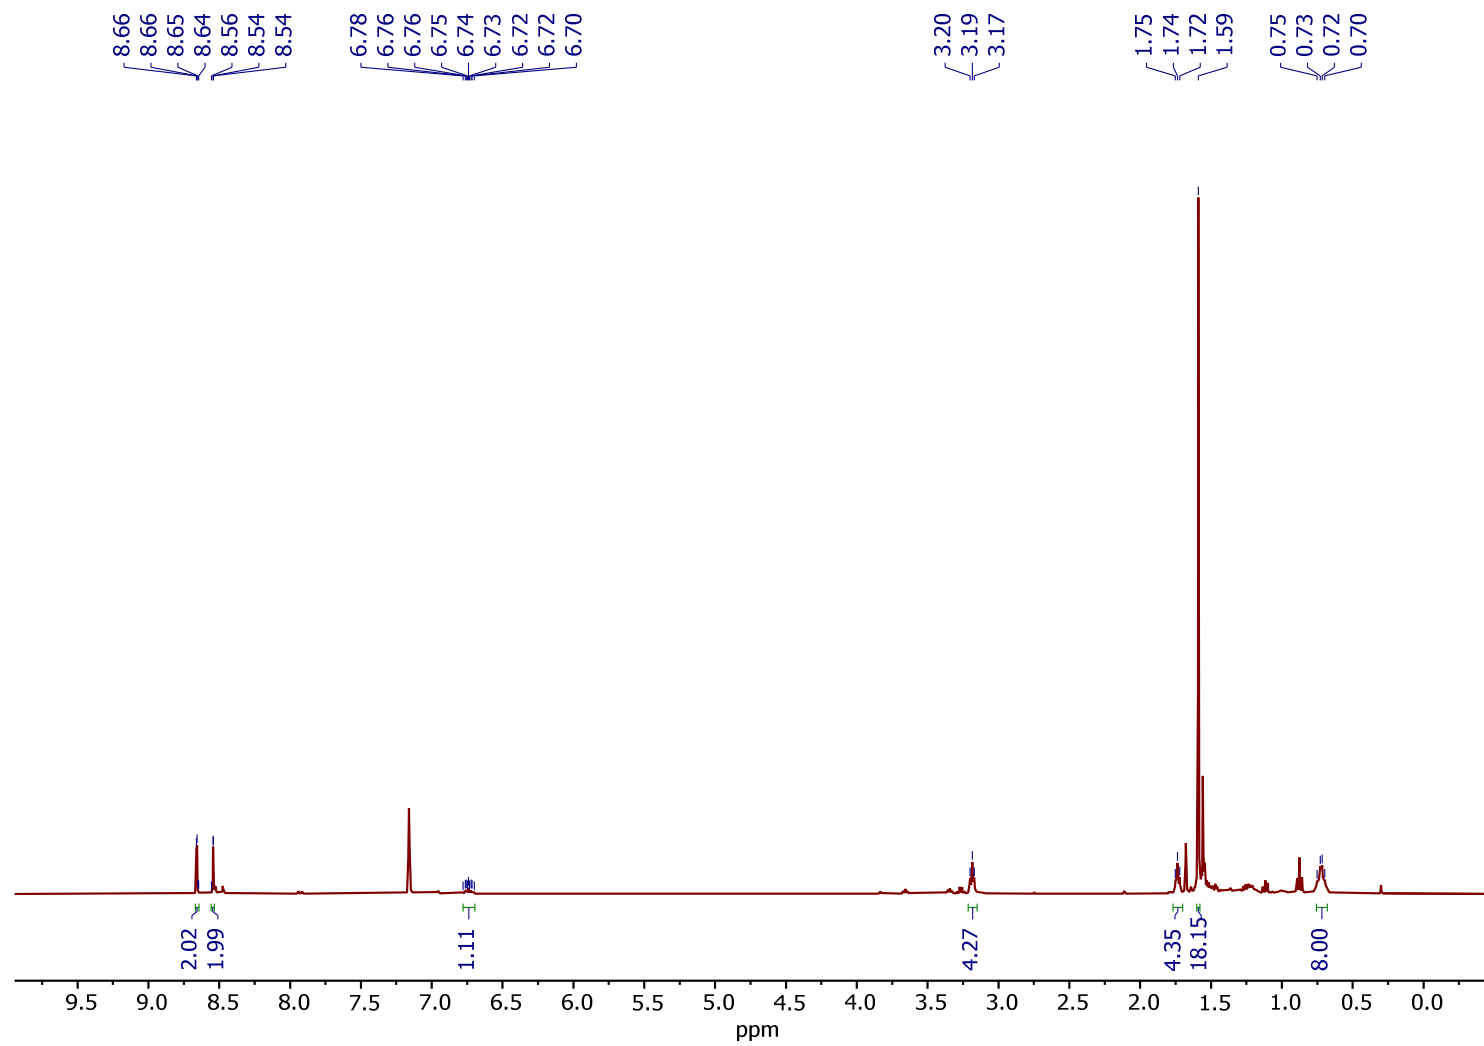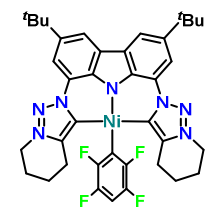

Figure S 60:  $^1\text{H}$  NMR of **11** in  $\text{C}_6\text{D}_6$  at 298K.

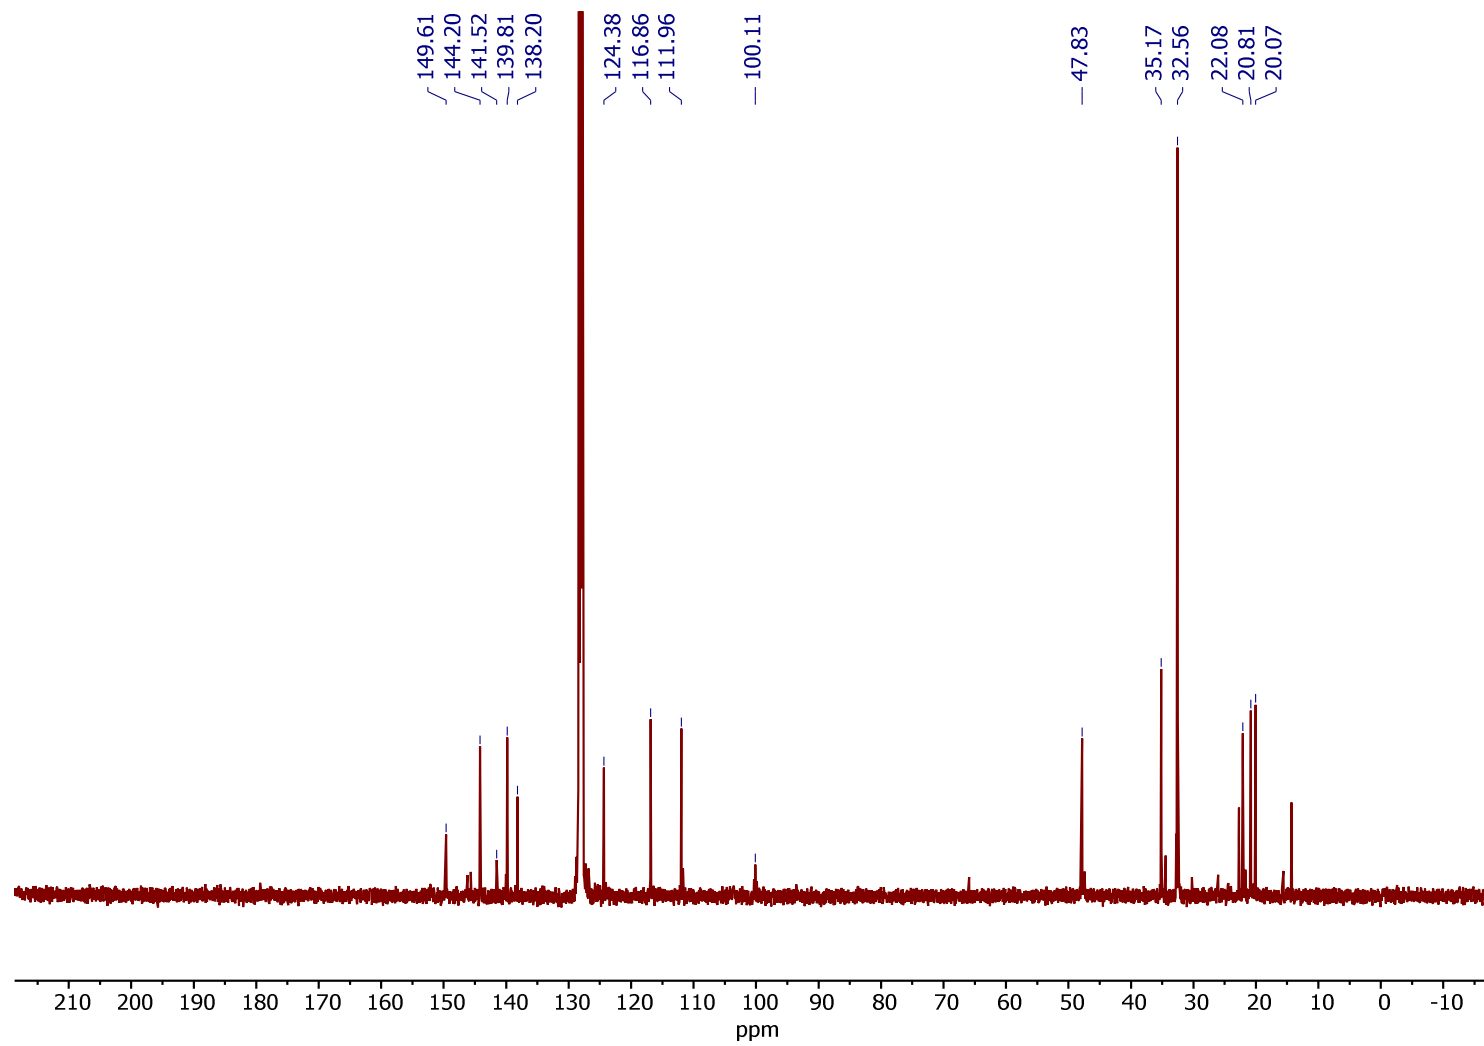

Figure S 61:  $^{13}\text{C}$  NMR of **11** in  $\text{C}_6\text{D}_6$  at 298K.

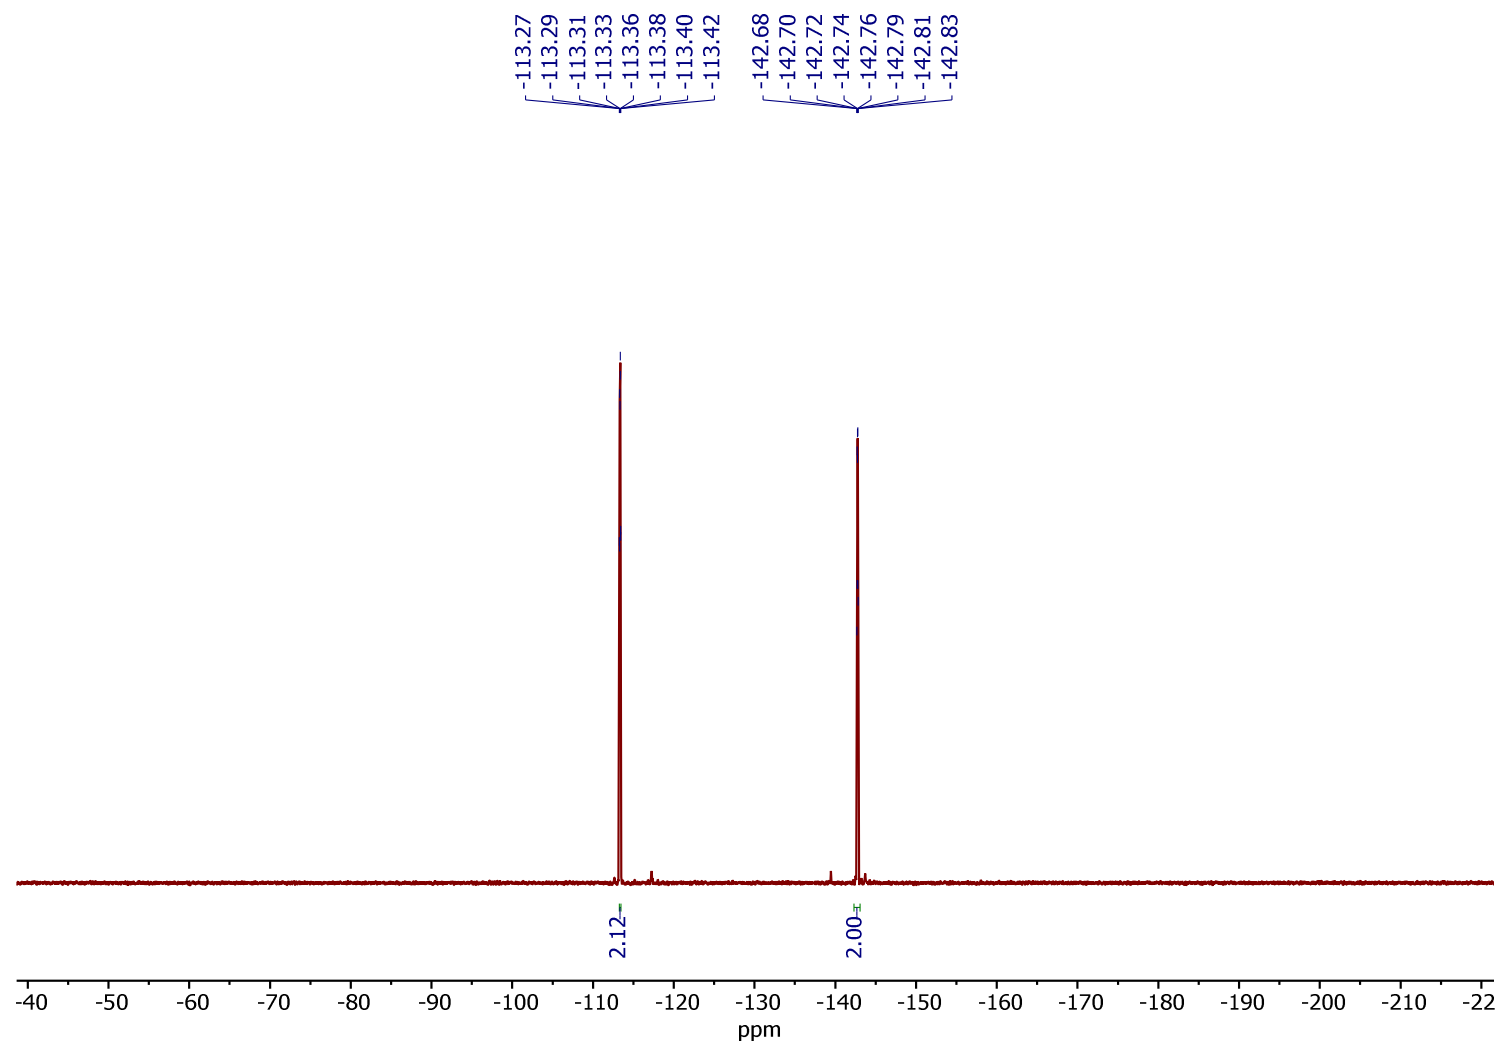

Figure S 62:  $^{19}\text{F}$  NMR of **11** in  $\text{C}_6\text{D}_6$  at 298K.

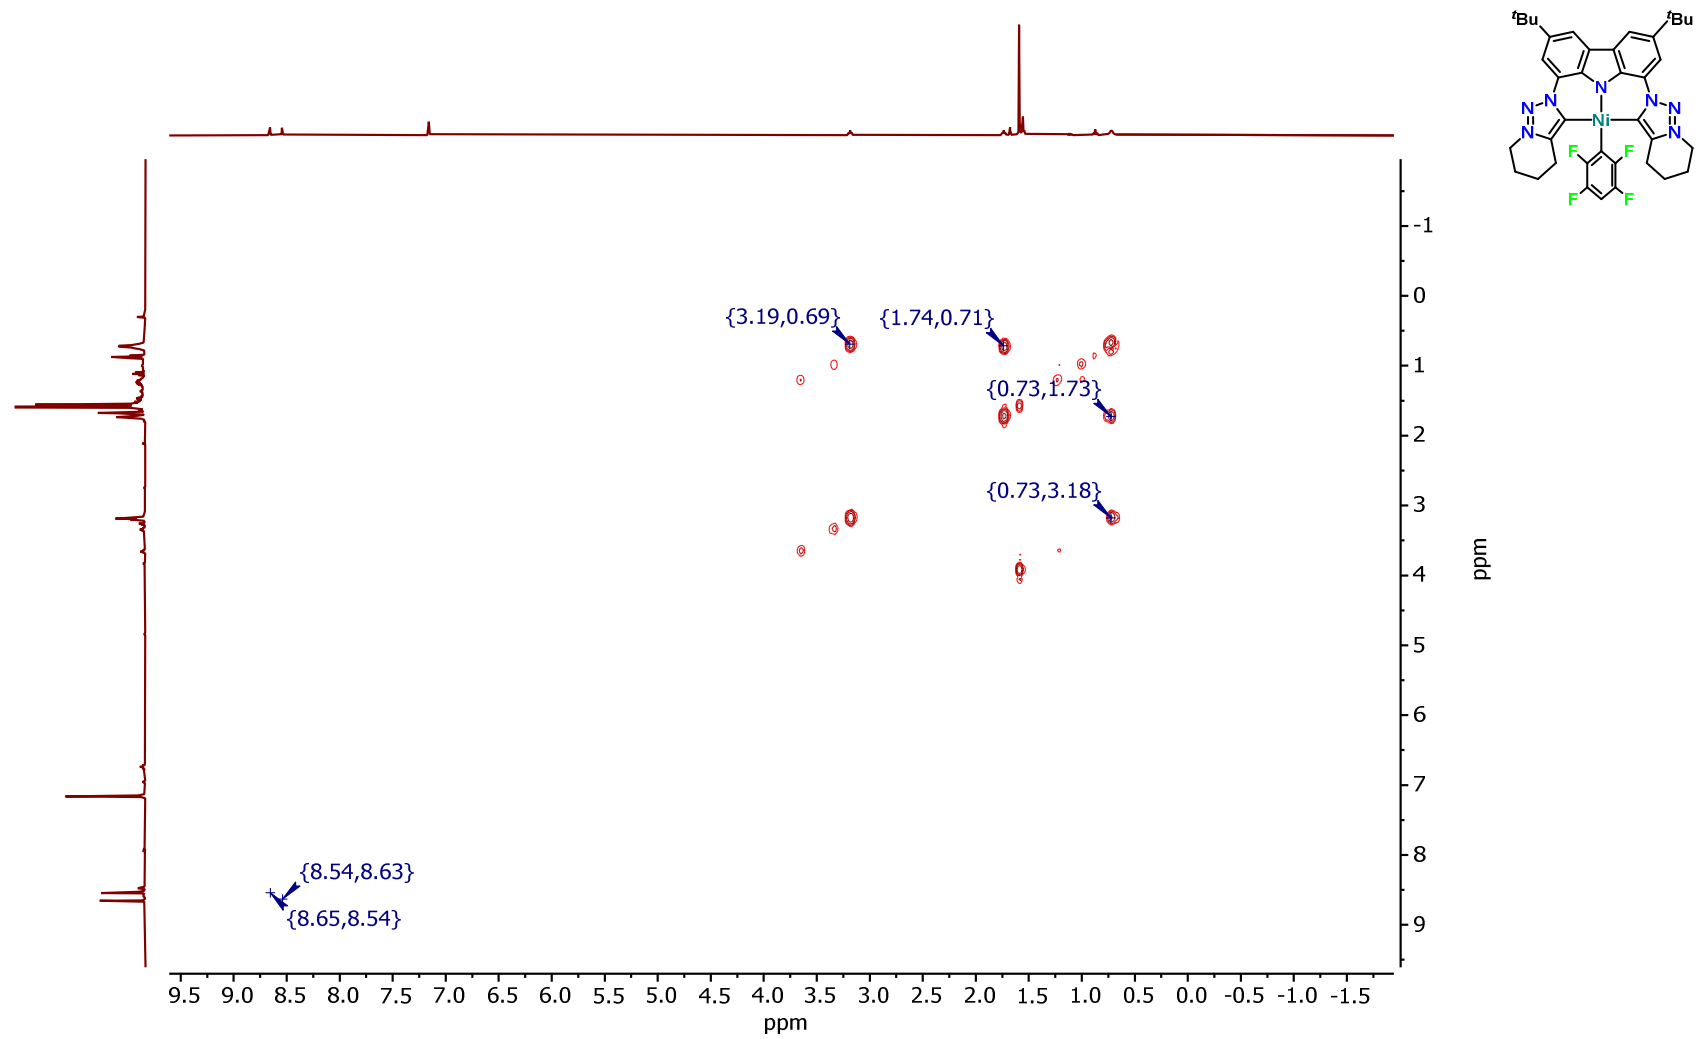

Figure S 63:  $^1\text{H} - ^1\text{H}$  COSY of **11** in  $\text{C}_6\text{D}_6$  at 298K.



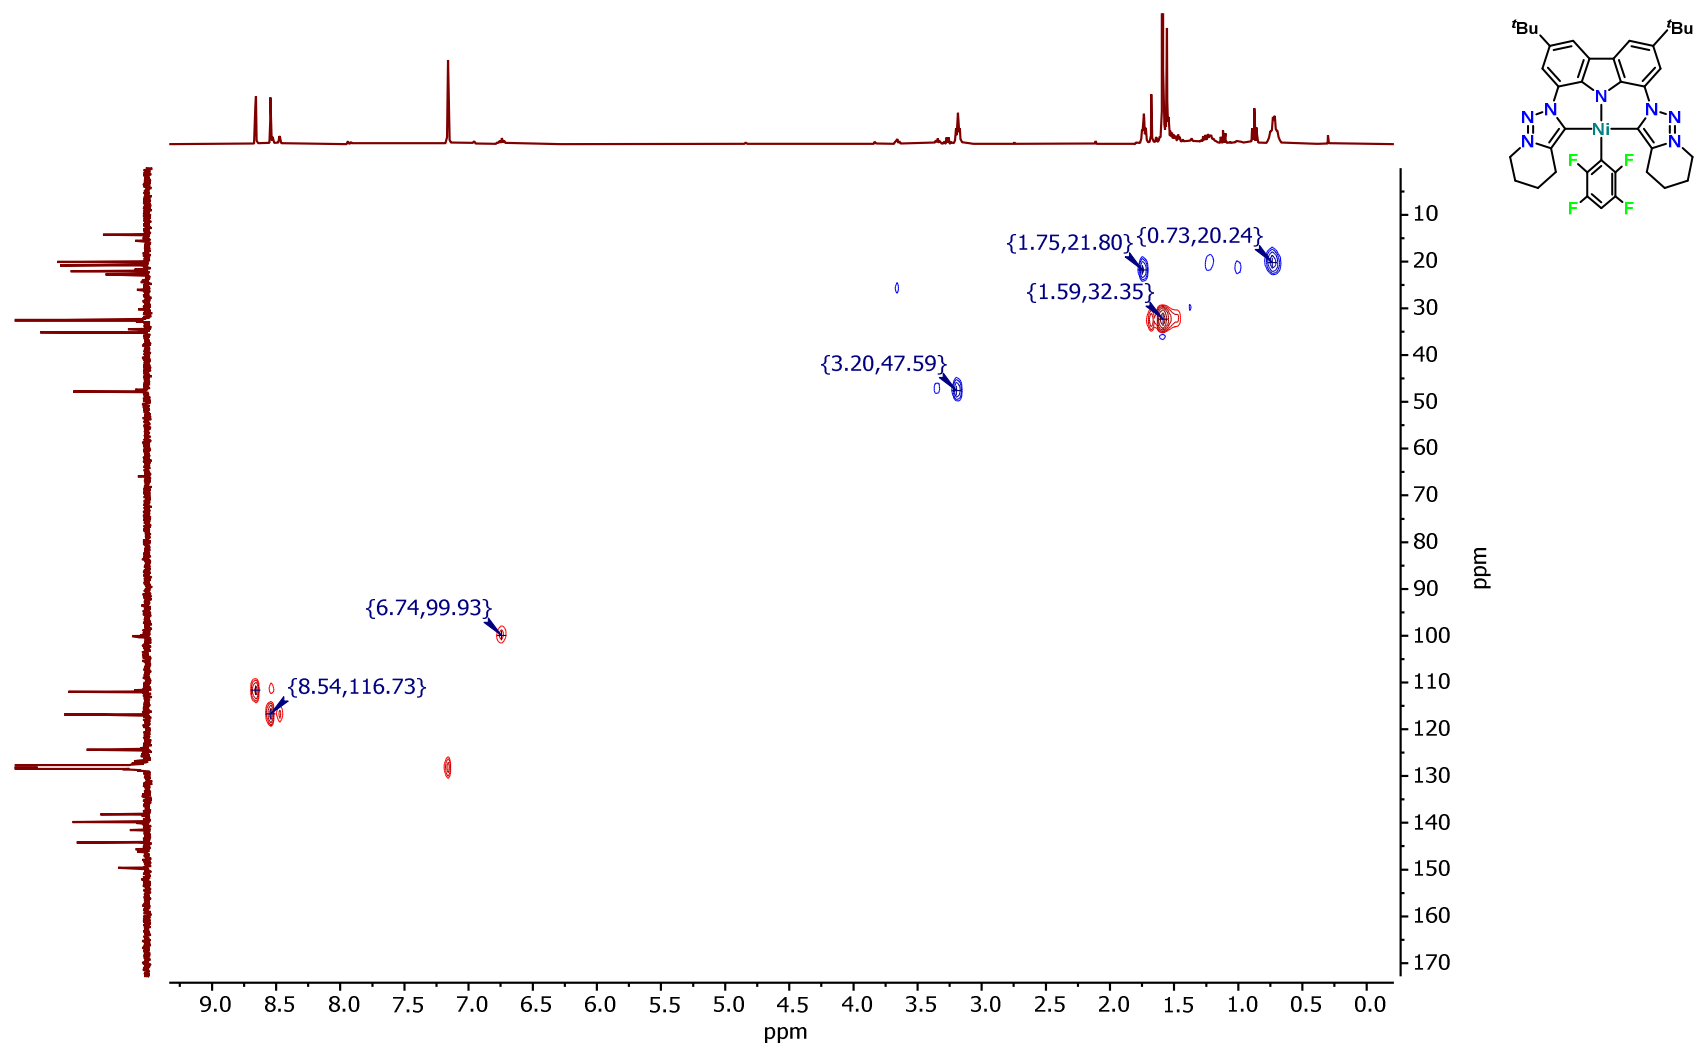

Figure S 64:  $^1\text{H}$  -  $^{13}\text{C}$  HSQC of **11** in  $\text{C}_6\text{D}_6$  at 298K.

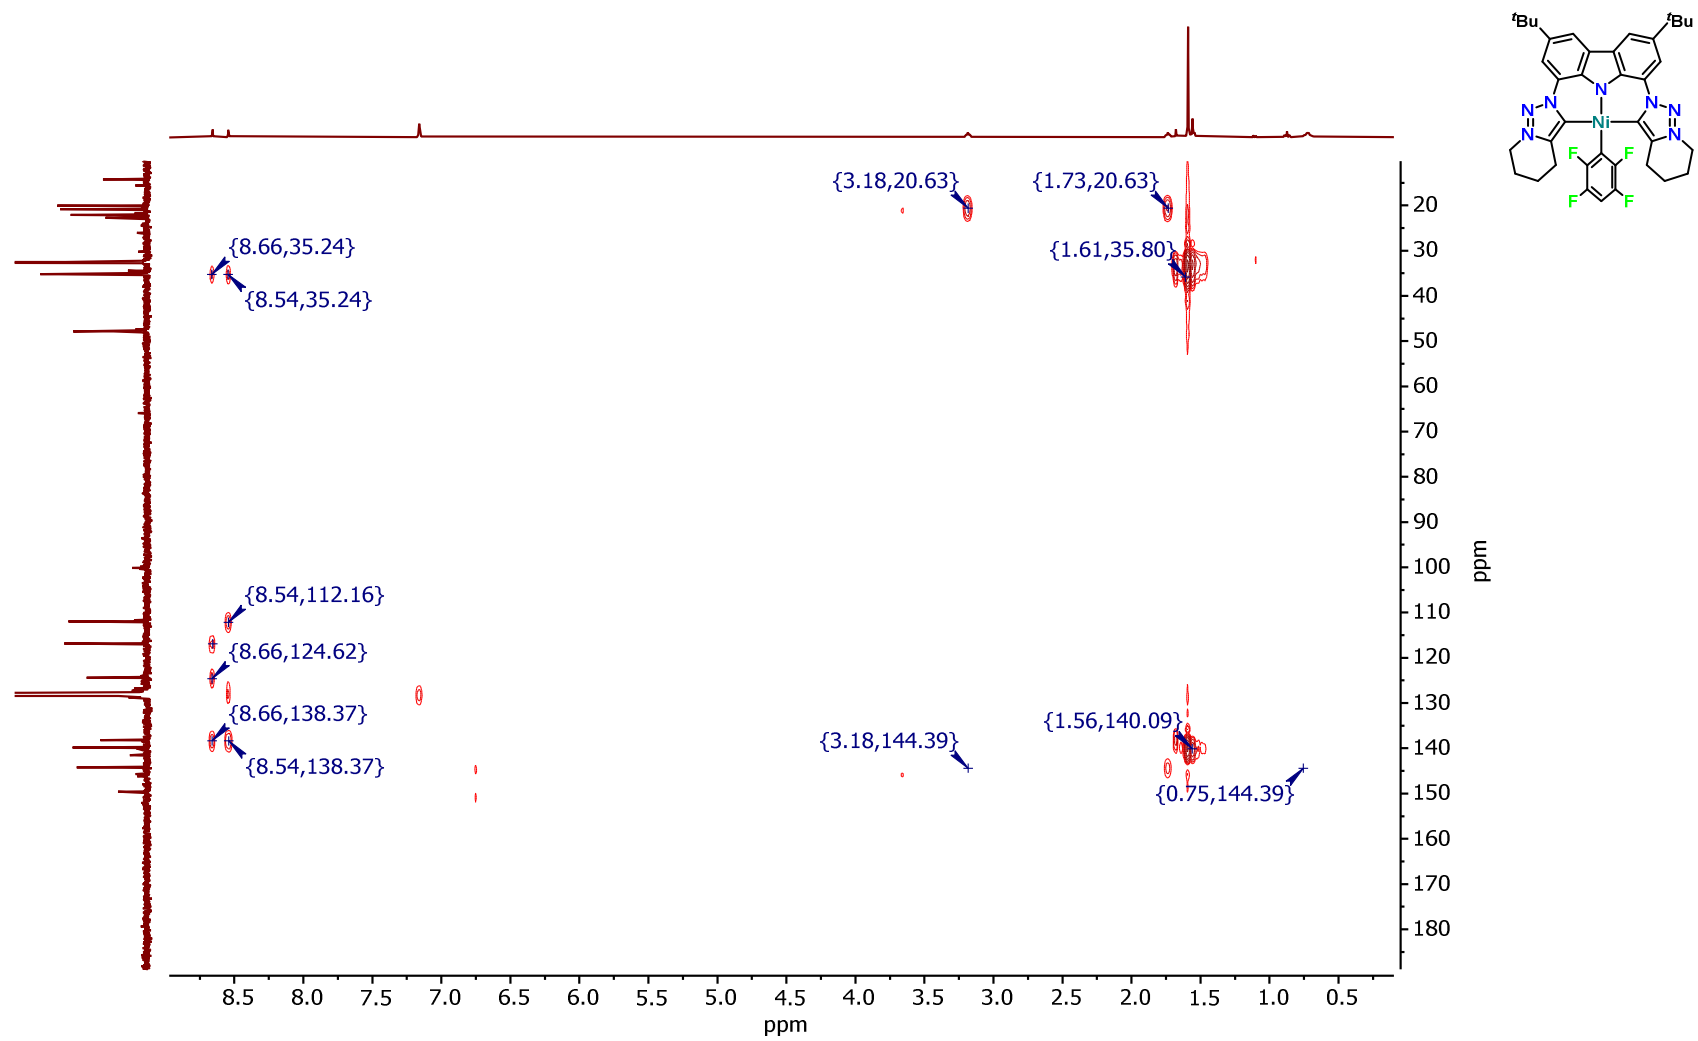

Figure S 65:  $^1\text{H} - ^{13}\text{C}$  HMBC of **11** in  $\text{C}_6\text{D}_6$  at 298K.

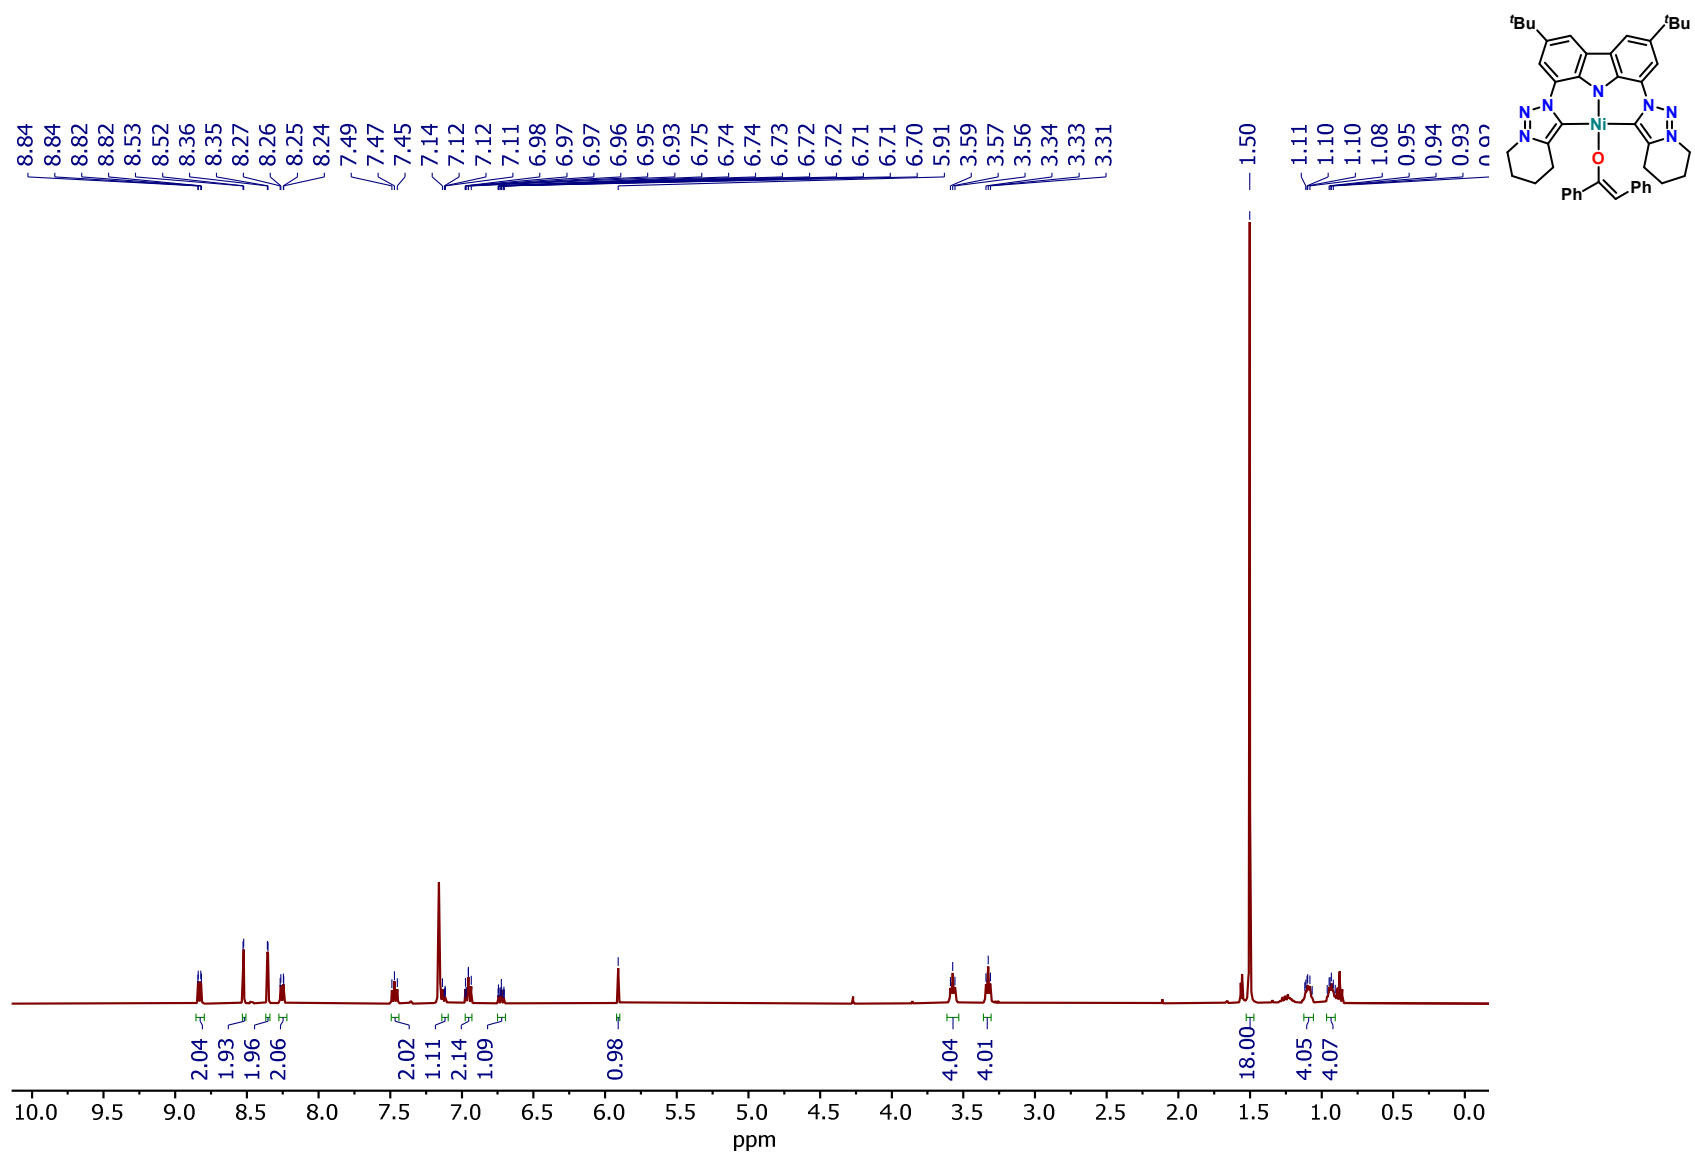

Figure S 66:  $^1\text{H}$  NMR of **12** in  $\text{C}_6\text{D}_6$  at 298K.

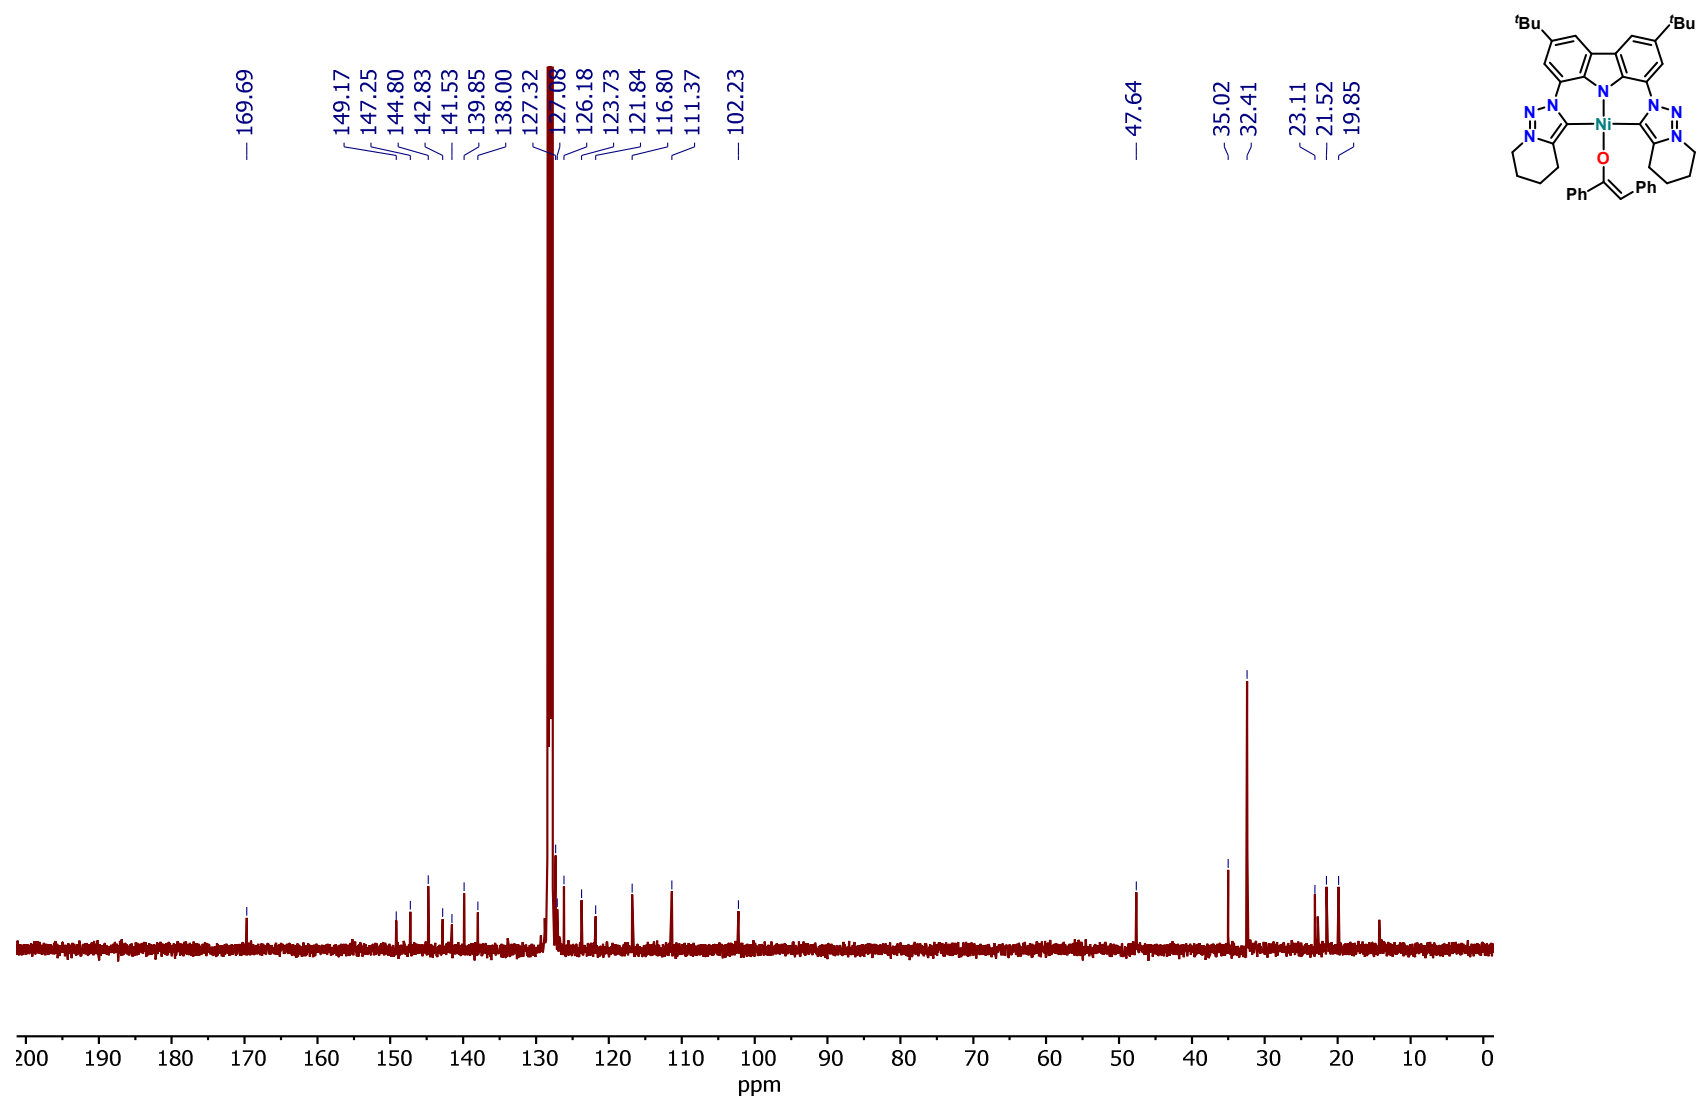

Figure S 67:  $^{13}\text{C}$  NMR of **12** in  $\text{C}_6\text{D}_6$  at 298K.

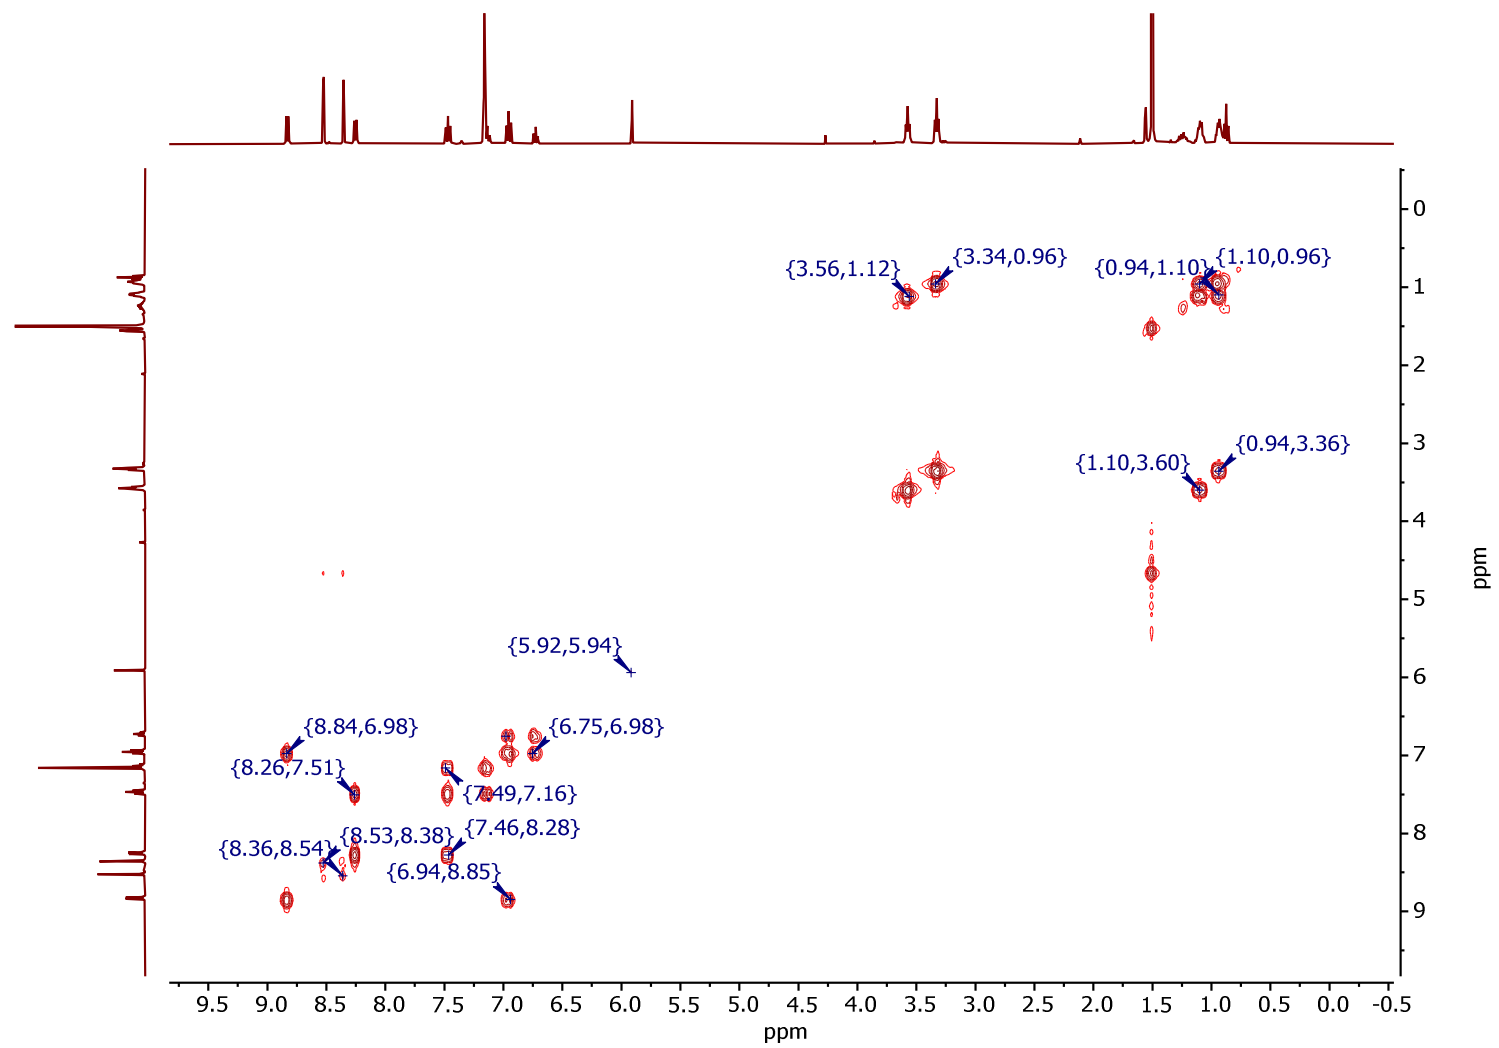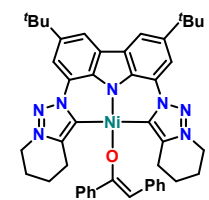

Figure S 68:  $^1\text{H}$  -  $^1\text{H}$  COSY of **12** in  $\text{C}_6\text{D}_6$  at 298K.

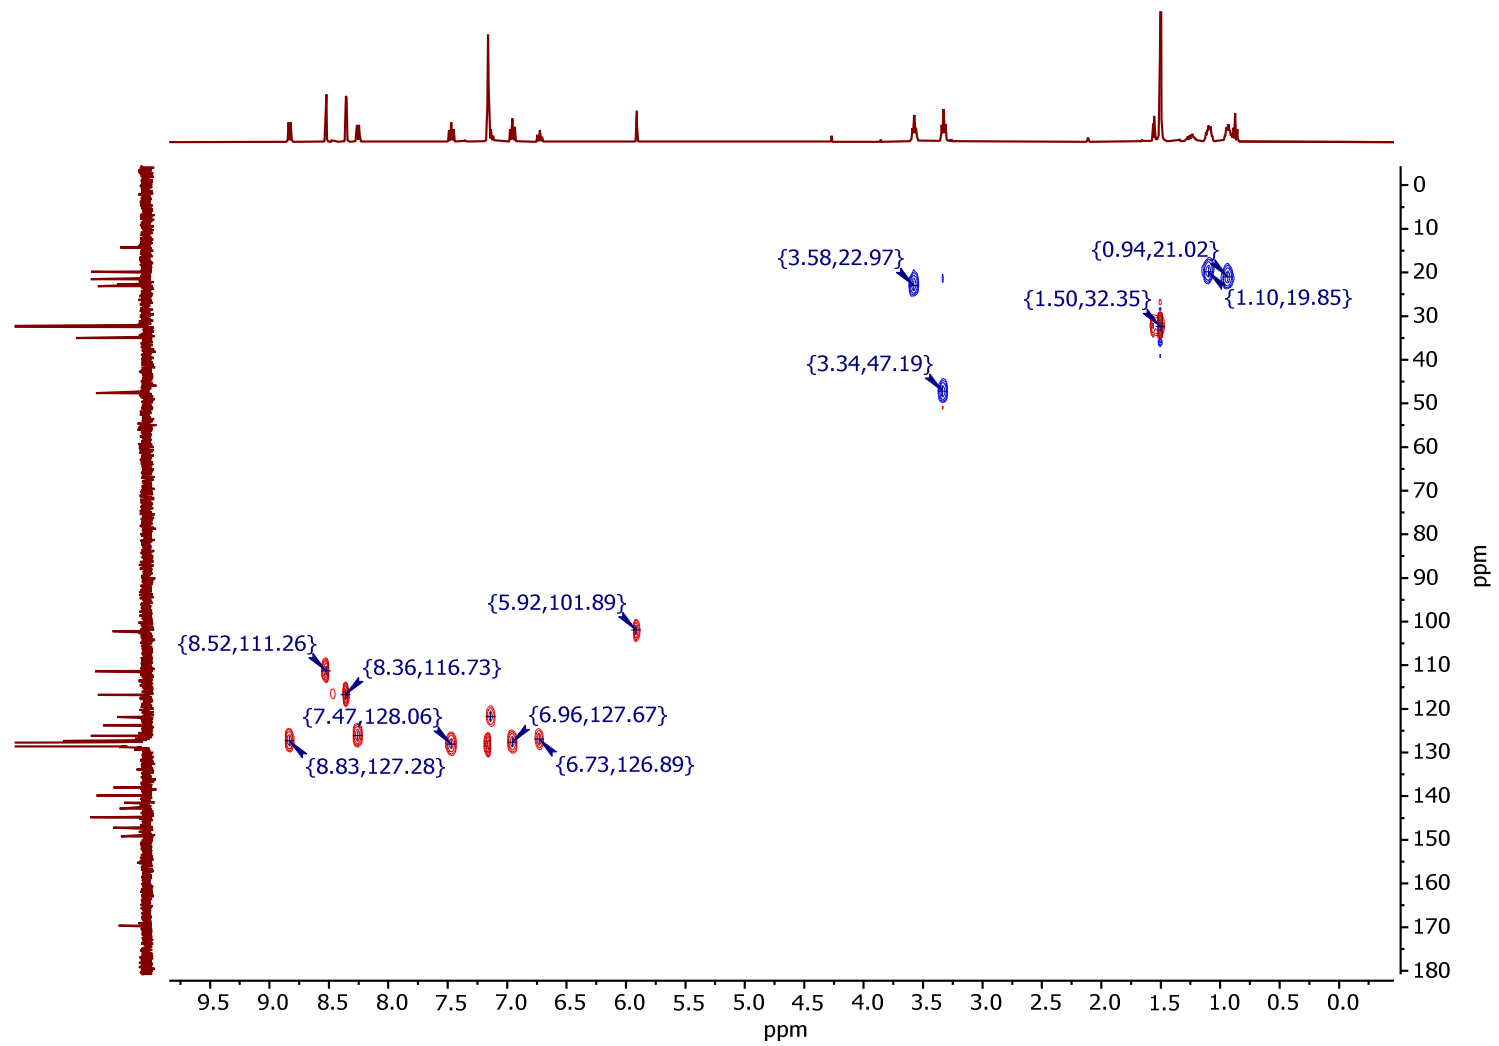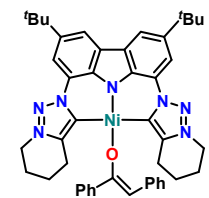

Figure S 69:  $^1\text{H} - ^{13}\text{C}$  HSQC of **12** in  $\text{C}_6\text{D}_6$  at 298K.

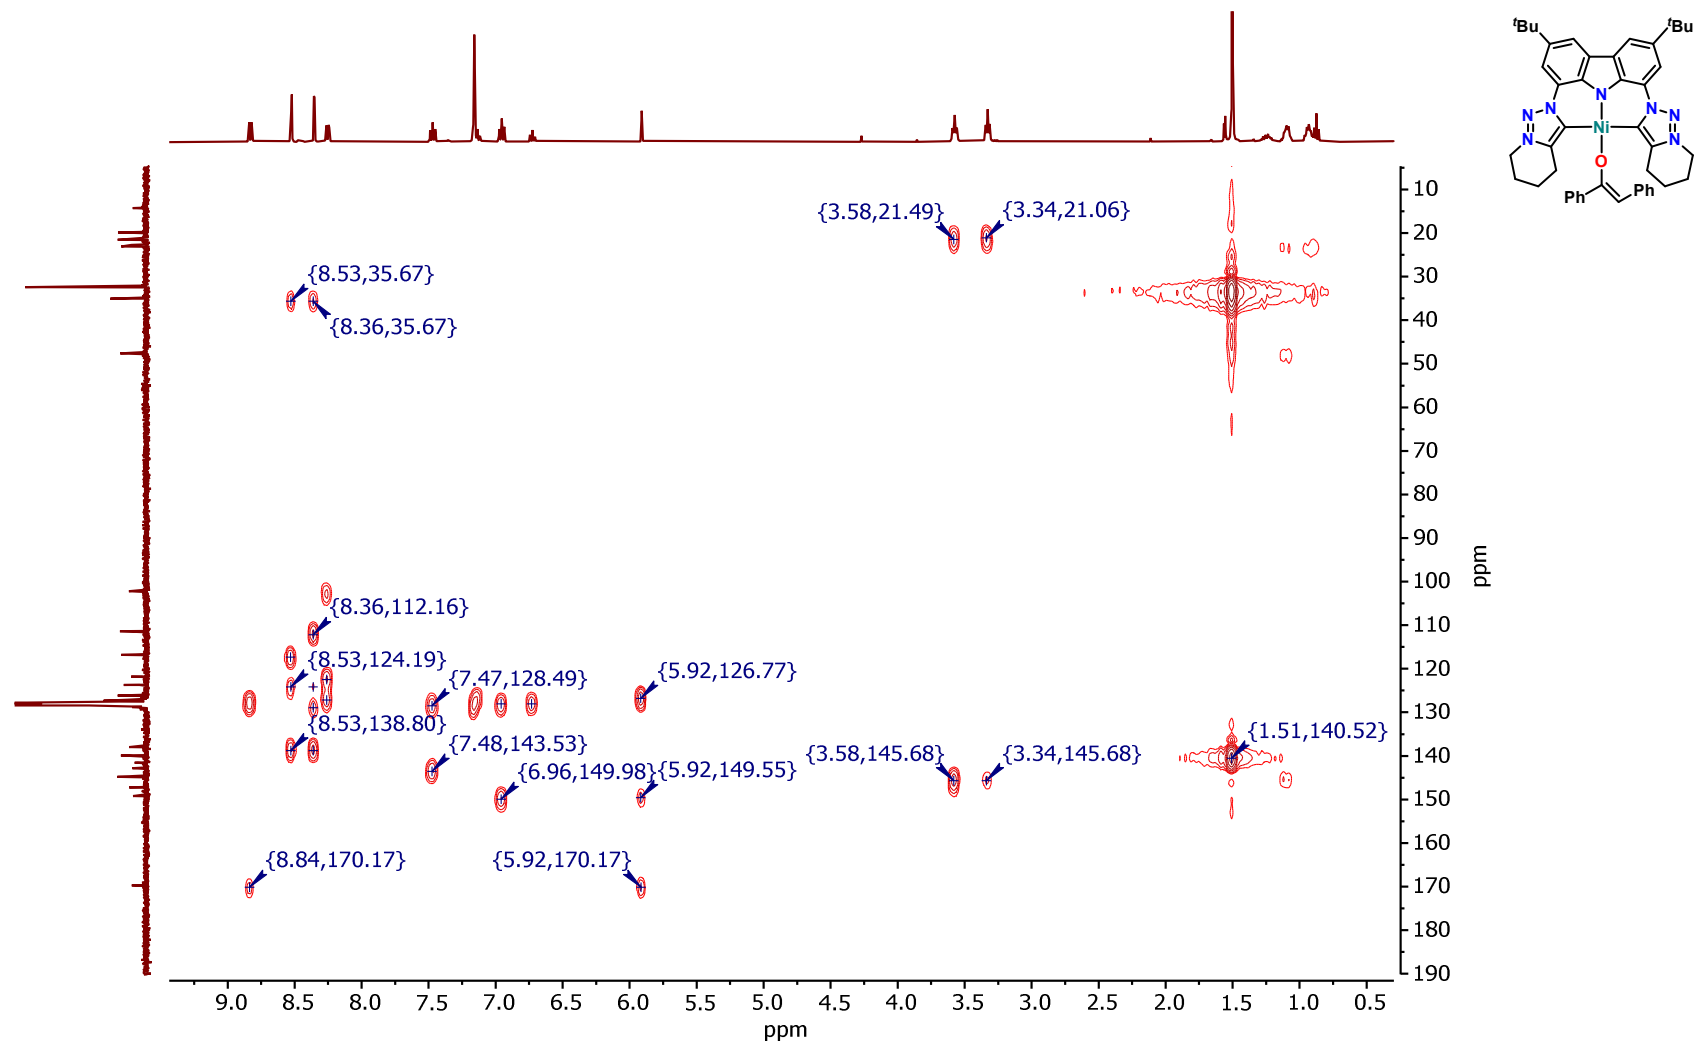

Figure S 70:  $^1\text{H} - ^{13}\text{C}$  HMBC of **12** in  $\text{C}_6\text{D}_6$  at 298K.

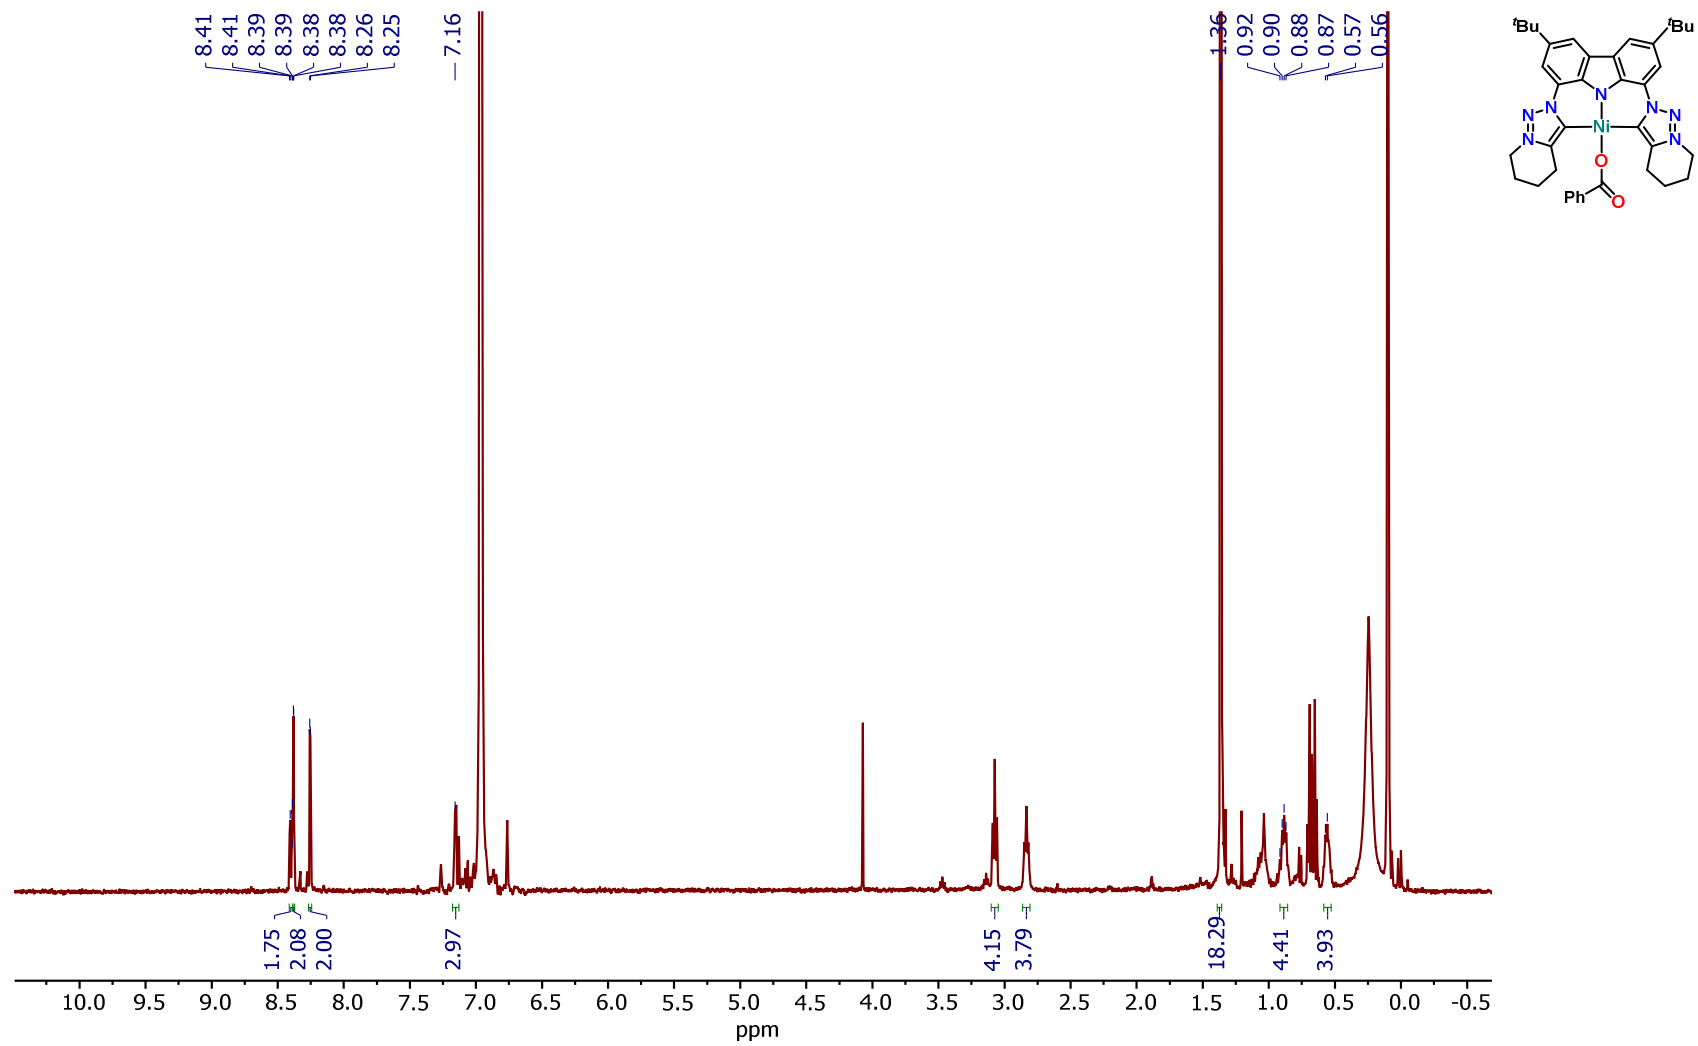

Figure S 71:  $^1\text{H}$  NMR of **12'** (crystals) in  $\text{C}_6\text{D}_6$  at 298K.



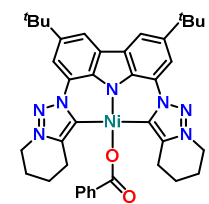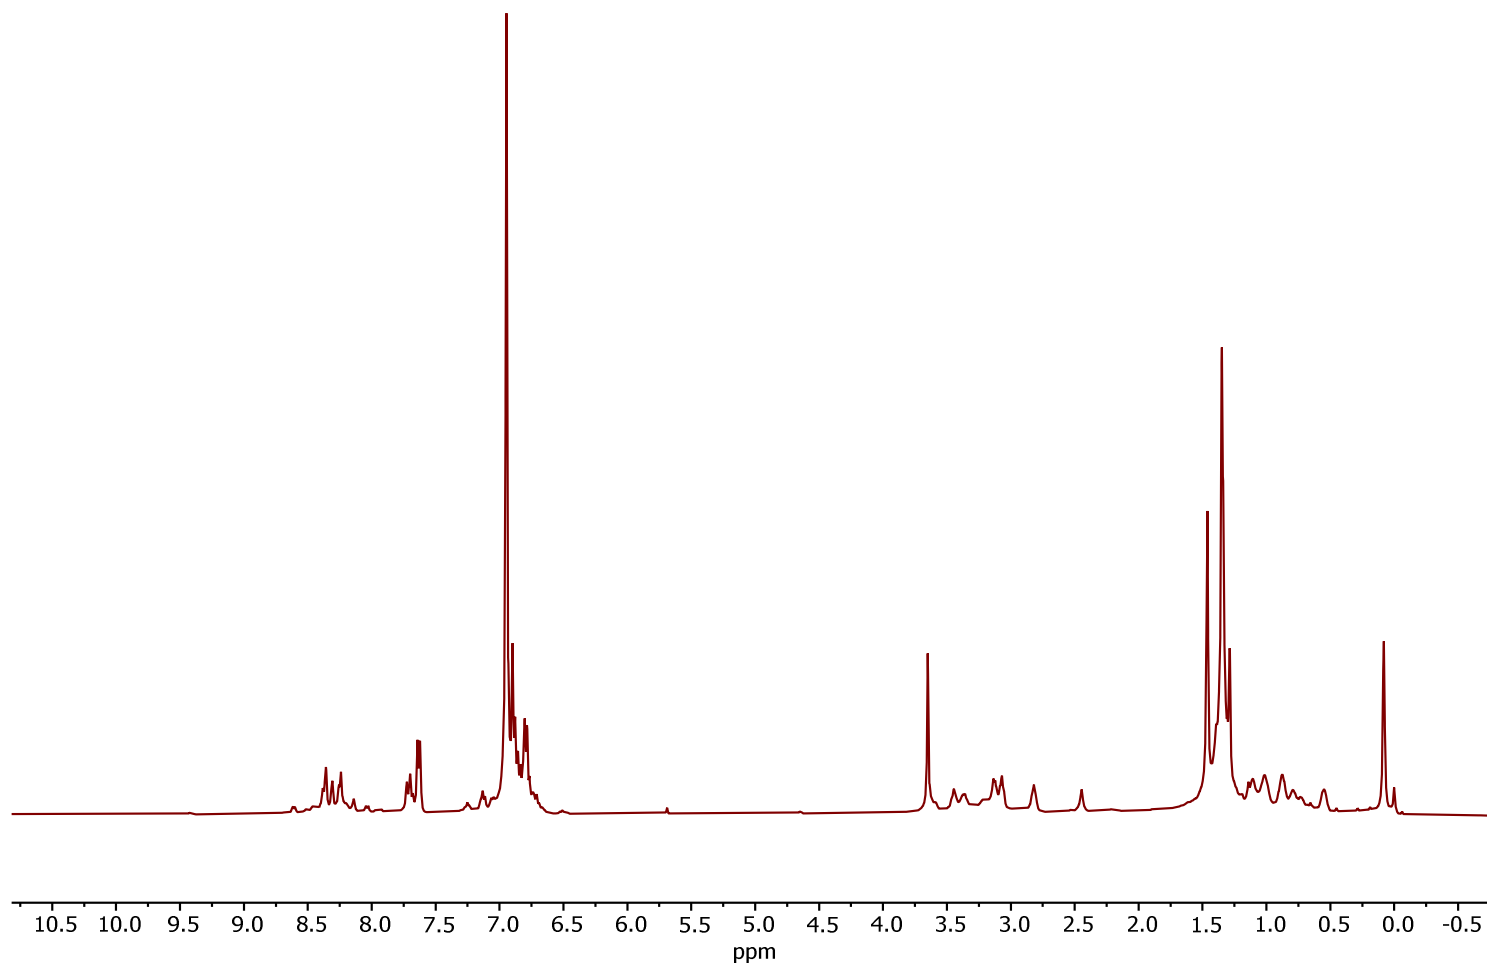

Figure S 72: <sup>1</sup>H NMR of **12'** (crude) in C<sub>6</sub>D<sub>6</sub> at 298K.

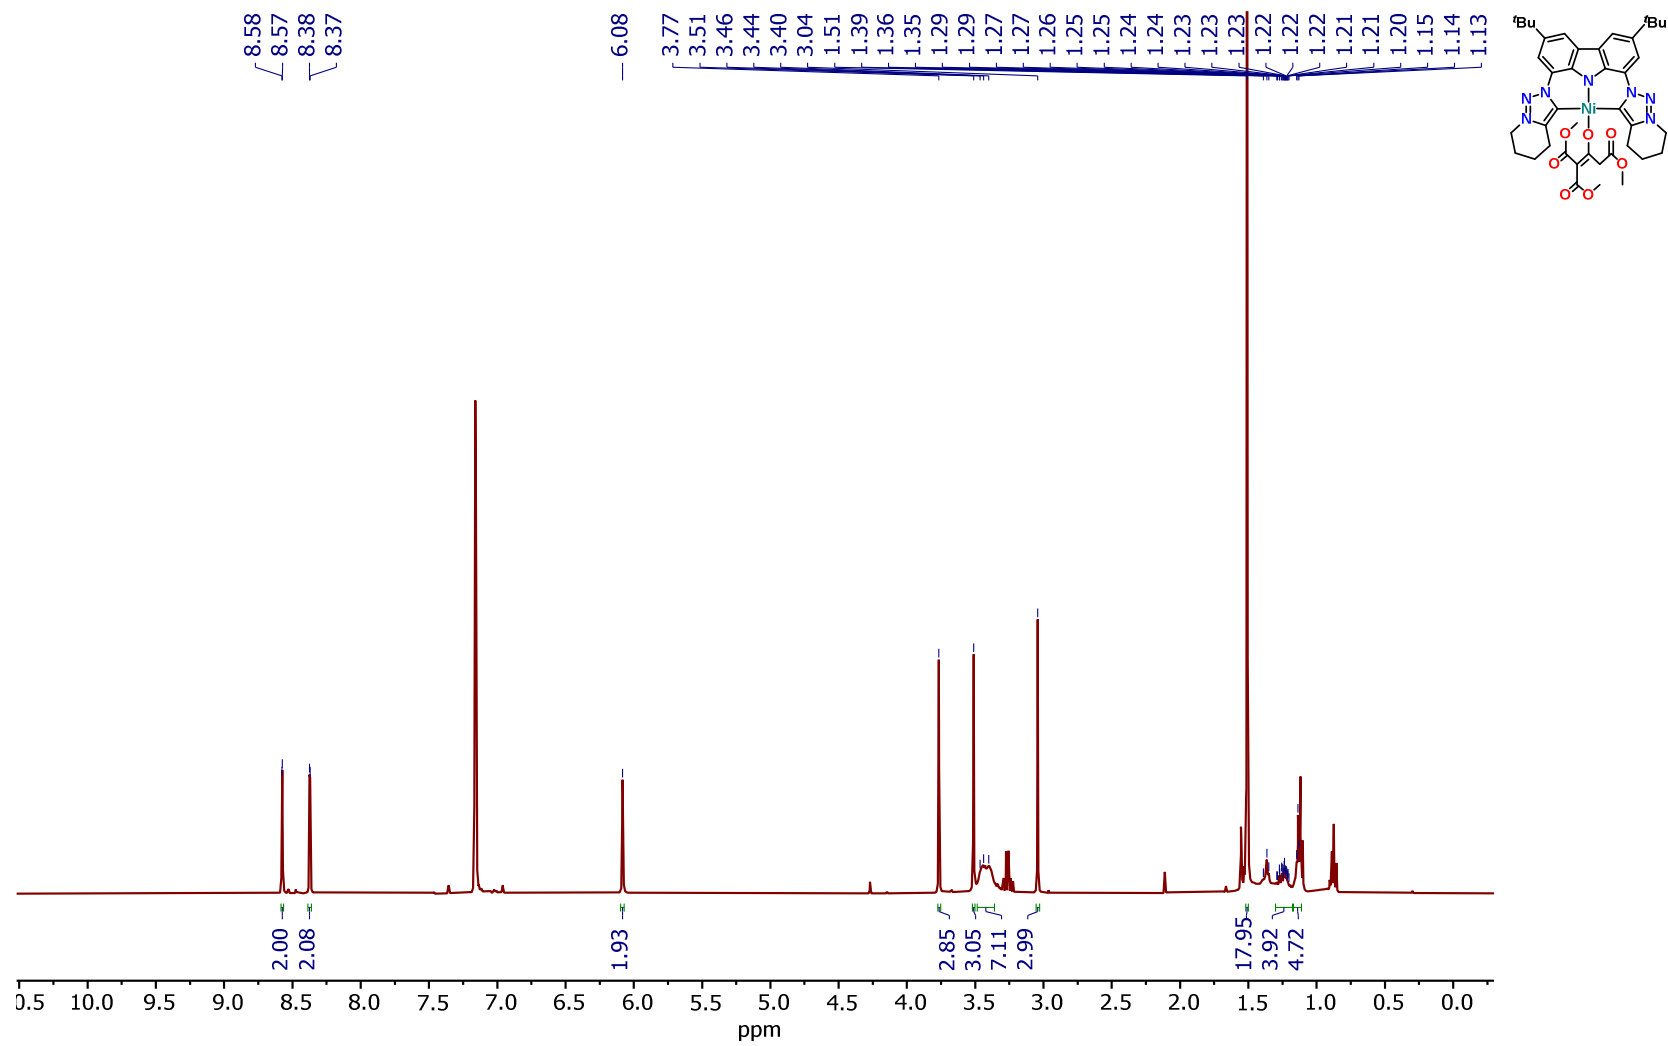

Figure S 73:  $^1\text{H}$  NMR of **13** in  $\text{C}_6\text{D}_6$  at 298K.

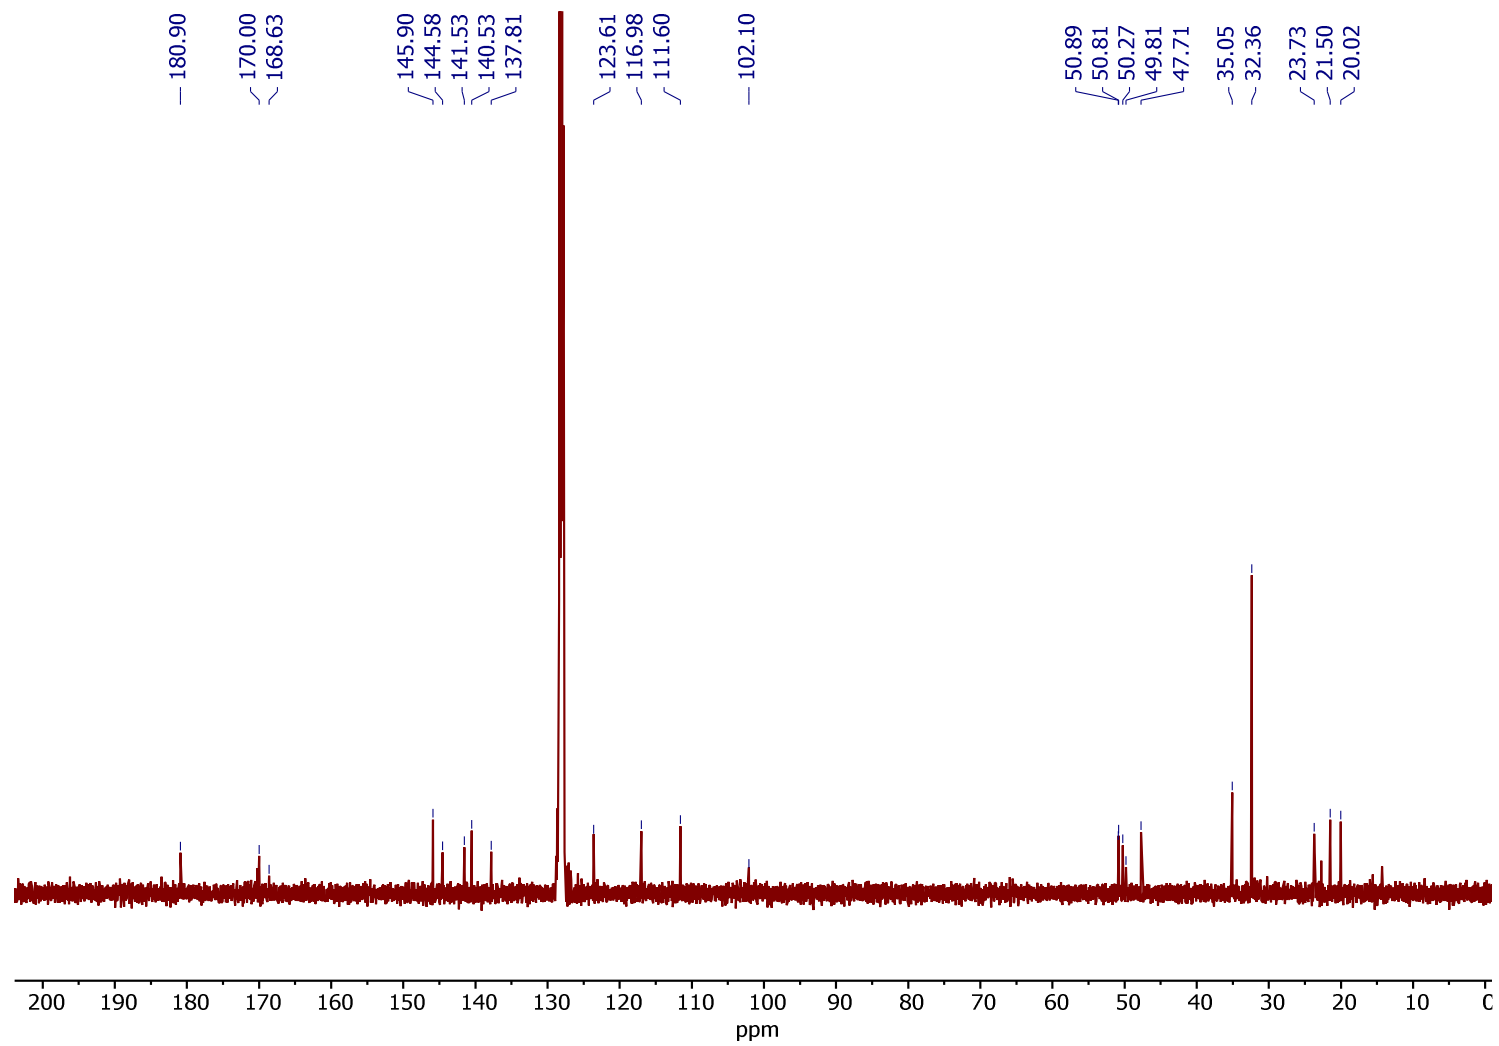

Figure S 74: <sup>13</sup>C NMR of **13** in C<sub>6</sub>D<sub>6</sub> at 298K.

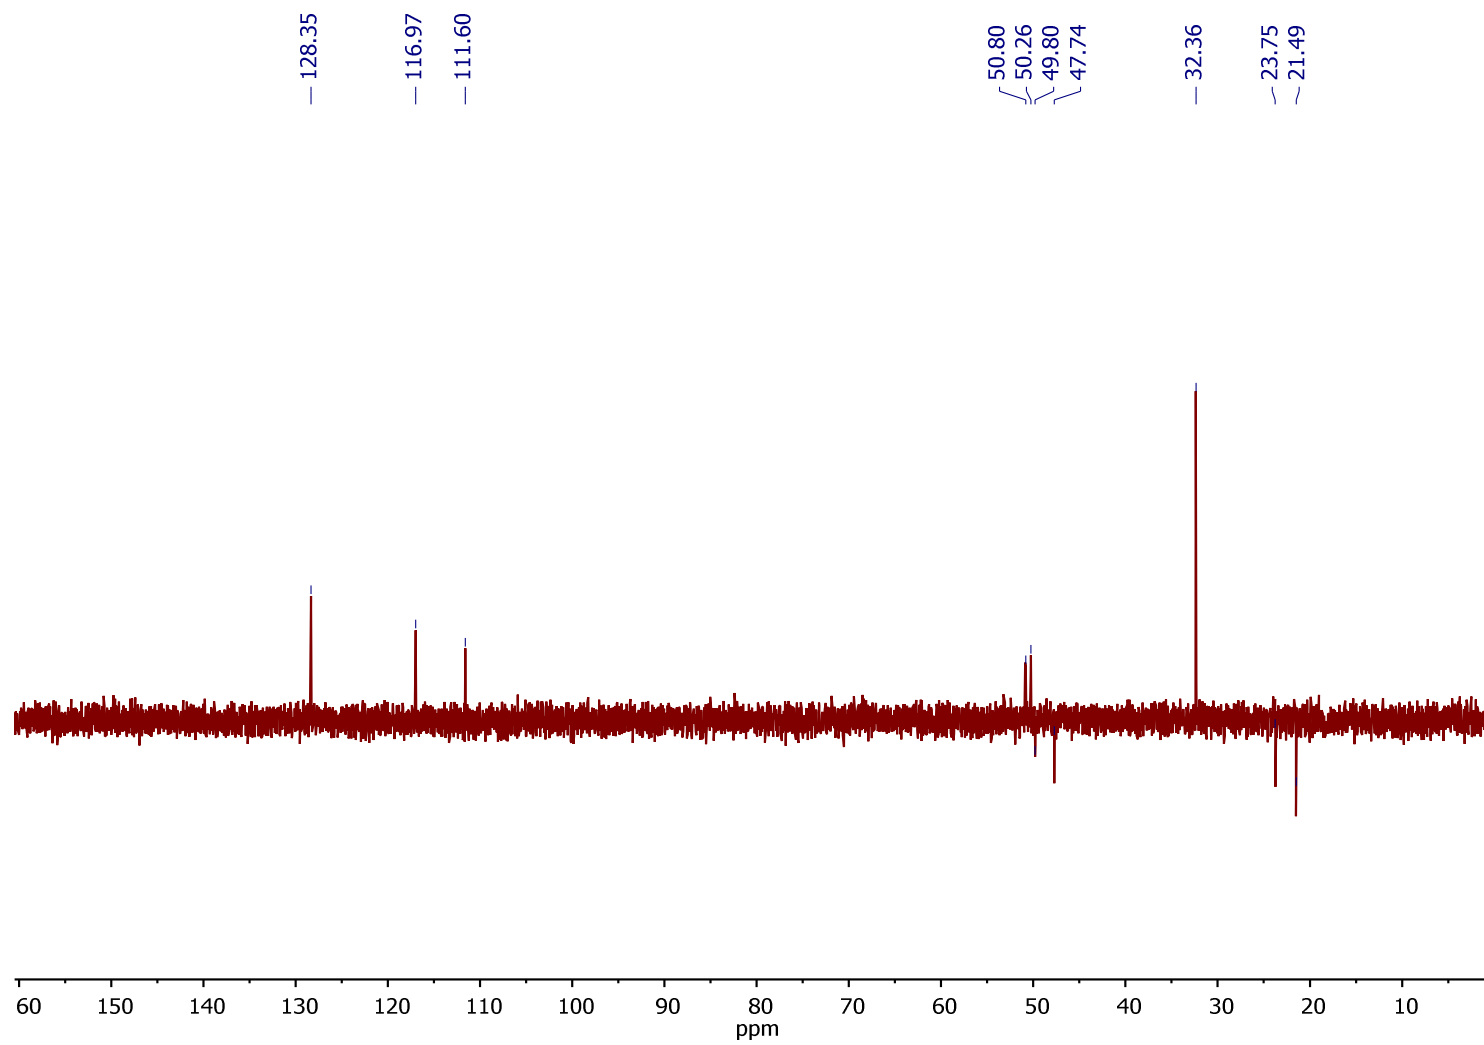

Figure S 75: 135-DEPT  $^{13}\text{C}$  NMR of **13** in  $\text{C}_6\text{D}_6$  at 298K.

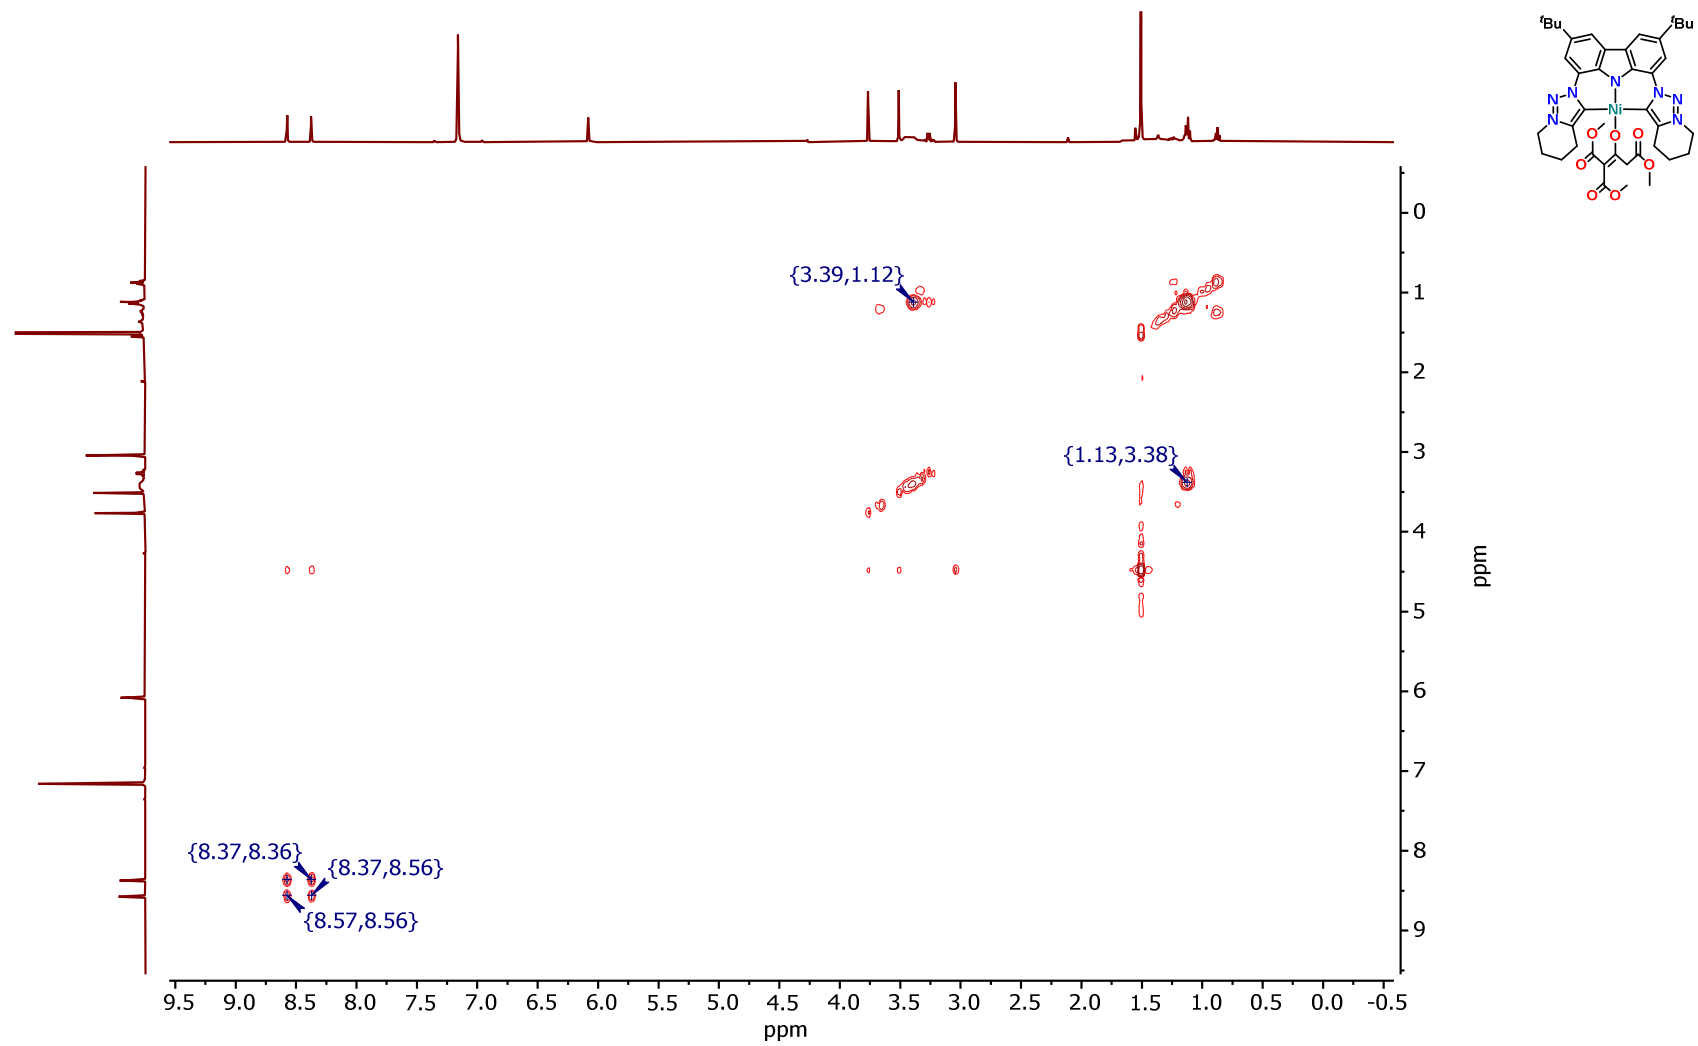

Figure S 76:  $^1\text{H} - ^1\text{H}$  COSY of **13** in  $\text{C}_6\text{D}_6$  at 298K.

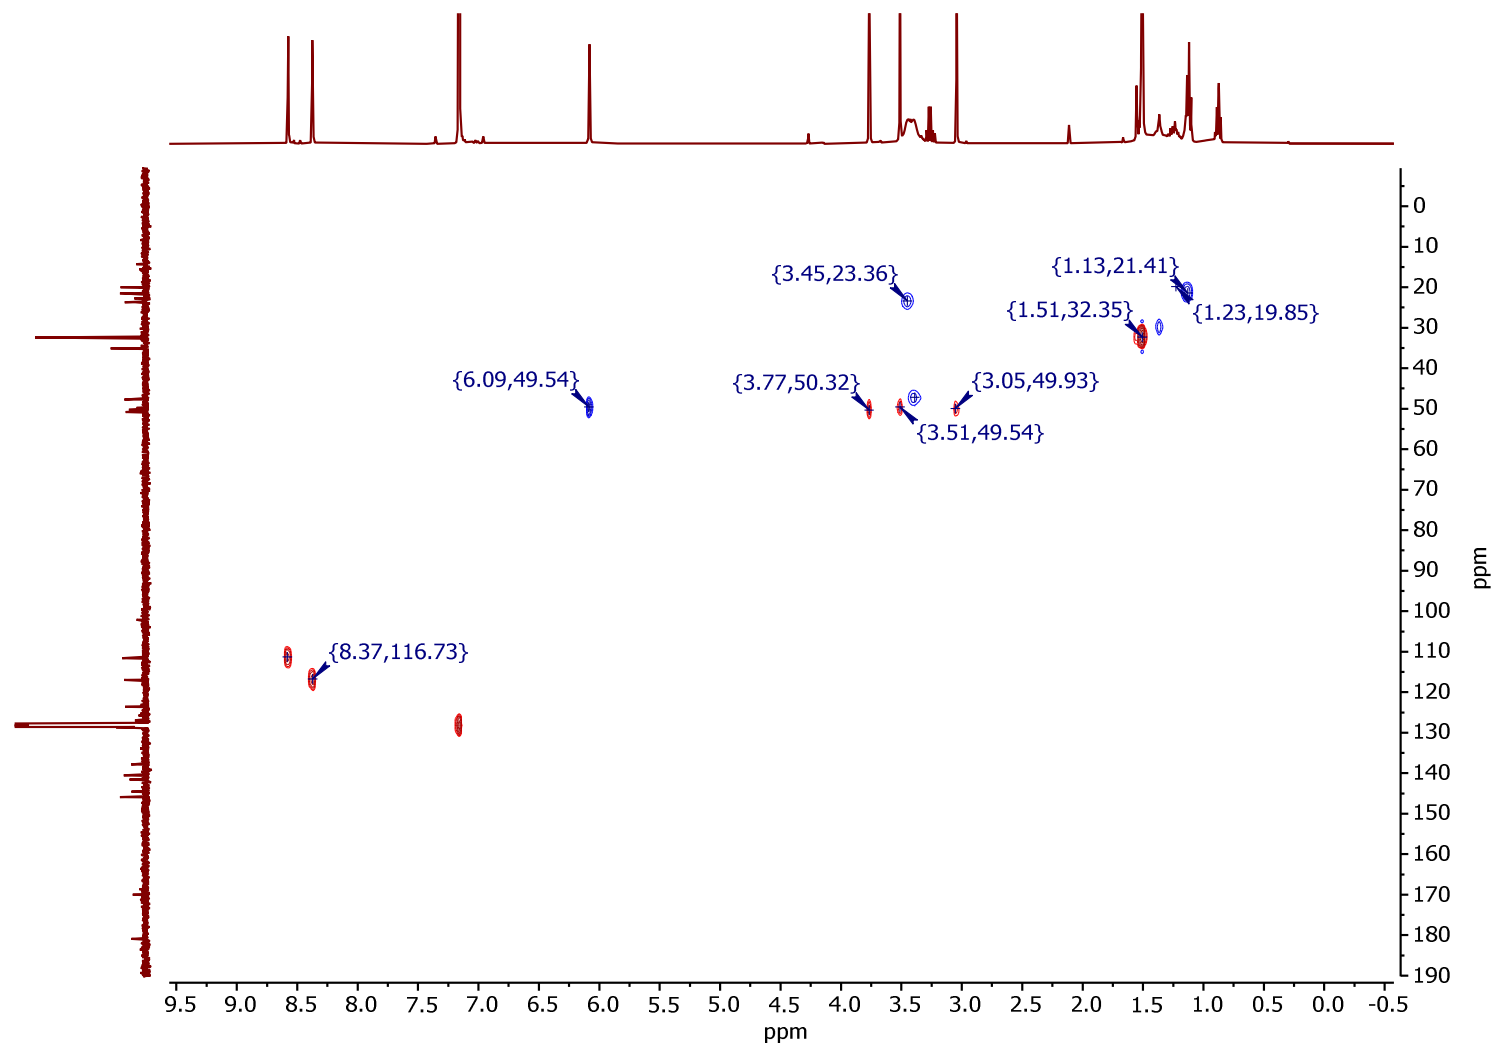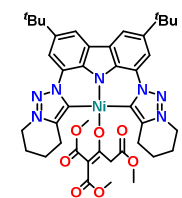

Figure S 77:  $^1\text{H} - ^{13}\text{C}$  HSQC of **13** in  $\text{C}_6\text{D}_6$  at 298K.

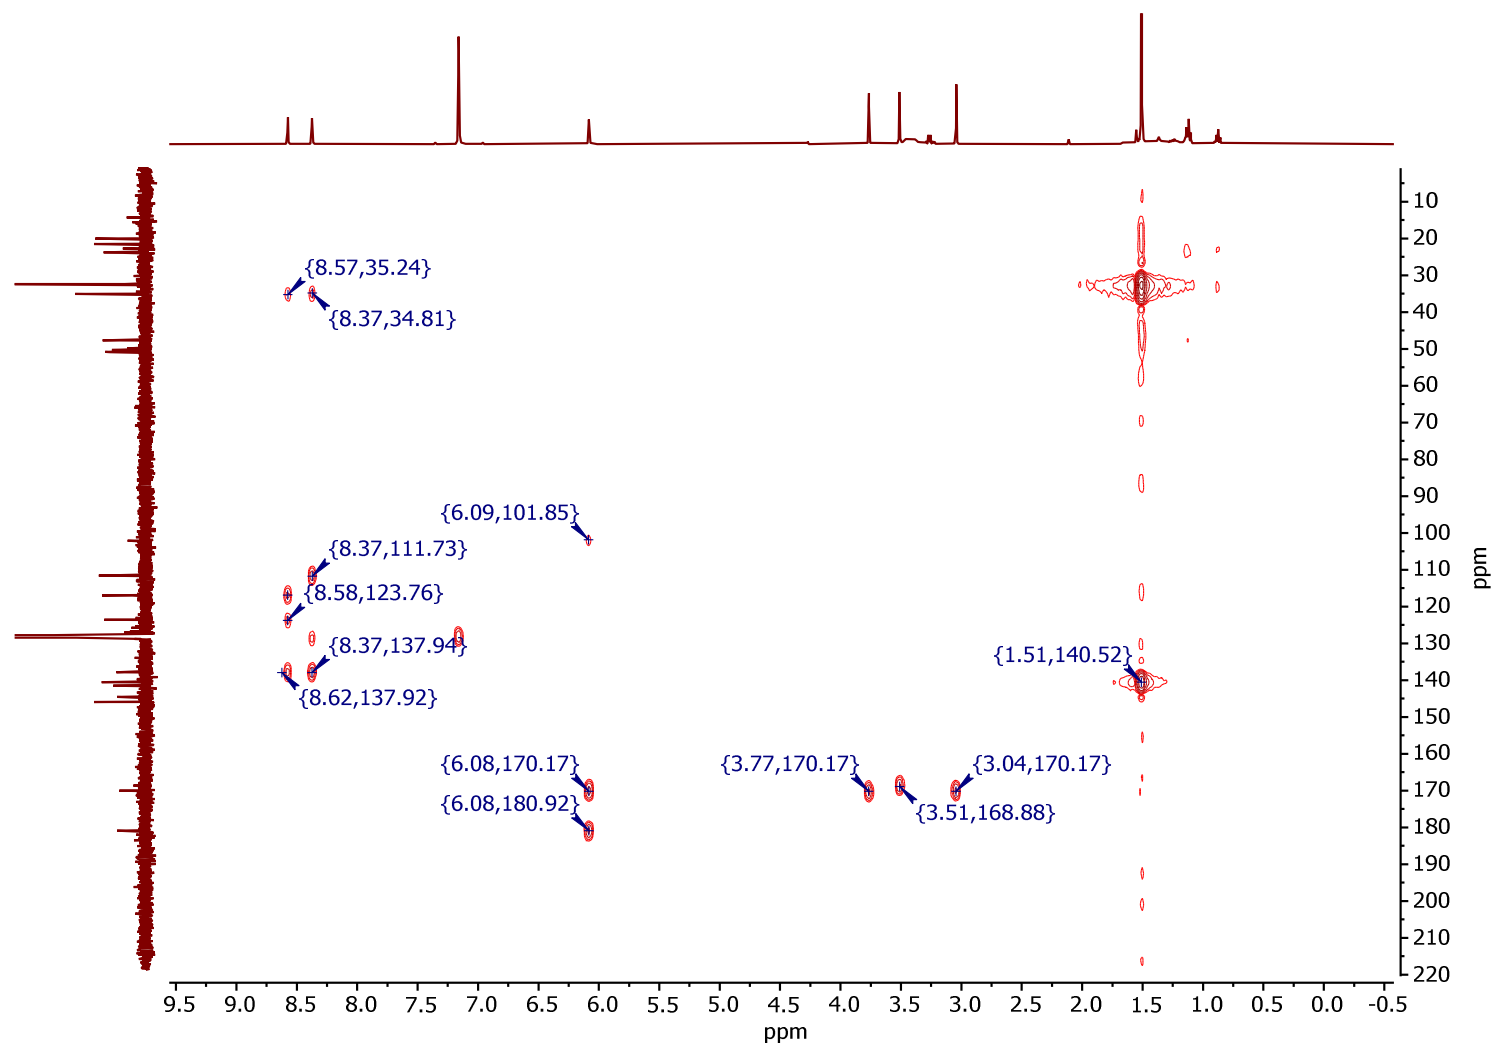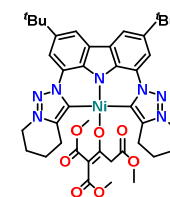

Figure S 78:  $^1\text{H} - ^{13}\text{C}$  HMBC of **13** in  $\text{C}_6\text{D}_6$  at 298K.

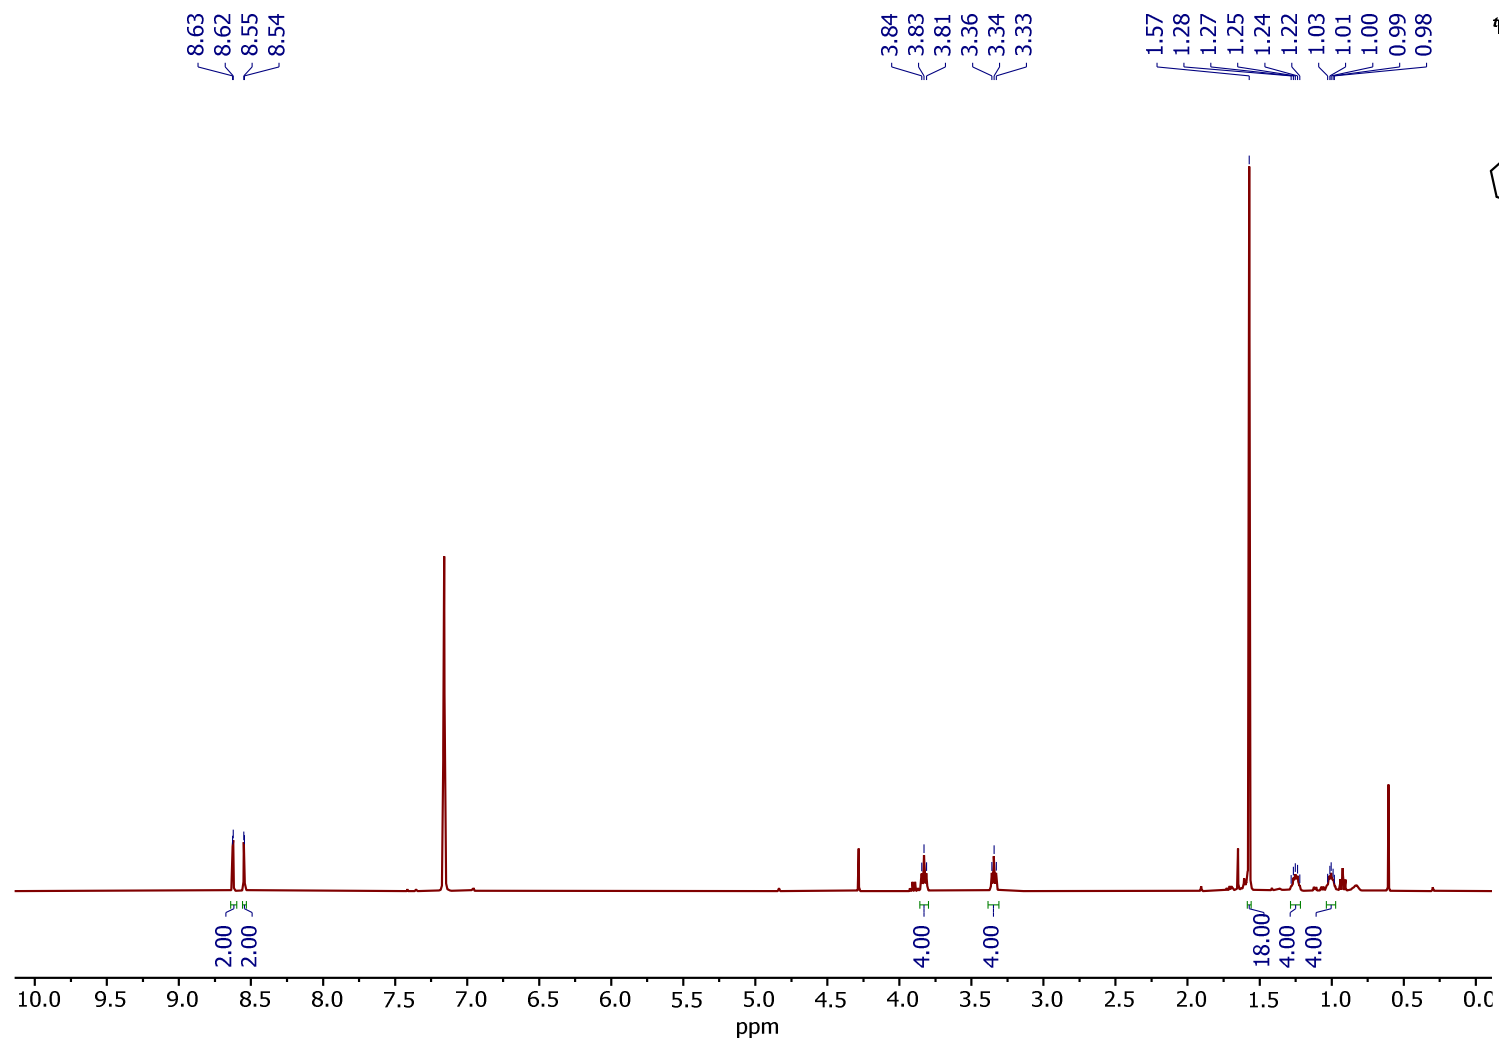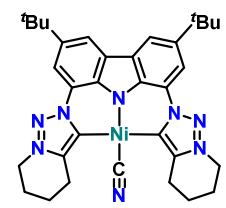

Figure S 79:  $^1\text{H}$  NMR of **14** in  $\text{C}_6\text{D}_6$  at 298K.



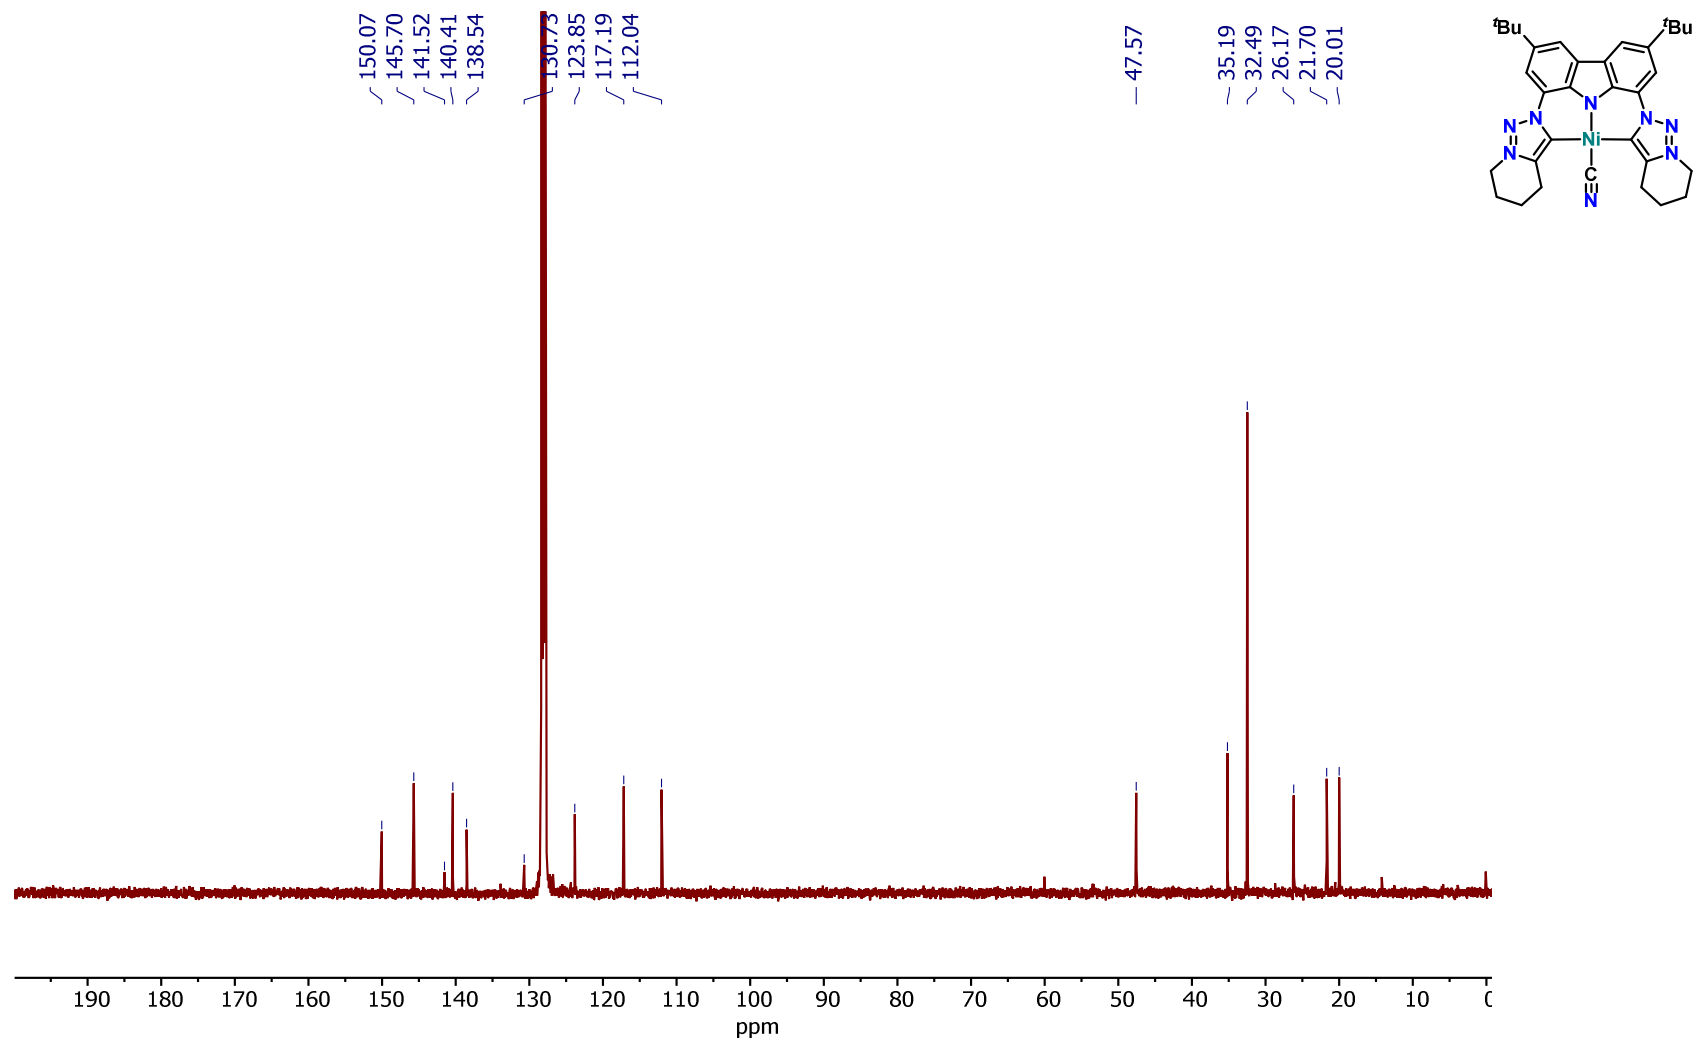

Figure S 80:  $^{13}\text{C}$  NMR of **14** in  $\text{C}_6\text{D}_6$  at 298K.

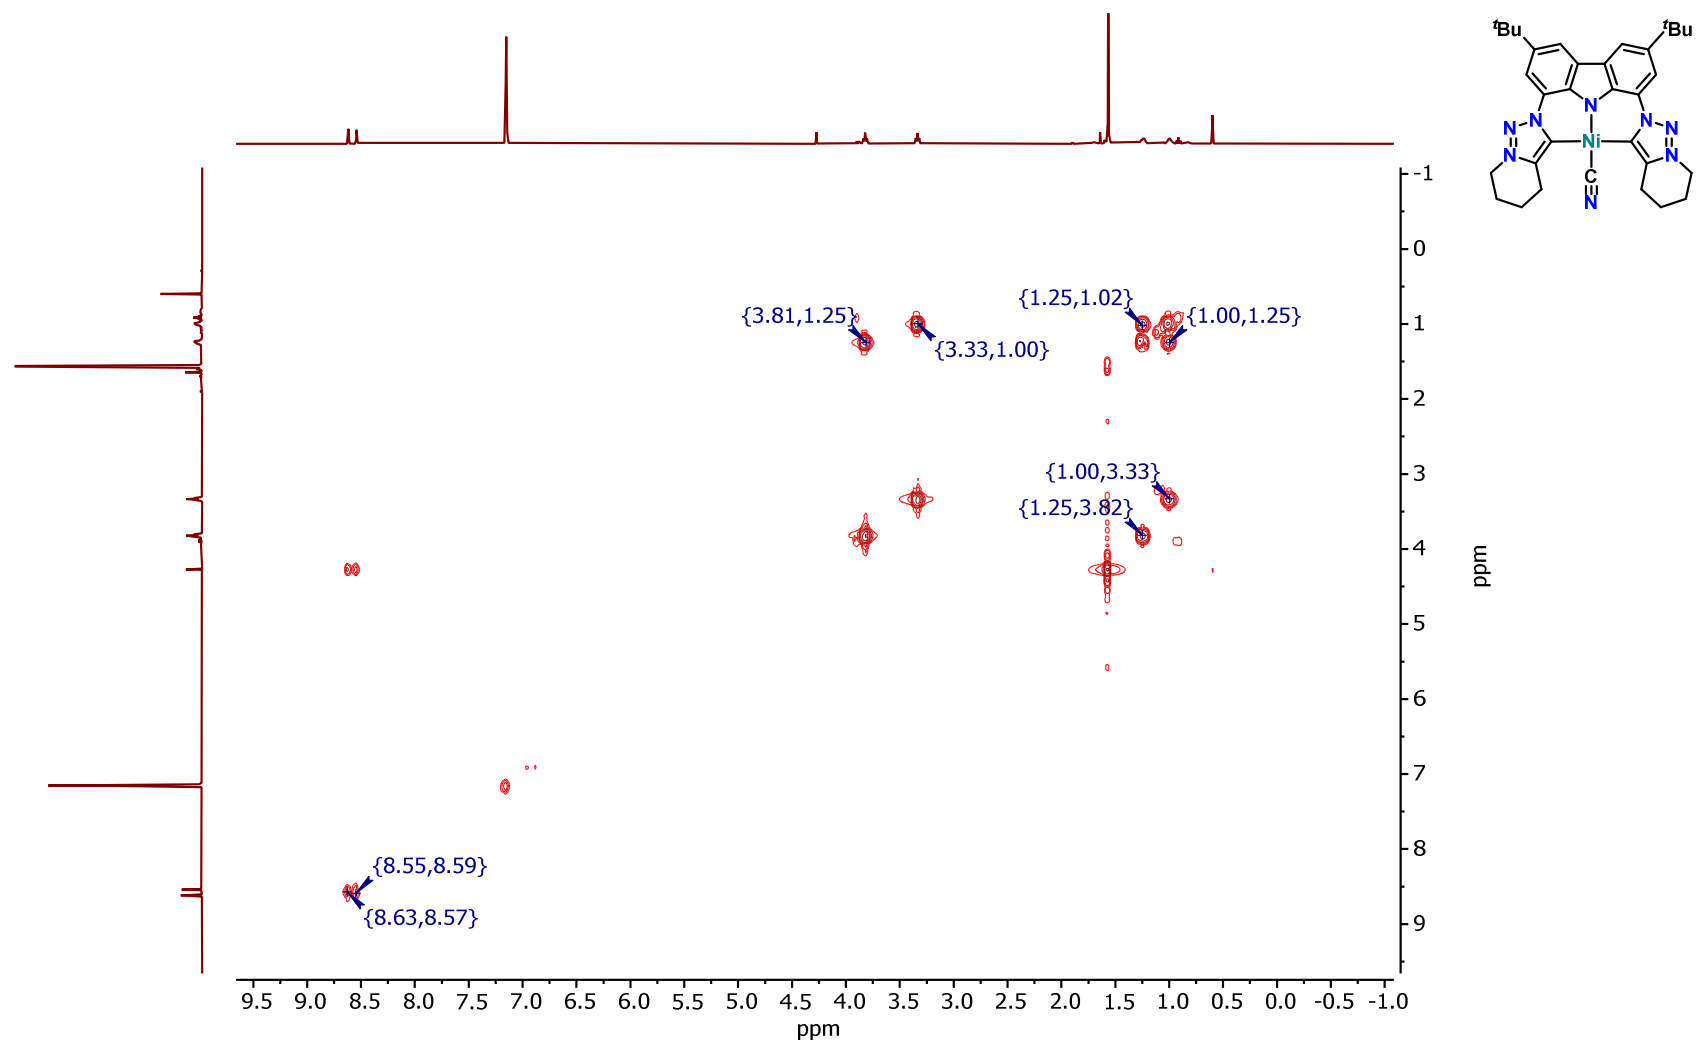

Figure S 81:  $^1\text{H} - ^1\text{H}$  COSY of **14** in  $\text{C}_6\text{D}_6$  at 298K.

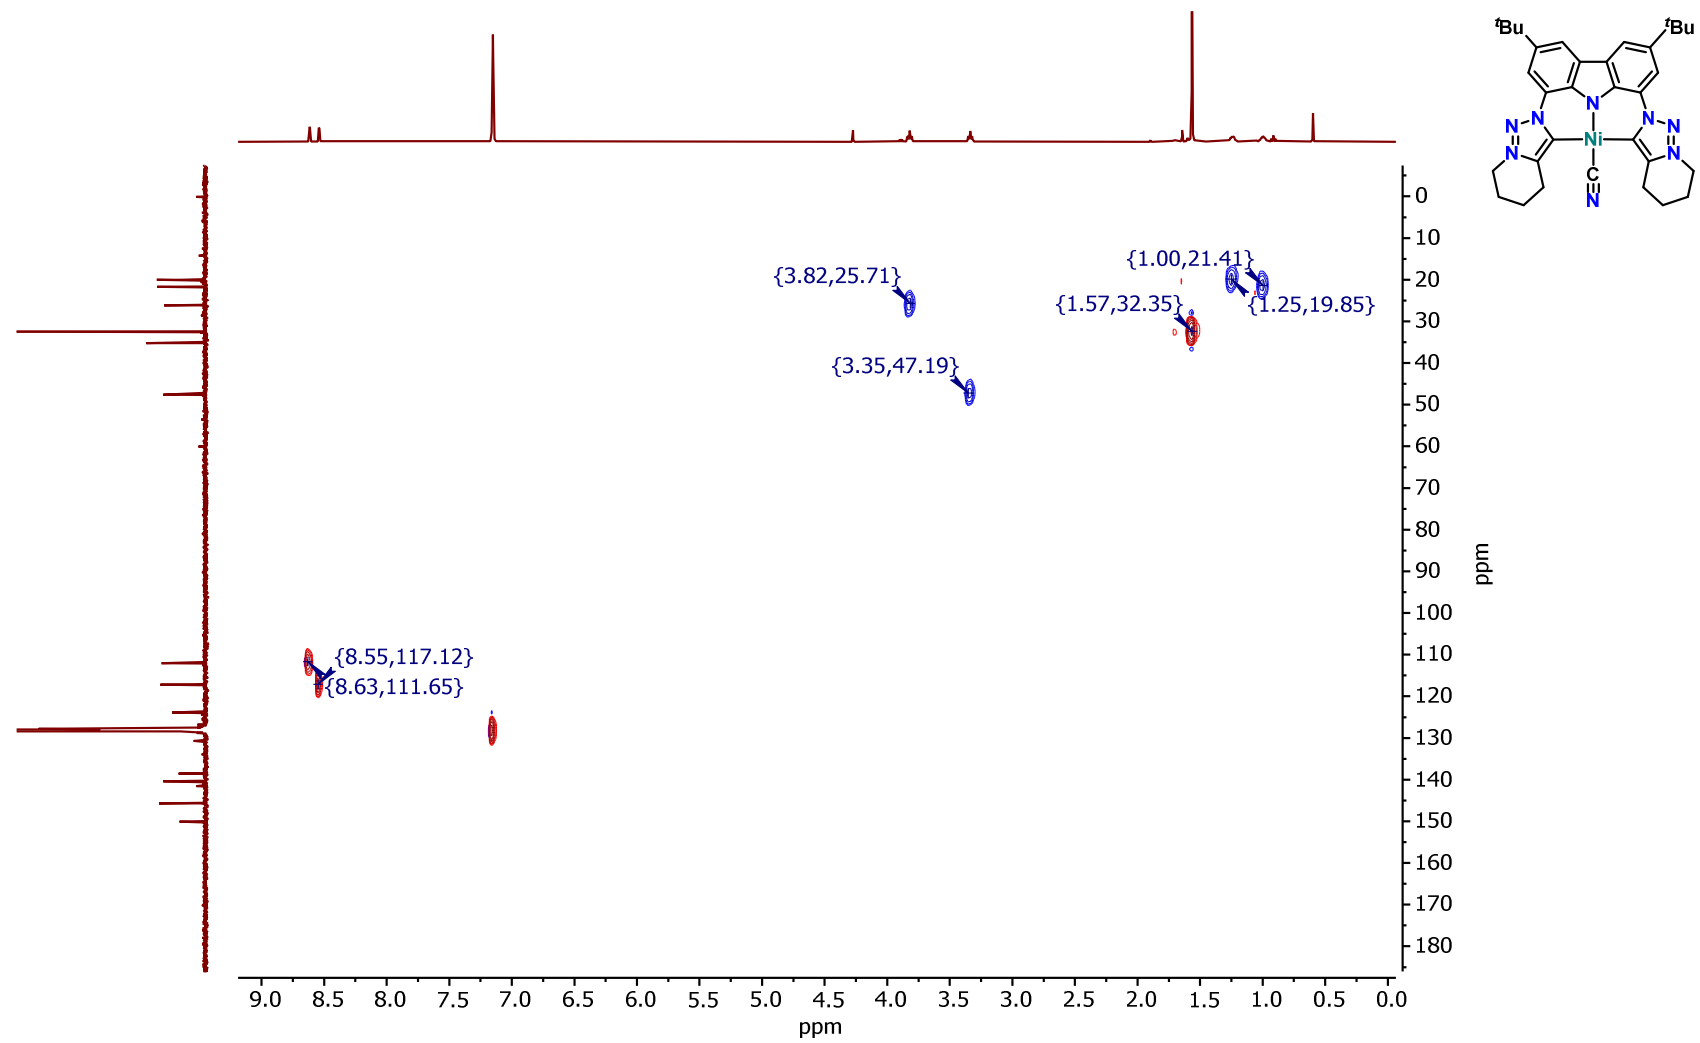

Figure S 82:  $^1\text{H}$  -  $^{13}\text{C}$  HSQC of **14** in  $\text{C}_6\text{D}_6$  at 298K.

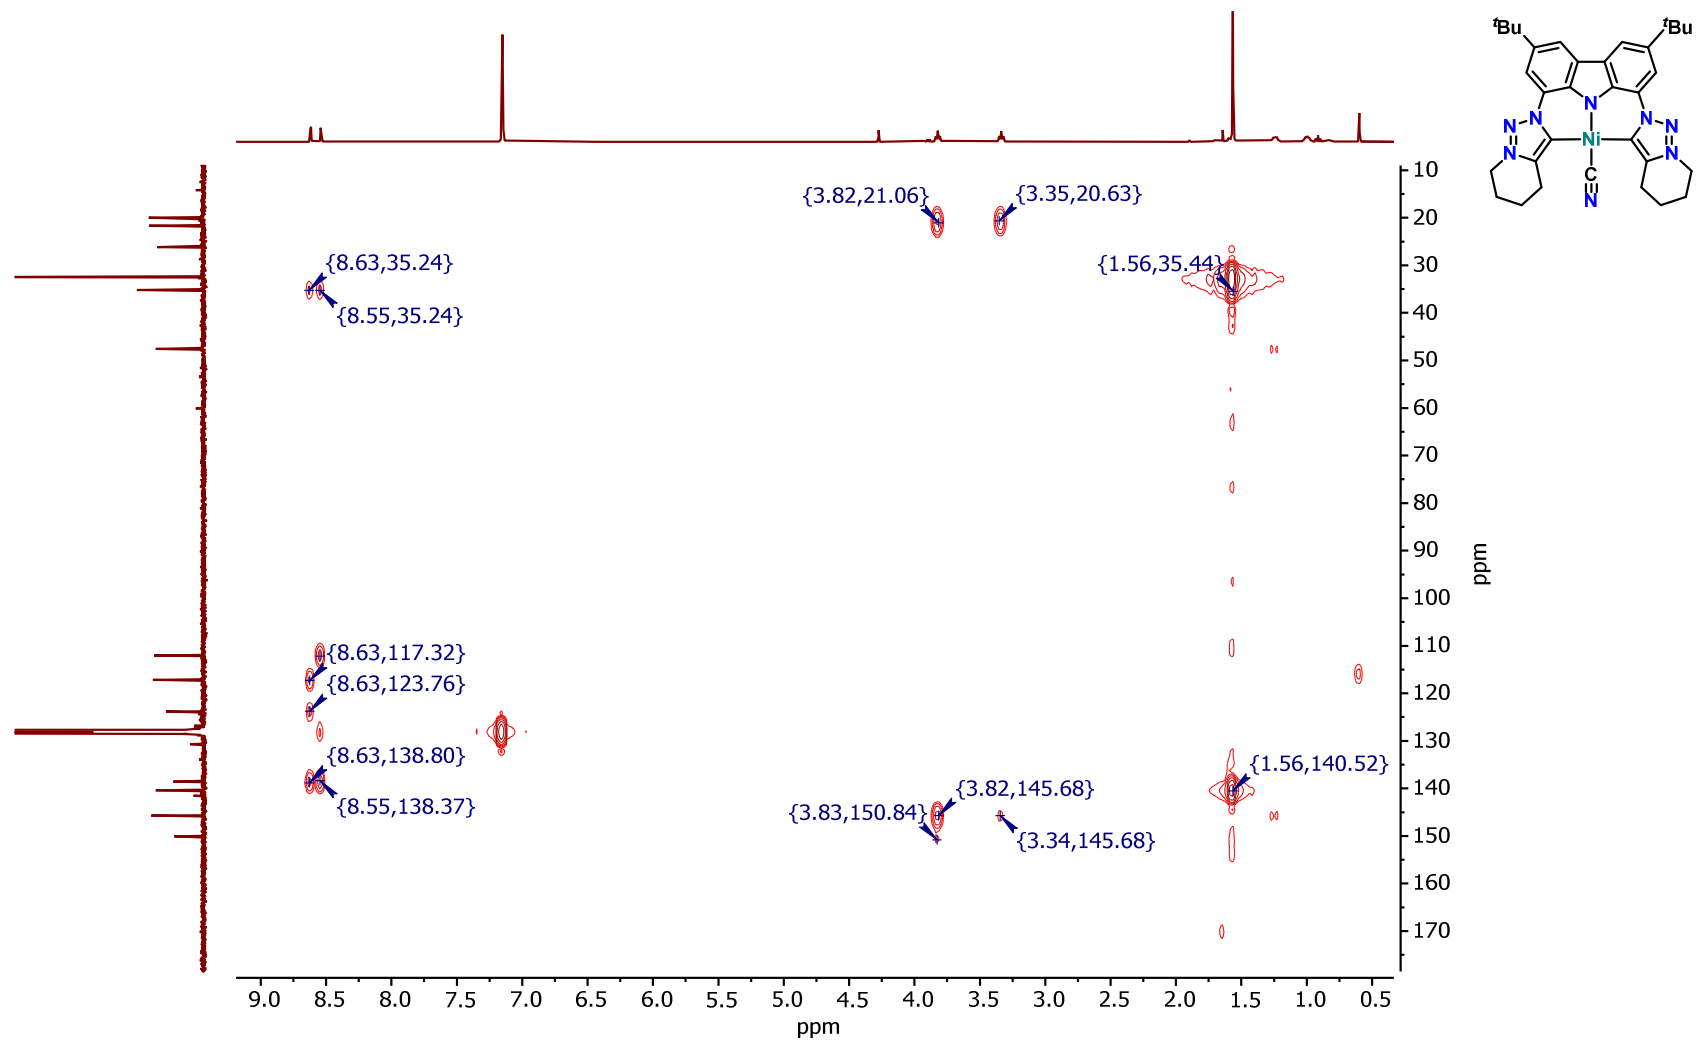

Figure S 83:  $^1\text{H}$  -  $^{13}\text{C}$  HMBC of **14** in  $\text{C}_6\text{D}_6$  at 298K.

## 2. IR spectra

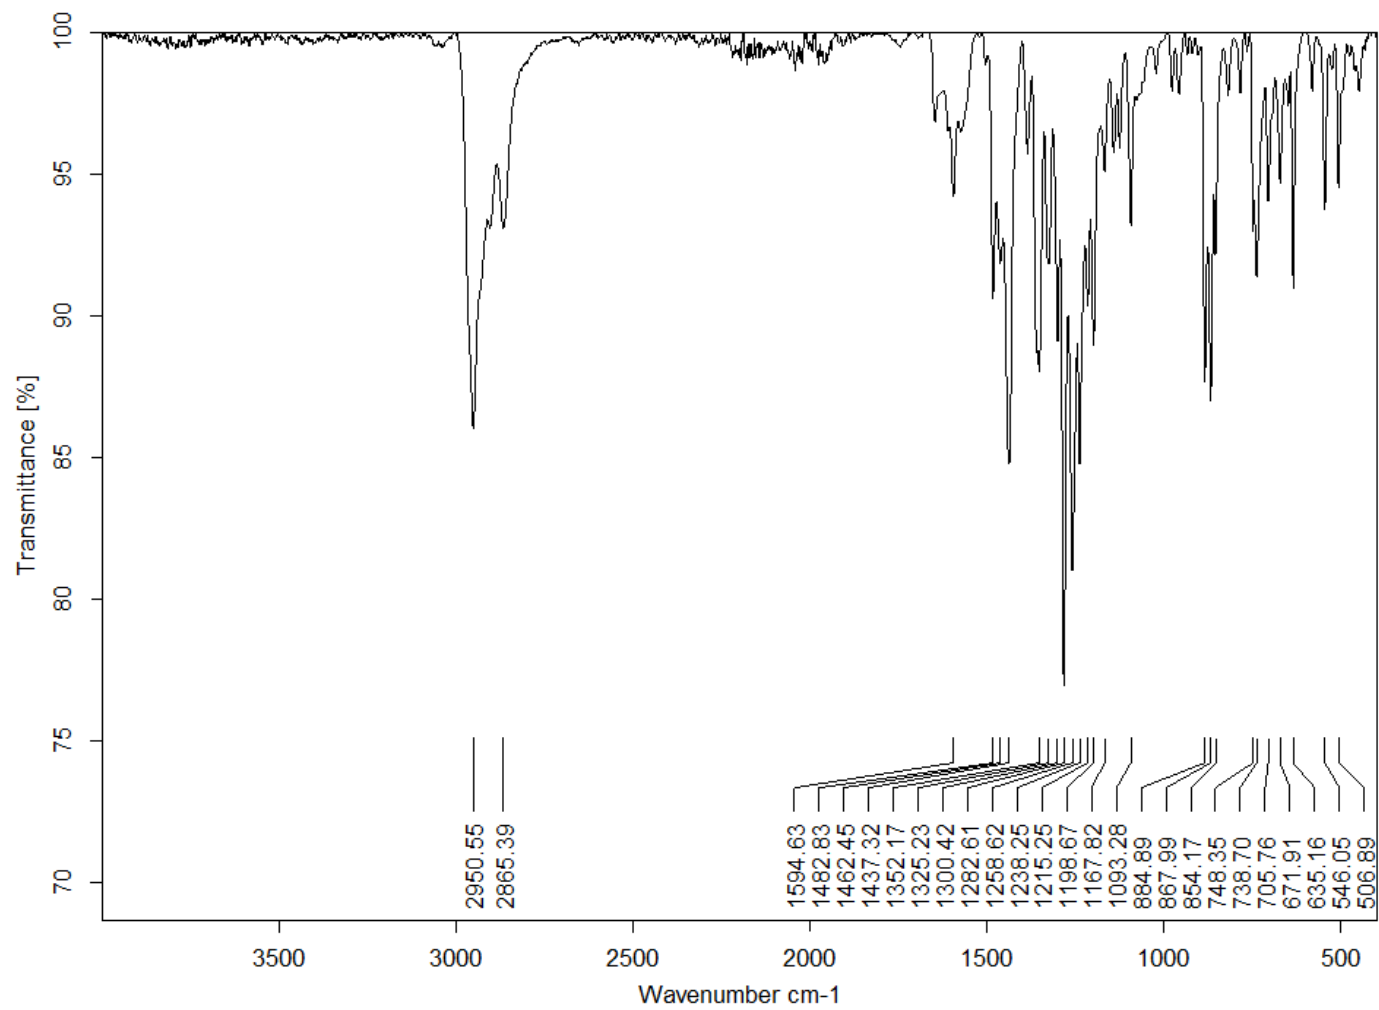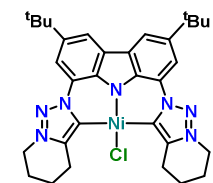

Figure S 84: IR spectrum of 1 at 298K.

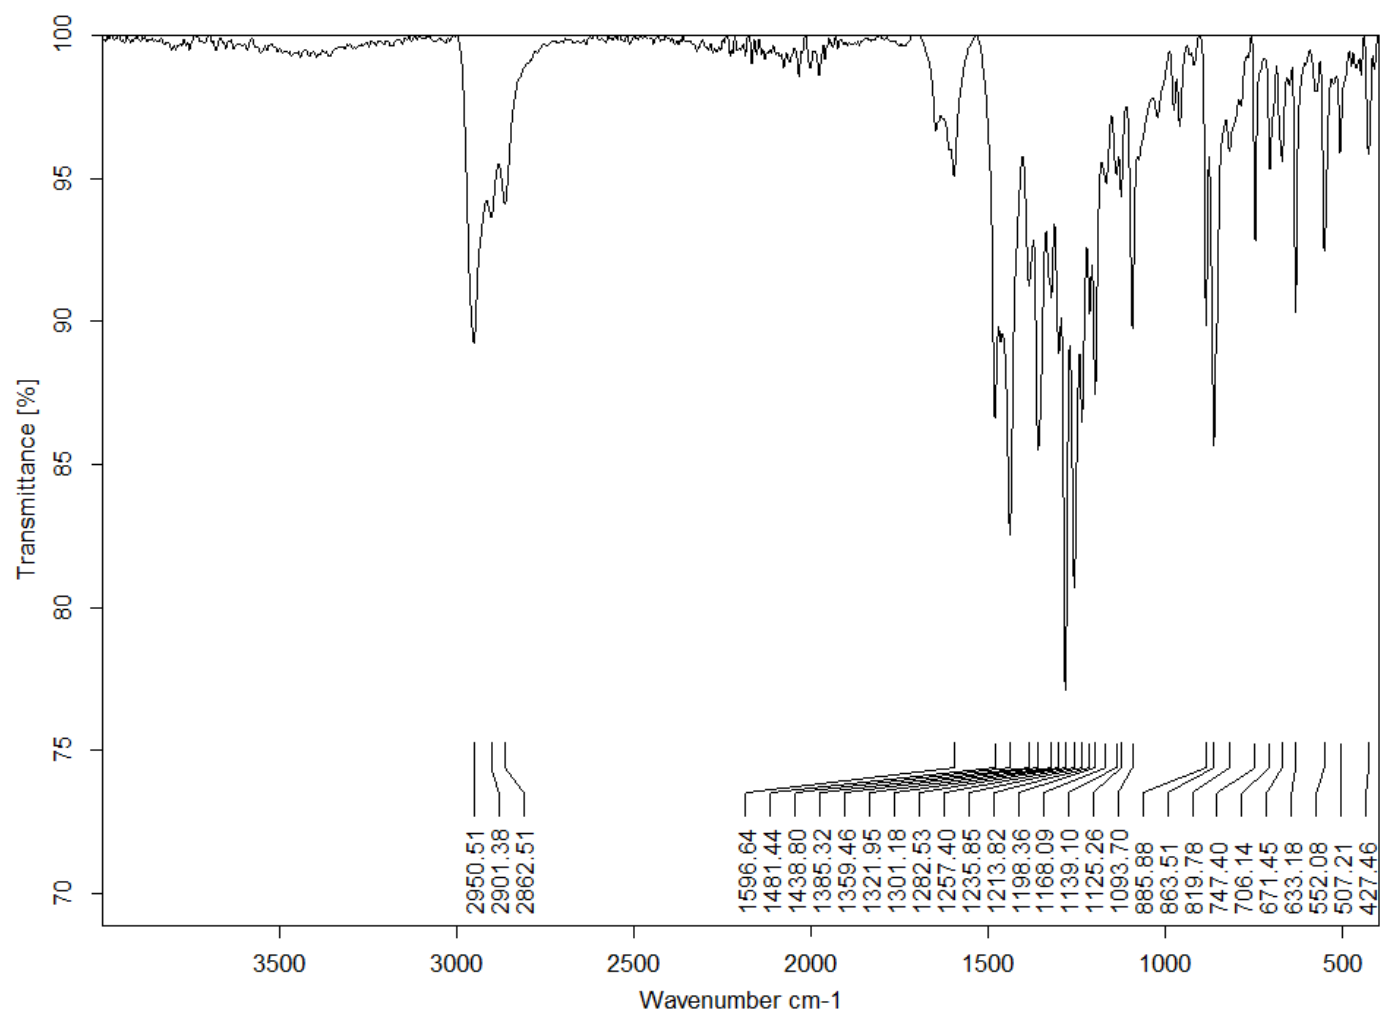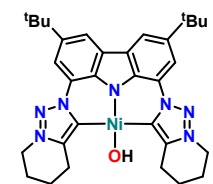

Figure S 85: IR spectrum of **2** at 298K.

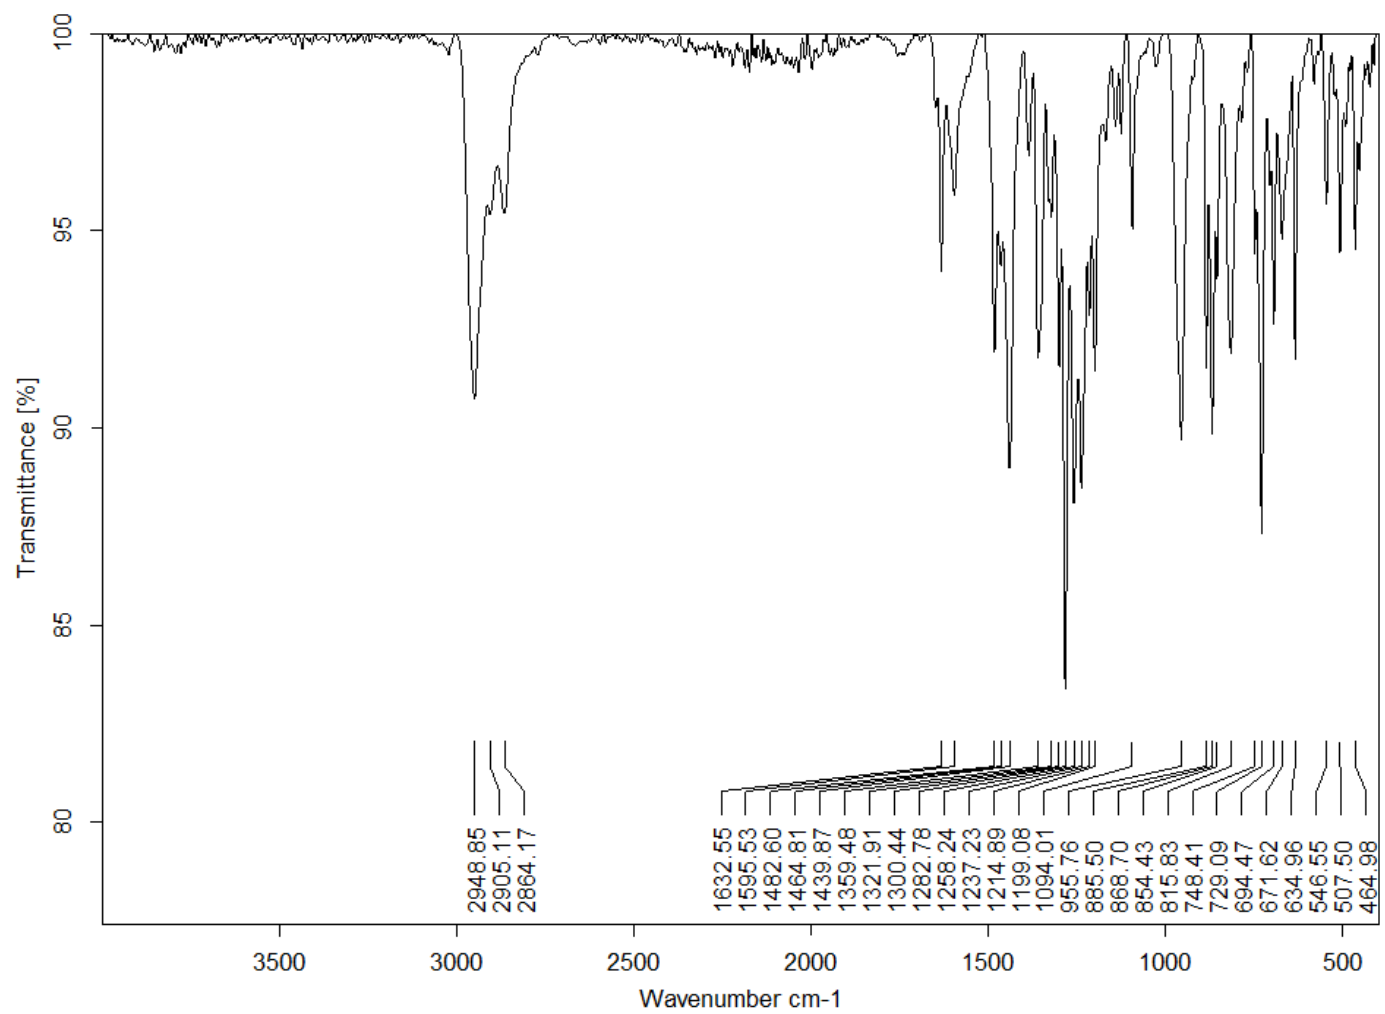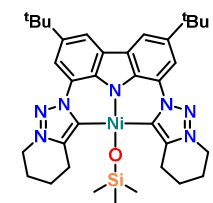

Figure S 86: IR spectrum of **3** at 298K.

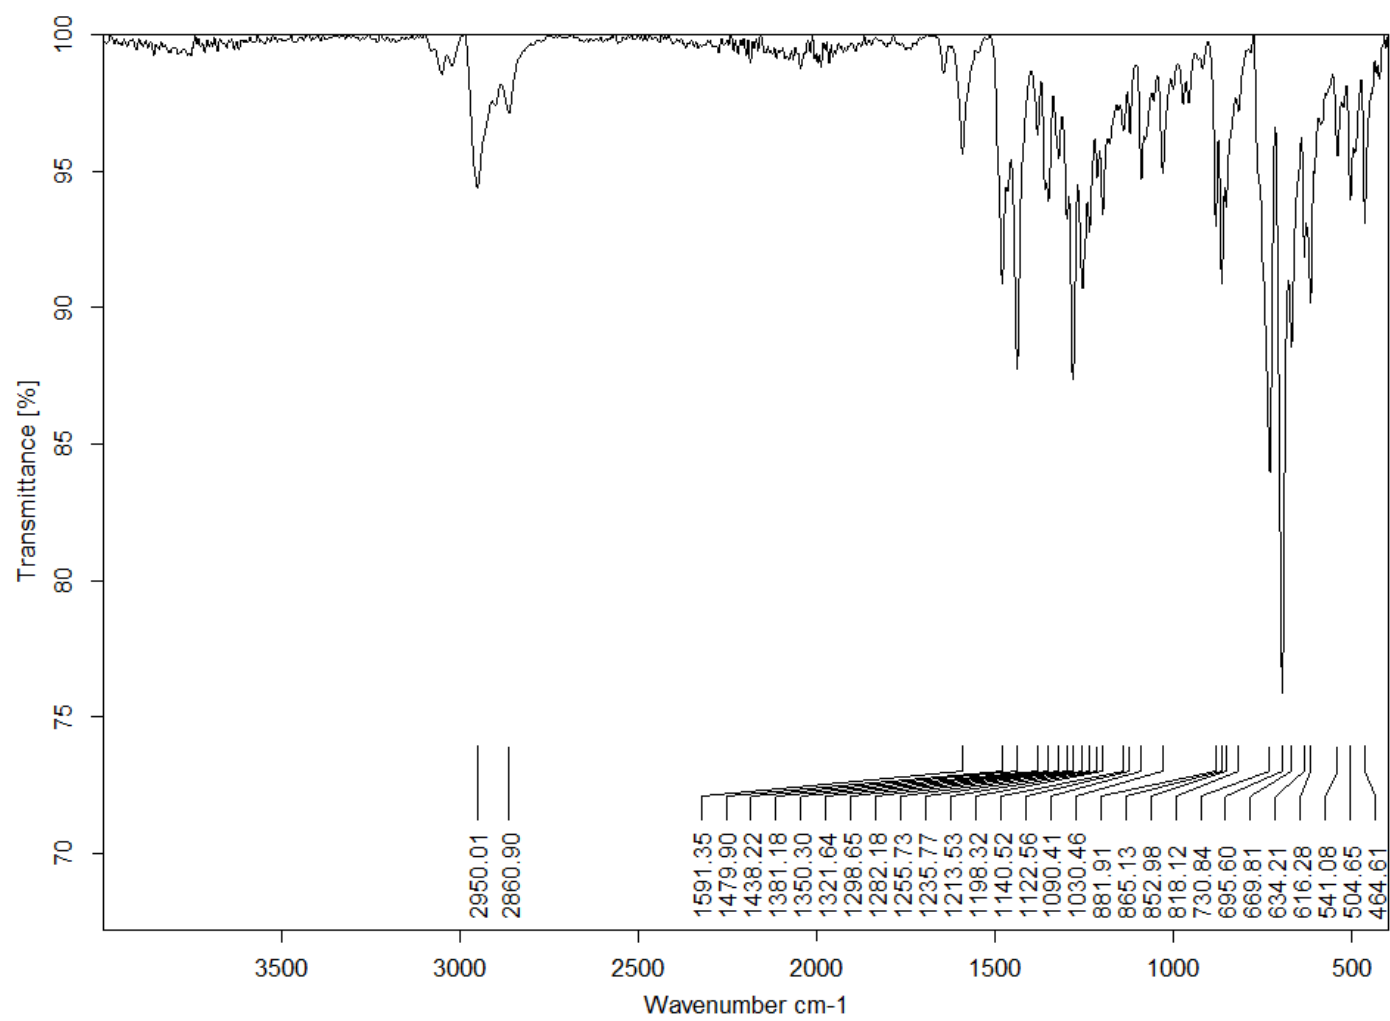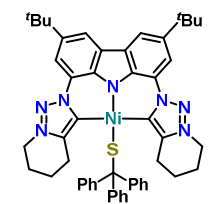

Figure S 87: IR spectrum of 4 at 298K.



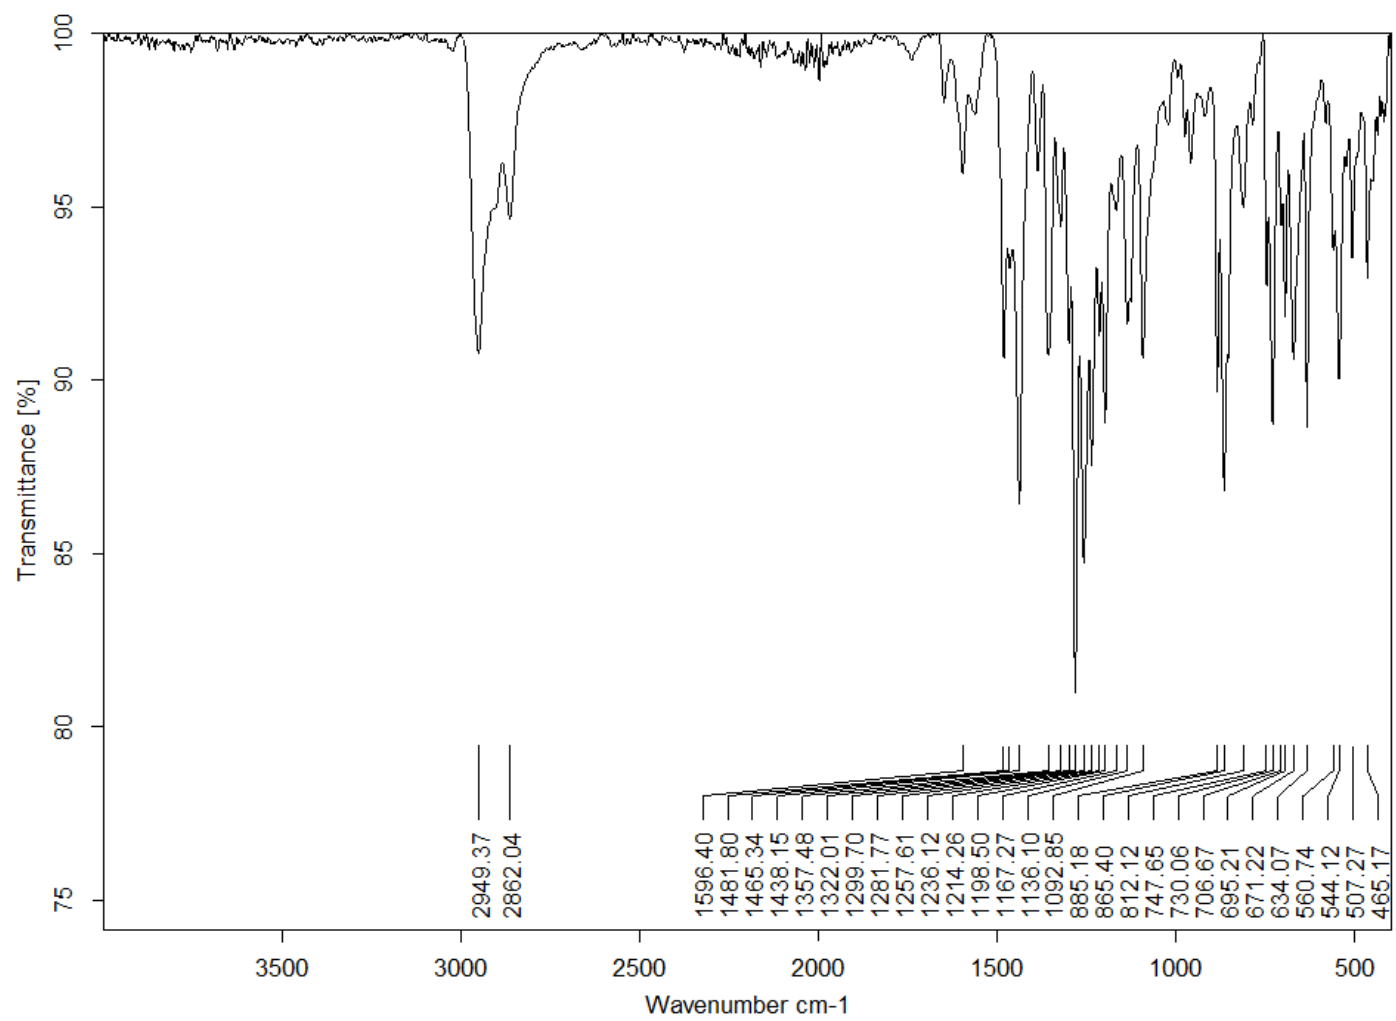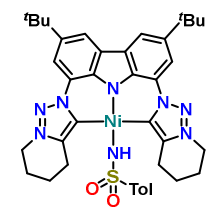

Figure S 88: IR spectrum of 5 at 298K.

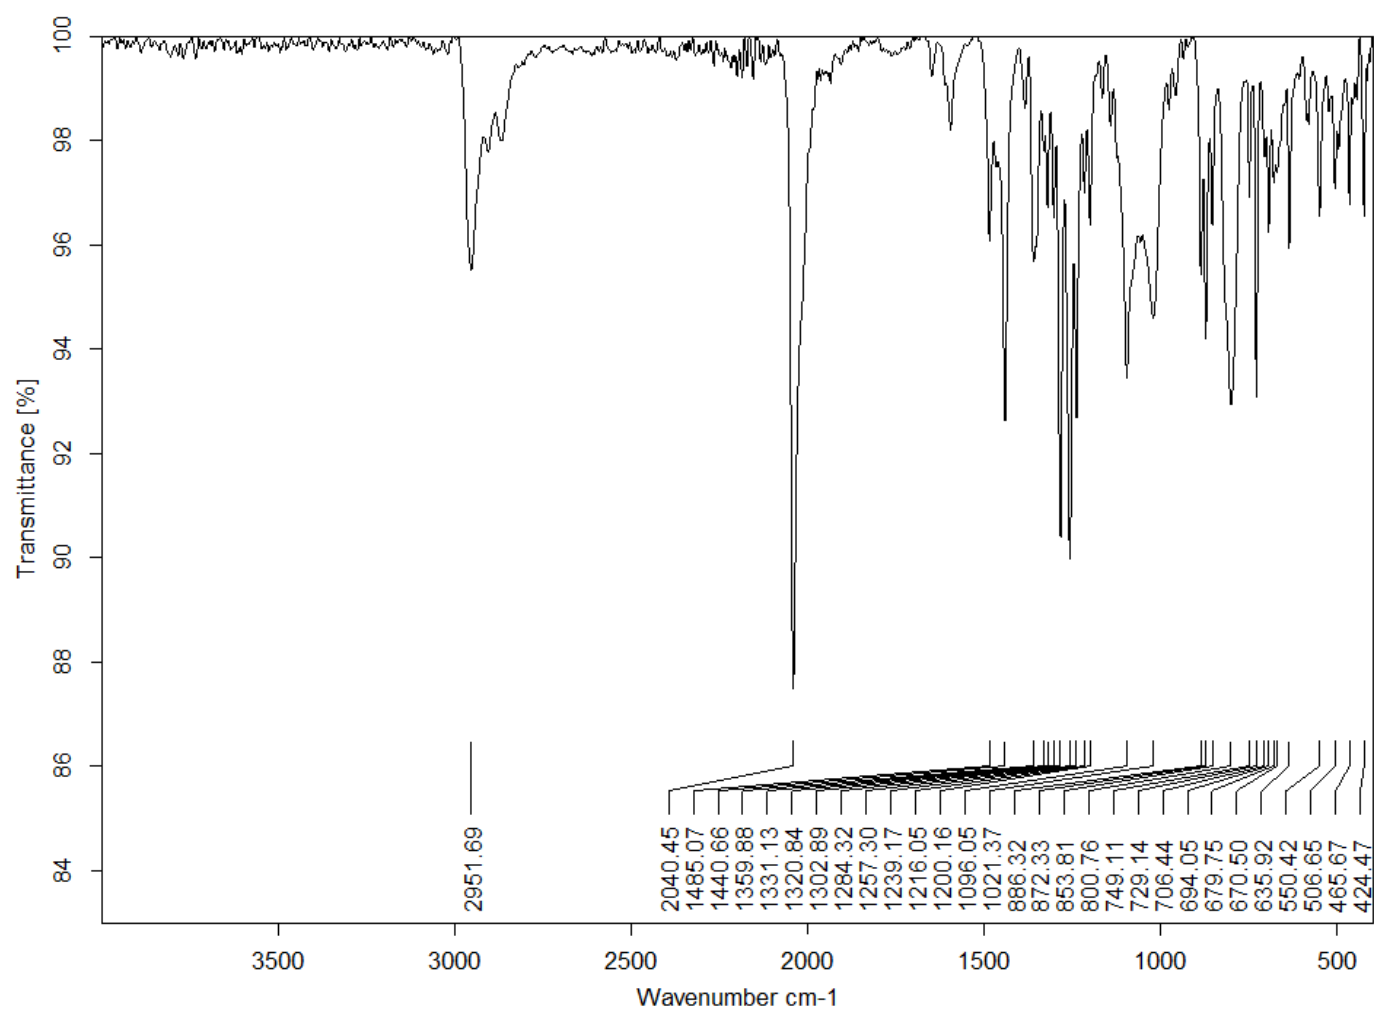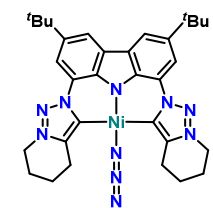

Figure S 89: IR spectrum of 6 at 298K.

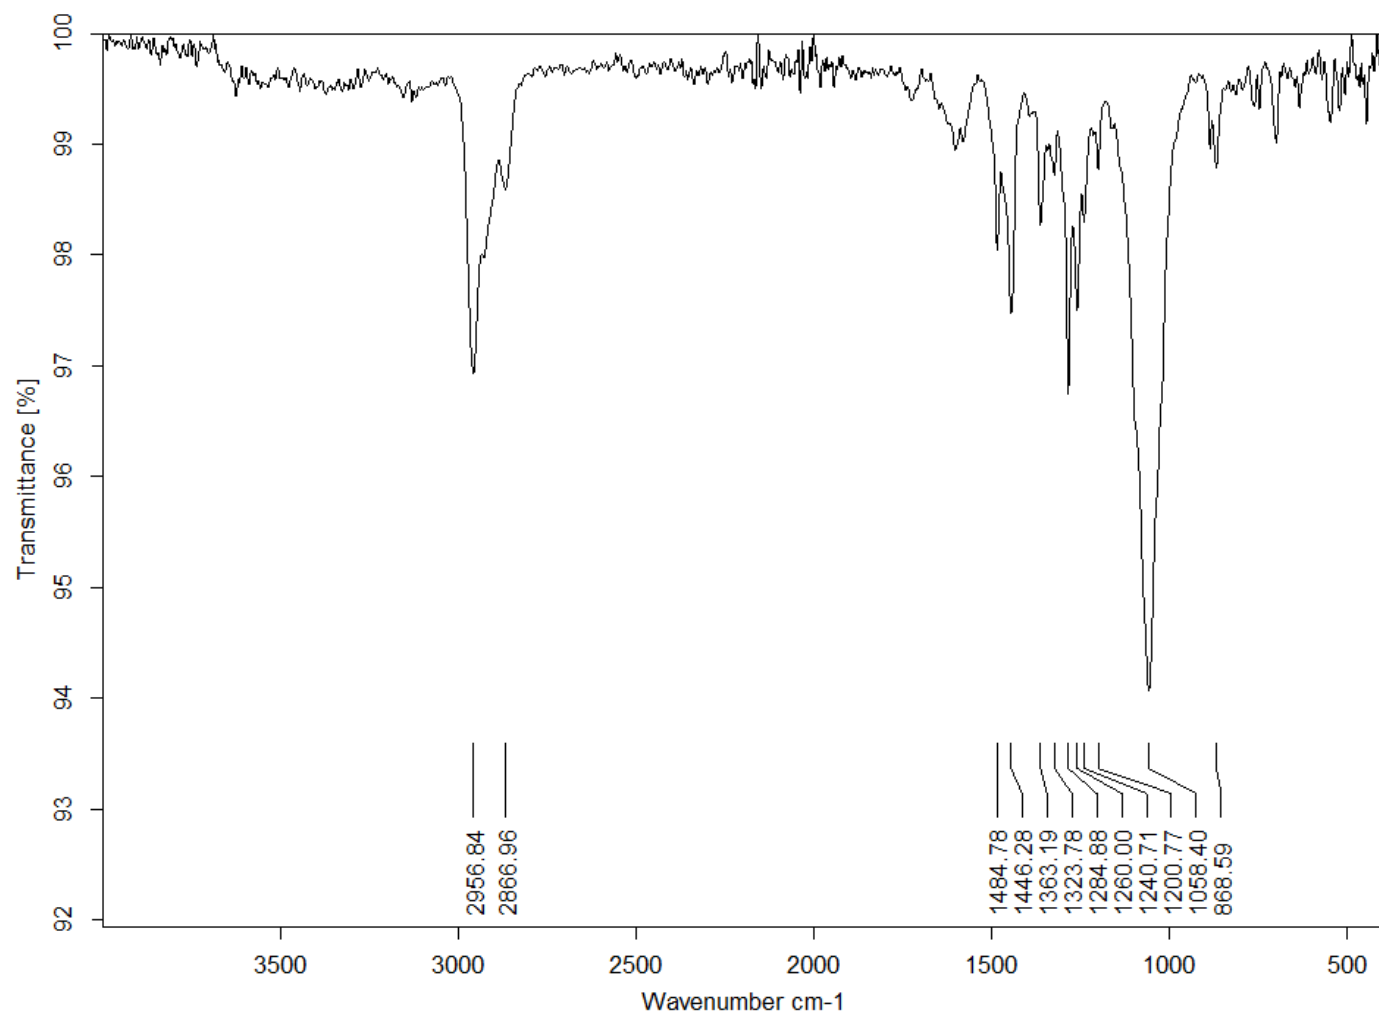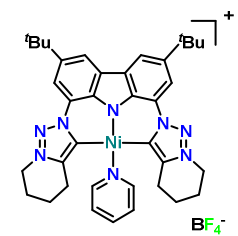

Figure S 90: IR spectrum of 7 at 298K.

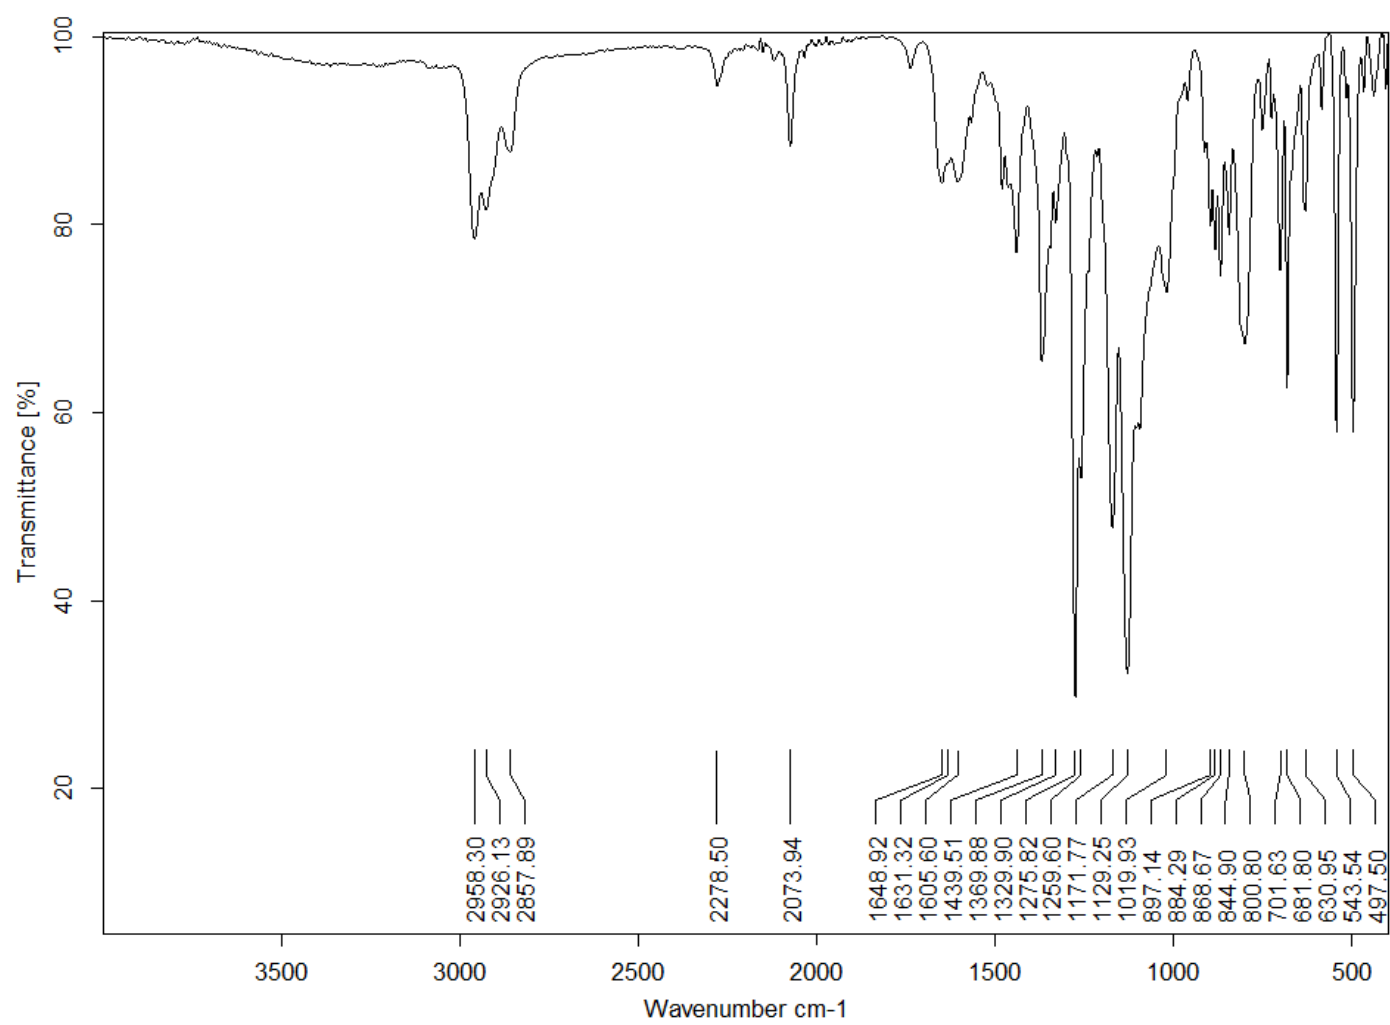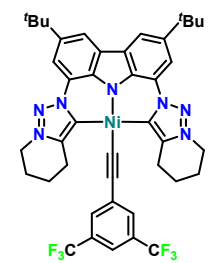

Figure S 91: IR spectrum of **8** at 298K.

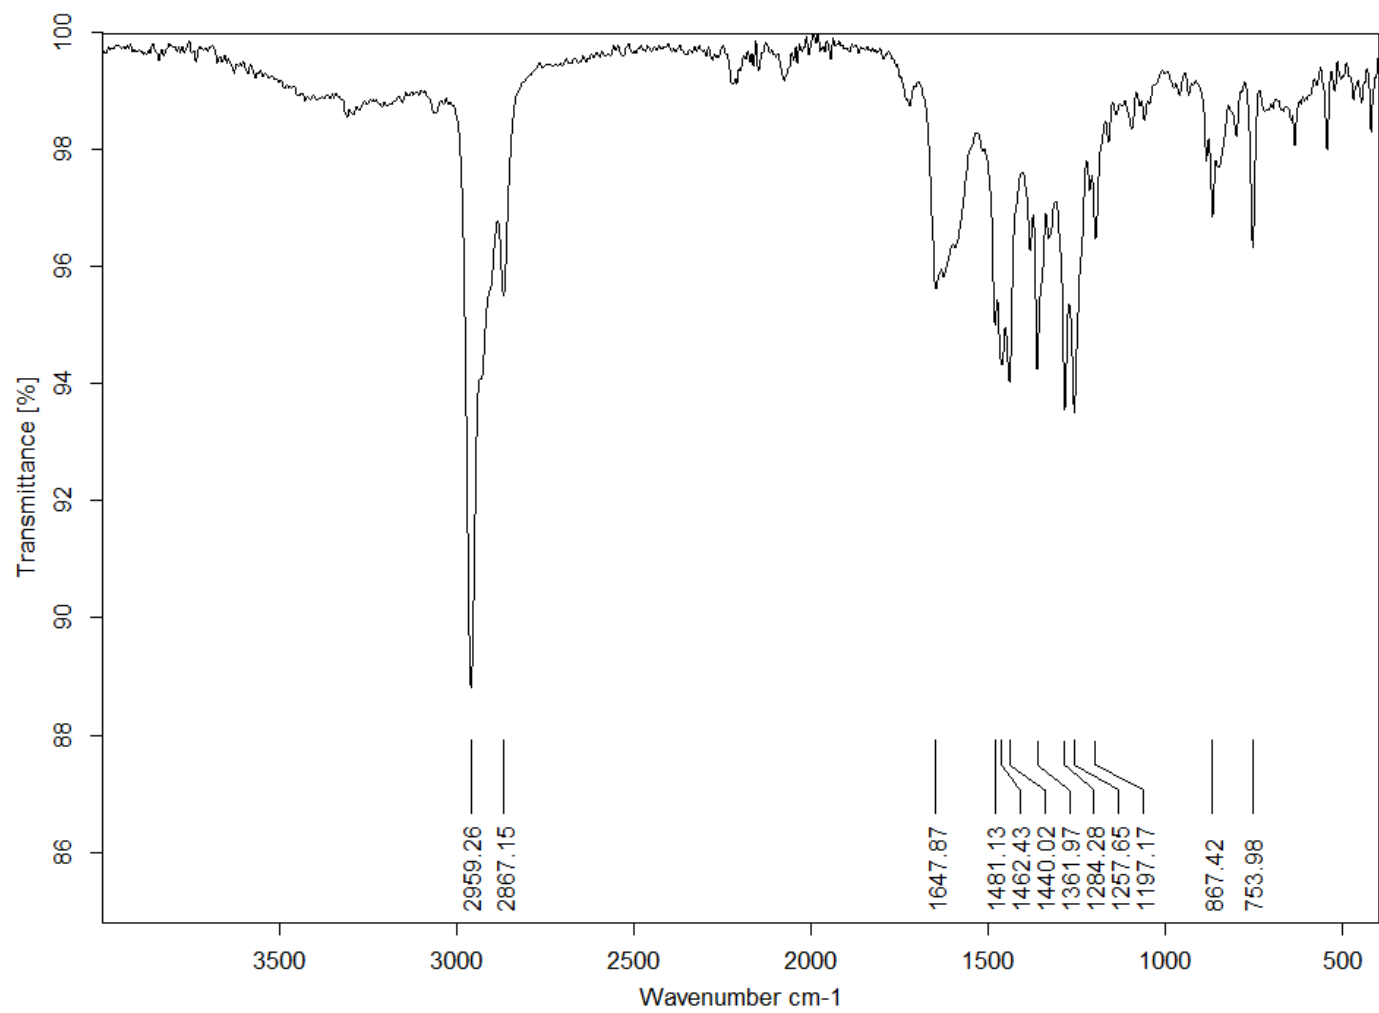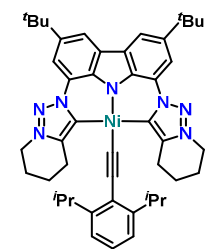

Figure S 92: IR spectrum of **9** at 298K.

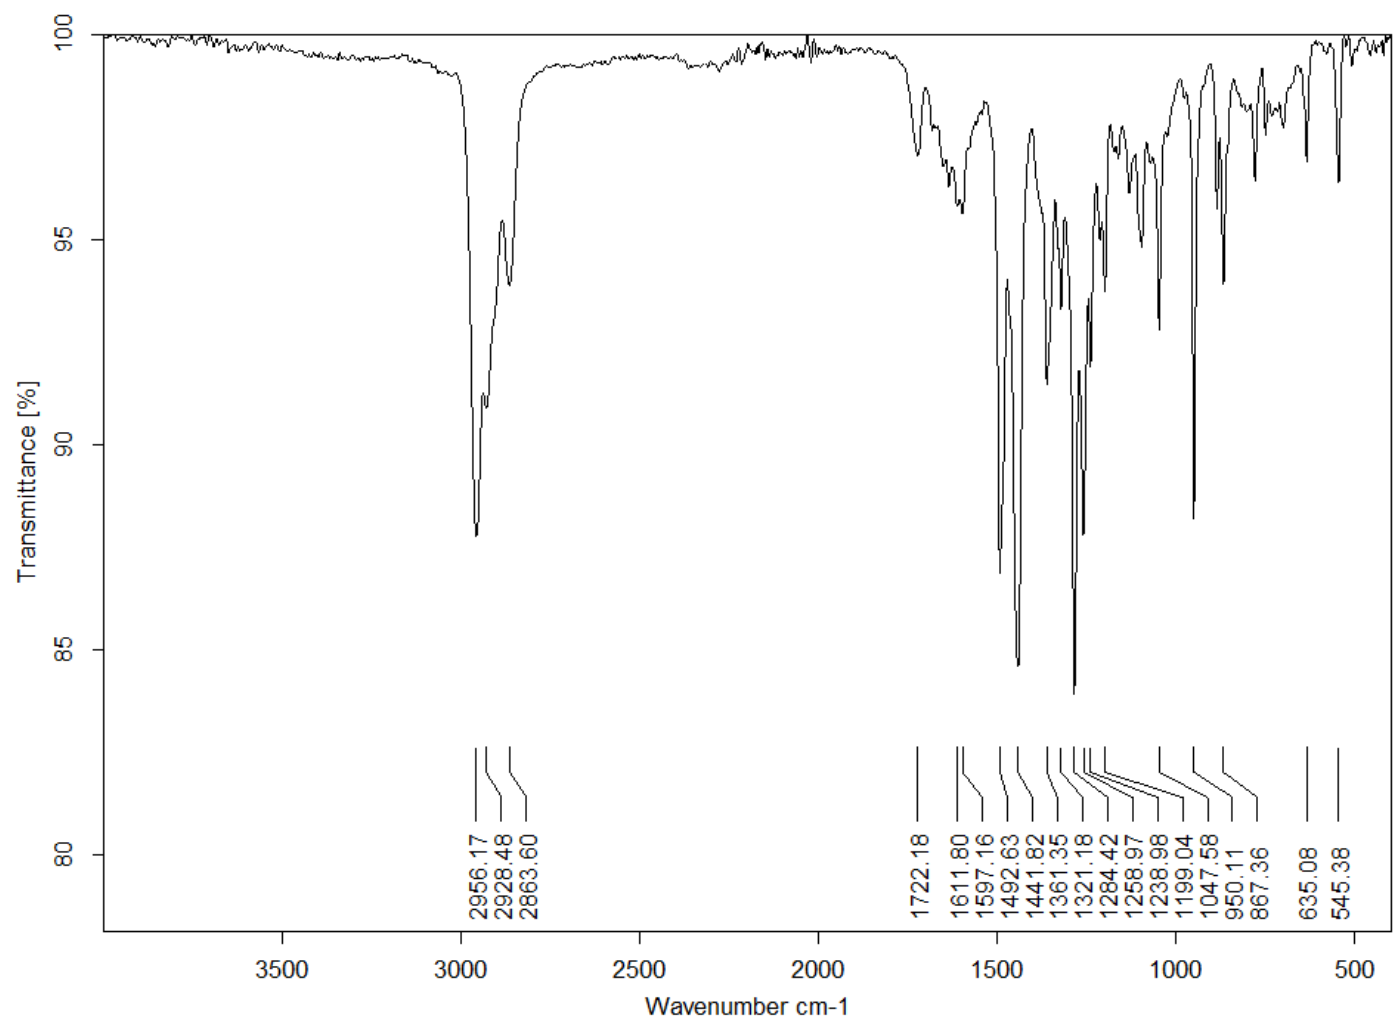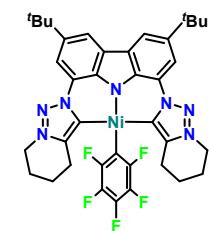

Figure S 93: IR spectrum of **10** at 298K.

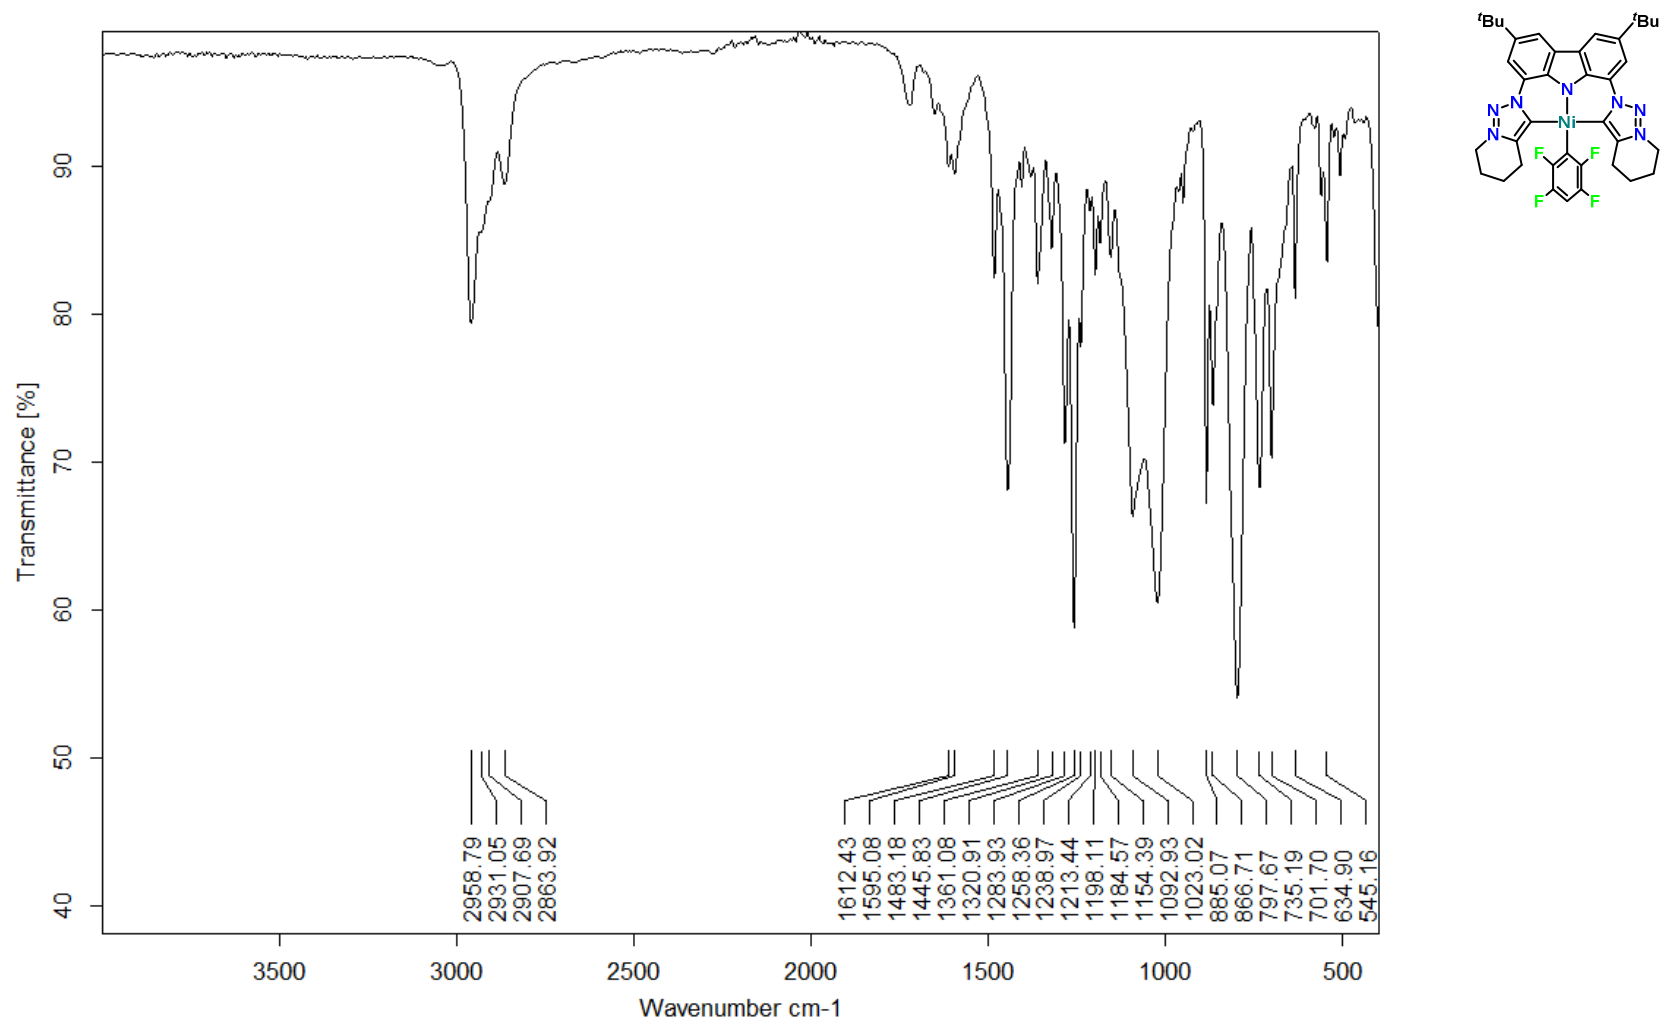

Figure S 94: IR spectrum of **11** at 298K.

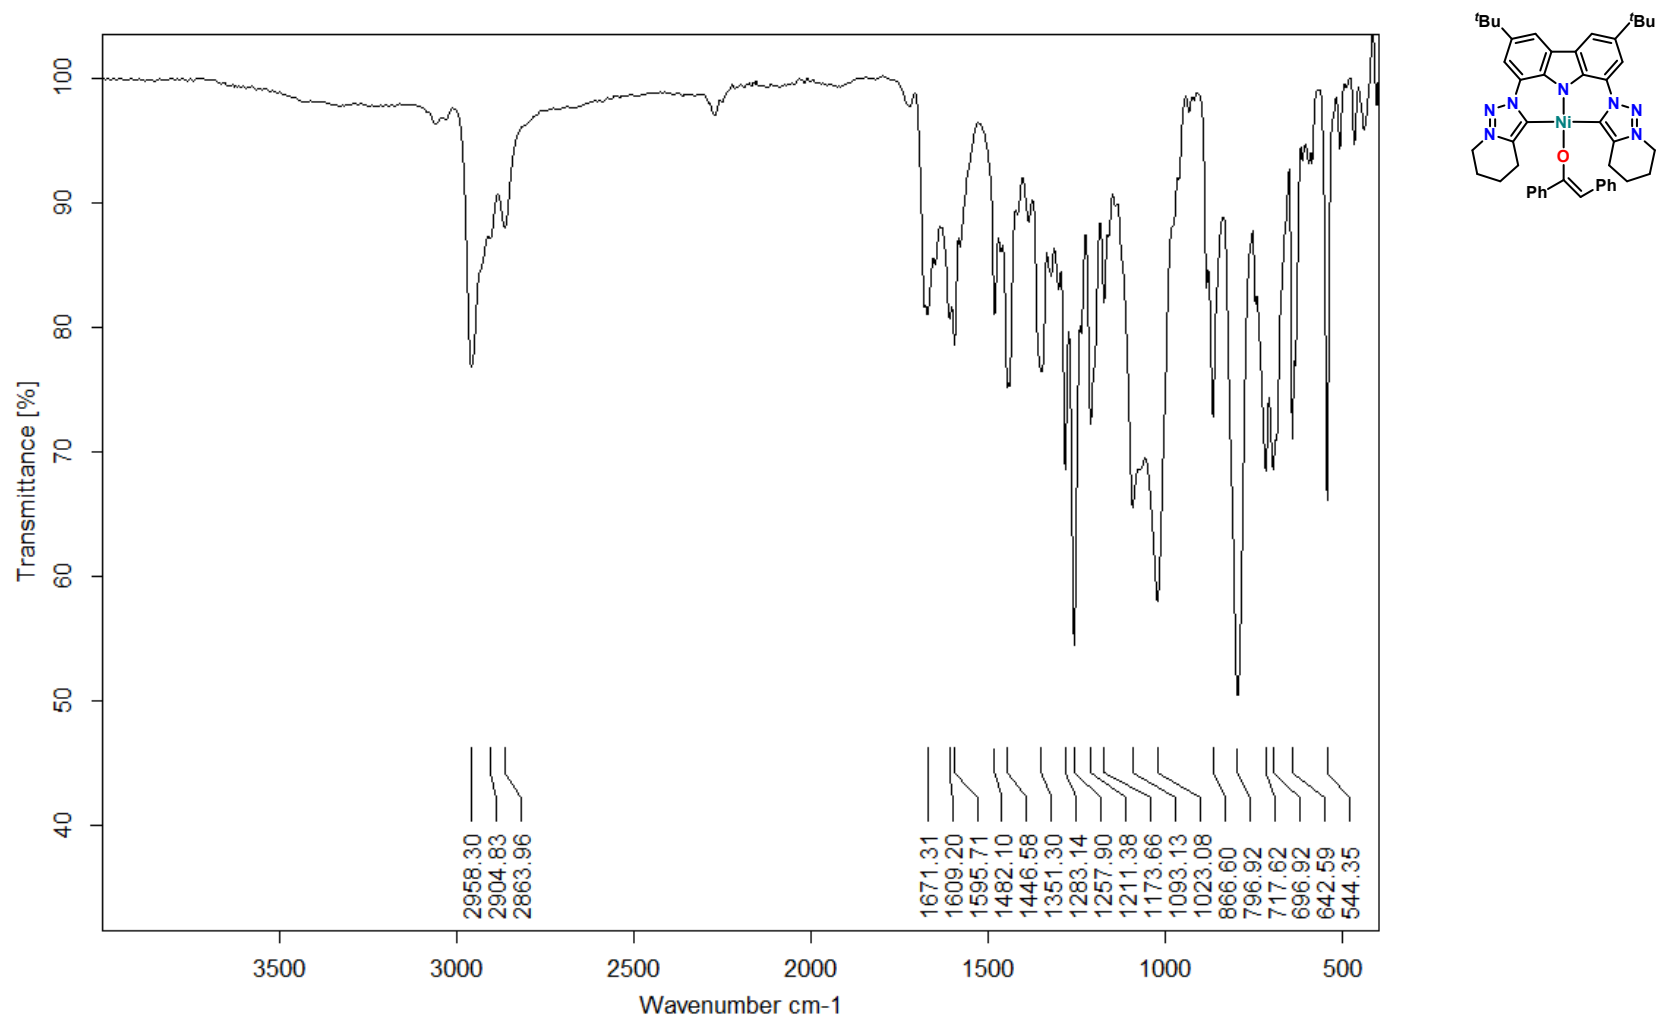

Figure S 95: IR spectrum of **12** at 298K.



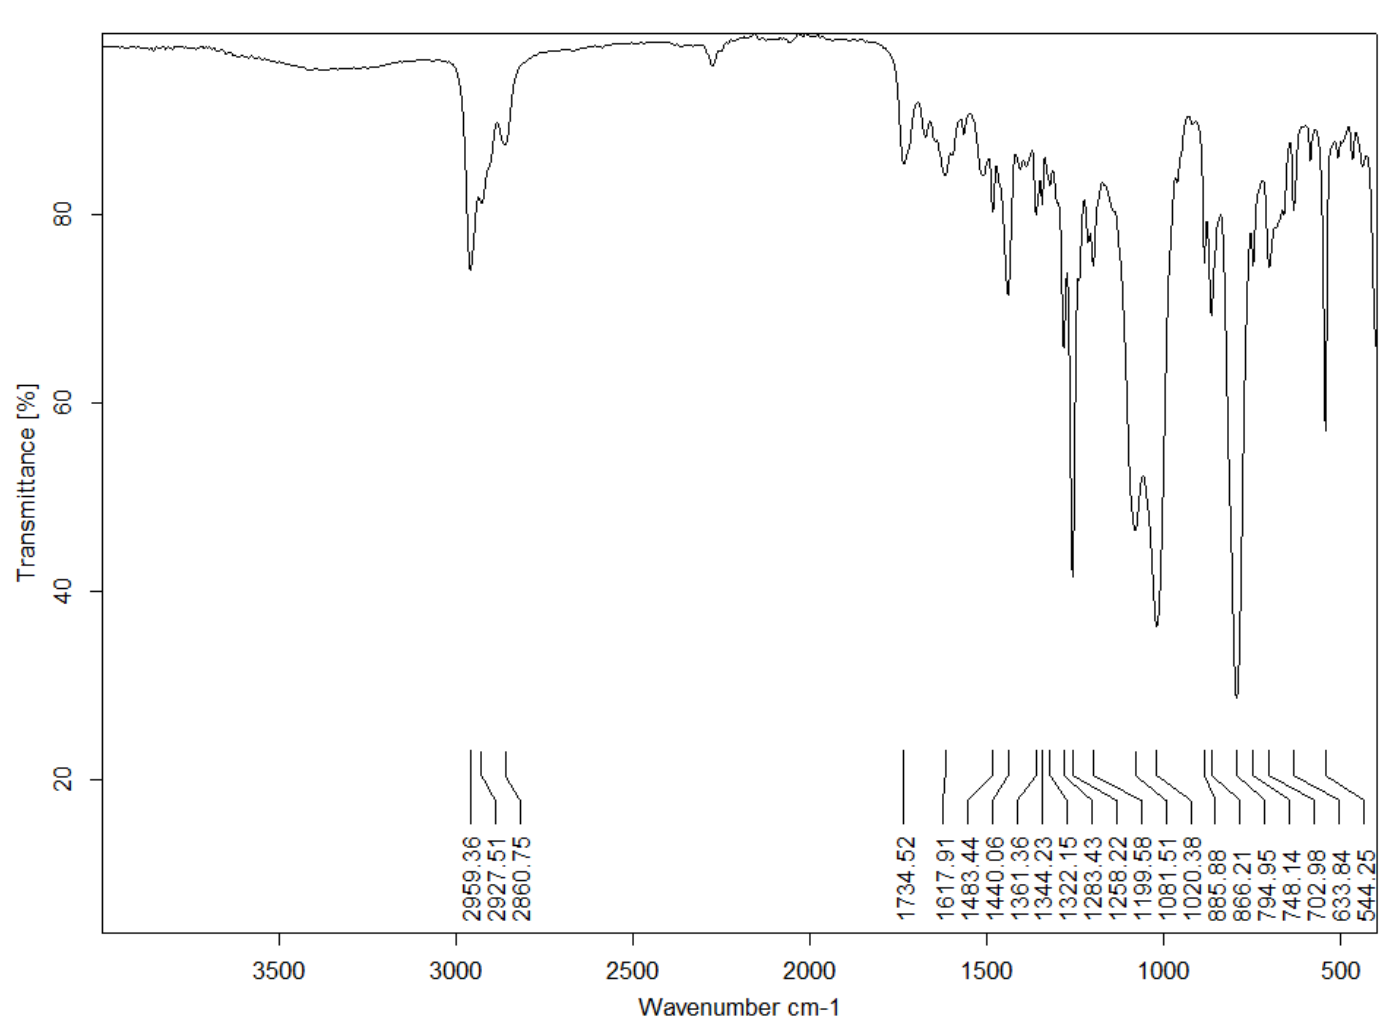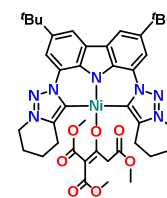

Figure S 96: IR spectrum of **13** at 298K.

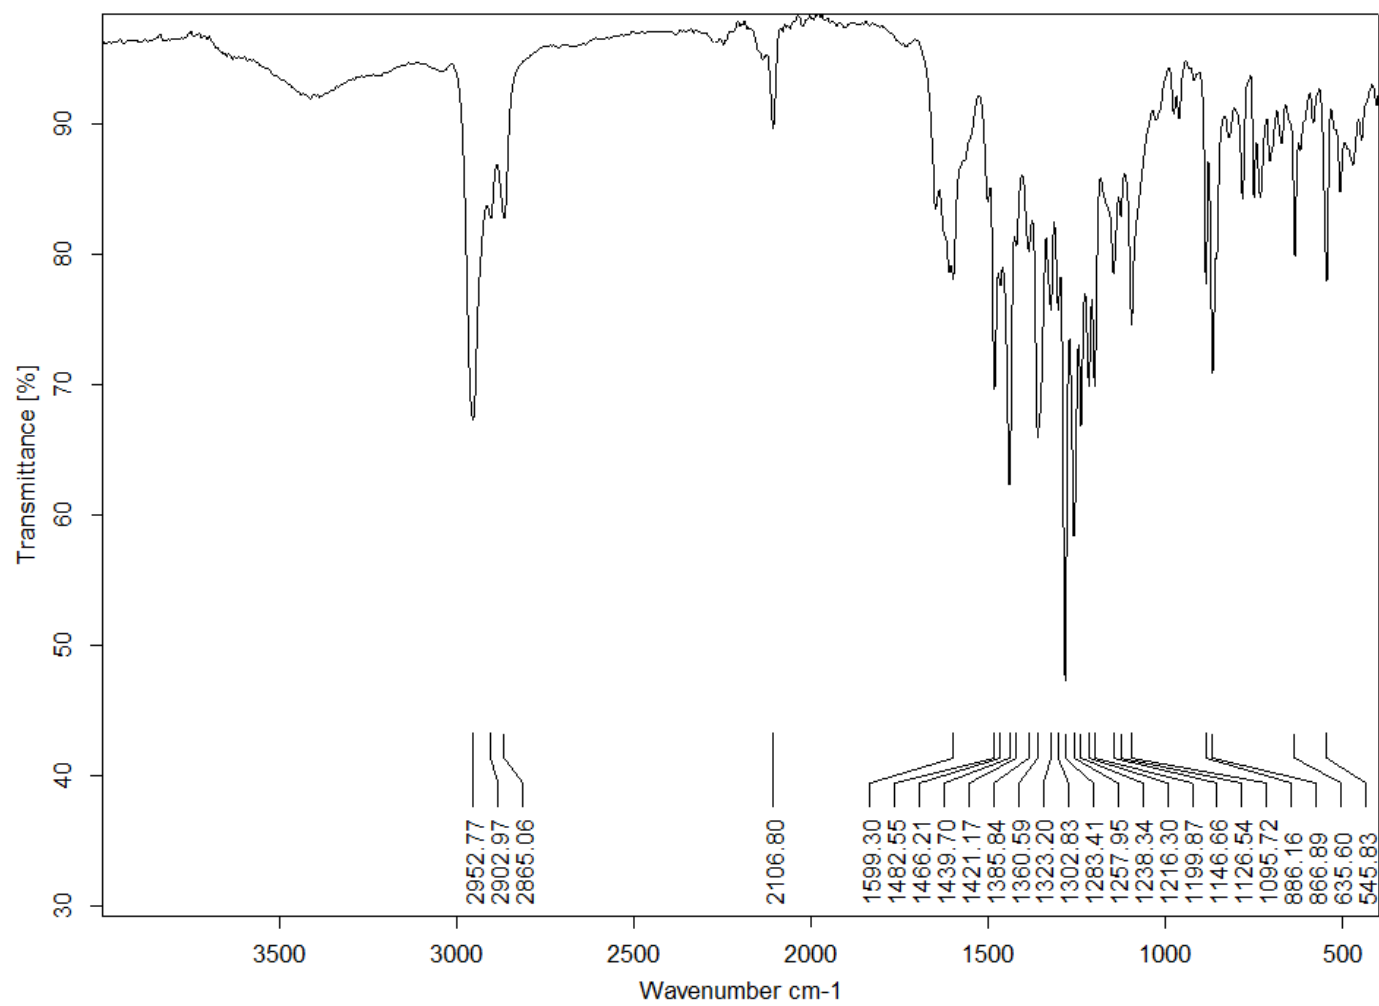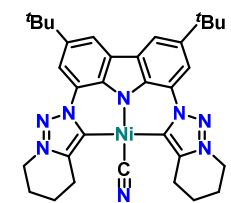

Figure S 97: IR spectrum of **14** at 298K.

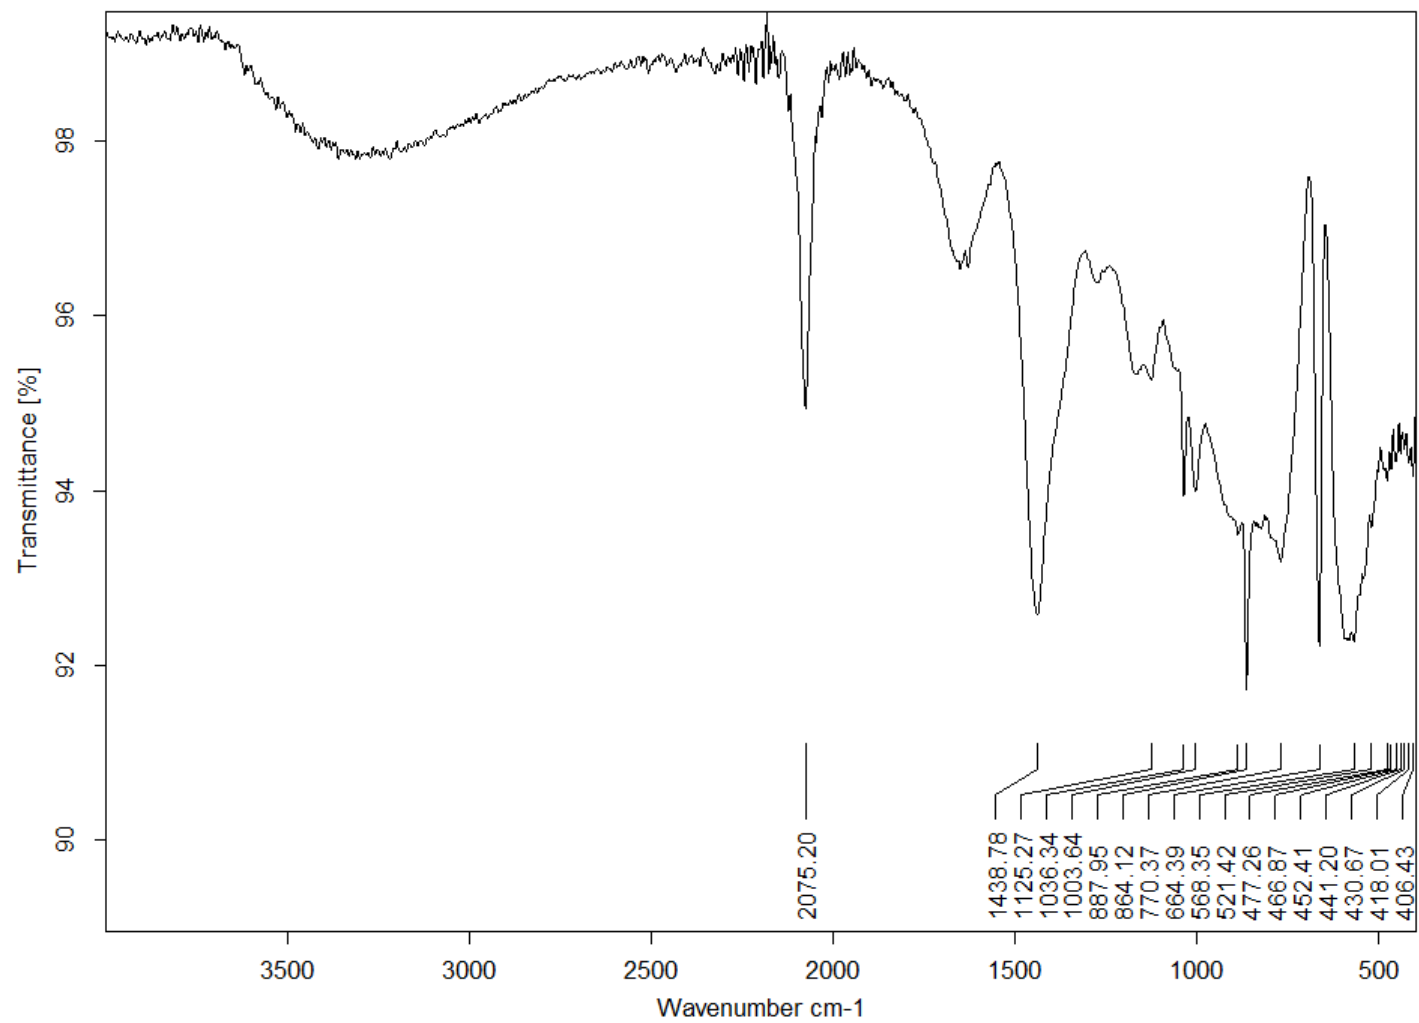

Figure S 98: ATR-IR spectra of solid KCN at 298 K.

### 3. UV-VIS spectra

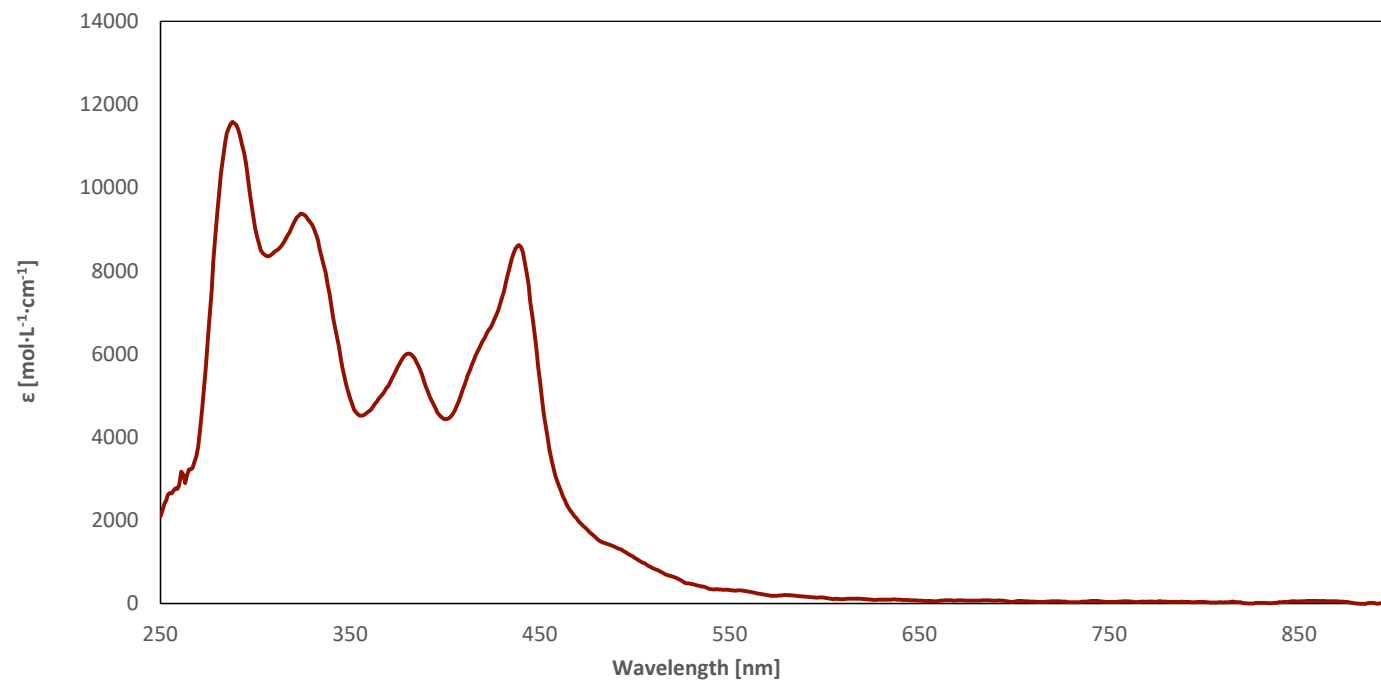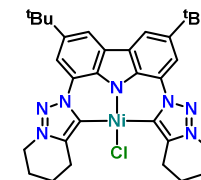

Figure S 99: UV-VIS spectrum of **1** at 298K.

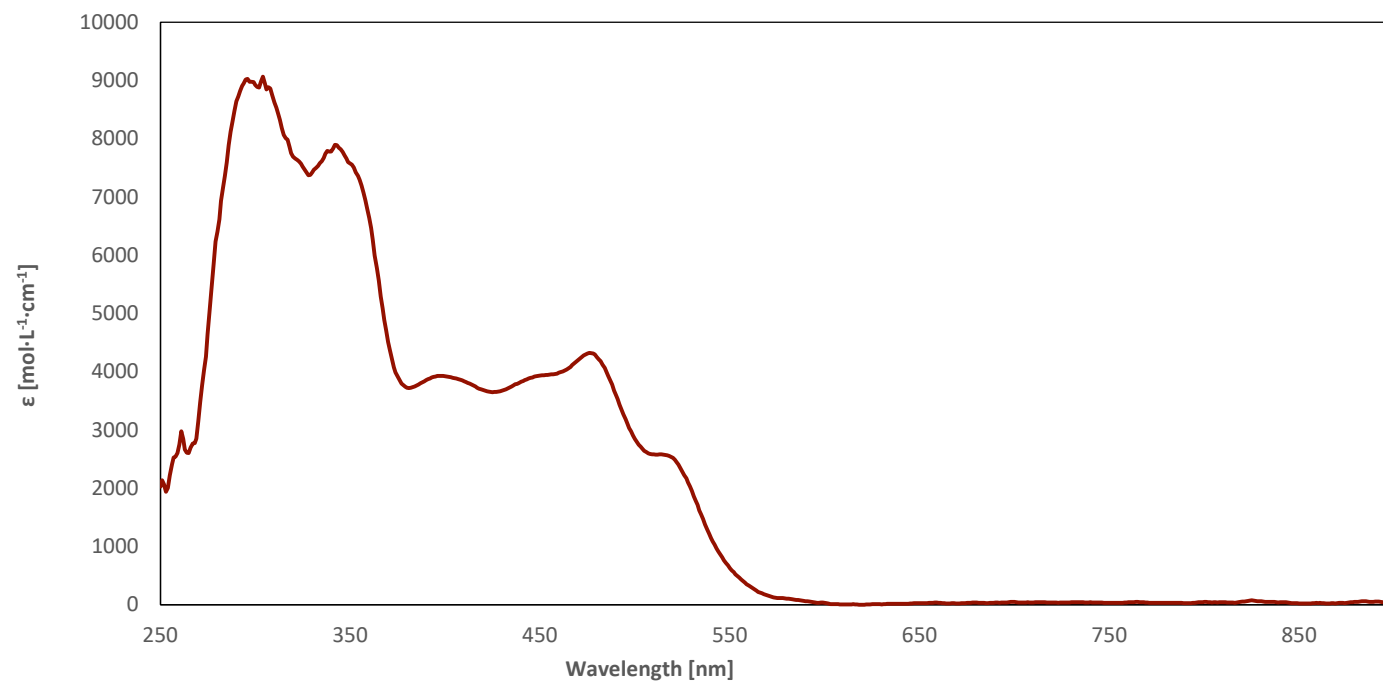

Figure S 100: UV-VIS spectrum of **2** at 298K.

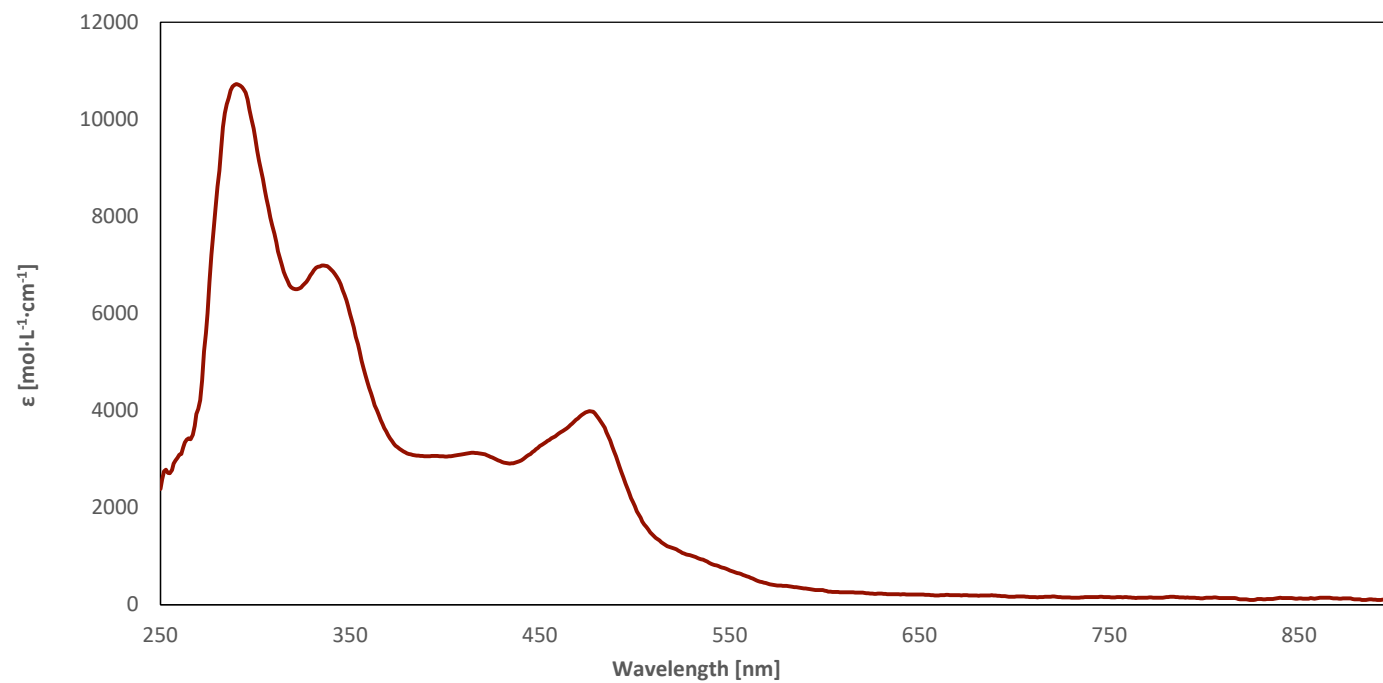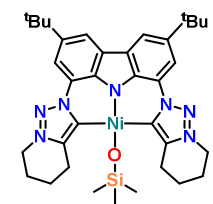

Figure S 101: UV-VIS spectrum of **3** at 298K.

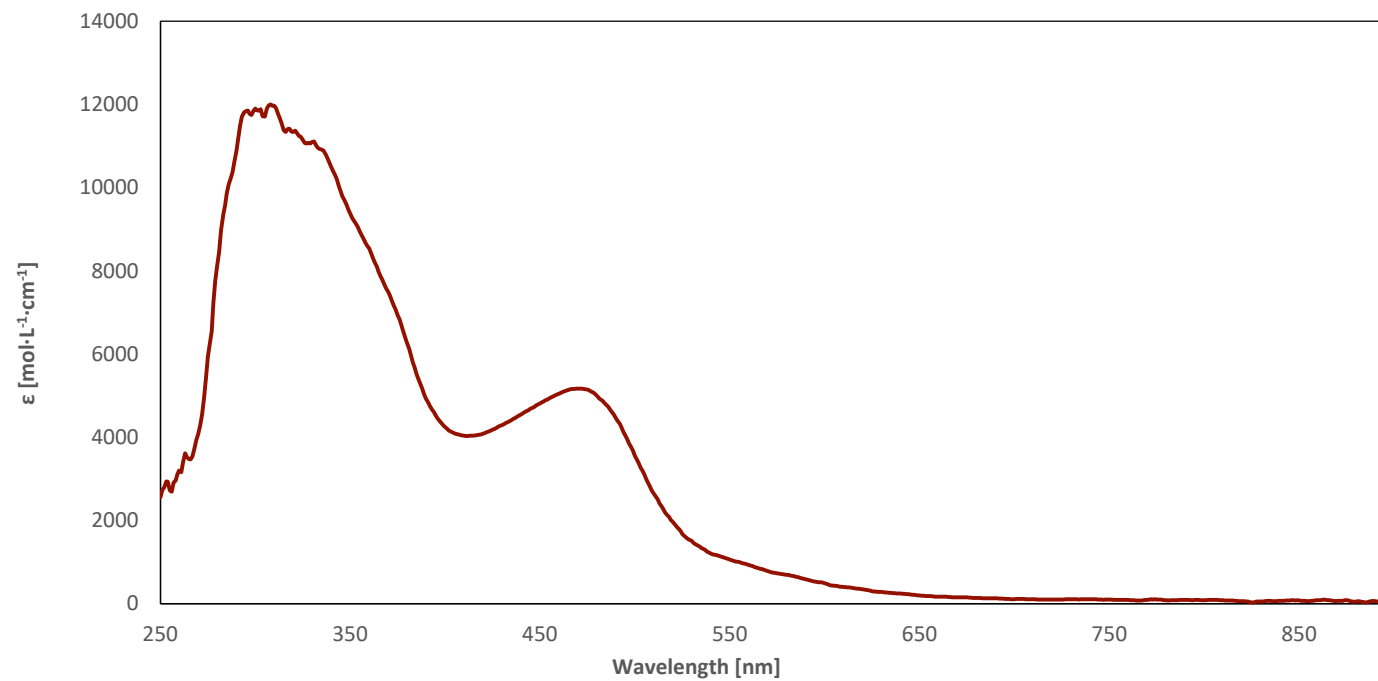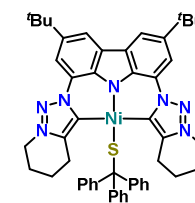

Figure S 102: UV-VIS spectrum of **4** at 298K.

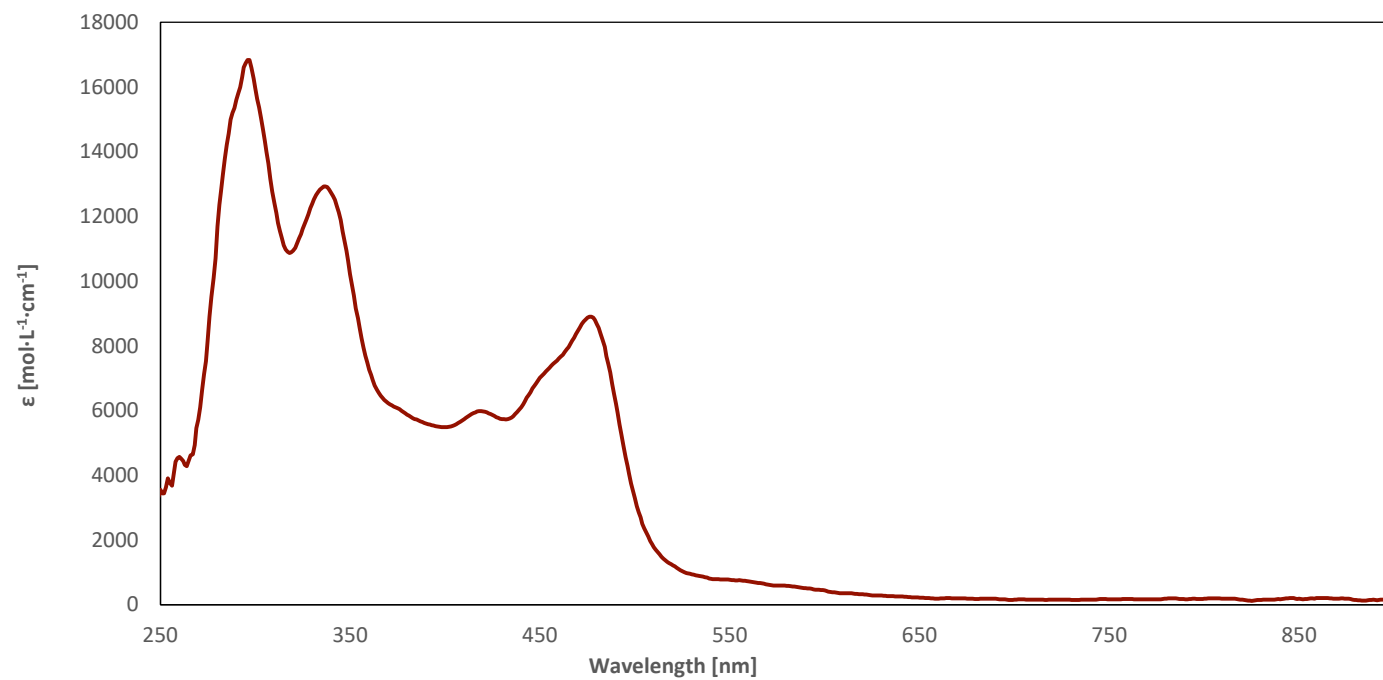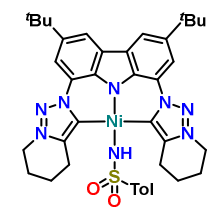

Figure S 103: UV-VIS spectrum of **5** at 298K.



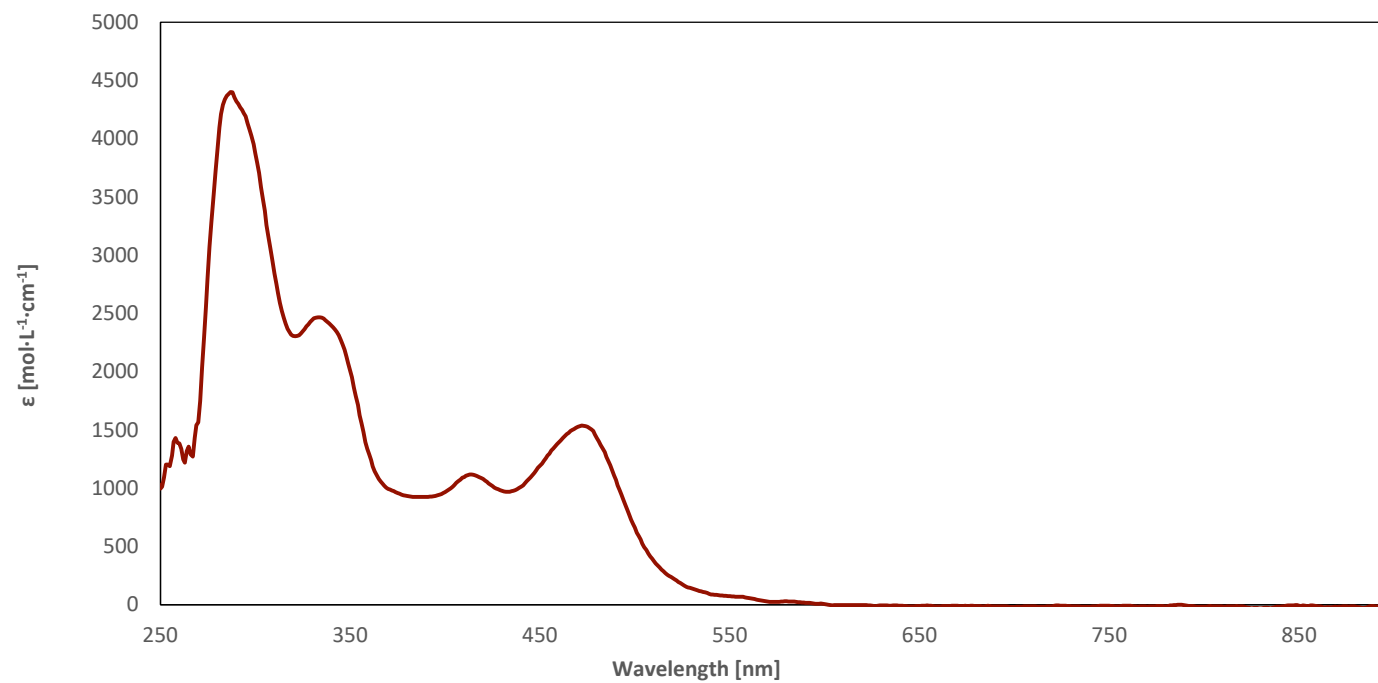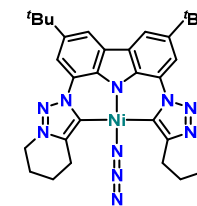

Figure S 104: UV-VIS spectrum of **6** at 298K.

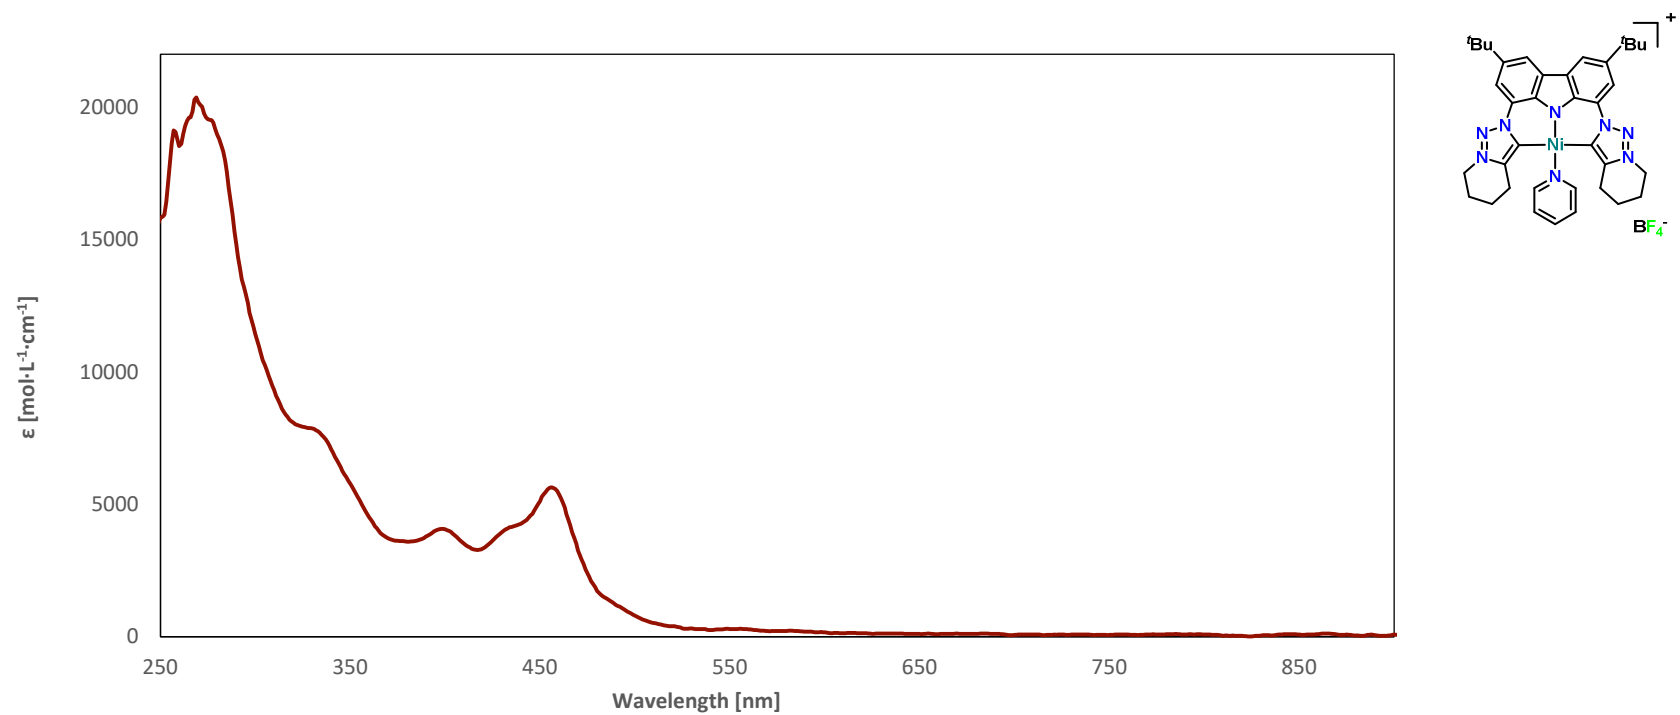

Figure S 105: UV-VIS spectrum of **7** at 298K.

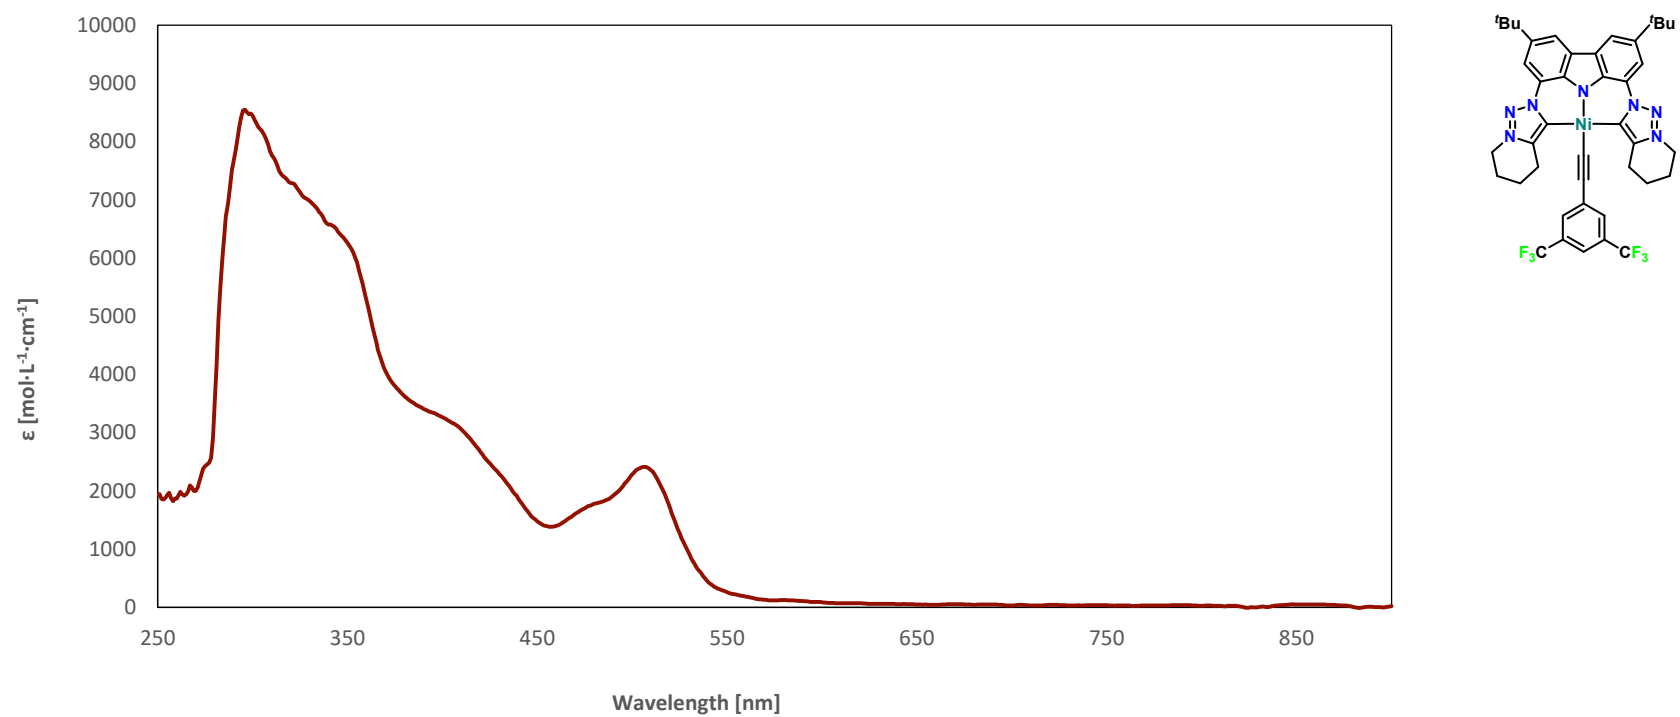

Figure S 106: UV-VIS spectrum of **8** at 298K.

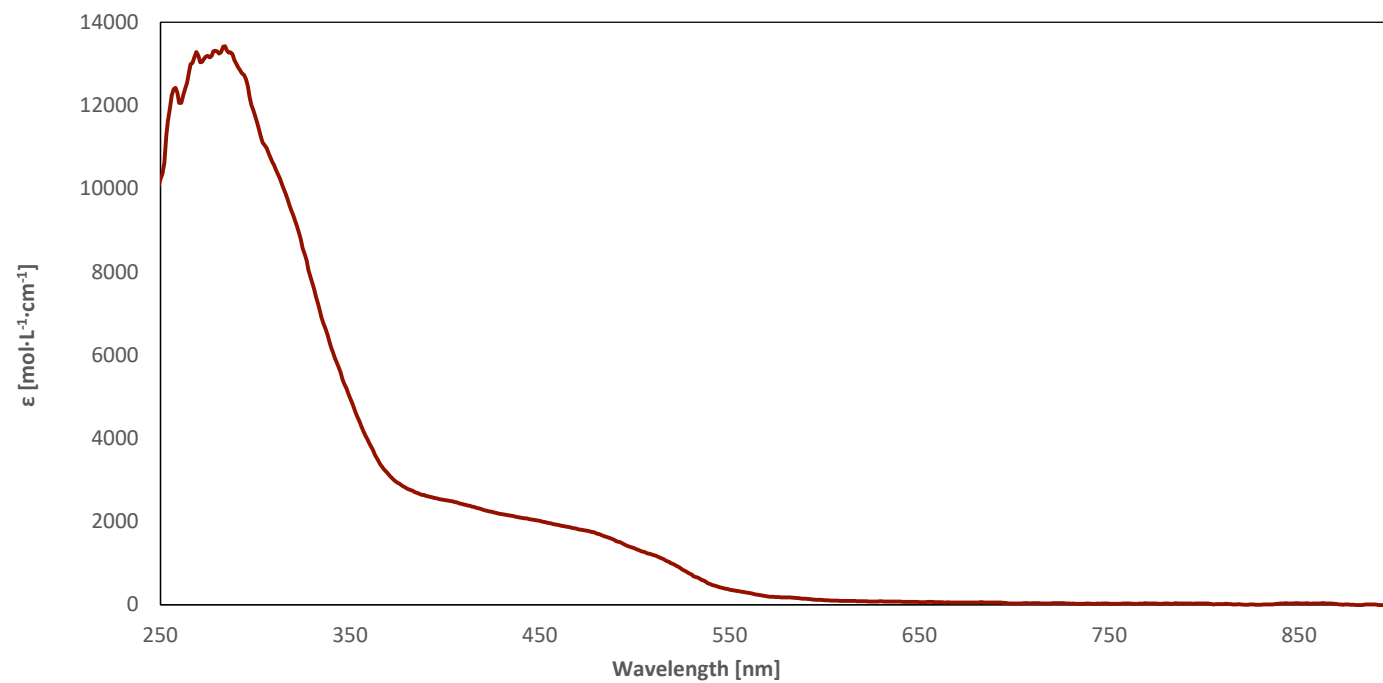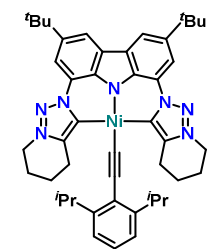

Figure S 107: UV-VIS spectrum of **9** at 298K.

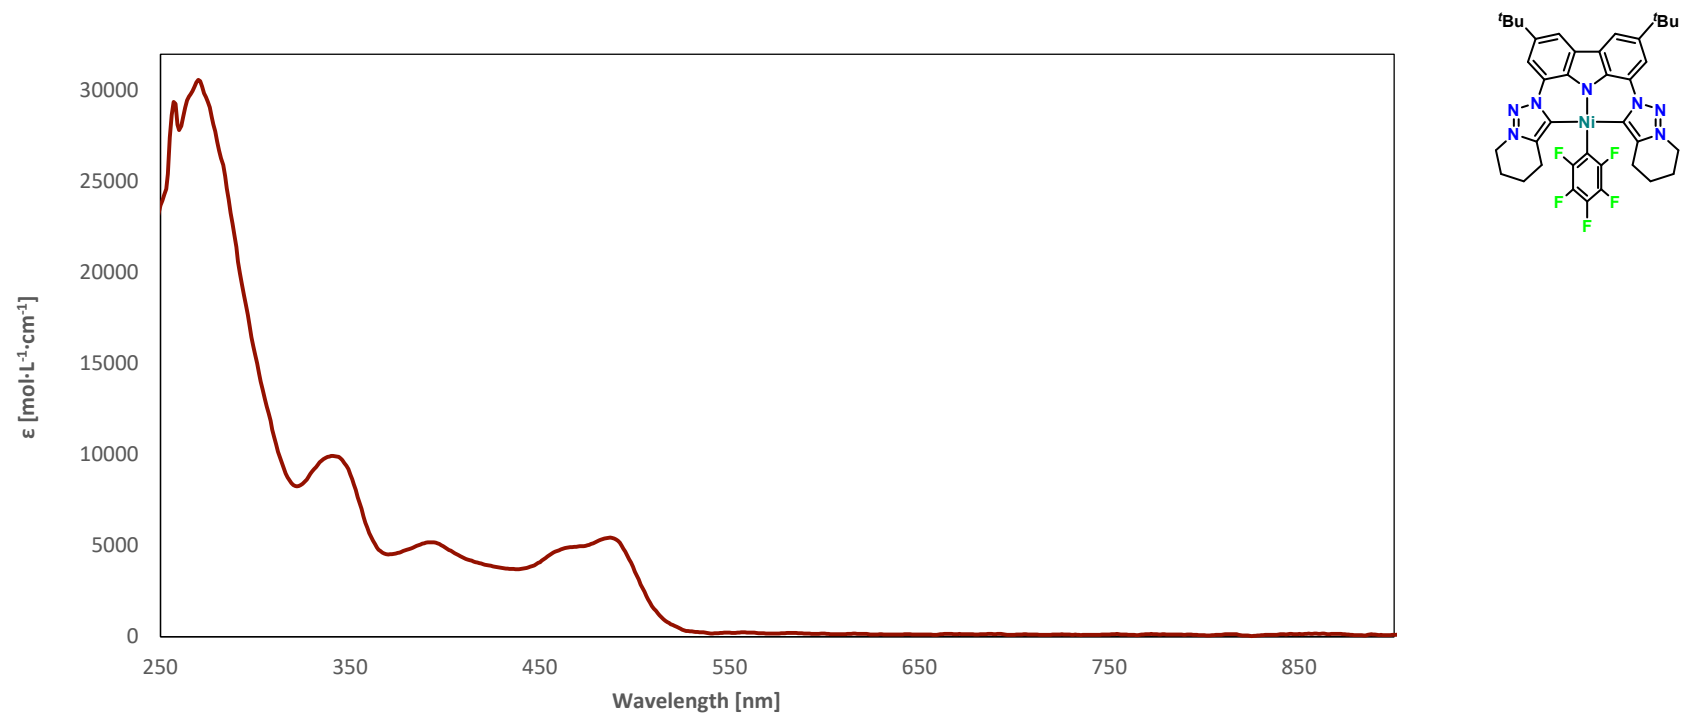

Figure S 108: UV-VIS spectrum of **10** at 298K.

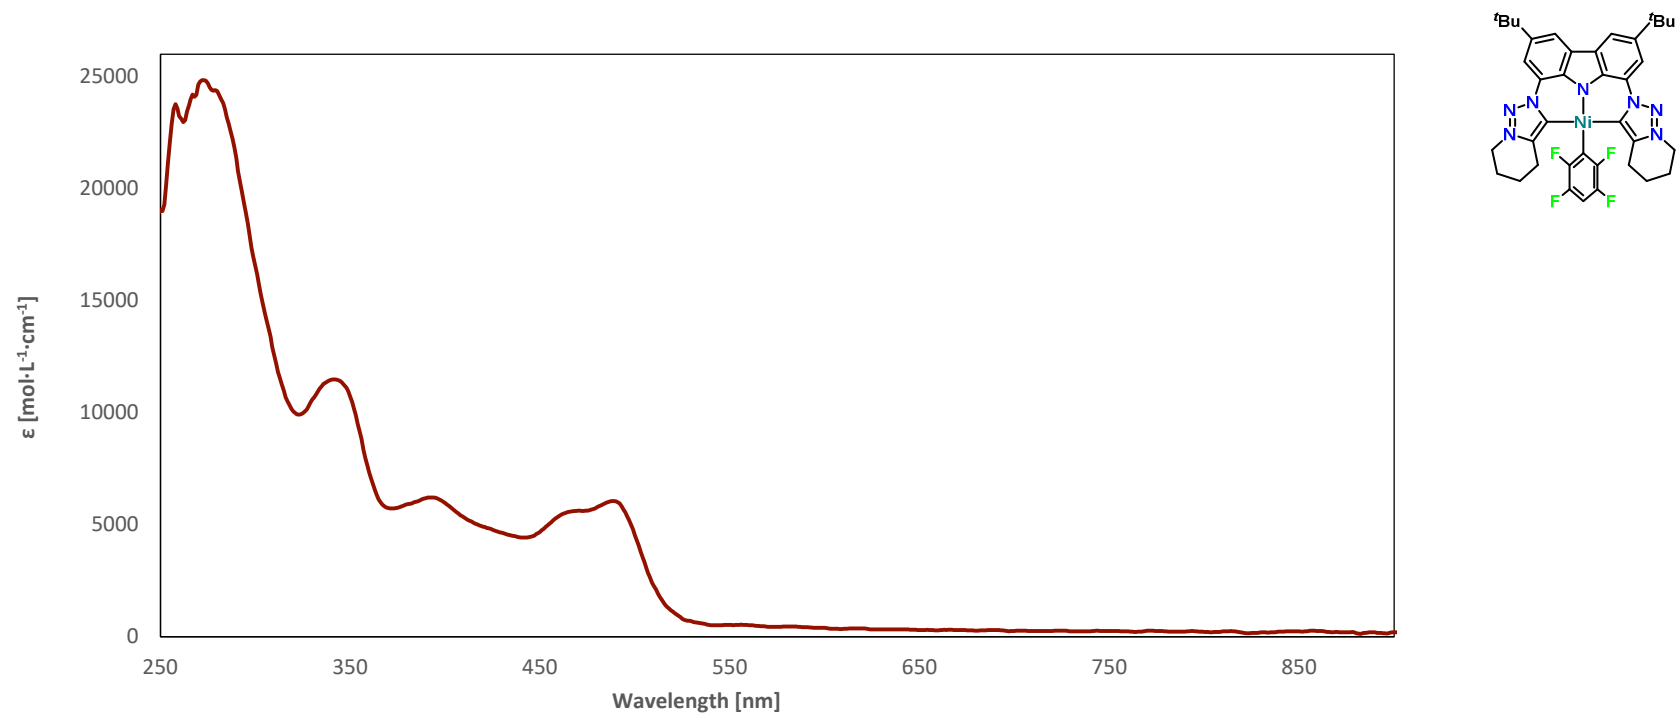

Figure S 109: UV-VIS spectrum of **11** at 298K.

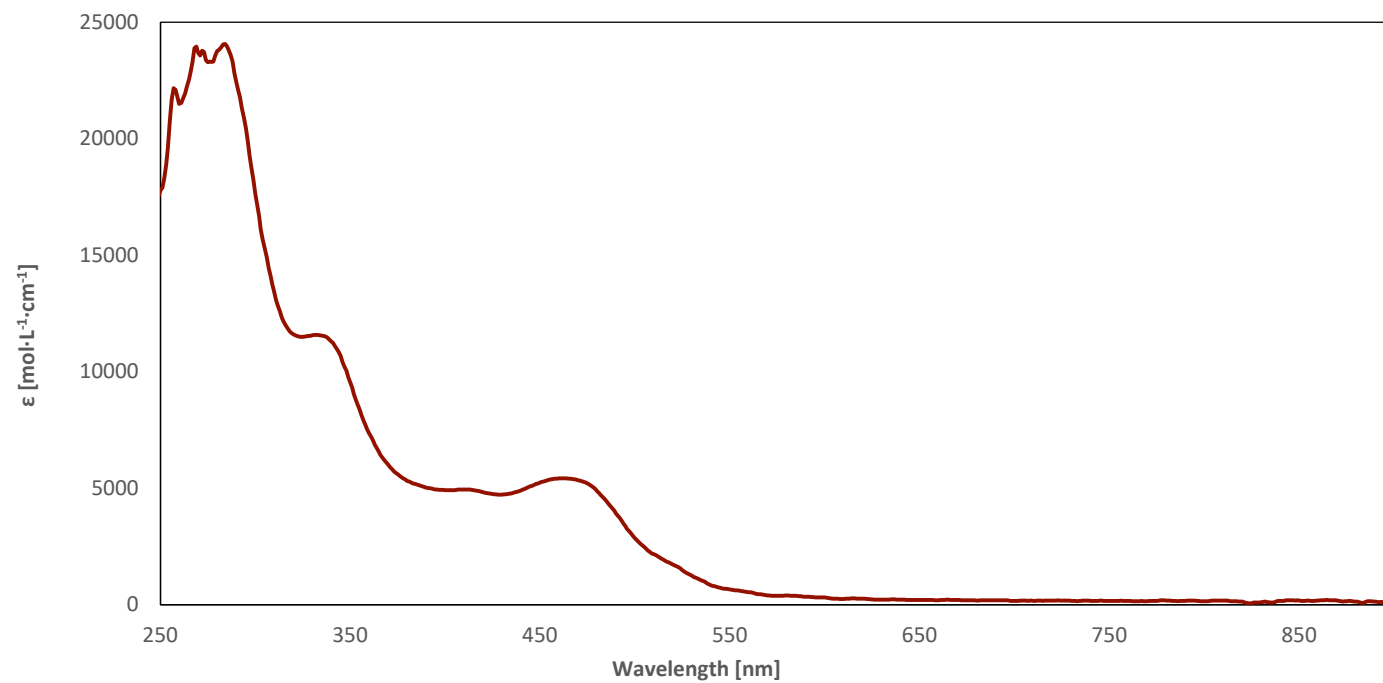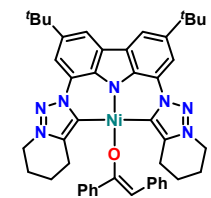

Figure S 110: UV-VIS spectrum of **12** at 298K.

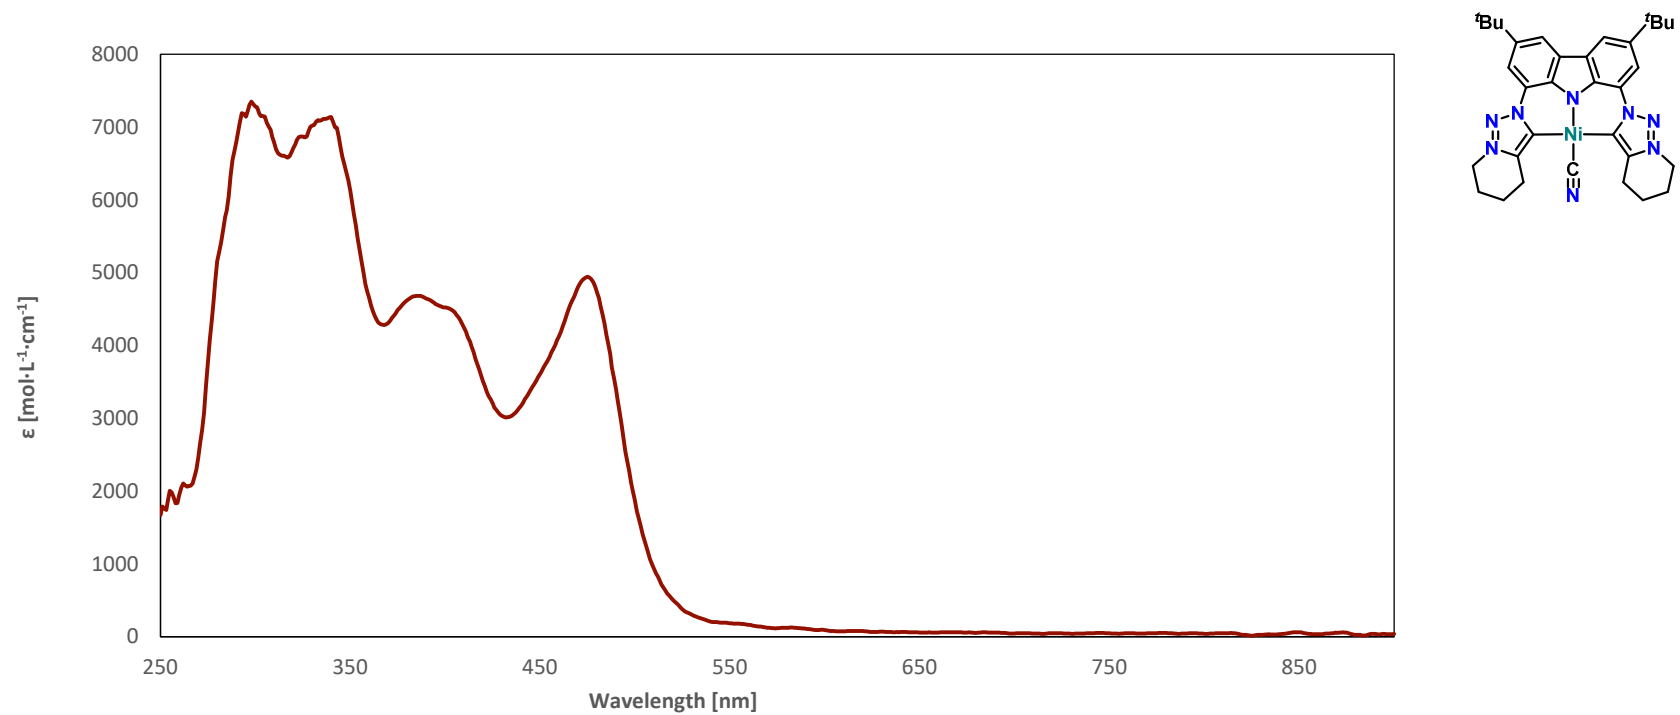

Figure S 111: UV-VIS spectrum of **14** at 298K.



## 4. Crystallographic details

Table S1: Crystallographic data for complexes 1 – 8

|                                                             | 1                                                                              | 2[H <sub>2</sub> O]                                                           | 3                                                                                             | 4*                                                                            | 5                                                                                             | 6**                                                             | 7**                                                                                          | 8                                                                             |
|-------------------------------------------------------------|--------------------------------------------------------------------------------|-------------------------------------------------------------------------------|-----------------------------------------------------------------------------------------------|-------------------------------------------------------------------------------|-----------------------------------------------------------------------------------------------|-----------------------------------------------------------------|----------------------------------------------------------------------------------------------|-------------------------------------------------------------------------------|
| Chemical formula                                            | C <sub>32</sub> H <sub>38</sub> N <sub>7</sub> Cl <sub>1</sub> Ni <sub>1</sub> | C <sub>32</sub> H <sub>39</sub> N <sub>7</sub> O <sub>1</sub> Ni <sub>1</sub> | C <sub>35</sub> H <sub>47</sub> N <sub>7</sub> O <sub>1</sub> Si <sub>1</sub> Ni <sub>1</sub> | C <sub>51</sub> H <sub>53</sub> N <sub>7</sub> S <sub>1</sub> Ni <sub>1</sub> | C <sub>39</sub> H <sub>46</sub> N <sub>8</sub> O <sub>2</sub> Si <sub>1</sub> Ni <sub>1</sub> | C <sub>32</sub> H <sub>38</sub> N <sub>10</sub> Ni <sub>1</sub> | C <sub>37</sub> H <sub>43</sub> N <sub>8</sub> Ni <sub>1</sub> B <sub>1</sub> F <sub>4</sub> | C <sub>42</sub> H <sub>41</sub> N <sub>7</sub> F <sub>6</sub> Ni <sub>1</sub> |
| <i>M<sub>r</sub></i>                                        | 699.78                                                                         | 686.53                                                                        | 753.52                                                                                        | 1039.04                                                                       | 827.71                                                                                        | 706.36                                                          | 745.31                                                                                       | 1000.73                                                                       |
| Crystal system                                              | Triclinic                                                                      | Triclinic                                                                     | Triclinic                                                                                     | Monoclinic                                                                    | Monoclinic                                                                                    | Triclinic                                                       | Monoclinic                                                                                   | Triclinic                                                                     |
| Space group                                                 | <i>P</i> -1                                                                    | <i>P</i> -1                                                                   | <i>P</i> -1                                                                                   | <i>P</i> 2 <sub>1</sub> / <i>c</i>                                            | <i>P</i> 2 <sub>1</sub> / <i>c</i>                                                            | <i>P</i> -1                                                     | <i>P</i> 2 <sub>1</sub> / <i>c</i>                                                           | <i>P</i> -1                                                                   |
| <i>a</i> (Å)                                                | 7.6503(5)                                                                      | 7.7434(4)                                                                     | 11.4300(8)                                                                                    | 15.78(5)                                                                      | 16.3158(15)                                                                                   | 7.7265(16)                                                      | 11.8809(6)                                                                                   | 9.6617(5)                                                                     |
| <i>b</i> (Å)                                                | 13.2697(8)                                                                     | 13.6237(7)                                                                    | 13.2816(11)                                                                                   | 17.42(5)                                                                      | 21.3714(16)                                                                                   | 13.252(2)                                                       | 10.3569(4)                                                                                   | 15.7074(8)                                                                    |
| <i>c</i> (Å)                                                | 16.4268(11)                                                                    | 16.4176(9)                                                                    | 13.6078(12)                                                                                   | 20.19(6)                                                                      | 12.1193(11)                                                                                   | 16.223(3)                                                       | 27.9319(13)                                                                                  | 18.8918(10)                                                                   |
| $\alpha$ (°)                                                | 77.840(3)                                                                      | 83.877(2)                                                                     | 72.352(3)                                                                                     | 90                                                                            | 90                                                                                            | 77.721(7)                                                       | 90                                                                                           | 67.512(2)                                                                     |
| $\beta$ (°)                                                 | 86.166(3)                                                                      | 85.612(2)                                                                     | 70.181(3)                                                                                     | 103.02(12)                                                                    | 96.097(3)                                                                                     | 85.348(7)                                                       | 93.247(2)                                                                                    | 75.835(2)                                                                     |
| $\gamma$ (°)                                                | 79.990(3)                                                                      | 77.880(2)                                                                     | 74.277(3)                                                                                     | 90                                                                            | 90                                                                                            | 79.973(7)                                                       | 90                                                                                           | 77.315(2)                                                                     |
| <i>V</i> (Å <sup>3</sup> )                                  | 1604.58(18)                                                                    | 1681.08(15)                                                                   | 1819.1(3)                                                                                     | 5408(28)                                                                      | 4202.0(6)                                                                                     | 1596.7(5)                                                       | 3431.5(3)                                                                                    | 2542.9(2)                                                                     |
| <i>Z</i>                                                    | 2                                                                              | 2                                                                             | 2                                                                                             | 4                                                                             | 4                                                                                             | 2                                                               | 4                                                                                            | 2                                                                             |
| Density (g cm <sup>-3</sup> )                               | 1.448                                                                          | 1.356                                                                         | 1.376                                                                                         | 1.276                                                                         | 1.308                                                                                         | 1.469                                                           | 1.443                                                                                        | 1.307                                                                         |
| <i>F</i> (000)                                              | 732                                                                            | 732                                                                           | 796                                                                                           | 2208                                                                          | 1752                                                                                          | 740                                                             | 1560                                                                                         | 1048                                                                          |
| Radiation Type                                              | MoK $\alpha$                                                                   | MoK $\alpha$                                                                  | MoK $\alpha$                                                                                  | MoK $\alpha$                                                                  | MoK $\alpha$                                                                                  | MoK $\alpha$                                                    | MoK $\alpha$                                                                                 | MoK $\alpha$                                                                  |
| $\mu$ (mm <sup>-1</sup> )                                   | 0.891                                                                          | 0.625                                                                         | 0.753                                                                                         | 0.446                                                                         | 0.559                                                                                         | 0.818                                                           | 0.629                                                                                        | 0.448                                                                         |
| Crystal size (mm)                                           | 0.15x0.07x0.02                                                                 | 0.10x0.09x0.02                                                                | 0.08x0.07x0.06                                                                                | 0.10x0.04x0.02                                                                | 0.40x0.12x0.03                                                                                | 0.15x0.14x0.01                                                  | 0.20x0.18x0.02                                                                               | 0.15x0.14x0.03                                                                |
| Meas. Refl.                                                 | 41628                                                                          | 57462                                                                         | 71977                                                                                         | 9661                                                                          | 95811                                                                                         | 5579                                                            | 7067                                                                                         | 79947                                                                         |
| Indep. Refl.                                                | 6590                                                                           | 6442                                                                          | 7147                                                                                          | 9661                                                                          | 7819                                                                                          | 5579                                                            | 7069                                                                                         | 9039                                                                          |
| Obsvd. [ <i>I</i> > 2 $\sigma$ ( <i>I</i> )]                | 5130                                                                           | 4964                                                                          | 5590                                                                                          | 7424                                                                          | 5626                                                                                          | 5098                                                            | 6390                                                                                         | 7166                                                                          |
| <i>R</i> <sub>int</sub>                                     | 0.0884                                                                         | 0.1129                                                                        | 0.1079                                                                                        | 0.1968                                                                        | 0.1362                                                                                        | 0.0975                                                          | 0.0858                                                                                       | 0.1121                                                                        |
| <i>R</i> <sub>1</sub> [ <i>I</i> > 2 $\sigma$ ( <i>I</i> )] | 0.0437                                                                         | 0.0486                                                                        | 0.0746                                                                                        | 0.1073                                                                        | 0.0528                                                                                        | 0.0694                                                          | 0.0694                                                                                       | 0.0703                                                                        |
| w <i>R</i> <sub>2</sub> ( <i>F</i> <sup>2</sup> )           | 0.1088                                                                         | 0.1256                                                                        | 0.2093                                                                                        | 0.2301                                                                        | 0.0760                                                                                        | 0.1116                                                          | 0.1490                                                                                       | 0.2077                                                                        |
| Goof                                                        | 1.036                                                                          | 1.032                                                                         | 1.031                                                                                         | 1.165                                                                         | 1.019                                                                                         | 1.226                                                           | 1.199                                                                                        | 1.053                                                                         |
| $\Delta\rho_{\max}$ (e Å <sup>-3</sup> )                    | 0.523                                                                          | 0.580                                                                         | 3.854                                                                                         | 0.878                                                                         | 0.557                                                                                         | 0.501                                                           | 0.643                                                                                        | 1.073                                                                         |
| $\Delta\rho_{\min}$ (e Å <sup>-3</sup> )                    | -0.431                                                                         | -0.459                                                                        | -0.719                                                                                        | -0.549                                                                        | -0.638                                                                                        | -0.476                                                          | -0.412                                                                                       | -0.601                                                                        |
| CCDC                                                        | 2294436                                                                        | 2294437                                                                       | 2294438                                                                                       | 2294435                                                                       | 2294440                                                                                       | 2294434                                                         | 2294433                                                                                      | 2294439                                                                       |

\*The structure of 4 was heavily twinned, which explains the rather high ESD values obtained.

\*\* Refined as a two component twin.

Table S2: Crystallographic data for complexes **9**, **11**, **12'**, **13** and **14**.

|                                                    | <b>9</b>                                                                                                                       | <b>11</b>                                                                                                          | <b>12'</b>                                                                                                         | <b>13</b>                                                                                                 | <b>14</b>                                                                                                                                         |
|----------------------------------------------------|--------------------------------------------------------------------------------------------------------------------------------|--------------------------------------------------------------------------------------------------------------------|--------------------------------------------------------------------------------------------------------------------|-----------------------------------------------------------------------------------------------------------|---------------------------------------------------------------------------------------------------------------------------------------------------|
| Chemical formula                                   | C <sub>46</sub> H <sub>55</sub> N <sub>7</sub> Ni <sub>1</sub><br>C <sub>6</sub> H <sub>6</sub> C <sub>5</sub> H <sub>12</sub> | C <sub>38</sub> H <sub>39</sub> N <sub>7</sub> F <sub>4</sub> Ni <sub>1</sub><br>0.8 C <sub>6</sub> H <sub>6</sub> | C <sub>39</sub> H <sub>43</sub> N <sub>7</sub> O <sub>2</sub> Ni <sub>1</sub><br>2(C <sub>6</sub> H <sub>6</sub> ) | C <sub>39.92</sub> H <sub>47.28</sub> O <sub>6.16</sub> Cl <sub>0.12</sub> N <sub>7</sub> Ni <sub>1</sub> | C <sub>33</sub> H <sub>38</sub> N <sub>8</sub> Ni <sub>1</sub><br>0.471(C <sub>7</sub> H <sub>8</sub> )<br>0.487(C <sub>2</sub> H <sub>3</sub> N) |
| <i>M<sub>r</sub></i>                               | 914.93                                                                                                                         | 790.96                                                                                                             | 856.73                                                                                                             | 786.69                                                                                                    | 668.84                                                                                                                                            |
| Crystal system                                     | Monoclinic                                                                                                                     | Triclinic                                                                                                          | Monoclinic                                                                                                         | Monoclinic                                                                                                | Monoclinic                                                                                                                                        |
| Space group                                        | <i>P</i> 2 <sub>1</sub> / <i>c</i>                                                                                             | <i>P</i> -1                                                                                                        | <i>C</i> 2                                                                                                         | <i>P</i> 2 <sub>1</sub> / <i>n</i>                                                                        | <i>P</i> 2 <sub>1</sub> / <i>n</i>                                                                                                                |
| <i>a</i> (Å)                                       | 10.2341(10)                                                                                                                    | 7.8623(11)                                                                                                         | 15.1996(9)                                                                                                         | 12.26757(15)                                                                                              | 12.5534(4)                                                                                                                                        |
| <i>b</i> (Å)                                       | 11.5523(14)                                                                                                                    | 14.8825(18)                                                                                                        | 16.7302(8)                                                                                                         | 13.99843(13)                                                                                              | 11.2678(4)                                                                                                                                        |
| <i>c</i> (Å)                                       | 41.346(4)                                                                                                                      | 17.700(2)                                                                                                          | 17.9276(10)                                                                                                        | 22.5929(2)                                                                                                | 23.8559(10)                                                                                                                                       |
| α (°)                                              | 90                                                                                                                             | 77.464(4)                                                                                                          | 90                                                                                                                 | 90                                                                                                        | 90                                                                                                                                                |
| β (°)                                              | 96.430(3)                                                                                                                      | 79.327(5)                                                                                                          | 107.549(2)                                                                                                         | 97.2879(11)                                                                                               | 100.0500(10)                                                                                                                                      |
| γ (°)                                              | 90                                                                                                                             | 85.883(5)                                                                                                          | 90                                                                                                                 | 90                                                                                                        | 90                                                                                                                                                |
| <i>V</i> (Å <sup>3</sup> )                         | 4857.5(9)                                                                                                                      | 1985.7(4)                                                                                                          | 4346.7(4)                                                                                                          | 3848.46(7)                                                                                                | 3322.6                                                                                                                                            |
| <i>Z</i>                                           | 4                                                                                                                              | 2                                                                                                                  | 4                                                                                                                  | 4                                                                                                         | 4                                                                                                                                                 |
| Density (g cm <sup>-3</sup> )                      | 1.251                                                                                                                          | 1.323                                                                                                              | 1.309                                                                                                              | 1.358                                                                                                     | 1.337                                                                                                                                             |
| <i>F</i> (000)                                     | 1968                                                                                                                           | 827                                                                                                                | 1816                                                                                                               | 1660                                                                                                      | 1417                                                                                                                                              |
| Radiation Type                                     | MoK <sub>α</sub>                                                                                                               | MoK <sub>α</sub>                                                                                                   | MoK <sub>α</sub>                                                                                                   | CuK <sub>α</sub>                                                                                          | MoK <sub>α</sub>                                                                                                                                  |
| μ (mm <sup>-1</sup> )                              | 0.445                                                                                                                          | 0.547                                                                                                              | 0.496                                                                                                              | 1.269                                                                                                     | 0.625                                                                                                                                             |
| Crystal size (mm)                                  | 0.14x0.12x0.02                                                                                                                 | 0.15x0.14x0.02                                                                                                     | 0.35x.011x0.09                                                                                                     | 0.08.x0.058x0.015                                                                                         | 0.45x0.40x0.35                                                                                                                                    |
| Meas. Refl.                                        | 73579                                                                                                                          | 79172                                                                                                              | 44884                                                                                                              | 47663                                                                                                     | 74517                                                                                                                                             |
| Indep. Refl.                                       | 8681                                                                                                                           | 7072                                                                                                               | 4623                                                                                                               | 7565                                                                                                      | 7637                                                                                                                                              |
| Obsvd. [ <i>I</i> > 2σ( <i>I</i> )]                | 7116                                                                                                                           | 5113                                                                                                               | 3641                                                                                                               | 6505                                                                                                      | 6760                                                                                                                                              |
| <i>R</i> <sub>int</sub>                            | 0.0509                                                                                                                         | 0.1240                                                                                                             | 0.0991                                                                                                             | 0.0329                                                                                                    | 0.0424                                                                                                                                            |
| <i>R</i> <sub>1</sub> [ <i>I</i> > 2σ( <i>I</i> )] | 0.0675                                                                                                                         | 0.0741                                                                                                             | 0.0525                                                                                                             | 0.0638                                                                                                    | 0.0344                                                                                                                                            |
| w <i>R</i> <sub>2</sub> ( <i>F</i> <sup>2</sup> )  | 0.1761                                                                                                                         | 0.2194                                                                                                             | 0.1379                                                                                                             | 0.1682                                                                                                    | 0.0971                                                                                                                                            |
| Goof                                               | 1.069                                                                                                                          | 1.031                                                                                                              | 1.045                                                                                                              | 1.123                                                                                                     | 1.047                                                                                                                                             |
| Δρ <sub>max</sub> (e Å <sup>-3</sup> )             | 1.088                                                                                                                          | 2.245                                                                                                              | 0.475                                                                                                              | 0.719                                                                                                     | 0.505                                                                                                                                             |
| Δρ <sub>min</sub> (e Å <sup>-3</sup> )             | -0.650                                                                                                                         | -0.486                                                                                                             | -0.290                                                                                                             | -0.365                                                                                                    | -0.369                                                                                                                                            |
| CCDC                                               | 2295617                                                                                                                        | 2296517                                                                                                            | 2294782                                                                                                            | 2306311                                                                                                   | 2294579                                                                                                                                           |

Table S3: Selected bond lengths and angles for complexes **1** – **10**

|                | <b>1</b>   | <b>2[H<sub>2</sub>O]</b> | <b>3</b>   | <b>4</b>  | <b>5</b>   | <b>6</b> | <b>7</b>   | <b>8</b>   | <b>9</b>   |
|----------------|------------|--------------------------|------------|-----------|------------|----------|------------|------------|------------|
| Ni1 – N10      | 1.862(2)   | 1.857(2)                 | 1.858(3)   | 1.892(9)  | 1.862(3)   | 1.872(4) | 1.862(3)   | 1.871(3)   | 1.881(3)   |
| Ni1 – C1       | 1.916(3)   | 1.929(3)                 | 1.926(4)   | 1.907(10) | 1.921(3)   | 1.954(5) | 1.989(4)   | 1.913(4)   | 1.947(4)   |
| Ni1 – C2       | 1.946(3)   | 1.919(3)                 | 1.934(4)   | 1.906(10) | 1.907(3)   | 1.925(5) | 1.986(4)   | 1.914(4)   | 1.938(4)   |
| Ni1 – X        | 2.2007(8)  | 1.848(2)                 | 1.874(3)   | 2.243(6)  | 1.937(3)   | 1.913(5) | 1.893(3)   | 1.846(4)   | 1.849(4)   |
| N10 – Ni1 – X  | 158.69(7)  | 165.86(10)               | 168.36(15) | 154.1(2)  | 156.20(12) | 168.4(2) | 179.55(14) | 160.62(16) | 164.72(15) |
| C1 – Ni1 – C2  | 165.61(11) | 167.12(12)               | 169.91(18) | 157.2(3)  | 163.83(13) | 169.2(2) | 176.11(16) | 163.05(16) | 169.69(15) |
| N10 – Ni1 – C1 | 89.75(10)  | 91.84(11)                | 91.31(16)  | 90.7(4)   | 91.80(12)  | 91.9(2)  | 91.62(15)  | 92.12(15)  | 92.13(13)  |
| C1 – Ni1 – X   | 89.14(8)   | 88.98(11)                | 89.76(15)  | 97.9(3)   | 90.94(12)  | 91.8(2)  | 88.01(14)  | 91.15(17)  | 91.12(15)  |
| X – Ni1 – C2   | 93.66(8)   | 91.44(10)                | 88.86(16)  | 90.7(3)   | 92.47(12)  | 87.7(2)  | 88.25(15)  | 91.32(17)  | 88.42(15)  |
| C2 – Ni1 – N10 | 92.68(10)  | 90.89(11)                | 92.06(17)  | 90.6(3)   | 91.43(12)  | 90.7(2)  | 92.12(15)  | 91.09(15)  | 91.00(13)  |
| $\tau_4'$      | 0.27       | 0.19                     | 0.16       | 0.35      | 0.30       | 0.16     | 0.04       | 0.26       | 0.16       |

X = Cl1, O1, S1, N1, C40, N40, N11

Table S4: Selected bond lengths and angles for complexes **11** – **14**

|                | <b>11</b>  | <b>12<sup>a</sup></b> | <b>13</b>  | <b>14</b>  |
|----------------|------------|-----------------------|------------|------------|
| Ni1 – N10      | 1.871(4)   | 1.857(3)              | 1.866(2)   | 1.8718(13) |
| Ni1 – C1       | 1.972(4)   | 1.936(2)              | 1.951(3)   | 1.9340(15) |
| Ni1 – C2       | 1.977(4)   | -                     | 1.938(3)   | 1.9290(16) |
| Ni1 – X        | 1.867(4)   | 1.906(3)              | 1.913(2)   | 1.8501(18) |
| N10 – Ni1 – X  | 179.78(18) | 169.96(14)            | 170.80(11) | 158.93(7)  |
| C1 – Ni1 – C2  | 176.24(17) | 168.17(15)            | 170.12(15) | 167.96(6)  |
| N10 – Ni1 – C1 | 91.99(16)  | 91.65(7)              | 90.84(12)  | 92.47(6)   |
| C1 – Ni1 – X   | 88.13(16)  | 89.36(7)              | 88.86(12)  | 89.98(7)   |
| X – Ni1 – C2   | 91.72(16)  | -                     | 90.01(12)  | 90.35(7)   |
| C2 – Ni1 – N10 | 88.17(17)  | -                     | 91.83(12)  | 91.55(6)   |
| $\tau_4'$      | 0.04       | 0.15                  | 0.14       | 0.26       |

X = Cl1, O1, S1, N1, C40, N40, N11

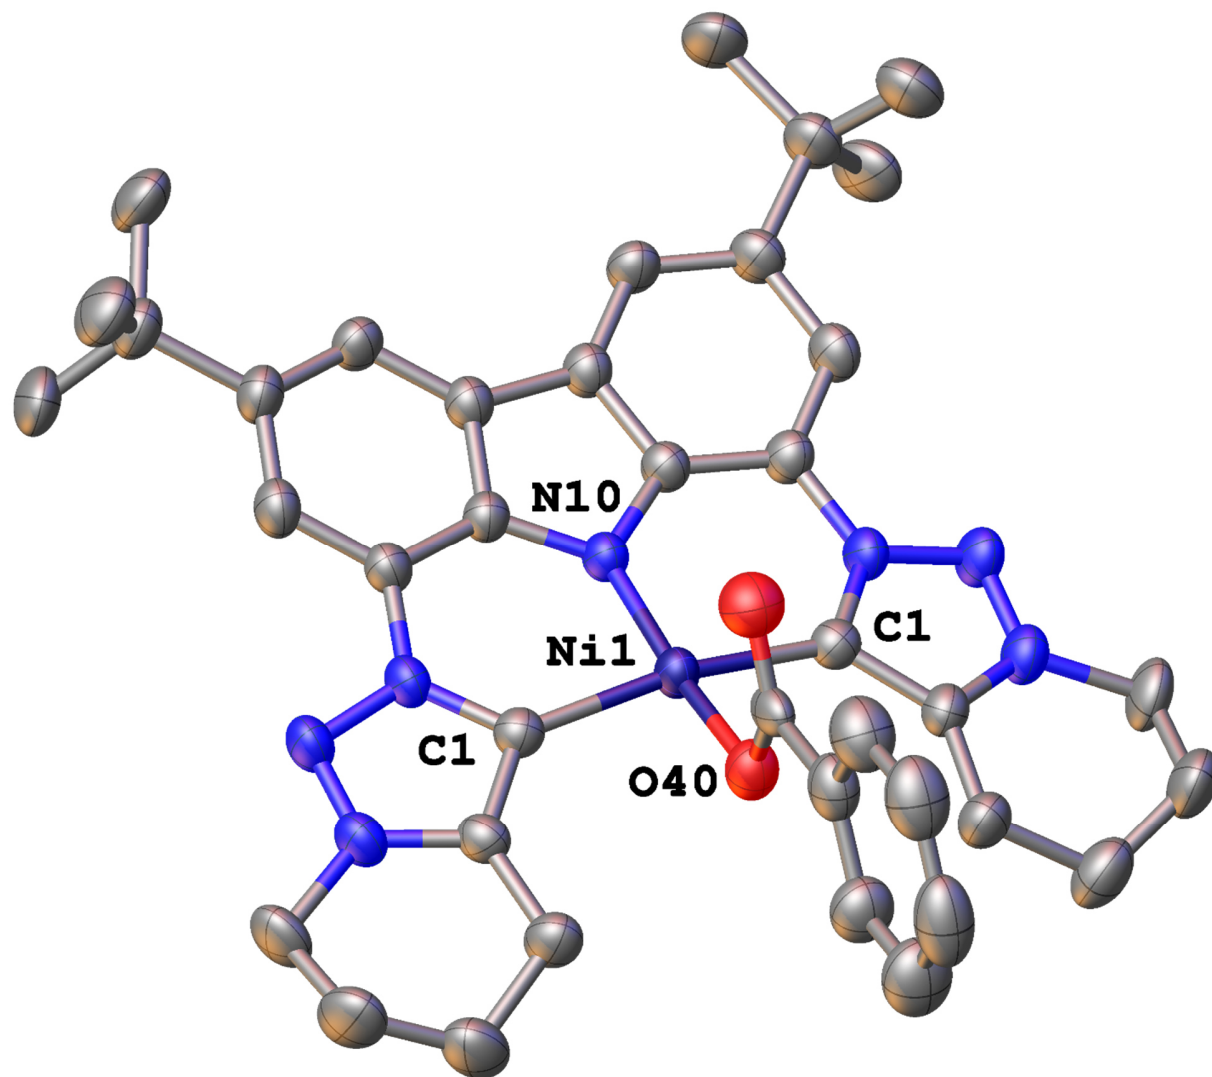

Figure S 112: Molecular structure of **12'**. Hydrogen atoms and lattice solvents have been omitted for clarity. Ellipsoids are shown at a probability level of 50%.

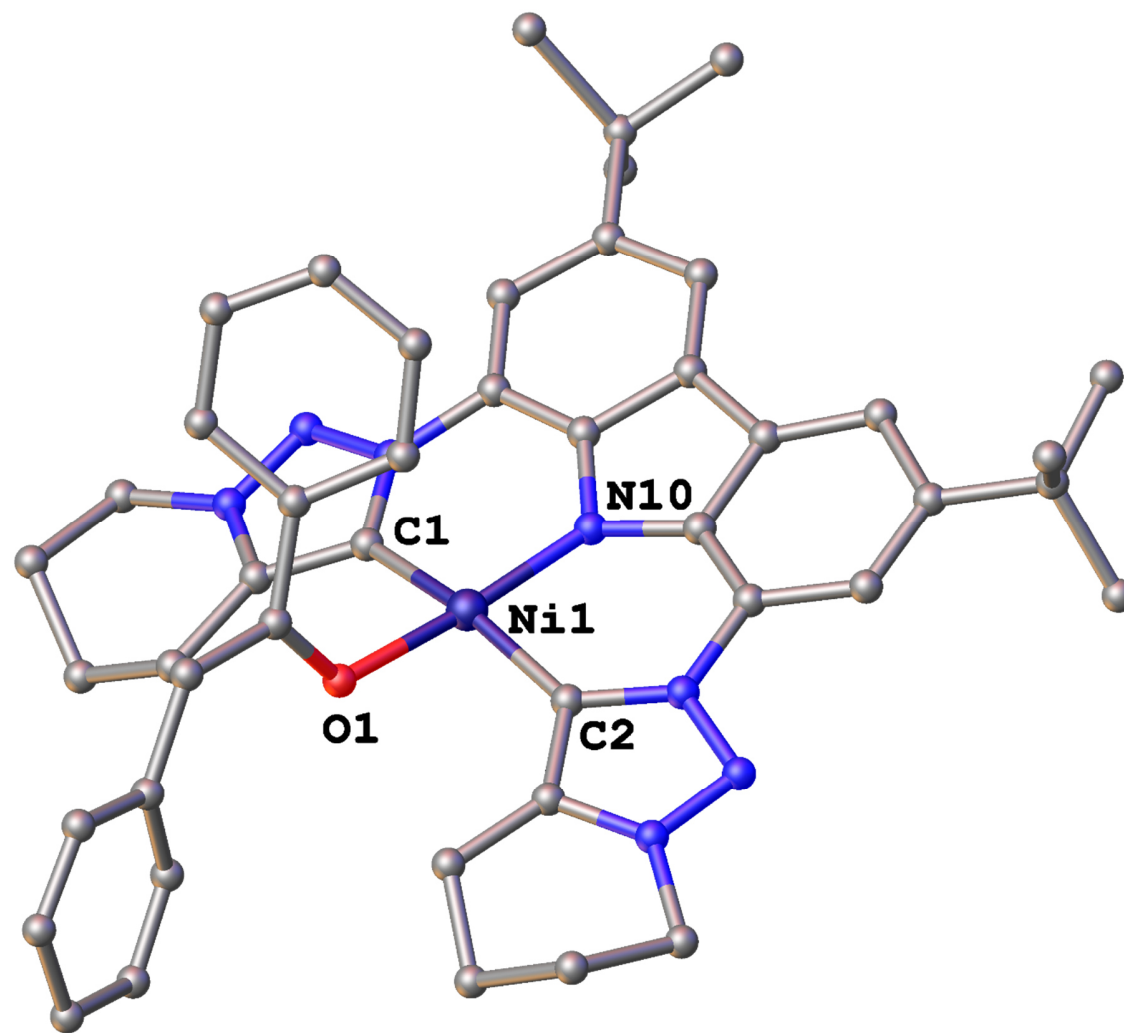

*Figure S 113: Molecular structure of complex 12. The structure is heavily twinned with many overlying spots, wherefore the twin component could not be cleanly separated leading to R1 values of 15 % lowest. In addition to this unresolvable twinning, a full molecule disorder is present with a second complex molecule stand perpendicular to the shown being only occupied by 20%. Although the quality of the crystal structure is low, the connectivity can unambiguously be determined from the data set.*

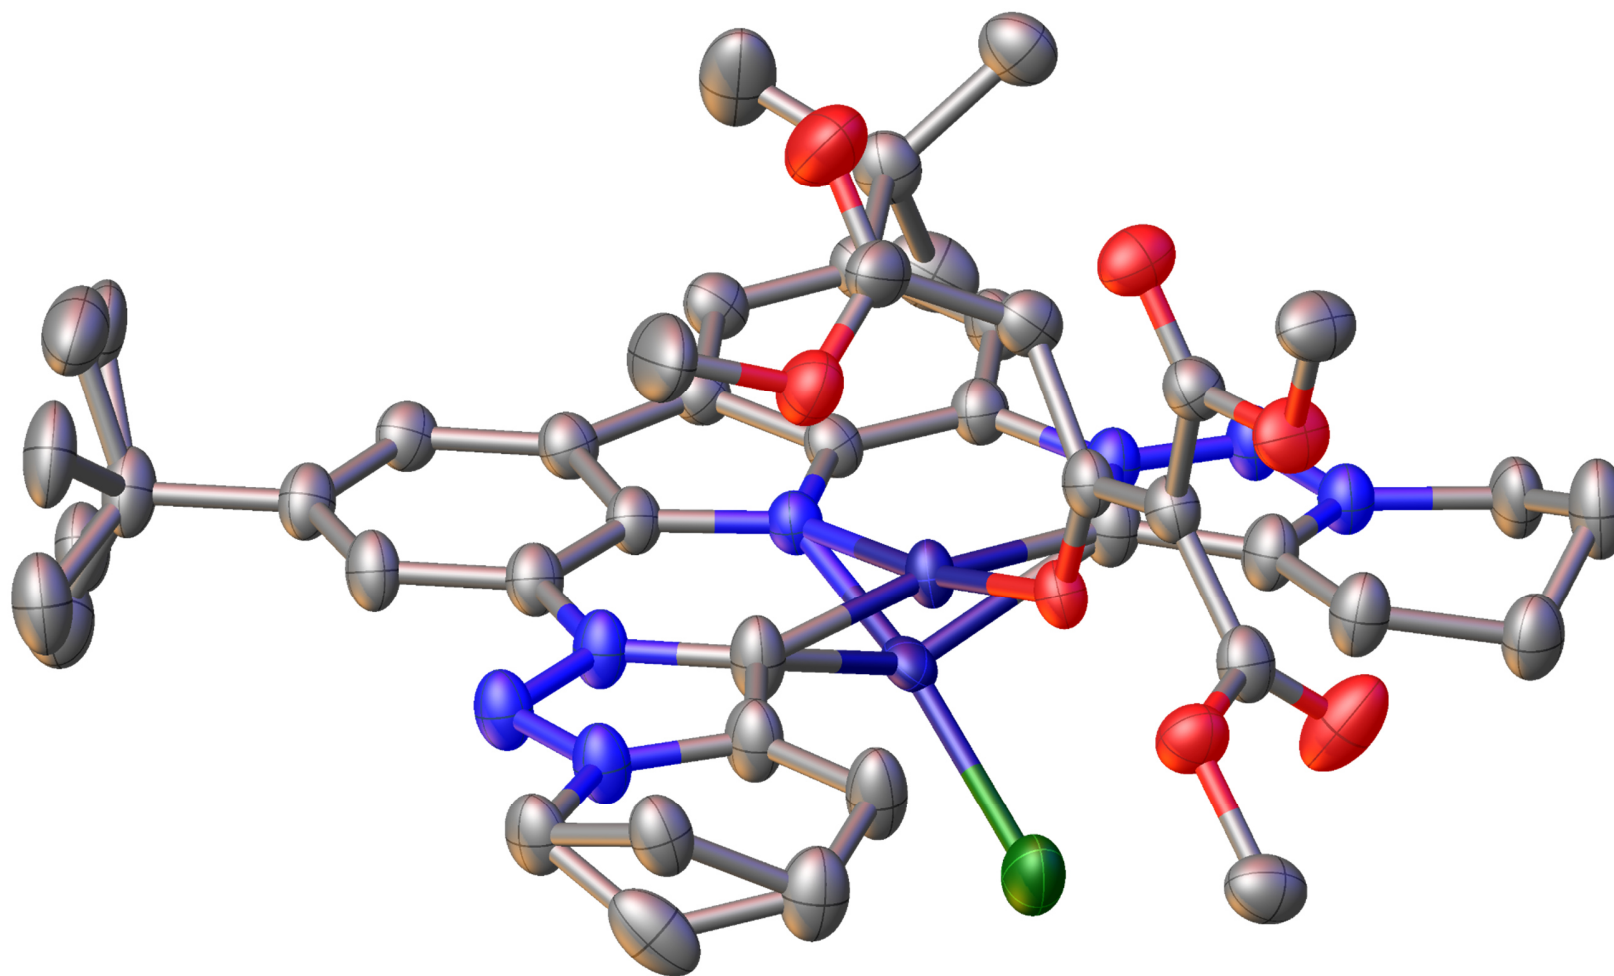

Figure S 114: Full molecular structure of **13**, containing all disorders and the impurity with compound 1. Note that the occupation of the Ni and Cl center are only 12 %. Hydrogen atoms have been omitted for clarity. Ellipsoids are shown at a probability level of 50%.

## 5. Computational details

Computations were performed with ORCA 5.0<sup>1</sup> program package, geometry optimizations and frequency calculations were carried out with density functional theory (DFT) using the B3LYP<sup>2</sup> functional, Grimme's D3 dispersion correction<sup>3</sup> and 6-31G\*\* basis set<sup>4,5</sup>. The calculated structure was verified as true minimum by the absence of negative eigenvalues in the harmonic vibrational frequency analysis.

Table S5: XYZ Coordinates Compound 2.

| At. | x            | y            | z            | At. | x            | y            | z            |
|-----|--------------|--------------|--------------|-----|--------------|--------------|--------------|
| Ni  | -0.105941000 | -1.518939000 | 0.174024000  | H   | -2.987540000 | -4.022613000 | 0.844083000  |
| O   | -0.473265000 | -3.244613000 | 0.732614000  | H   | -2.108531000 | -4.128004000 | -0.639594000 |
| H   | 0.203239000  | -3.475204000 | 1.379872000  | C   | 4.621750000  | 5.022355000  | 0.169333000  |
| N   | 0.202627000  | 0.310321000  | -0.134566000 | H   | 4.106097000  | 5.327392000  | -0.747023000 |
| N   | -2.691228000 | -0.114436000 | -0.340712000 | H   | 5.552667000  | 5.595137000  | 0.233159000  |
| N   | 2.819243000  | -0.996355000 | -0.047442000 | H   | 3.998312000  | 5.303981000  | 1.024174000  |
| N   | -4.162117000 | -1.560120000 | -0.567048000 | C   | -3.299031000 | 4.839609000  | -0.370898000 |
| N   | -3.996059000 | -0.248624000 | -0.601860000 | H   | 5.324688000  | 3.450318000  | -1.981771000 |
| C   | -0.742481000 | 1.307097000  | -0.197183000 | C   | 2.963665000  | -5.424827000 | -0.940809000 |
| C   | -1.997300000 | -1.295291000 | -0.140342000 | H   | 2.691892000  | -6.478511000 | -0.825655000 |
| C   | 1.777733000  | -1.904467000 | 0.079970000  | H   | 2.890546000  | -5.188188000 | -2.010494000 |
| C   | 1.408315000  | 0.962382000  | -0.055008000 | C   | -2.529954000 | 6.170719000  | -0.322593000 |
| C   | -2.133063000 | 1.187674000  | -0.295675000 | H   | -1.950606000 | 6.269460000  | 0.601089000  |
| C   | 2.448723000  | -3.119573000 | -0.120279000 | H   | -3.235703000 | 7.006751000  | -0.363533000 |
| C   | -0.162592000 | 2.609613000  | -0.158792000 | H   | -1.844762000 | 6.272275000  | -1.170538000 |
| C   | -3.013984000 | -2.247402000 | -0.303098000 | C   | -4.269575000 | 4.801456000  | 0.830212000  |
| C   | 3.802252000  | 1.253213000  | 0.081084000  | H   | -4.879932000 | 3.893551000  | 0.828020000  |
| C   | 1.992266000  | -4.545969000 | -0.141216000 | H   | -4.948718000 | 5.661687000  | 0.803334000  |
| H   | 0.963632000  | -4.568317000 | -0.505177000 | H   | -3.717488000 | 4.829732000  | 1.775173000  |
| H   | 1.945616000  | -4.925188000 | 0.889950000  | C   | -4.111021000 | 4.801875000  | -1.684796000 |

|   |              |              |              |   |              |              |              |
|---|--------------|--------------|--------------|---|--------------|--------------|--------------|
| C | -2.922524000 | 2.332615000  | -0.348584000 | H | -3.444184000 | 4.831164000  | -2.552623000 |
| H | -3.995543000 | 2.206972000  | -0.420576000 | H | -4.788207000 | 5.662067000  | -1.742354000 |
| C | -2.359844000 | 3.625155000  | -0.311060000 | H | -4.716289000 | 3.893687000  | -1.759990000 |
| C | -0.968179000 | 3.748910000  | -0.215438000 | N | 4.019578000  | -1.527298000 | -0.299049000 |
| H | -0.502813000 | 4.727250000  | -0.182211000 | N | 3.764676000  | -2.824097000 | -0.327943000 |
| C | 2.694223000  | 0.414124000  | 0.005979000  | H | 4.783145000  | 0.796959000  | 0.130125000  |
| C | -5.545571000 | -3.572312000 | -0.422412000 | H | -5.626197000 | -3.608808000 | 0.671046000  |
| H | -6.456031000 | -4.022634000 | -0.830751000 | C | 5.844413000  | 3.218234000  | -1.046505000 |
| C | 1.262638000  | 2.381579000  | -0.062628000 | C | 5.703038000  | 3.187296000  | 1.470272000  |
| C | 4.938945000  | 3.517521000  | 0.168827000  | C | 4.402142000  | -5.191553000 | -0.458629000 |
| C | 3.669123000  | 2.656607000  | 0.085168000  | C | 4.834235000  | -3.747818000 | -0.718224000 |
| C | 2.384040000  | 3.209885000  | 0.008000000  | H | 6.138411000  | 2.165030000  | -1.081252000 |
| H | 2.248542000  | 4.285250000  | 0.003518000  | H | 6.759450000  | 3.820542000  | -1.003074000 |
| C | -5.479851000 | -2.116994000 | -0.882982000 | H | 5.999718000  | 2.134997000  | 1.508367000  |
| H | -5.622418000 | -2.044765000 | -1.967110000 | H | 6.612170000  | 3.794930000  | 1.546505000  |
| H | -6.228609000 | -1.486422000 | -0.398600000 | H | 5.079356000  | 3.390134000  | 2.346944000  |
| C | -4.290196000 | -4.330502000 | -0.873155000 | H | 5.109178000  | -5.856063000 | -0.965197000 |
| H | -4.206516000 | -4.270622000 | -1.966902000 | H | 4.466582000  | -5.408909000 | 0.614823000  |
| H | -4.376771000 | -5.391431000 | -0.618854000 | H | 5.032610000  | -3.586695000 | -1.783444000 |
| C | -3.034618000 | -3.741714000 | -0.213880000 | H | 5.732453000  | -3.473052000 | -0.160407000 |

## 6. Literature

- 1 F. Neese, *WIREs Comput. Mol. Sci.*, **2022**, *12*.
- 2 A. D. Becke, *J. Chem. Phys.*, **1993**, *98*, 1372-1377.
- 3 S. Grimme, J. Anthony, S. Ehrlich, H. Krieg, *J. Chem. Phys.*, **2010**, *132*.
- 4 P. C. Hariharan, J. A. Pople, *Theor. chim. Acta.*, **1973**, *28*, 213.
- 5 B. P. Pritchard, D. Altarawy, B. Didier, T. D. Gibson, T. L. Windus. *J. Chem. Inf. Model.* **2019**, *59*, 4814-4820,
